# Supplementary material for: Potential Role of mRNAs and LncRNAs in Chronic Intermittent Hypoxia Exposure-Aggravated Atherosclerosis
Source: Front Genet. 2020 Apr 9;11:290. doi: 10.3389/fgene.2020.00290 (PMC7160761; doi:10.3389/fgene.2020.00290)
Supplement: Supplementary file 2 [file Table_1.XLSX]

## Sheet: All_Gene
Supplementary Table S1 All expressed mRNAs and lnRNAs
probe_set	CIH_8W_average	CIH_12W_average	CIH_8W+Normoxia_4W_average	Normoxia_8W_average	Normoxia_12W_average	Gene.Symbol	Gene_ID	Gene_Discription	CIH_8W_1_expression	CIH_8W_2_expression	CIH_8W_3_expression	CIH_8W_4_expression	CIH_8W_5_expression	CIH_12W_1_expression	CIH_12W_2_expression	CIH_12W_3_expression	CIH_12W_4_expression	CIH_8W+Normoxia_4W_1_expression	CIH_8W+Normoxia_4W_2_expression	CIH_8W+Normoxia_4W_3_expression	CIH_8W+Normoxia_4W_4_expression	Normoxia_8W_1_expression	Normoxia_8W_2_expression	Normoxia_8W_3_expression	Normoxia_8W_4_expression	Normoxia_8W_5_expression	Normoxia_12W_1_expression	Normoxia_12W_2_expression	Normoxia_12W_3_expression	Normoxia_12W_4_expression	Normoxia_12W_5_expression
TC0100000001.mm.1	3.42774	3.13185	3.09056	3.23077	3.36843	Gm16088	ENSMUST00000160944	predicted gene 16088	3.24512	3.27177	3.66415	3.40684	3.55081	3.18262	3.26772	2.95891	3.11813	3.14744	3.34907	2.73601	3.12973	3.20598	3.32787	3.28454	3.13509	3.20038	3.37556	3.3495	3.74785	3.10333	3.2659
TC0100000002.mm.1	1.44737	1.48134	1.45807	1.45292	1.38511	KnowTID_00000001	KnowTID_00000001	NA	1.71679	1.22315	1.29412	1.49905	1.50372	1.61912	1.32714	1.60157	1.37752	1.3877	1.54129	1.56148	1.34179	1.59455	1.3864	1.41505	1.40609	1.46253	1.41782	1.26885	1.39274	1.3925	1.45366
TC0100000003.mm.1	0.988654	0.928619	0.883568	1.00121	1.0381	Gm26206	ENSMUST00000082908	predicted gene, 26206	0.952195	1.02986	1.06649	1.03175	0.862973	0.982627	0.910417	0.903767	0.917663	0.970304	0.868094	0.970732	0.725143	0.900113	0.977019	1.13257	1.01794	0.978412	0.943519	1.00081	1.13673	1.12261	0.986819
TC0100000004.mm.1	1.92931	1.84216	1.81344	1.85685	1.96558	Gm1992	ENSMUST00000161581	predicted gene 1992	1.84101	1.85033	2.23731	1.74689	1.971	1.8366	1.96327	1.90905	1.65972	1.73009	1.76173	1.89555	1.86637	1.96021	1.71807	2.22965	1.70473	1.67162	2.00549	1.8549	1.98075	2.07029	1.91648
TC0100000005.mm.1	1.37562	1.223	1.25999	1.43008	1.38575	Gm10568	XR_140426	predicted gene 10568	1.4845	1.26681	1.25314	1.23184	1.6418	1.45085	1.21742	1.02258	1.20117	1.26574	1.27702	1.30326	1.19394	1.31955	1.36169	1.49819	1.47101	1.49998	1.3303	1.38816	1.26856	1.33633	1.6054
TC0100000006.mm.1	1.65251	1.65402	1.70933	1.71353	1.73133	NONMMUT000018	NONMMUT000018	NA	1.63493	1.55338	1.65939	1.71555	1.69932	1.83947	1.56973	1.58213	1.62475	1.67247	1.73571	1.64319	1.78593	1.67587	1.7569	1.88159	1.73033	1.52296	1.66528	1.78966	1.85863	1.54577	1.7973
TC0100000007.mm.1	2.26122	2.18544	2.17205	2.20447	2.21796	KnowTID_00000003	KnowTID_00000003	NA	2.41394	2.17301	2.41093	2.22576	2.08244	2.33465	2.04238	2.1908	2.17395	2.26439	2.10711	2.09093	2.22576	2.56499	2.29602	1.95081	2.04918	2.16136	2.14282	2.2127	2.24879	2.42719	2.05829
TC0100000008.mm.1	8.94616	8.78391	8.81143	8.89325	9.01727	Gm22307	ENSMUST00000180019	predicted gene, 22307	8.80053	8.88704	9.16412	9.02131	8.85779	8.83542	8.86531	8.82444	8.61048	8.73589	8.93256	8.81201	8.76525	8.8275	8.7097	8.84774	9.02866	9.05266	8.80387	8.98925	9.34197	8.95811	8.99316
TC0100000009.mm.1	2.44535	2.33987	2.37105	2.61424	2.44699	KnowTID_00000004	KnowTID_00000004	NA	2.54194	2.4563	2.09984	2.83937	2.28931	2.08511	2.51328	2.35249	2.4086	2.35832	2.51287	2.20273	2.41027	2.731	2.45776	2.50912	2.94305	2.43025	2.39326	2.58658	2.46168	2.31152	2.48193
TC0100000011.mm.1	2.86401	2.96686	2.81284	2.77001	2.88377	KnowTID_00000005	KnowTID_00000005	NA	2.87224	2.93323	2.67326	3.00151	2.83981	2.9042	2.68359	3.2449	3.03474	2.86965	2.95783	2.76077	2.6631	3.05016	2.74894	2.79792	2.80914	2.44388	2.88056	2.89162	2.54401	2.92158	3.18109
TC0100000012.mm.1	1.4373	1.45017	1.4468	1.41556	1.45097	Gm16041	ENSMUST00000144339	predicted gene 16041	1.58857	1.26923	1.38164	1.55317	1.39389	1.41639	1.41902	1.47033	1.49493	1.25536	1.38487	1.30315	1.84383	1.38354	1.43322	1.41912	1.41998	1.42194	1.62141	1.34895	1.4279	1.38401	1.47255
TC0100000013.mm.1	1.37811	1.39439	1.44949	1.32271	1.36785	Gm17101	ENSMUST00000169520	predicted gene 17101	1.38566	1.45867	1.38996	1.29884	1.35743	1.36357	1.45664	1.39997	1.35738	1.54009	1.50132	1.44288	1.31367	1.28695	1.28863	1.37538	1.35992	1.30269	1.44376	1.36922	1.39481	1.27722	1.35423
TC0100000014.mm.1	6.49668	6.35356	6.40481	6.31911	6.40037	Atp6v1h	NM_133826	ATPase, H+ transporting, lysosomal V1 subunit H	6.21487	6.53189	6.71205	6.4516	6.57299	6.34087	6.30389	6.26508	6.5044	6.36526	6.42484	6.39303	6.4361	6.19866	6.24142	6.37672	6.29001	6.48874	6.38182	6.25821	6.51178	6.51554	6.33448
TC0100000015.mm.1	3.48874	3.29899	3.34925	3.53013	3.38539	NONMMUT000046	NONMMUT000046	NA	3.32651	3.56772	3.7151	3.45885	3.3755	3.37718	3.42865	3.2979	3.09225	3.19238	3.50381	3.24061	3.4602	3.56488	3.47649	3.50024	3.52743	3.58163	3.43472	3.31221	3.51906	3.20654	3.45444
TC0100000016.mm.1	2.412	2.50807	2.51006	2.45143	2.43959	KnowTID_00000006	KnowTID_00000006	NA	2.56567	2.34872	2.44187	2.40647	2.29725	2.6276	2.34819	2.40689	2.64959	2.4864	2.62182	2.38493	2.54709	2.54686	2.50583	2.39486	2.4421	2.36749	2.31212	2.42519	2.55865	2.37449	2.52749
TC0100000017.mm.1	1.43491	1.41252	1.35822	1.29317	1.39698	KnowTID_00000007	KnowTID_00000007	NA	1.40313	1.39683	1.56027	1.32233	1.49201	1.53931	1.56352	1.27768	1.26956	1.2383	1.28539	1.55233	1.35683	1.41729	1.2666	1.34223	1.21767	1.22206	1.43954	1.21763	1.46085	1.42551	1.44138
TC0100000018.mm.1	1.93224	1.92999	1.96304	1.96568	1.98233	Oprk1	NM_001204371	opioid receptor, kappa 1	1.95955	1.97851	1.89719	1.98305	1.84288	1.9121	1.88203	1.96918	1.95665	1.77999	2.05766	1.981	2.0335	2.00233	1.98741	1.99754	1.94198	1.89916	1.87933	2.09461	1.9764	2.00356	1.95774
TC0100000019.mm.1	1.74362	1.87146	1.79968	1.75579	1.79125	NONMMUT000051	NONMMUT000051	NA	2.00068	1.39414	1.72619	1.69486	1.90226	1.80319	2.0006	1.89661	1.78543	1.94885	1.79356	1.59292	1.86338	1.87544	1.64311	1.68706	1.83232	1.74103	1.9753	1.65022	1.75947	1.80782	1.76341
TC0100000020.mm.1	1.08735	1.25299	1.06623	1.10891	1.15041	NONMMUT000052	NONMMUT000052	NA	1.03597	1.17458	1.0778	1.08796	1.06044	1.25867	1.23229	1.25868	1.2623	1.06449	1.18114	0.924694	1.09458	1.19805	1.11171	1.10073	1.13285	1.00123	1.15578	1.17026	1.2428	0.983096	1.20012
TC0100000021.mm.1	6.60425	6.45412	6.59893	6.54133	6.41403	Rb1cc1	NM_009826	RB1-inducible coiled-coil 1	6.4664	6.55967	6.48238	6.83476	6.67803	6.41826	6.43635	6.4259	6.53597	6.61935	6.64428	6.65701	6.47509	6.5739	6.56604	6.5676	6.46308	6.53603	6.49541	6.27473	6.41306	6.4375	6.44947
TC0100000022.mm.1	1.45991	1.46862	1.47966	1.46794	1.41486	Fam150a	NM_001195732	family with sequence similarity 150, member A	1.45328	1.4412	1.45939	1.38814	1.55756	1.53658	1.46085	1.53067	1.3464	1.48509	1.33749	1.44341	1.65267	1.45445	1.4667	1.46781	1.47132	1.47942	1.4898	1.35988	1.415	1.4195	1.39011
TC0100000023.mm.1	2.51099	2.27041	2.21095	2.14642	2.34897	St18	NM_001244692	suppression of tumorigenicity 18	2.08194	2.80766	3.19706	2.20716	2.26113	2.46079	2.11007	2.1942	2.31658	2.10474	2.2645	2.15834	2.31621	2.12093	1.99087	1.91589	2.31784	2.38656	2.29152	2.44716	2.35054	2.47989	2.17575
TC0100000025.mm.1	1.4176	1.40965	1.31299	1.39036	1.33175	NONMMUT000067	NONMMUT000067	NA	1.37163	1.23013	1.66117	1.4502	1.37488	1.42119	1.47771	1.31161	1.4281	1.44941	1.29141	1.33171	1.17942	1.38767	1.36916	1.38559	1.28045	1.52892	1.32039	1.30423	1.33035	1.40908	1.2947
TC0100000026.mm.1	1.55538	1.63007	1.61188	1.58731	1.71339	NONMMUT000068	NONMMUT000068	NA	1.49569	1.72591	1.59022	1.52789	1.43718	1.61351	1.55778	1.76906	1.57992	1.4602	1.71052	1.70498	1.57183	1.43416	1.54301	1.51525	1.65516	1.78899	1.8693	1.7604	1.7594	1.57503	1.60284
TC0100000027.mm.1	7.43319	7.3607	7.49795	7.41351	7.38797	Pcmtd1	NM_183028	protein-L-isoaspartate (D-aspartate) O-methyltransferase domain containing 1	7.37728	7.22027	7.47217	7.64355	7.4527	7.36521	7.30039	7.33051	7.44668	7.51377	7.53272	7.52393	7.42139	7.49969	7.46201	7.40833	7.48778	7.20975	7.4842	7.20066	7.48229	7.38195	7.39077
TC0100000028.mm.1	4.76824	4.56849	4.68081	4.69321	4.48406	NONMMUT000074	NONMMUT000074	NA	4.37546	4.88245	4.8886	4.87238	4.82232	4.71347	4.64392	4.49794	4.41861	4.69008	4.83471	4.71851	4.47995	4.94798	4.7035	4.48601	4.68318	4.64538	4.49812	4.40964	4.32022	4.36846	4.82386
TC0100000029.mm.1	4.86224	4.94396	4.94937	4.76979	4.68343	NONMMUT000076	NONMMUT000076	NA	4.56477	4.77666	4.77751	5.13303	5.05926	4.66336	4.98033	5.01041	5.12176	5.08748	5.0045	4.88359	4.82191	4.8177	4.93064	4.82508	4.56016	4.71538	4.75138	4.63955	4.53949	4.43126	5.05549
TC0100000030.mm.1	5.44883	5.48288	5.32627	5.46528	5.41102	Gm9826	ENSMUST00000029124	predicted gene 9826	5.4637	5.30529	5.47258	5.45683	5.54574	5.52639	5.4581	5.63298	5.31406	5.36382	5.41926	5.11585	5.40613	5.46131	5.42235	5.45239	5.51583	5.47451	5.43978	5.55281	5.22486	5.37996	5.45768
TC0100000031.mm.1	2.61121	2.6415	2.82656	2.70934	2.72617	Gm23274	ENSMUST00000104056	predicted gene, 23274	2.67647	2.63828	2.83309	2.45373	2.45449	2.92191	2.56173	2.6177	2.46466	2.85059	2.70135	2.828	2.92631	2.7888	2.61812	2.50182	2.80867	2.82929	2.80286	2.69253	2.70978	2.62305	2.80262
TC0100000032.mm.1	1.4549	1.50867	1.51407	1.40326	1.40262	KnowTID_00000008	KnowTID_00000008	NA	1.47566	1.30295	1.37979	1.77732	1.33876	1.44559	1.57102	1.5667	1.45137	1.54514	1.44564	1.49983	1.56569	1.46026	1.31489	1.26943	1.45203	1.51969	1.51127	1.47811	1.46634	1.27301	1.28437
TC0100000033.mm.1	1.41768	1.47264	1.34605	1.4217	1.39886	NONMMUT000087	NONMMUT000087	NA	1.23669	1.47706	1.34765	1.48741	1.53962	1.4983	1.48505	1.47466	1.43254	1.37963	1.34021	1.35561	1.30875	1.43923	1.48581	1.33391	1.38775	1.4618	1.38633	1.44259	1.44452	1.33055	1.39031
TC0100000034.mm.1	4.59082	4.41463	4.56897	4.76097	4.60977	Gm24276	ENSMUST00000102181	predicted gene, 24276	4.80902	4.71807	4.95655	4.55773	3.91273	5.01028	4.65837	4.48093	3.50893	4.44951	4.81487	4.53512	4.47638	4.95768	4.74389	4.55707	4.85878	4.68744	4.68294	4.26041	5.11699	4.60663	4.38188
TC0100000035.mm.1	1.4654	1.44768	1.46609	1.43398	1.52612	NONMMUT000094	NONMMUT000094	NA	1.37423	1.49055	1.40209	1.41598	1.64414	1.51939	1.4587	1.34886	1.46378	1.51665	1.32564	1.47957	1.54249	1.45916	1.28095	1.47628	1.50465	1.44886	1.61646	1.33739	1.47485	1.69396	1.50797
TC0100000036.mm.1	1.27385	1.32222	1.21962	1.29079	1.28233	NONMMUT000098	NONMMUT000098	NA	1.32809	1.26855	1.19759	1.35517	1.21984	1.23583	1.34345	1.46459	1.245	1.22744	1.21592	1.2137	1.22141	1.32095	1.27032	1.37925	1.21512	1.2683	1.26398	1.38627	1.3579	1.20648	1.197
TC0100000037.mm.1	1.43072	1.39366	1.37507	1.4443	1.44147	Gm24765	ENSMUST00000083691	predicted gene, 24765	1.34986	1.34264	1.38657	1.54431	1.53022	1.31725	1.27229	1.47782	1.50728	1.34516	1.38905	1.42364	1.34242	1.45725	1.47391	1.36962	1.43292	1.48782	1.42168	1.49571	1.43576	1.41364	1.44057
TC0100000038.mm.1	5.37234	5.40339	5.45137	5.43502	5.44906	Rrs1	NM_021511	RRS1 ribosome biogenesis regulator homolog (S. cerevisiae)	5.37046	5.44862	5.28241	5.40474	5.35546	5.37022	5.39317	5.42915	5.42099	5.28859	5.39568	5.42357	5.69765	5.40454	5.38497	5.58386	5.38088	5.42084	5.30598	5.51054	5.47685	5.49099	5.46092
TC0100000039.mm.1	7.00748	6.71578	6.86007	7.15071	7.14855	Adhfe1	NM_175236	alcohol dehydrogenase, iron containing, 1	6.86868	6.43694	6.6951	7.61028	7.42641	6.7318	6.96783	6.52882	6.63467	7.17832	6.59547	7.03494	6.63156	7.33802	7.07229	7.02021	7.35232	6.97072	7.09938	6.89071	6.71193	7.19877	7.84196
TC0100000040.mm.1	8.85176	8.81111	8.83074	8.55005	8.70665	Gm6161	ENSMUST00000121942	predicted gene 6161	8.64945	8.81429	9.02284	9.00131	8.77094	8.65019	8.83033	8.74403	9.0199	8.72545	8.75861	8.75005	9.08886	8.58842	8.51464	8.41466	8.50201	8.7305	8.74853	8.41614	8.91123	8.66339	8.79394
TC0100000041.mm.1	2.55655	2.50879	2.59867	2.54803	2.5492	3110035E14Rik	NM_178399	RIKEN cDNA 3110035E14 gene	2.60693	2.55443	2.60256	2.51555	2.50329	2.54597	2.50822	2.4486	2.53235	2.54608	2.47091	2.47438	2.90331	2.58099	2.37687	2.64727	2.51813	2.61691	2.50433	2.65173	2.52728	2.57617	2.48649
TC0100000042.mm.1	1.48305	1.39095	1.5465	1.5441	1.52116	KnowTID_00000009	KnowTID_00000009	NA	1.56798	1.38983	1.55022	1.46986	1.43735	1.43909	1.61929	1.30968	1.19575	1.63166	1.54759	1.45524	1.55149	1.51147	1.51947	1.55413	1.58894	1.54648	1.56378	1.51367	1.54329	1.41745	1.56759
TC0100000043.mm.1	2.31698	2.30207	2.31405	2.32547	2.32877	1700034P13Rik	NR_040462	RIKEN cDNA 1700034P13 gene	2.27876	2.32493	2.32925	2.27737	2.37459	2.3317	2.23979	2.35417	2.2826	2.20252	2.3603	2.2865	2.40689	2.3532	2.33223	2.30857	2.30388	2.32946	2.26477	2.44965	2.39935	2.25402	2.27608
TC0100000044.mm.1	5.18498	5.07636	5.06548	4.9982	5.02017	Sgk3	NM_001037759	serum/glucocorticoid regulated kinase 3	5.05154	5.25711	5.44504	5.09857	5.07263	5.0792	5.04256	4.91779	5.26587	5.07521	5.08735	5.0663	5.03306	4.97608	5.00739	4.74883	5.01544	5.24326	5.04155	4.83526	5.21822	4.93278	5.07304
TC0100000045.mm.1	1.45222	1.44472	1.44266	1.44067	1.43101	Mcmdc2	NM_177722	minichromosome maintenance domain containing 2	1.46123	1.4191	1.445	1.47063	1.46515	1.42363	1.4406	1.40354	1.51113	1.42486	1.46842	1.45094	1.42642	1.42319	1.44308	1.49007	1.39726	1.44976	1.43033	1.4391	1.4333	1.41396	1.43837
TC0100000046.mm.1	3.70351	3.68384	3.71572	3.72555	3.75217	NONMMUT000132	NONMMUT000132	NA	3.73884	3.55426	3.81145	3.64606	3.76694	3.69942	3.66159	3.66133	3.71302	3.70214	3.71097	3.60041	3.84936	3.87672	3.75437	3.66493	3.66858	3.66315	3.65639	4.00978	3.75248	3.7329	3.60928
TC0100000047.mm.1	1.55106	1.62864	1.57437	1.6121	1.73527	Gm15818	ENSMUST00000134692	predicted gene 15818	1.5123	1.63996	1.46873	1.58111	1.55319	1.58256	1.60704	1.71889	1.60606	1.64181	1.51666	1.45653	1.68247	1.66568	1.60357	1.51244	1.63171	1.64708	1.65546	1.84519	1.76369	1.75977	1.65225
TC0100000048.mm.1	4.98735	5.10264	4.98345	4.86308	4.97815	Cspp1	NM_026493	centrosome and spindle pole associated protein 1	4.85836	4.93343	4.96727	5.09165	5.08605	4.97915	5.1216	5.01171	5.29811	4.96073	4.95705	5.01209	5.00393	4.8629	4.87292	4.72546	4.78478	5.06932	4.94528	4.83738	5.00698	4.97529	5.1258
TC0100000049.mm.1	2.51818	2.6542	2.69469	2.61247	2.6384	NONMMUT000139	NONMMUT000139	NA	2.13044	2.50307	2.60422	2.48138	2.87181	2.72388	2.65018	2.52574	2.71701	2.47873	2.67286	2.66314	2.96402	2.51719	2.63905	2.42533	2.68212	2.79867	2.59151	2.40073	2.70147	2.69179	2.80651
TC0100000050.mm.1	2.34359	2.33887	2.39461	2.336	2.42609	Gm26348	ENSMUST00000157528	predicted gene, 26348	2.38812	2.40885	2.34256	2.34095	2.23749	2.32053	2.38437	2.27845	2.37215	2.32193	2.41828	2.32977	2.50846	2.49857	2.17941	2.28774	2.37622	2.33808	2.52259	2.61131	2.22484	2.53336	2.23835
TC0100000051.mm.1	8.18235	7.81714	7.75753	8.13495	8.09427	NONMMUT000151	NONMMUT000151	NA	7.98537	8.2427	8.24975	8.28846	8.14546	7.68444	8.05468	7.79447	7.73496	7.56738	8.02734	7.63253	7.80288	8.29358	8.15287	8.07245	8.02889	8.12695	8.16423	8.00217	8.06558	8.02384	8.21552
TC0100000052.mm.1	4.45737	4.44756	4.51323	4.53797	4.49826	Gm15603	ENSMUST00000119252	predicted gene 15603	4.45517	4.40639	4.63062	4.299	4.49567	4.57421	4.48473	4.52075	4.21057	4.57473	4.4719	4.47803	4.52826	4.67939	4.62499	4.39067	4.46897	4.52583	4.3959	4.84306	4.52631	4.37731	4.34872
TC0100000053.mm.1	3.0167	3.04055	3.11706	3.00401	3.13225	KnowTID_00000010	KnowTID_00000010	NA	3.0275	2.94617	3.13037	3.08561	2.89384	3.08672	2.97849	3.07825	3.01876	2.97684	3.07636	3.17462	3.24042	2.91687	3.02285	3.11143	2.93565	3.03327	3.07329	3.3004	3.22815	3.00856	3.05082
TC0100000054.mm.1	3.2475	3.2994	3.45245	3.22019	3.26284	Gm22963	ENSMUST00000157960	predicted gene, 22963	3.36122	3.14303	3.35789	3.26117	3.11419	3.37484	3.4081	3.4457	2.96896	3.36735	3.3792	3.44489	3.61837	3.36286	3.13098	3.17102	3.24734	3.18873	3.20999	3.41511	3.4156	3.23747	3.03602
TC0100000055.mm.1	7.05037	6.75309	6.80985	6.81119	6.74385	Prex2	NM_001033636	phosphatidylinositol-3,4,5-trisphosphate-dependent Rac exchange factor 2	6.96541	6.88824	7.13048	7.18887	7.07885	6.90001	6.66397	6.55632	6.89208	6.85994	6.99276	6.78391	6.60279	6.87924	6.87994	6.64949	6.94124	6.70602	6.81525	6.37362	6.87292	6.7563	6.90118
TC0100000056.mm.1	2.61704	2.59194	2.70456	3.02877	3.10131	A830018L16Rik	NM_001160369	RIKEN cDNA A830018L16 gene	2.67935	2.42569	2.82211	2.49403	2.66404	2.52147	2.73947	2.58802	2.51878	2.72025	2.57651	2.85032	2.67117	2.59596	2.70662	4.38607	2.80056	2.65462	2.82286	2.80485	3.68171	3.07572	3.12142
TC0100000057.mm.1	1.31179	1.35667	1.35033	1.3888	1.29157	NONMMUT000167	NONMMUT000167	NA	1.31452	1.11216	1.38596	1.4241	1.32222	1.42125	1.28759	1.3992	1.31862	1.37612	1.26571	1.41055	1.34895	1.28413	1.37437	1.52266	1.35541	1.40742	1.30642	1.28063	1.25945	1.36503	1.24631
TC0100000058.mm.1	1.31573	1.26744	1.33726	1.39795	1.36939	NONMMUT000168	NONMMUT000168	NA	1.33137	1.31612	1.37118	1.19186	1.36812	1.13159	1.32537	1.24731	1.36548	1.37816	1.38643	1.28939	1.29506	1.20176	1.29132	1.83036	1.26859	1.39773	1.12412	1.3945	1.41865	1.31668	1.59298
TC0100000059.mm.1	8.669	8.57511	8.64253	8.59914	8.7511	Gm22633	ENSMUST00000179834	predicted gene, 22633	8.5561	8.56981	8.90462	8.76658	8.54791	8.56644	8.60894	8.62937	8.49568	8.60219	8.71728	8.64414	8.6065	8.43895	8.38165	8.61574	8.76354	8.79582	8.52357	8.66664	9.06466	8.70042	8.80022
TC0100000060.mm.1	1.378	1.41401	1.35431	1.41768	1.37668	Mir6341	NR_105759	microRNA mir-6341	1.31795	1.35343	1.39738	1.35268	1.46856	1.29442	1.39959	1.3945	1.56754	1.26619	1.35425	1.34786	1.44892	1.41552	1.43835	1.45261	1.4465	1.33544	1.43159	1.30601	1.37614	1.29298	1.47668
TC0100000061.mm.1	8.63742	8.71602	8.66963	8.72279	8.79958	Gm2383	ENSMUST00000181461	predicted gene 2383	8.76304	8.64107	8.68102	8.55267	8.54931	8.79415	8.66149	8.69461	8.71385	8.72734	8.66492	8.687	8.59925	8.56704	8.77441	8.82694	8.75728	8.6883	8.81731	8.87922	8.7854	8.8154	8.70058
TC0100000062.mm.1	4.36766	4.27489	4.36821	4.4071	4.36451	Gm6216	ENSMUST00000182390	predicted gene 6216	4.36857	4.21314	4.59862	4.16134	4.49661	4.38097	4.17288	4.36027	4.18546	4.28357	4.39614	4.48315	4.30998	4.35492	4.36745	4.60418	4.45669	4.25226	4.26027	4.39946	4.37165	4.53064	4.26054
TC0100000063.mm.1	1.55517	1.5299	1.4581	1.43106	1.43401	Gm17644	NR_045297	predicted gene, 17644	1.48521	1.60721	1.55125	1.54027	1.59191	1.36404	1.62367	1.5681	1.56377	1.42466	1.57924	1.46246	1.36606	1.39995	1.63533	1.40881	1.28027	1.43093	1.55101	1.39721	1.48772	1.30937	1.42472
TC0100000064.mm.1	9.26892	9.43141	9.30884	9.12566	9.27625	Sulf1	NM_001198565	sulfatase 1	9.33222	9.33177	9.22582	9.30694	9.14786	9.47406	9.39216	9.38022	9.47921	9.29938	9.31716	9.31392	9.30488	9.13642	9.21047	8.95135	9.13097	9.19909	9.37939	9.29599	9.0683	9.34849	9.28909
TC0100000065.mm.1	4.31541	4.74416	4.39165	4.36873	4.39215	NONMMUT000173	NONMMUT000173	NA	3.85845	4.44715	4.24644	4.46701	4.55801	4.16038	4.8596	4.82594	5.13073	4.25759	4.5308	4.43525	4.34299	4.14302	4.51999	4.65521	4.32944	4.19599	4.28518	4.61102	3.88995	4.3603	4.81431
TC0100000066.mm.1	3.15594	3.19492	3.18919	3.26526	3.24872	Gm5250	ENSMUST00000059065	predicted gene 5250	3.16298	3.21184	3.20999	3.25605	2.93886	3.19477	3.30594	3.08905	3.18992	3.20703	3.29779	3.25016	3.0018	3.36757	3.2226	3.25246	3.32735	3.15633	3.27225	3.46988	3.10428	3.29701	3.10018
TC0100000067.mm.1	2.62646	2.51216	2.59806	2.6552	2.58929	KnowTID_00000012	KnowTID_00000012	NA	2.61134	2.49652	2.64204	2.76971	2.61268	2.63065	2.61283	2.51675	2.28842	2.39029	2.61524	2.74874	2.63797	2.82557	2.78996	2.49338	2.65137	2.51572	2.31807	2.77562	2.61268	2.73285	2.50722
TC0100000068.mm.1	3.74387	3.75772	3.9562	3.88758	3.96469	ENSMUST00000183805	ENSMUST00000183805	ncrna:known chromosome:GRCm38:1:13262198:13262279:1 gene:ENSMUSG00000099183 gene_biotype:miRNA transcript_biotype:miRNA	3.7143	3.69993	3.79706	3.73029	3.77779	3.83013	3.96669	3.64562	3.58845	3.71347	4.17535	3.71723	4.21876	4.06634	3.84438	3.73427	3.69367	4.09927	4.04038	4.1439	3.80295	3.92986	3.90635
TC0100000069.mm.1	2.13517	2.0944	2.13266	2.09356	2.14305	NONMMUT000188	NONMMUT000188	NA	2.138	2.14582	2.11243	2.21101	2.06858	2.02681	2.08517	2.24992	2.01571	2.04986	2.16353	2.14298	2.17428	2.10465	2.10943	2.02019	2.16952	2.06402	2.13912	2.13995	2.18698	2.10278	2.14643
TC0100000070.mm.1	1.53426	1.62372	1.68525	1.60014	1.72134	KnowTID_00000013	KnowTID_00000013	NA	1.49222	1.40831	1.59133	1.74384	1.43559	1.69211	1.76218	1.50074	1.53985	1.64617	1.79988	1.64506	1.64989	1.61118	1.59523	1.54367	1.67697	1.57366	1.79836	1.76013	1.64016	1.61314	1.7949
TC0100000071.mm.1	1.43289	1.39482	1.49953	1.45135	1.44533	Xkr9	NM_001011873	X Kell blood group precursor related family member 9 homolog	1.40236	1.41902	1.40442	1.40458	1.53408	1.38454	1.37022	1.45745	1.36707	1.55045	1.40246	1.61469	1.43053	1.47678	1.43474	1.3521	1.43443	1.55871	1.41635	1.48244	1.52426	1.37479	1.42883
TC0100000072.mm.1	2.32837	2.3495	2.31061	2.425	2.40568	NONMMUT000195	NONMMUT000195	NA	2.33616	2.35385	2.36668	2.34777	2.23741	2.37038	2.29506	2.43837	2.29418	2.40182	2.40114	2.33447	2.105	2.35297	2.33851	2.63865	2.35676	2.43809	2.22999	2.46811	2.57036	2.4801	2.27983
TC0100000073.mm.1	2.04466	1.96659	2.0128	2.0071	2.01277	Gm25491	ENSMUST00000158733	predicted gene, 25491	2.15761	2.15388	1.99704	1.89888	2.01589	1.99325	1.95752	1.95117	1.96444	1.89351	1.94414	2.15112	2.06243	2.01572	1.99088	1.93804	2.09617	1.99469	2.04505	2.03769	2.0138	2.03654	1.93078
TC0100000074.mm.1	2.4272	2.38097	2.47582	2.52792	2.48225	NONMMUT000199	NONMMUT000199	NA	2.45606	2.51343	2.47973	2.4262	2.26058	2.4103	2.46844	2.21057	2.43457	2.38649	2.48953	2.42349	2.60377	2.62638	2.32939	2.91816	2.30662	2.45906	2.45814	2.41729	2.56019	2.50482	2.47081
TC0100000075.mm.1	1.59668	1.58877	1.56014	1.66304	1.65567	KnowTID_00000014	KnowTID_00000014	NA	1.56476	1.36106	1.84586	1.71663	1.49511	1.7616	1.45745	1.43251	1.70352	1.49859	1.57548	1.63964	1.52684	1.4513	1.4411	1.99962	1.82202	1.60119	1.81462	1.55919	1.72796	1.65451	1.52206
TC0100000076.mm.1	9.96904	9.80808	9.76426	9.95397	9.90211	Gm22616	ENSMUST00000179783	predicted gene, 22616	9.86102	10.046	9.91274	10.0418	9.98369	9.74784	9.96417	9.74244	9.77788	9.72997	9.98143	9.73364	9.61198	10.0935	9.94839	9.97426	9.90277	9.85097	9.92104	9.87364	9.87393	9.88945	9.95247
TC0100000077.mm.1	3.71325	3.75668	3.98367	3.79945	3.72242	NONMMUT000204	NONMMUT000204	NA	3.75259	3.64866	3.7302	3.73213	3.70267	3.70477	3.80818	3.76335	3.75041	3.94185	4.05772	3.92928	4.00584	3.90669	3.55661	3.84493	3.79383	3.8952	3.70025	3.90633	3.64045	3.69586	3.66921
TC0100000078.mm.1	1.18684	1.28318	1.28978	1.17293	1.14009	NONMMUT000205	NONMMUT000205	NA	1.06072	1.08092	1.15988	1.22474	1.40796	1.07213	1.40796	1.28776	1.36484	1.12176	1.30536	1.49011	1.24187	0.93434	1.28176	1.366	1.11047	1.17208	1.37601	1.05077	1.18357	1.02888	1.06119
TC0100000079.mm.1	3.42725	3.46795	3.43671	3.43323	3.39691	Gm9947	ENSMUST00000067599	predicted gene 9947	3.43788	3.25151	3.50182	3.34779	3.59723	3.50648	3.49067	3.44663	3.42802	3.36756	3.41693	3.47962	3.48275	3.62238	3.38337	3.27513	3.39162	3.49365	3.32834	3.43795	3.35469	3.49224	3.37133
TC0100000080.mm.1	1.7159	1.58222	1.72824	1.6622	1.73434	KnowTID_00000015	KnowTID_00000015	NA	1.81618	1.6877	1.43437	1.69338	1.94786	1.6606	1.63552	1.59166	1.44109	1.76047	1.75027	1.50502	1.89721	1.67071	1.62181	1.64636	1.5543	1.81783	1.67979	1.93105	1.65417	1.71809	1.68861
TC0100000081.mm.1	10.0059	9.89164	9.84914	9.96933	9.93171	Rpl5-ps1	ENSMUST00000121367	ribosomal protein L5, pseudogene 1	9.99634	9.98869	10.1693	9.90963	9.96557	9.96582	9.91476	9.91917	9.76682	9.84329	9.9741	9.82513	9.75403	10.027	9.92913	9.89799	10.0246	9.96786	9.98781	9.88761	10.0358	9.91443	9.83293
TC0100000082.mm.1	1.76169	1.67401	1.75251	1.86432	1.82213	Kcnb2	NM_001098528	potassium voltage gated channel, Shab-related subfamily, member 2	1.7595	1.69678	1.80862	1.76319	1.78037	1.71025	1.65601	1.65191	1.67786	1.7059	1.69547	1.73559	1.87306	1.72439	1.71964	2.31196	1.77908	1.78655	1.70015	1.96985	1.99413	1.85994	1.58659
TC0100000083.mm.1	1.41196	1.41898	1.43624	1.50312	1.40797	NONMMUT000210	NONMMUT000210	NA	1.23163	1.27945	1.66335	1.476	1.40936	1.48996	1.39201	1.40316	1.39079	1.51984	1.41945	1.44237	1.36332	1.2493	1.34246	2.02892	1.5298	1.36514	1.39988	1.16896	1.62844	1.4137	1.42887
TC0100000084.mm.1	1.98622	1.96395	2.05461	1.91101	1.98903	NONMMUT000211	NONMMUT000211	NA	2.05073	2.05217	1.85754	1.87409	2.09656	1.85369	1.92669	2.2144	1.86103	2.15802	2.16986	2.02974	1.86083	2.01186	1.86145	1.91677	1.77423	1.99073	1.83128	2.12299	1.90944	2.14225	1.93921
TC0100000085.mm.1	1.65197	1.63246	1.65334	1.73399	1.71795	NONMMUT000212	NONMMUT000212	NA	1.85277	1.46628	1.78842	1.55913	1.59327	1.43025	1.81483	1.77657	1.50817	1.49826	1.68013	1.67716	1.75781	1.76253	1.77927	1.66088	1.69436	1.77289	1.72848	1.71211	1.53387	1.85425	1.76102
TC0100000086.mm.1	1.19706	1.17473	1.28746	1.3375	1.2882	NONMMUT000213	NONMMUT000213	NA	1.14026	1.153	1.21821	1.28313	1.19071	1.16223	1.20807	1.17571	1.1529	1.29222	1.22477	1.28988	1.34299	1.34325	1.19414	1.35783	1.42661	1.36567	1.18296	1.24993	1.32899	1.48112	1.19798
TC0100000087.mm.1	1.50876	1.5246	1.51869	1.57542	1.56593	NONMMUT000214	NONMMUT000214	NA	1.48436	1.55858	1.49932	1.51437	1.48717	1.62557	1.57226	1.36618	1.53438	1.53413	1.59856	1.32874	1.61333	1.61024	1.49006	1.63997	1.6224	1.51443	1.60498	1.67363	1.37725	1.56948	1.60431
TC0100000088.mm.1	1.65254	1.76476	1.73895	1.72608	1.63709	NONMMUT000215	NONMMUT000215	NA	1.63013	1.72478	1.54781	1.49614	1.86386	1.81793	1.68072	1.66615	1.89425	1.55506	1.64519	1.76558	1.98999	1.66023	1.69082	1.79944	1.82964	1.65024	1.46376	1.74833	1.63474	1.65113	1.68748
TC0100000089.mm.1	1.32369	1.37444	1.3866	1.45489	1.43087	NONMMUT000218	NONMMUT000218	NA	1.31769	1.59299	1.28486	1.20049	1.22244	1.39679	1.4154	1.47192	1.21362	1.40362	1.36739	1.38342	1.39196	1.35624	1.43591	1.92457	1.2261	1.33162	1.26355	1.39789	1.59615	1.51493	1.38182
TC0100000090.mm.1	1.80479	1.61766	1.92857	1.77181	1.95044	Gm25168	ENSMUST00000104189	predicted gene, 25168	1.79817	1.45161	2.15747	1.9635	1.65322	1.60396	1.62005	1.55268	1.69394	1.69988	1.98402	2.08347	1.94693	1.64807	1.78034	1.70863	2.03421	1.68777	1.89502	1.96753	2.10604	1.79229	1.99133
TC0100000091.mm.1	2.29934	2.29785	2.33004	2.30522	2.39791	KnowTID_00000016	KnowTID_00000016	NA	2.4768	2.30232	2.2637	2.36171	2.09216	2.26397	2.32064	2.28343	2.32337	2.26608	2.41394	2.14897	2.49119	2.38486	2.3666	2.41993	2.31351	2.04121	2.2411	2.69145	2.20255	2.48935	2.36512
TC0100000092.mm.1	5.82548	5.69104	5.66459	5.58839	5.59361	Terf1	NM_001286628	telomeric repeat binding factor 1	5.61595	5.68269	6.02101	5.95518	5.85256	5.57818	5.70882	5.58163	5.89555	5.66236	5.69895	5.73589	5.56117	5.71241	5.54944	5.47403	5.57667	5.62937	5.72894	5.18737	5.94987	5.53031	5.57156
TC0100000093.mm.1	3.05819	3.09017	3.03307	3.11506	3.0158	KnowTID_00000017	KnowTID_00000017	NA	3.04791	3.07146	2.9324	3.00017	3.23902	3.0986	3.11842	3.00954	3.1341	2.90595	3.28013	3.05418	2.89204	3.25947	3.14842	3.10296	2.94484	3.11959	3.15515	3.16403	2.91821	2.93748	2.90413
TC0100000094.mm.1	2.194	2.25262	2.38295	2.29626	2.32494	NONMMUT000223	NONMMUT000223	NA	2.29657	2.0942	2.05323	2.32585	2.20013	2.10508	2.30424	2.21226	2.3889	2.35569	2.34251	2.5572	2.27638	2.40637	2.39191	2.19179	2.13491	2.35632	2.36846	2.31518	2.28488	2.34772	2.30844
TC0100000095.mm.1	3.36446	3.49311	3.52678	3.45456	3.34833	Gm23259	ENSMUST00000158318	predicted gene, 23259	3.56459	3.19954	3.47108	3.43836	3.1487	3.5348	3.53173	3.43245	3.47347	3.3255	3.65157	3.44268	3.68736	3.61351	3.47082	3.45247	3.37901	3.35699	3.52453	3.39844	3.18777	3.36096	3.26996
TC0100000096.mm.1	3.06574	2.87697	2.82055	2.91925	2.9244	Gm7634	XR_104530	predicted gene 7634	3.06201	2.97272	3.32352	2.92557	3.0449	2.99391	2.83026	2.872	2.81172	2.83509	2.90838	2.81974	2.71898	3.0382	2.67751	2.96504	2.99139	2.9241	3.05776	2.81676	3.04248	2.80111	2.90387
TC0100000097.mm.1	5.64465	5.79698	5.70241	5.66039	5.69795	Rdh10	NM_133832	retinol dehydrogenase 10 (all-trans)	5.8	5.57344	5.60339	5.72581	5.52064	5.76403	5.84299	5.62304	5.95786	5.71153	5.62771	5.72522	5.74518	5.50313	5.79762	5.41204	5.68225	5.90689	5.79176	5.67753	5.7217	5.5777	5.72106
TC0100000098.mm.1	2.07087	2.17204	2.16828	2.10898	2.09014	Gm7568	ENSMUST00000159190	predicted gene 7568	2.15285	1.94492	2.11087	2.05112	2.09457	2.12205	2.19476	2.20851	2.16286	2.13561	2.14466	2.15535	2.2375	2.17671	2.06068	2.07052	2.12825	2.10872	2.06298	2.13591	2.00845	2.10192	2.14146
TC0100000099.mm.1	2.49655	2.41037	2.5431	2.46007	2.47054	NONMMUT000248	NONMMUT000248	NA	2.8756	2.3036	2.2538	2.61188	2.43785	2.55917	2.37258	2.37795	2.33179	2.57961	2.67968	2.44202	2.47109	2.2706	2.58447	2.45952	2.49733	2.48843	2.23831	2.65361	2.37964	2.56053	2.52059
TC0100000100.mm.1	1.59877	1.57978	1.62403	1.61362	1.60025	D030040B21Rik	NR_037998	RIKEN cDNA D030040B21 gene	1.59966	1.59616	1.62964	1.56941	1.59898	1.5228	1.52759	1.70474	1.564	1.71206	1.54156	1.6181	1.62439	1.73373	1.63394	1.63607	1.66604	1.39833	1.59633	1.69843	1.60997	1.57695	1.51958
TC0100000101.mm.1	6.05906	6.07176	6.04779	6.06	6.09637	Tmem70	NM_026392	transmembrane protein 70	6.092	5.90336	5.95453	6.16881	6.17657	5.99585	6.07636	6.08783	6.127	6.25621	5.91093	6.14575	5.87827	5.98771	6.02379	5.98609	6.0795	6.2229	6.11736	6.01469	6.01682	6.09235	6.24061
TC0100000102.mm.1	2.24443	2.18586	2.36811	2.27102	2.26595	NONMMUT000252	NONMMUT000252	NA	2.27884	2.33264	1.96934	2.24373	2.39761	2.22785	2.24187	2.18418	2.08955	2.27455	2.51695	2.19383	2.4871	2.26746	2.28864	2.07092	2.31989	2.40822	2.11544	2.50962	2.17656	2.26242	2.26568
TC0100000103.mm.1	7.98549	7.79394	7.79645	7.73244	7.92235	Ly96	NM_001159711	lymphocyte antigen 96	7.674	8.09489	8.52561	7.77424	7.85873	7.86113	7.78914	7.73329	7.7922	7.70403	7.80012	7.84391	7.83774	7.67535	7.7966	7.32102	7.92302	7.94621	7.93082	7.82878	8.36528	7.87183	7.61501
TC0100000104.mm.1	4.72837	4.58446	4.50535	4.6483	4.57985	NONMMUT000258	NONMMUT000258	NA	4.70626	4.8281	4.55659	4.76668	4.78422	4.50833	4.64269	4.5999	4.58692	4.60871	4.40558	4.53659	4.47053	4.64426	4.82442	4.62455	4.61725	4.53101	4.71525	4.71612	4.4952	4.34061	4.63208
TC0100000105.mm.1	2.39316	2.32842	2.29119	2.44471	2.42012	NONMMUT000259	NONMMUT000259	NA	2.47263	2.36168	2.29191	2.49514	2.34444	2.23813	2.45223	2.36517	2.25815	2.33409	2.27444	2.42754	2.12869	2.41984	2.3424	2.62565	2.44272	2.39292	2.4342	2.2761	2.42937	2.51847	2.44246
TC0100000106.mm.1	1.26717	1.20245	1.3313	1.24147	1.27839	KnowTID_00000019	KnowTID_00000019	NA	1.13686	1.4735	1.27461	1.26374	1.18715	1.37956	1.21979	0.954727	1.25572	1.28486	1.38725	1.25668	1.39641	1.14718	1.29163	1.25995	1.3172	1.1914	1.19478	1.21698	1.41785	1.38902	1.17333
TC0100000107.mm.1	2.84531	2.81182	2.91654	2.76125	2.88032	NONMMUT000261	NONMMUT000261	NA	2.74428	2.79327	2.82631	3.11009	2.7526	2.81405	2.78714	2.68249	2.9636	2.93392	2.95397	2.85842	2.91983	3.00472	2.77613	2.77562	2.71082	2.53895	2.84776	2.84075	3.06684	2.77757	2.86868
TC0100000108.mm.1	2.10674	2.00307	2.08796	2.08866	2.05615	KnowTID_00000020	KnowTID_00000020	NA	1.9459	2.0925	2.25251	2.21728	2.02552	1.96675	1.88428	1.96973	2.19154	2.07357	1.94108	2.01627	2.3209	2.01428	2.03805	2.21363	2.10201	2.07531	2.07521	2.08063	2.06754	2.04587	2.0115
TC0100000109.mm.1	2.3027	2.16279	2.22038	2.69402	2.67482	Gdap1	NM_010267	ganglioside-induced differentiation-associated-protein 1	2.10511	2.15906	2.77562	2.14067	2.33304	2.22142	2.20439	2.14868	2.07665	2.30366	2.1753	2.19229	2.21027	2.0506	2.08209	5.01103	2.2078	2.11859	2.13101	2.17378	3.59568	3.26025	2.21338
TC0100000110.mm.1	1.42724	1.40921	1.449	1.49866	1.53958	KnowTID_00000021	KnowTID_00000021	NA	1.36583	1.43082	1.40156	1.52227	1.41574	1.48428	1.45315	1.36816	1.33124	1.34371	1.32019	1.56624	1.56584	1.59501	1.35127	1.51939	1.54083	1.4868	1.55707	1.66264	1.49449	1.47641	1.50728
TC0100000111.mm.1	3.71741	3.723	3.85776	3.7713	3.67301	Gm25166	ENSMUST00000158909	predicted gene, 25166	3.59842	3.60001	3.81663	3.86548	3.70654	3.7504	3.69037	3.7147	3.73652	3.83176	3.93522	3.82798	3.83606	4.14185	3.76315	3.80315	3.61058	3.53776	3.79661	3.91779	3.63771	3.39622	3.61674
TC0100000112.mm.1	9.7184	9.77406	9.85255	9.73149	9.5173	Pi15	NM_053191	peptidase inhibitor 15	9.77369	9.83841	9.48101	9.736	9.7629	9.57434	9.80434	9.80187	9.91568	9.853	9.81271	9.86843	9.87606	9.71249	9.81776	9.67289	9.72138	9.73291	9.71689	9.59963	9.13668	9.55356	9.57973
TC0100000113.mm.1	5.16267	5.52333	5.90495	5.39717	5.60968	Crispld1	NM_031402	cysteine-rich secretory protein LCCL domain containing 1	5.64292	5.21724	4.9098	5.21545	4.82797	5.62136	5.37455	5.44254	5.65486	5.96393	5.96207	5.82879	5.86502	4.88017	5.57503	5.80435	5.55871	5.16758	5.85103	5.5734	5.2567	5.84124	5.52606
TC0100000114.mm.1	1.26347	1.27267	1.34127	1.29894	1.36821	NONMMUT000274	NONMMUT000274	NA	1.27916	1.1488	1.47177	1.27359	1.14402	1.17704	1.29198	1.29857	1.32311	1.43652	1.22067	1.29669	1.41119	1.27321	1.28515	1.20397	1.27154	1.46085	1.49588	1.31578	1.35995	1.33661	1.33284
TC0100000115.mm.1	1.86285	1.83347	1.88887	1.81614	1.85908	Tfap2d	NM_153154	transcription factor AP-2, delta	1.87905	1.7973	1.8799	1.8885	1.86951	1.81396	1.80641	1.83015	1.88335	1.8673	1.96765	1.87138	1.84914	1.80258	1.76609	1.85284	1.83565	1.82355	1.84333	1.91066	1.87499	1.82914	1.83727
TC0100000116.mm.1	2.49003	2.38468	2.49755	2.84873	2.80105	Tfap2b	NM_001025305	transcription factor AP-2 beta	2.42701	2.32287	2.78705	2.26264	2.65057	2.37976	2.37968	2.3256	2.4537	2.29784	2.40428	2.44895	2.83914	2.34875	2.45536	4.69892	2.3697	2.37092	2.36959	2.42049	3.49693	3.2895	2.42874
TC0100000117.mm.1	1.40388	1.35473	1.41984	1.40777	1.35792	NONMMUT000282	NONMMUT000282	NA	1.46336	1.33133	1.45759	1.32975	1.43734	1.56691	1.17223	1.18539	1.49441	1.41688	1.42411	1.48804	1.35033	1.38192	1.27841	1.58007	1.43753	1.36094	1.31326	1.35486	1.2757	1.47475	1.37101
TC0100000118.mm.1	6.86886	6.65327	6.57232	6.65303	6.70527	AB353040	uc029qnc.1	NA	6.25752	7.12572	6.91153	6.87412	7.17542	6.30518	7.10646	6.40564	6.79578	6.50161	6.74368	6.55469	6.48931	6.89607	6.69777	6.53625	6.61185	6.52321	6.62489	6.68884	6.79937	6.51122	6.90202
TC0100000119.mm.1	1.74051	1.67148	1.74031	1.74881	1.74355	NONMMUT000285	NONMMUT000285	NA	1.57001	1.86907	1.67164	1.75015	1.84168	1.72883	1.66294	1.50568	1.78848	1.75204	1.59532	1.96876	1.64513	1.718	1.6526	1.80337	1.69029	1.87978	1.91957	1.55649	1.73979	1.65694	1.84493
TC0100000120.mm.1	1.37207	1.3461	1.37288	1.29256	1.3558	KnowTID_00000023	KnowTID_00000023	NA	1.25734	1.30758	1.28343	1.51655	1.49544	1.2959	1.18238	1.65103	1.25507	1.28797	1.44004	1.3654	1.39812	1.26225	1.2588	1.14219	1.39026	1.40932	1.42923	1.41693	1.35434	1.28851	1.28997
TC0100000121.mm.1	2.05808	2.01665	2.07667	1.99648	2.03557	NONMMUT000287	NONMMUT000287	NA	2.03341	2.04975	2.00229	2.08441	2.12053	1.97854	2.07118	2.0862	1.93067	1.90987	2.12411	2.02702	2.24569	2.05281	2.05802	2.05455	1.89946	1.91757	2.05117	2.116	1.91071	1.99515	2.10482
TC0100000122.mm.1	2.29807	2.31886	2.45483	2.39315	2.37966	NONMMUT000289	NONMMUT000289	NA	2.21041	2.33539	2.27201	2.33163	2.3409	2.3497	2.09956	2.37727	2.4489	2.31406	2.4213	2.59908	2.48489	2.44958	2.24427	2.36143	2.47181	2.43865	2.28459	2.45672	2.40772	2.36321	2.38605
TC0100000123.mm.1	2.25218	2.25595	2.30926	2.31652	2.33643	NONMMUT000291	NONMMUT000291	NA	2.22314	2.27878	2.31715	2.27494	2.16692	2.34561	2.17703	2.26285	2.23831	2.13716	2.38039	2.31611	2.40338	2.3463	2.23349	2.20734	2.43256	2.3629	2.35371	2.45095	2.32685	2.31675	2.2339
TC0100000124.mm.1	1.41576	1.41805	1.44131	1.42485	1.42392	4930486I03Rik	NR_045734	RIKEN cDNA 4930486I03 gene	1.45824	1.35083	1.37207	1.45432	1.44337	1.42616	1.30705	1.42717	1.51182	1.36745	1.357	1.33793	1.70284	1.4401	1.48631	1.40754	1.42669	1.36358	1.52673	1.39052	1.33547	1.45081	1.41606
TC0100000125.mm.1	1.62499	1.71201	1.72366	1.67419	1.62966	Mir206	NR_029593	microRNA 206	1.71263	1.5469	1.58924	1.61665	1.65954	1.71579	1.642	1.66253	1.82774	1.59798	1.79038	1.76978	1.73648	1.75741	1.63213	1.77723	1.55026	1.65393	1.53564	1.65941	1.66345	1.70423	1.58558
TC0100000126.mm.1	2.88615	2.95445	2.96516	3.00703	3.03394	KnowTID_00000024	KnowTID_00000024	NA	2.90839	2.92091	2.8205	2.72828	3.05265	2.92956	2.94853	2.97831	2.96142	2.81232	3.06422	2.81008	3.174	3.09787	3.0396	2.89142	2.96694	3.03933	3.02335	2.89629	3.17211	3.03587	3.04207
TC0100000127.mm.1	2.65523	2.71196	2.74253	2.70174	2.72261	Il17a	NM_010552	interleukin 17A	2.73568	2.46262	2.72014	2.57144	2.78625	2.85675	2.67952	2.54408	2.76747	2.68426	2.82914	2.49481	2.96193	2.84507	2.67456	2.82078	2.58417	2.5841	2.59879	2.84796	2.72898	2.70696	2.73035
TC0100000128.mm.1	2.76937	2.7562	2.91821	2.75035	2.86478	AK205147	uc007alb.1	NA	2.79279	2.85093	2.83194	2.71237	2.65883	2.96918	2.67341	2.67551	2.70672	2.84973	3.03007	2.82367	2.96935	2.84742	2.84477	2.55787	2.68322	2.81846	3.11233	2.88583	3.11933	2.54618	2.66024
TC0100000129.mm.1	4.09259	4.1121	4.13565	4.16049	4.02016	Paqr8	NM_028829	progestin and adipoQ receptor family member VIII	4.20836	4.13561	3.97595	4.13178	4.01126	4.07905	4.08039	4.17082	4.11815	4.25503	4.12075	4.11014	4.05669	4.18631	4.11105	4.2015	4.19935	4.10425	4.09222	3.99842	3.98969	3.99007	4.03042
TC0100000130.mm.1	2.0538	2.14984	2.16431	2.07779	2.11251	NONMMUT000307	NONMMUT000307	NA	2.04487	2.13689	1.97508	2.10287	2.00928	2.07014	2.13231	2.17658	2.22032	2.06751	2.27518	2.12527	2.18929	1.98456	2.08099	2.3926	2.01002	1.92076	1.99679	2.27276	1.83372	2.02863	2.43064
TC0100000131.mm.1	4.0862	4.29503	4.38733	4.2768	4.33932	Efhc1	NM_027974	EF-hand domain (C-terminal) containing 1	4.33776	3.95677	4.03358	3.99937	4.10354	4.27242	4.21409	4.47336	4.22026	4.50188	4.30572	4.47514	4.26658	4.16921	4.36506	4.42656	4.49389	3.9293	4.37134	4.33756	4.39835	4.33974	4.24963
TC0100000132.mm.1	3.48672	3.59633	3.65882	3.56858	3.64845	KnowTID_00000025	KnowTID_00000025	NA	3.63952	3.27925	3.65083	3.40867	3.45534	3.62488	3.54908	3.55777	3.65361	3.56684	3.61819	3.47582	3.97441	3.58123	3.6131	3.56666	3.57564	3.5063	3.63859	3.58511	3.67197	3.75793	3.58866
TC0100000133.mm.1	4.94152	5.10454	5.07171	4.99651	5.15282	Tmem14a	NM_029398	transmembrane protein 14A	5.12255	4.75184	5.00672	4.97258	4.85389	5.15063	5.10584	4.92846	5.23322	5.14784	5.00122	5.08405	5.05371	5.02503	5.17585	5.13468	5.09453	4.55247	5.07662	5.11343	5.33462	5.15175	5.08767
TC0100000134.mm.1	1.99697	1.95161	1.81374	1.87261	1.94741	KnowTID_00000026	KnowTID_00000026	NA	2.12483	1.94853	1.78034	2.09168	2.03947	1.96602	2.01506	1.88117	1.94419	1.75698	1.75855	1.76906	1.97036	1.93702	1.79054	1.86907	1.91306	1.85338	1.80009	1.94542	2.07752	1.95639	1.95766
TC0100000135.mm.1	4.33878	4.46591	3.91616	4.48705	4.3229	Gsta3	NM_001077353	glutathione S-transferase, alpha 3	4.07822	3.96491	4.80293	4.36832	4.47952	4.58432	4.75333	3.95626	4.56973	4.08051	3.79097	4.09333	3.69984	4.5485	4.61399	4.39718	4.4105	4.46507	4.17309	3.95966	4.7583	3.93239	4.79106
TC0100000136.mm.1	4.88948	4.93015	5.10015	5.00639	5.05415	LOC101056100	ENSMUST00000178379	centrin-4-like	5.03002	4.56415	5.05508	4.99928	4.79888	4.88685	4.96517	4.64242	5.22615	5.04229	4.94552	5.25055	5.16224	4.87677	5.14542	5.0869	5.28179	4.64104	5.05686	4.84405	5.51435	5.02835	4.82712
TC0100000137.mm.1	3.45348	3.47291	3.51142	3.54022	3.50535	Khdc1a	NM_183322	KH domain containing 1A	3.53181	3.48274	3.52418	3.4126	3.31606	3.64765	3.39924	3.48713	3.35761	3.39297	3.56151	3.47525	3.61597	3.50833	3.51381	3.51222	3.5837	3.58306	3.4137	3.55049	3.45589	3.60992	3.49675
TC0100000138.mm.1	2.55836	2.60859	2.70343	2.67956	2.66929	Gm16329	ENSMUST00000148174	predicted gene 16329	2.65416	2.61211	2.6109	2.48971	2.4249	2.77697	2.54515	2.64046	2.47178	2.74339	2.57047	2.72136	2.77851	2.68939	2.70281	2.71401	2.63769	2.6539	2.4903	2.94241	2.73058	2.69381	2.48933
TC0100000139.mm.1	1.58566	1.59296	1.66565	1.65889	1.59451	Gm16327	ENSMUST00000137146	predicted gene 16327	1.75336	1.61548	1.4125	1.6203	1.52666	1.62545	1.61171	1.58685	1.54785	1.72807	1.61418	1.6532	1.66716	1.65146	1.7992	1.60845	1.54109	1.69427	1.68286	1.74152	1.42925	1.54599	1.57291
TC0100000140.mm.1	1.96953	1.96677	2.02037	1.93983	1.97907	Khdc1c	NM_001033904	KH domain containing 1C	1.97125	1.91471	1.97106	1.95876	2.03188	1.96965	1.83625	2.01447	2.04672	2.02056	1.96104	1.92257	2.17731	2.06663	1.96011	1.75733	1.85513	2.05996	1.9552	2.08927	1.90238	2.07862	1.86988
TC0100000141.mm.1	2.41723	2.34137	2.45516	2.41386	2.47731	Gm2709	ENSMUST00000142979	predicted gene 2709	2.57612	2.25009	2.36496	2.29046	2.60454	2.36657	2.18441	2.3788	2.43571	2.5319	2.33074	2.30822	2.64979	2.34401	2.45757	2.52904	2.38677	2.35194	2.36457	2.55242	2.74362	2.33787	2.38809
TC0100000142.mm.1	1.90772	2.03927	1.99371	1.9196	1.91112	Gm16533	ENSMUST00000140035	predited gene 16533	2.10289	1.83784	1.79563	1.94166	1.86056	2.10228	2.10121	2.05308	1.90053	2.02723	1.95404	2.01367	1.9799	1.951	1.99737	1.93776	1.73725	1.9746	2.01649	1.95795	1.88729	1.69226	2.00162
TC0100000143.mm.1	1.83389	1.83926	1.69997	1.73038	1.90242	Khdc1b	NM_001113187	KH domain containing 1B	1.96127	1.69416	1.8748	1.71834	1.9209	1.92442	1.76852	1.79212	1.87199	1.66491	1.68244	1.4975	1.95503	1.59966	1.79198	1.75704	1.79561	1.7076	1.63222	2.00761	2.15418	1.75534	1.96276
TC0100000144.mm.1	2.50346	2.72468	2.71387	2.6161	2.73723	Gm16328	ENSMUST00000126985	predicted gene 16328	2.53904	2.49896	2.47169	2.51901	2.48862	2.78298	2.69867	2.56292	2.85413	2.63636	2.72272	2.48654	3.00987	2.60071	2.71061	2.61086	2.41499	2.74331	2.49267	2.97231	2.71133	2.79028	2.71956
TC0100000145.mm.1	1.74033	1.72083	1.85556	1.74323	1.80697	NONMMUT000324	NONMMUT000324	NA	1.89118	1.62974	1.63164	1.6936	1.85549	1.84669	1.62023	1.6981	1.7183	1.75945	1.9287	1.92644	1.80766	1.68752	1.76888	1.81312	1.74977	1.69688	1.75902	1.80052	1.77749	1.86215	1.83569
TC0100000146.mm.1	1.51388	1.52054	1.4847	1.4688	1.49897	NONMMUT000333	NONMMUT000333	NA	1.35779	1.50837	1.50985	1.70165	1.49174	1.25454	1.42867	1.53727	1.8617	1.54383	1.42482	1.46968	1.50046	1.52986	1.50178	1.41913	1.65429	1.23897	1.71326	1.48069	1.59238	1.36197	1.34653
TC0100000147.mm.1	3.34774	3.40264	3.46151	3.46512	3.39547	Gm26580	ENSMUST00000181002	predicted gene, 26580	3.44824	3.40985	3.28105	3.37431	3.22526	3.52763	3.33182	3.37883	3.37228	3.36211	3.50685	3.36732	3.60975	3.49094	3.44294	3.52401	3.46001	3.40769	3.34141	3.54433	3.45509	3.23781	3.39873
TC0100000148.mm.1	1.56084	1.6352	1.6906	1.65583	1.59072	Gm26866	ENSMUST00000180414	predicted gene, 26866	1.53982	1.60393	1.41025	1.62643	1.62378	1.58268	1.70837	1.70527	1.5445	1.55401	1.6161	1.73305	1.85922	1.77634	1.93608	1.51419	1.4656	1.58693	1.6813	1.71065	1.62258	1.43961	1.49944
TC0100000149.mm.1	3.51856	3.29638	3.34672	3.49858	3.43156	NONMMUT000342	NONMMUT000342	NA	3.45058	3.54735	3.58629	3.4739	3.53469	3.24411	3.32799	3.29775	3.31567	3.30886	3.38443	3.40319	3.29039	3.5776	3.45882	3.54882	3.51169	3.39594	3.43155	3.42027	3.45513	3.43001	3.42084
TC0100000150.mm.1	1.28626	1.25537	1.29978	1.28626	1.20868	NONMMUT000345	NONMMUT000345	NA	1.31043	1.34911	1.22472	1.2088	1.33826	1.253	1.2598	1.18084	1.32786	1.15927	1.20514	1.49956	1.33515	1.2132	1.24328	1.26768	1.38065	1.32651	1.21435	1.16252	1.26585	1.16872	1.23194
TC0100000151.mm.1	1.50808	1.5004	1.4802	1.48245	1.58247	Gm24176	ENSMUST00000158928	predicted gene, 24176	1.44053	1.50244	1.64341	1.45631	1.49771	1.51224	1.48435	1.577	1.42801	1.2567	1.45442	1.57339	1.63631	1.63504	1.53331	1.18218	1.50786	1.55387	1.50145	1.64866	1.70366	1.39523	1.66334
TC0100000152.mm.1	5.27213	5.39823	5.49665	5.15527	5.21776	KnowTID_00000027	KnowTID_00000027	NA	5.02757	5.22058	5.1077	5.66978	5.33503	4.79302	5.6285	5.45796	5.71345	5.2822	5.63218	5.55856	5.51366	5.43307	5.13087	5.21971	5.12445	4.86827	5.39691	4.93814	5.24665	4.95154	5.55558
TC0100000153.mm.1	5.86676	5.9235	6.04747	5.79999	5.78897	NONMMUT000348	NONMMUT000348	NA	5.52767	5.84566	5.85703	6.16335	5.94009	5.43611	5.91454	6.05097	6.29238	5.87129	6.05012	6.12394	6.14455	5.84447	5.76859	5.89171	5.88545	5.60975	5.82273	5.59059	5.80608	5.61941	6.10605
TC0100000154.mm.1	3.9855	4.13052	4.23808	3.9451	3.90113	Mir30a	NR_029533	microRNA 30a	3.6086	4.01006	3.72875	4.09425	4.48582	3.56212	4.08886	4.29267	4.57843	3.83512	4.53077	4.31339	4.27302	4.00262	3.90549	3.90169	3.98969	3.92603	4.18733	3.91558	3.72521	4.04221	3.63533
TC0100000155.mm.1	6.15338	6.36922	6.42311	6.1956	6.21201	KnowTID_00000028	KnowTID_00000028	NA	5.8406	6.05724	6.07268	6.46744	6.32891	5.87215	6.46291	6.55724	6.58459	6.23846	6.59136	6.42137	6.44124	6.3602	6.40929	6.31469	6.15721	5.73663	6.48137	6.11781	6.12927	5.96389	6.36772
TC0100000156.mm.1	5.15255	5.11164	5.16276	5.14338	5.20156	Mir30c-2	NR_029717	microRNA 30c-2	5.02354	4.92725	5.33785	5.27573	5.19839	4.78402	5.07044	4.99486	5.59725	4.92105	5.14066	5.4714	5.11794	5.15931	5.18804	5.1833	5.22396	4.96228	5.16951	5.12205	5.12971	5.17263	5.41389
TC0100000157.mm.1	2.49062	2.49453	2.57289	2.58038	2.58728	Gm7784	ENSMUST00000180769	predicted gene 7784	2.63583	2.45864	2.58571	2.35694	2.41599	2.5952	2.42529	2.52419	2.43342	2.52387	2.5509	2.56235	2.65444	2.55942	2.59285	2.64877	2.63434	2.46654	2.6069	2.59668	2.5237	2.65637	2.55273
TC0100000158.mm.1	2.53454	2.55418	2.47095	2.65707	2.59087	NONMMUT000358	NONMMUT000358	NA	2.42105	2.57755	2.52944	2.5772	2.56743	2.48339	2.5661	2.50763	2.65958	2.39983	2.44193	2.41268	2.62935	2.92542	2.71665	2.50314	2.52442	2.61573	2.52694	2.79945	2.51557	2.59885	2.51354
TC0100000159.mm.1	3.71488	3.72563	3.80671	3.77229	3.77894	B3gat2	NM_172124	beta-1,3-glucuronyltransferase 2 (glucuronosyltransferase S)	3.74028	3.5417	3.78507	3.7601	3.74722	3.71382	3.76124	3.68828	3.73918	3.74771	3.83261	3.80563	3.84091	3.77188	3.71962	3.80191	3.77209	3.79595	3.6793	3.90312	3.7985	3.79561	3.71815
TC0100000160.mm.1	2.93848	2.99833	3.0378	3.03163	3.02908	ENSMUSG00000053484	ENSMUST00000181961	NA	3.14862	2.8379	3.07643	2.74639	2.88307	3.11852	2.96564	3.11193	2.79722	2.94518	3.10661	2.9647	3.13471	2.9143	2.96552	2.89606	3.2485	3.1338	2.90067	3.06091	2.96384	3.2002	3.01977
TC0100000161.mm.1	1.93784	1.92297	2.18193	1.9709	1.85104	NONMMUT000364	NONMMUT000364	NA	2.06853	1.87992	1.75411	1.96444	2.02222	2.02068	1.75325	2.04473	1.87324	2.14233	2.35367	2.15776	2.07397	2.26666	2.04559	1.90962	1.80295	1.82969	1.83863	1.72528	1.91032	1.86465	1.9163
TC0100000162.mm.1	1.47617	1.43563	1.6298	1.61882	1.55807	KnowTID_00000029	KnowTID_00000029	NA	1.48375	1.6389	1.33329	1.62009	1.30484	1.44006	1.52258	1.41154	1.36832	1.61836	1.51049	1.7042	1.68616	1.54777	1.64679	1.85716	1.56829	1.4741	1.37976	1.54347	1.71535	1.60525	1.54655
TC0100000163.mm.1	1.72044	1.67298	1.70129	1.68842	1.67825	Gm26607	ENSMUST00000180661	predicted gene, 26607	1.77774	1.71211	1.63839	1.76698	1.70698	1.61719	1.61515	1.63632	1.82327	1.71085	1.69548	1.70906	1.68977	1.61517	1.75142	1.7289	1.56707	1.77953	1.72783	1.59736	1.64675	1.70777	1.71155
TC0100000164.mm.1	3.97663	3.95714	4.07403	4.0282	4.06151	Col9a1	NM_007740	collagen, type IX, alpha 1	4.04467	3.96052	4.00396	3.92298	3.95104	3.98693	3.97146	4.02623	3.84395	3.96454	4.09073	3.99202	4.24881	4.07753	4.00161	4.06191	3.99352	4.00643	3.94799	4.22192	4.07372	4.06346	4.00047
TC0100000165.mm.1	1.31801	1.36391	1.35669	1.4375	1.36952	NONMMUT000370	NONMMUT000370	NA	1.34957	1.35381	1.44171	1.32355	1.12144	1.33428	1.34612	1.34605	1.42919	1.21108	1.51106	1.3587	1.34592	1.5007	1.49169	1.39383	1.34936	1.45192	1.26932	1.48426	1.47714	1.25435	1.36255
TC0100000166.mm.1	1.47692	1.39925	1.50135	1.44337	1.38029	NONMMUT000371	NONMMUT000371	NA	1.39105	1.5726	1.44065	1.54214	1.43819	1.50969	1.46319	1.40917	1.21494	1.40037	1.5694	1.5536	1.48203	1.48596	1.35215	1.46045	1.44994	1.46837	1.29687	1.42875	1.46182	1.28737	1.42665
TC0100000167.mm.1	3.62119	3.68302	3.7699	3.82359	3.74859	NONMMUT000374	NONMMUT000374	NA	3.88722	3.43163	3.58692	3.6295	3.57068	3.78342	3.73493	3.46883	3.74489	3.718	3.73027	3.56125	4.07007	3.78587	3.76898	3.74192	3.942	3.87917	3.71091	3.75196	3.74044	3.87227	3.66738
TC0100000168.mm.1	10.1911	9.87493	10.0918	10.2236	10.1104	NONMMUT000375	NONMMUT000375	NA	10.1592	10.1201	10.1386	10.2656	10.2723	9.95214	9.85915	9.87675	9.81167	10.0694	10.1946	10.1816	9.92153	10.4023	10.1835	10.2678	10.1791	10.0856	10.166	10.1523	10.1458	10.1008	9.98704
TC0100000169.mm.1	10.3256	10.0568	10.2419	10.3383	10.2673	KnowTID_00000030	KnowTID_00000030	NA	10.2873	10.2571	10.231	10.3896	10.4632	10.072	9.9746	10.0634	10.1174	10.2675	10.3545	10.3732	9.97244	10.5304	10.2797	10.3987	10.3109	10.1716	10.3432	10.2842	10.2476	10.3263	10.1351
TC0100000170.mm.1	9.6519	9.2873	9.52408	9.72907	9.55326	KnowTID_00000031	KnowTID_00000031	NA	9.62871	9.62477	9.65463	9.56313	9.78826	9.34667	9.28405	9.34563	9.17286	9.46299	9.64278	9.65151	9.33904	9.95832	9.74564	9.73886	9.62124	9.58129	9.53707	9.70603	9.65474	9.52561	9.34285
TC0100000171.mm.1	7.85315	7.78552	7.82272	7.8198	7.71919	Lmbrd1	NM_026719	LMBR1 domain containing 1	7.88285	7.77419	7.89616	7.82819	7.88436	7.80989	7.71854	7.78102	7.83263	7.86148	7.79473	7.83591	7.79878	7.85612	7.79907	7.82428	7.81782	7.80172	7.83952	7.6421	7.69115	7.74788	7.67531
TC0100000172.mm.1	4.17808	4.12136	3.93106	4.1425	3.79528	NONMMUT000381	NONMMUT000381	NA	3.97802	4.45111	4.26443	4.1933	4.00355	4.04364	4.25283	4.05472	4.13425	4.15976	3.8593	3.89742	3.80776	4.27314	4.38074	4.07687	4.20853	3.77324	3.75473	3.9637	3.55716	3.62411	4.0767
TC0100000173.mm.1	10.3997	10.0546	9.98659	10.3041	9.97034	KnowTID_00000032	KnowTID_00000032	NA	9.9796	10.4733	10.3684	10.5614	10.6161	10.0276	10.1697	10.1165	9.90449	9.88924	10.0525	10.154	9.85063	10.4102	10.1671	10.1186	10.1787	10.6458	10.0457	9.73771	10.0099	9.9806	10.0777
TC0100000174.mm.1	2.98457	2.89199	3.02877	3.0196	2.94768	Gm15702	ENSMUST00000119680	predicted gene 15702	3.13991	2.77929	3.11248	2.97717	2.91398	3.10844	2.98928	2.8094	2.66082	3.1687	3.06314	2.89459	2.98864	2.90892	3.13106	3.09659	3.01963	2.94182	2.88711	3.13251	2.94202	2.94853	2.82824
TC0100000175.mm.1	1.23114	1.24546	1.27978	1.36861	1.26616	NONMMUT000390	NONMMUT000390	NA	1.23249	1.21773	1.09211	1.20423	1.40912	1.08477	1.35436	1.22186	1.32087	1.30028	1.24538	1.40024	1.1732	1.39323	1.32254	1.39486	1.25889	1.47353	1.34975	1.38307	1.00749	1.47931	1.11116
TC0100000176.mm.1	1.22972	1.28004	1.28631	1.28476	1.2304	Gm25294	ENSMUST00000122791	predicted gene, 25294	1.117	1.34187	1.20909	1.21606	1.26457	1.32706	1.22221	1.18416	1.38672	1.26469	1.28616	1.28121	1.31317	1.31796	1.21103	1.13025	1.45077	1.31378	1.28819	1.28511	1.18798	1.14443	1.24627
TC0100000177.mm.1	1.69256	1.61114	1.82842	1.72165	1.78151	Gm9884	ENSMUST00000064487	predicted gene 9884	1.81568	1.7052	1.58022	1.70014	1.66156	1.75585	1.63158	1.61268	1.44446	1.80065	1.65296	1.70976	2.15033	1.87134	1.54421	1.80482	1.67939	1.70847	1.68053	1.8897	1.82698	1.73418	1.77616
TC0100000178.mm.1	6.84839	6.48705	6.56824	6.58478	6.65098	AB349959	uc011wit.1	NA	6.16975	7.08239	7.20515	6.9814	6.80327	6.37616	6.84069	6.17708	6.55427	6.20432	6.99647	6.61518	6.457	6.99884	6.92481	6.31464	6.13731	6.54831	6.5063	6.80101	6.70441	6.54741	6.69576
TC0100000179.mm.1	1.03506	1.05257	1.13796	1.06796	1.07562	Gm24064	ENSMUST00000157486	predicted gene, 24064	0.994249	1.16562	1.04073	0.946211	1.02851	0.999274	1.01711	1.06188	1.13203	1.07709	1.07846	1.16926	1.22702	1.04981	1.2273	0.927495	1.06724	1.06795	0.984142	1.05099	1.15349	1.04049	1.14898
TC0100000180.mm.1	1.38106	1.41236	1.40628	1.42038	1.47322	NONMMUT000413	NONMMUT000413	NA	1.3534	1.30859	1.31126	1.48817	1.44386	1.45605	1.47797	1.34075	1.37466	1.38079	1.46148	1.35496	1.4279	1.41395	1.42049	1.37948	1.46602	1.42197	1.46234	1.49904	1.4978	1.48677	1.42017
TC0100000181.mm.1	1.18746	1.12385	1.24365	1.20829	1.22233	NONMMUT000417	NONMMUT000417	NA	1.2811	1.17517	1.22796	1.06306	1.19	1.06714	0.976726	1.27511	1.17642	1.29017	1.06847	1.21559	1.40036	1.14986	1.1308	1.24196	1.2047	1.31411	1.19343	1.17192	1.258	1.22423	1.26407
TC0100000182.mm.1	1.11339	1.16143	1.1736	1.19845	1.14123	Gm5524	XR_104583	predicted gene 5524	1.19884	1.07835	1.10942	1.13593	1.0444	1.13604	1.0638	1.33148	1.11439	1.17097	1.18108	1.23056	1.11178	1.13934	1.2103	1.21239	1.2253	1.20491	1.16264	1.14171	1.11497	1.19391	1.09295
TC0100000183.mm.1	1.28811	1.33391	1.33693	1.35419	1.25692	NONMMUT000423	NONMMUT000423	NA	1.30649	1.23022	1.12743	1.39354	1.38287	1.43956	1.25618	1.32235	1.31755	1.25471	1.4318	1.36511	1.2961	1.25931	1.42163	1.4073	1.28626	1.39643	1.30343	1.33046	1.1352	1.33187	1.18364
TC0100000184.mm.1	2.96248	3.04271	2.9089	2.9656	3.03369	Gm6462	XM_888439	predicted gene 6462	2.93891	2.79329	3.1206	2.98954	2.97008	3.25562	3.14456	2.95188	2.81878	2.94323	2.90368	3.00362	2.78508	2.84795	2.74099	2.99578	3.04801	3.19529	3.0265	2.89342	2.96353	3.13279	3.15222
TC0100000185.mm.1	1.04935	1.06287	1.04684	1.07034	1.02699	Gm22679	ENSMUST00000116975	predicted gene, 22679	0.981559	1.10469	1.01482	1.14196	1.00373	1.06516	1.06547	1.05447	1.0664	1.04297	1.13833	0.971018	1.03505	1.09489	1.07935	1.09903	1.06278	1.01567	0.925911	1.15291	1.03079	1.01089	1.01447
TC0100000186.mm.1	2.43933	2.33944	2.5025	2.49646	2.43051	Mir6342	NR_105760	microRNA mir-6342	2.59226	2.47624	2.41369	2.26367	2.45082	2.37873	2.30918	2.47231	2.19754	2.3661	2.55202	2.60281	2.48909	2.70775	2.51968	2.37893	2.34611	2.52984	2.66045	2.50932	2.33145	2.41673	2.23457
TC0100000187.mm.1	6.79495	6.70869	6.79014	6.85323	6.83701	Gm23771	ENSMUST00000178702	predicted gene, 23771	6.84471	6.77379	6.77518	6.84822	6.73284	6.61481	6.86786	6.791	6.56108	6.64431	6.89716	6.8327	6.78638	6.82092	6.79898	6.92894	6.8851	6.83221	6.665	6.92001	6.84176	6.7803	6.978
TC0100000188.mm.1	1.68992	1.52969	1.67343	1.55918	1.58685	KnowTID_00000035	KnowTID_00000035	NA	1.77322	1.62046	1.62509	1.56649	1.86436	1.38454	1.38682	1.66586	1.68154	1.60056	1.61805	1.61392	1.86118	1.62417	1.50941	1.49429	1.64313	1.52487	1.57336	1.63082	1.62283	1.43772	1.66954
TC0100000189.mm.1	6.22128	6.45711	6.21397	6.37208	6.34273	KnowTID_00000036	KnowTID_00000036	NA	6.58296	6.34712	6.10638	6.13697	5.93298	6.4896	6.43185	6.53415	6.37286	6.39021	6.1277	6.1452	6.19274	6.2406	6.62066	6.46833	6.53997	5.99086	6.51398	6.53579	6.36887	6.09466	6.20033
TC0100000190.mm.1	1.52329	1.45099	1.52587	1.43164	1.41003	KnowTID_00000037	KnowTID_00000037	NA	1.4884	1.50942	1.48063	1.55097	1.58704	1.34406	1.46176	1.4353	1.56284	1.4883	1.61745	1.53133	1.46642	1.2787	1.45611	1.45685	1.56144	1.40509	1.46328	1.50295	1.1465	1.54402	1.39342
TC0100000191.mm.1	3.44915	3.36006	3.4275	3.46485	3.47382	KnowTID_00000038	KnowTID_00000038	NA	3.4854	3.28233	3.63037	3.03553	3.81212	3.17746	3.51215	3.38478	3.36588	3.32705	3.41799	3.26336	3.7016	3.49364	3.54739	3.44561	3.49019	3.34742	3.41982	3.59277	3.47933	3.45013	3.42706
TC0100000192.mm.1	2.3054	2.16864	2.38217	2.3087	2.24661	NONMMUT000449	NONMMUT000449	NA	2.2872	2.30716	2.24332	2.38941	2.29988	2.33232	2.20015	2.14173	2.00035	2.26329	2.57238	2.34512	2.34791	2.34819	2.11083	2.2965	2.52974	2.25827	2.21043	2.33562	2.27754	2.35198	2.05746
TC0100000193.mm.1	2.53784	2.57554	2.59676	2.56488	2.51262	Lgsn	NM_153601	lengsin, lens protein with glutamine synthetase domain	2.56294	2.56173	2.60318	2.48802	2.4733	2.52359	2.56976	2.6568	2.55203	2.47904	2.57907	2.66499	2.66395	2.57531	2.62131	2.55623	2.56512	2.50643	2.47444	2.52082	2.54422	2.53008	2.49355
TC0100000194.mm.1	1.53396	1.55658	1.52631	1.51865	1.55685	Pih1d3	NM_029062	PIH1 domain containing 3	1.65096	1.3748	1.5628	1.41432	1.66693	1.5764	1.53134	1.44914	1.66947	1.82312	1.40238	1.52752	1.35222	1.42041	1.39271	1.59889	1.60953	1.57169	1.44979	1.67683	1.61798	1.45385	1.58581
TC0100000195.mm.1	2.30952	2.37067	2.27193	2.32743	2.3435	Gm4850	NR_015347	THO complex 4 pseudogene	2.34061	2.18411	2.33306	2.33062	2.35922	2.32395	2.32682	2.19099	2.64094	2.31058	2.31825	2.0577	2.40121	2.37159	2.33116	2.21812	2.21744	2.49884	2.32416	2.20403	2.47612	2.39656	2.31664
TC0100000196.mm.1	3.6101	3.6528	3.62939	3.63486	3.71741	Gm6489	ENSMUST00000178167	predicted gene 6489	3.66112	3.54796	3.87196	3.53707	3.43241	3.82648	3.57062	3.696	3.51811	3.5837	3.59632	3.57872	3.75882	3.84044	3.50431	3.54739	3.69682	3.58535	3.65502	3.62802	3.91171	3.69167	3.70062
TC0100000197.mm.1	1.43731	1.46773	1.55711	1.50302	1.40574	NONMMUT000451	NONMMUT000451	NA	1.45128	1.44511	1.65738	1.31219	1.32057	1.4016	1.39192	1.42597	1.65145	1.54855	1.51224	1.63565	1.53199	1.51887	1.3906	1.59271	1.47115	1.54178	1.38543	1.4886	1.17385	1.41141	1.56941
TC0100000198.mm.1	6.23387	5.96689	6.05697	6.09115	6.16967	Gm10307	ENSMUST00000095050	predicted gene 10307	6.05058	6.52672	6.51227	5.9564	6.12336	5.99543	5.94295	6.01661	5.91256	6.11014	5.92773	6.07005	6.11996	6.09725	6.10007	5.9289	6.2129	6.11666	6.14683	6.05913	6.17705	6.20662	6.2587
TC0100000199.mm.1	2.53991	2.5018	2.57212	2.58655	2.54751	Gm7910	ENSMUST00000117896	predicted gene 7910	2.55087	2.5021	2.50022	2.60591	2.54046	2.57858	2.45511	2.53335	2.44016	2.45379	2.6097	2.71309	2.51191	2.50514	2.63904	2.52878	2.61089	2.64892	2.57238	2.56648	2.44448	2.63224	2.52197
TC0100000200.mm.1	6.86886	6.65327	6.57232	6.65303	6.70527	AB353040	uc029qnp.1	NA	6.25752	7.12572	6.91153	6.87412	7.17542	6.30518	7.10646	6.40564	6.79578	6.50161	6.74368	6.55469	6.48931	6.89607	6.69777	6.53625	6.61185	6.52321	6.62489	6.68884	6.79937	6.51122	6.90202
TC0100000201.mm.1	1.84685	1.78011	1.85059	1.82035	1.85316	Khdrbs2	NM_133235	KH domain containing, RNA binding, signal transduction associated 2	1.83622	1.87005	1.8666	1.82392	1.83746	1.78659	1.76101	1.81018	1.76267	1.81746	1.85121	1.80922	1.92445	1.72421	1.84763	1.85497	1.83666	1.83826	1.86621	1.87971	1.86136	1.82852	1.83002
TC0100000202.mm.1	1.5221	1.55262	1.55838	1.55156	1.60177	NONMMUT000454	NONMMUT000454	NA	1.61264	1.54395	1.49643	1.54759	1.4099	1.61608	1.37249	1.76175	1.46017	1.52252	1.39224	1.73738	1.58138	1.76678	1.59165	1.62795	1.34037	1.43104	1.60739	1.65478	1.57932	1.57267	1.59466
TC0100000203.mm.1	1.28885	1.33832	1.33602	1.43792	1.36533	NONMMUT000455	NONMMUT000455	NA	1.30816	1.21462	1.33936	1.29902	1.28308	1.24427	1.38127	1.34828	1.37946	1.31317	1.38625	1.32298	1.32169	1.63663	1.52043	1.38522	1.37801	1.26929	1.26706	1.43626	1.39315	1.36874	1.36142
TC0100000204.mm.1	1.47694	1.29307	1.41059	1.38772	1.35636	NONMMUT000456	NONMMUT000456	NA	1.4121	1.38519	1.7007	1.38794	1.49876	1.41988	1.17477	1.36018	1.21745	1.53111	1.30559	1.3907	1.41497	1.25867	1.60264	1.31781	1.40886	1.35061	1.34102	1.33477	1.41658	1.30249	1.38695
TC0100000205.mm.1	1.3283	1.42938	1.37792	1.31354	1.38623	NONMMUT000457	NONMMUT000457	NA	1.45506	1.22853	1.19034	1.33184	1.43575	1.40151	1.35763	1.37781	1.58055	1.42704	1.3475	1.3274	1.40974	1.28087	1.35202	1.28469	1.44134	1.20877	1.32486	1.68741	1.35088	1.32464	1.24337
TC0100000206.mm.1	1.19001	1.17115	1.24699	1.14125	1.09597	NONMMUT000458	NONMMUT000458	NA	1.18178	1.08681	1.15069	1.14419	1.3866	1.1427	1.29416	1.0703	1.17745	1.23258	1.19278	1.35586	1.20673	1.26547	1.2429	0.985454	1.1668	1.0456	1.13548	1.14605	1.04688	0.954901	1.19655
TC0100000207.mm.1	1.09576	1.18224	1.17377	1.18116	1.15651	NONMMUT000459	NONMMUT000459	NA	1.08083	1.08228	0.878337	1.18206	1.25527	1.03435	1.2074	1.30551	1.18168	1.2762	1.03549	1.18432	1.19908	1.03155	1.22214	1.137	1.27375	1.24137	1.06217	1.10655	1.13245	1.38147	1.09989
TC0100000208.mm.1	1.23028	1.23281	1.23835	1.22494	1.22387	NONMMUT000461	NONMMUT000461	NA	1.20054	1.23926	1.16424	1.26593	1.28143	1.21943	1.20421	1.23437	1.27324	1.1713	1.31453	1.21801	1.24954	1.17098	1.22297	1.24571	1.24456	1.2405	1.17582	1.22663	1.26048	1.22542	1.23101
TC0100000209.mm.1	1.28279	1.29998	1.22325	1.34088	1.27587	KnowTID_00000039	KnowTID_00000039	NA	1.3231	1.17394	1.31926	1.27924	1.31843	1.20229	1.266	1.41041	1.3212	1.14873	1.26472	1.27706	1.2025	1.25798	1.30056	1.5016	1.39992	1.24435	1.31702	1.17261	1.2465	1.27949	1.36372
TC0100000210.mm.1	1.04253	0.969967	1.09614	1.0988	1.07032	Gm23024	ENSMUST00000158770	predicted gene, 23024	1.02296	0.970373	1.0988	1.15445	0.966068	1.0551	0.875065	0.957108	0.992592	1.18864	1.00299	0.95906	1.23386	1.05848	1.14212	1.06973	1.2046	1.01909	1.10827	1.14017	0.904136	1.12802	1.07099
TC0100000211.mm.1	1.1704	1.16525	1.15247	1.16232	1.17357	Gm24901	ENSMUST00000158125	predicted gene, 24901	1.10994	1.18981	1.06317	1.18633	1.30273	0.973643	1.08784	1.44958	1.14995	1.2092	1.09028	1.18021	1.1302	1.0093	1.25521	1.19676	1.21111	1.1392	1.06375	1.20306	1.26215	1.16369	1.17522
TC0100000212.mm.1	1.94475	1.91781	1.89968	1.88764	1.97985	Gm25792	ENSMUST00000083289	predicted gene, 25792	1.79089	1.85264	2.24239	1.86159	1.97621	1.83554	1.91944	1.97927	1.93699	1.8229	1.90423	1.83427	2.03732	1.92047	1.71931	1.83438	1.963	2.00104	1.89442	1.86018	2.12334	2.01912	2.00217
TC0100000213.mm.1	2.33899	2.31545	2.28341	2.32088	2.42538	Gm23453	ENSMUST00000083326	predicted gene, 23453	2.30468	2.36741	2.58479	2.24721	2.19087	2.2893	2.30337	2.23103	2.43811	2.16567	2.40037	2.23216	2.33545	2.3163	2.20688	2.23196	2.38857	2.4607	2.32702	2.44662	2.58556	2.39156	2.37616
TC0100000214.mm.1	4.54762	4.52059	4.53969	4.60401	4.5262	1700001G17Rik	NR_033199	RIKEN cDNA 1700001G17 gene	4.64785	4.78903	4.5242	4.25874	4.51831	4.5568	4.39645	4.57407	4.55504	4.42437	4.50992	4.65136	4.5731	4.63584	4.68541	4.62429	4.52327	4.55123	4.41736	4.6015	4.67443	4.58555	4.35216
TC0100000215.mm.1	4.99268	5.18893	5.04719	5.03494	5.05438	Rab23	NM_001159729	RAB23, member RAS oncogene family	5.08553	4.88368	4.89591	5.09649	5.0018	5.13859	5.21467	5.14958	5.25286	5.09386	4.94304	5.08166	5.07021	4.99197	5.08363	5.00078	5.04246	5.05586	5.12196	4.98374	5.11785	5.02109	5.02724
TC0100000216.mm.1	8.83118	9.14995	9.07635	8.99092	8.90137	Dst	NM_001276764	dystonin	9.07225	8.76583	8.37857	9.03786	8.90142	9.13639	9.10886	9.13192	9.22261	9.15002	9.05556	9.06801	9.03181	9.07966	9.06098	9.07014	8.93699	8.80683	9.08921	9.06652	8.48822	8.95371	8.90918
TC0100000217.mm.1	1.82296	1.82188	1.87572	1.92723	1.98112	NONMMUT000494	NONMMUT000494	NA	1.86341	1.82133	1.82487	1.76701	1.83817	1.84239	1.72722	1.84223	1.87569	1.78608	1.89223	1.73033	2.09425	1.85467	1.86239	1.96774	1.97312	1.97821	2.19333	1.87089	1.8086	2.05203	1.98077
TC0100000218.mm.1	3.68621	3.57824	3.67479	3.59192	3.60483	NONMMUT000496	NONMMUT000496	NA	3.40368	3.83972	3.59605	3.76925	3.82235	3.25914	3.63151	3.57142	3.85089	3.76318	3.56057	3.67092	3.70452	3.72486	3.73562	3.58439	3.47368	3.44103	3.41357	3.56807	3.55258	3.58935	3.90059
TC0100000219.mm.1	3.35531	3.30725	3.27101	3.3976	3.13131	NONMMUT000497	NONMMUT000497	NA	3.14459	3.53469	3.10756	3.43079	3.55891	3.16417	3.35475	3.32601	3.38408	3.42513	3.18066	3.12841	3.34983	3.44583	3.08906	3.79237	3.44267	3.21805	3.15367	2.95193	3.24125	3.05233	3.25738
TC0100000220.mm.1	4.06909	3.94169	4.0734	4.15385	4.16013	Mir6896	NR_105861	microRNA mir-6896	4.12046	4.06816	3.99132	4.17195	3.99355	3.87091	4.0269	4.03974	3.82921	4.06911	4.00726	4.06819	4.14902	4.10621	4.15863	4.12952	4.25752	4.1174	4.17074	4.14155	4.22114	4.16176	4.10547
TC0100000221.mm.1	9.54485	9.98208	9.83647	9.74452	9.58893	D630036G22Rik	OTTMUST00000117001	novel transcript	9.8522	9.45531	9.05129	9.73284	9.63262	9.92916	9.94819	10.0078	10.0432	9.95732	9.76243	9.77549	9.85066	9.84362	9.85726	9.65821	9.66894	9.69457	9.85629	9.78886	9.08097	9.60646	9.61207
TC0100000222.mm.1	6.7258	6.78356	6.64335	6.59045	6.76566	Imp4	NM_178601	IMP4, U3 small nucleolar ribonucleoprotein, homolog (yeast)	6.63352	6.76502	6.8119	6.64483	6.77371	6.80374	6.78201	6.72109	6.8274	6.67604	6.60209	6.61943	6.67585	6.49823	6.626	6.40541	6.65068	6.77194	6.77747	6.81713	6.75559	6.75148	6.72666
TC0100000223.mm.1	4.62508	4.86792	4.73732	4.59828	4.52458	D1Ertd448e	XR_104542	DNA segment, Chr 1, ERATO Doi 448, expressed	4.46838	4.74183	4.47556	4.64493	4.79471	4.75517	4.85875	4.97976	4.87801	4.80284	4.65927	4.71859	4.76857	4.42209	4.50588	4.69839	4.54739	4.81764	4.66352	4.28037	4.28837	4.67545	4.71519
TC0100000224.mm.1	4.13268	3.9852	4.08402	4.09997	4.15356	Ptpn18	NM_011206	protein tyrosine phosphatase, non-receptor type 18	4.06227	4.19863	4.31395	4.014	4.07454	4.03744	4.0263	4.02244	3.85463	3.99562	4.08378	4.00704	4.24963	4.10388	4.03674	4.07793	4.10361	4.17769	4.06724	4.26455	4.24709	4.11019	4.07874
TC0100000225.mm.1	2.62465	2.55508	2.60817	2.61009	2.51377	NONMMUT000507	NONMMUT000507	NA	2.70248	2.85166	2.70524	2.45826	2.4056	2.5341	2.59866	2.3022	2.78536	2.49115	2.71598	2.60334	2.62222	2.855	2.6635	2.27184	2.58442	2.67568	2.7471	2.55589	2.50051	2.34027	2.4251
TC0100000226.mm.1	3.21807	3.22427	3.23121	3.23931	3.22448	Prss39	NM_009355	protease, serine 39	3.44821	3.19848	3.12123	3.19015	3.13229	3.21545	3.20856	3.32549	3.14759	3.16783	3.22249	3.29871	3.2358	3.40384	3.17231	3.2205	3.29237	3.10755	3.15802	3.27076	3.22939	3.27408	3.19015
TC0100000227.mm.1	3.94543	3.93637	4.0076	3.99453	3.96045	Cfc1	NM_007685	cripto, FRL-1, cryptic family 1	4.09154	4.02162	4.00011	3.62461	3.98929	3.92407	3.93751	3.99112	3.89278	3.70571	4.04434	4.02867	4.25168	4.09663	4.0891	3.92199	3.88235	3.98256	3.79177	4.05393	4.03053	4.09604	3.82996
TC0100000228.mm.1	4.89521	4.88668	4.97329	4.94413	4.81769	Amer3	NM_213727	APC membrane recruitment 3	4.95283	4.71178	4.84409	4.73487	5.23248	4.86016	4.85446	4.96354	4.86854	4.91218	4.94401	5.02236	5.01462	4.96218	4.88071	5.05204	4.83309	4.99263	4.60289	5.04942	4.66106	4.84643	4.92866
TC0100000229.mm.1	2.90229	2.97232	3.56695	2.67032	2.59453	DQ699191	uc007apc.2	NA	3.19549	2.78979	2.46612	2.91895	3.14109	3.02166	3.52554	2.35444	2.98764	3.25918	3.72625	3.43179	3.8506	2.69507	2.76035	3.3026	2.43573	2.15785	2.32008	2.40799	3.00841	3.2526	1.98358
TC0100000230.mm.1	4.02486	3.96193	4.09087	4.11025	4.09469	Arhgef4	NM_183019	Rho guanine nucleotide exchange factor (GEF) 4	4.13072	3.97812	4.0109	4.01179	3.99276	4.09033	3.86909	4.02276	3.86553	4.03659	4.09022	4.0188	4.21786	4.1497	4.00957	4.27422	4.11022	4.00754	3.99531	4.26283	4.07908	4.12009	4.01615
TC0100000231.mm.1	1.95909	1.82854	2.02234	1.95023	1.94682	NONMMUT000518	NONMMUT000518	NA	2.21768	1.86681	1.81215	2.01923	1.87957	1.86163	1.86167	1.95349	1.63737	2.03494	1.90627	1.80802	2.34013	2.04528	2.11394	1.93516	1.78234	1.87445	1.99061	1.99599	1.96453	1.87793	1.90503
TC0100000232.mm.1	1.96282	1.8991	1.98125	1.80367	1.8925	NONMMUT000520	NONMMUT000520	NA	1.79455	2.0937	1.97531	1.95019	2.00034	1.86745	1.92977	1.9663	1.83286	1.98689	2.0105	1.857	2.07061	1.68409	1.87908	1.80653	1.7791	1.86958	1.89449	1.93129	1.8613	1.92996	1.84546
TC0100000233.mm.1	7.48506	7.51577	7.27673	7.45278	7.48598	Plekhb2	NM_145516	pleckstrin homology domain containing, family B (evectins) member 2	7.29533	7.63137	7.77788	7.29047	7.43022	7.53633	7.48103	7.43193	7.61381	7.33736	7.23806	7.26469	7.26681	7.20652	7.33627	7.73553	7.41262	7.57296	7.57479	7.36961	7.6425	7.58709	7.2559
TC0100000234.mm.1	3.01502	2.99812	2.82831	2.98849	3.07172	Gm25634	ENSMUST00000082667	predicted gene, 25634	3.18628	2.91259	3.04511	2.81076	3.12034	2.877	2.81324	3.1809	3.12132	2.94192	2.97236	2.76363	2.63533	3.05529	2.94719	3.07937	2.89271	2.96789	3.04389	2.89274	3.13661	2.95856	3.3268
TC0100000235.mm.1	1.77506	1.8732	1.84415	1.81354	1.85504	1110002O04Rik	uc007apm.1	RIKEN cDNA 1110002O04 gene	1.84115	1.71781	1.64307	1.75987	1.91343	1.86331	1.93502	1.89653	1.79793	1.5521	1.8078	2.02679	1.98992	1.73557	1.70794	1.83568	2.00119	1.78731	1.93825	1.91153	1.83531	1.82865	1.76146
TC0100000236.mm.1	2.10932	1.91975	2.01214	2.08353	2.00713	KnowTID_00000041	KnowTID_00000041	NA	2.11051	2.18551	2.03914	1.988	2.22345	2.05009	1.81866	1.99951	1.81076	1.90299	1.91842	2.07841	2.14873	2.02177	2.10599	1.98142	2.16995	2.13853	2.09825	1.89622	1.93801	2.08399	2.01921
TC0100000237.mm.1	6.10915	5.8933	5.88147	5.82725	5.8599	Hs6st1	NM_015818	heparan sulfate 6-O-sulfotransferase 1	5.85374	6.13546	6.5547	5.89362	6.10824	6.02081	5.72641	5.89454	5.93144	5.75527	5.81444	5.92881	6.02738	5.64641	5.76652	5.63052	5.93778	6.15502	5.83882	5.88887	5.74297	6.06647	5.76235
TC0100000238.mm.1	7.79074	7.66331	7.8646	7.84575	7.84925	NONMMUT000540	NONMMUT000540	NA	7.73993	7.87464	7.79673	7.74372	7.79869	7.72627	7.80369	7.69222	7.43108	7.69089	7.92733	7.78175	8.05844	7.98829	7.73158	7.9148	7.8447	7.74937	7.68894	8.01182	7.90531	7.80336	7.83679
TC0100000239.mm.1	2.53163	2.49372	2.70364	2.48972	2.51092	KnowTID_00000042	KnowTID_00000042	NA	2.73579	2.56319	2.44322	2.64367	2.27229	2.52764	2.64153	2.33577	2.46993	2.58428	2.73716	2.70782	2.78529	2.58917	2.39295	2.46753	2.56257	2.4364	2.48143	2.55059	2.36235	2.65666	2.50359
TC0100000240.mm.1	4.96404	5.13597	5.00907	5.07026	4.94454	Arid5a	NM_001172205	AT rich interactive domain 5A (MRF1-like)	4.93703	5.00759	4.86772	5.00497	5.00289	4.87731	5.11512	5.2623	5.28917	5.00996	4.87465	4.92082	5.23085	5.00293	5.07505	5.1464	5.10727	5.01963	4.79866	5.13038	4.83118	4.99973	4.96275
TC0100000241.mm.1	2.39085	2.33434	2.35034	2.3387	2.36146	KnowTID_00000043	KnowTID_00000043	NA	2.48347	2.32421	2.33126	2.37451	2.44079	2.32873	2.3632	2.60408	2.04136	2.30637	2.17562	2.34769	2.57168	2.45646	2.37065	2.42104	2.19543	2.24992	2.32674	2.42142	2.2036	2.45328	2.40228
TC0100000242.mm.1	2.58784	2.5571	2.62688	2.60783	2.62818	Fer1l5	NM_001277076	fer-1-like 5 (C. elegans)	2.67827	2.58819	2.57904	2.52295	2.57075	2.60793	2.52959	2.60994	2.48095	2.52675	2.61553	2.5874	2.77783	2.68147	2.54557	2.62824	2.58626	2.59763	2.5798	2.72931	2.63329	2.61661	2.58187
TC0100000243.mm.1	2.49323	2.58429	2.6054	2.60776	2.59231	NONMMUT000560	NONMMUT000560	NA	2.58849	2.50014	2.3922	2.49001	2.4953	2.72662	2.56339	2.55137	2.49578	2.51314	2.53238	2.59647	2.7796	2.57054	2.56213	2.61315	2.63546	2.6575	2.43678	2.8327	2.63118	2.55488	2.506
TC0100000244.mm.1	4.71015	4.84982	4.81729	4.83628	4.77799	Cnnm4	NM_033570	cyclin M4	4.84132	4.76202	4.4944	4.66146	4.79154	4.70537	4.82206	4.90889	4.96297	4.89764	4.63543	4.84003	4.89607	4.67468	4.75995	4.96468	4.8373	4.94482	4.62765	4.89386	4.60811	4.9074	4.85296
TC0100000245.mm.1	2.32738	2.29497	2.26916	2.25743	2.2775	NONMMUT000565	NONMMUT000565	NA	2.28662	2.28948	2.09233	2.71948	2.24899	2.32762	2.33452	2.29476	2.22298	2.21229	2.23505	2.35499	2.27433	2.24657	2.13706	2.39614	2.26005	2.24731	2.11606	2.3417	2.31656	2.30135	2.31185
TC0100000246.mm.1	2.98679	2.86418	2.99221	2.99094	2.90229	NONMMUT000566	NONMMUT000566	NA	2.98578	2.9883	2.93161	3.00551	3.02275	2.72713	2.90318	2.91216	2.91426	2.67059	3.09566	2.87106	3.33151	2.86163	2.86361	3.14047	3.19581	2.89316	2.9516	3.11434	2.73465	2.90817	2.80267
TC0100000247.mm.1	5.03543	5.03082	4.90798	5.01828	4.85002	Cnnm3	NM_001039551	cyclin M3	5.15562	4.99955	4.83313	5.09033	5.0985	5.08758	5.08995	4.94598	4.99979	4.91175	4.91902	4.93824	4.86289	4.96683	5.03463	4.99344	5.01232	5.08419	4.81865	4.96291	4.75425	4.78791	4.9264
TC0100000248.mm.1	3.3995	3.49243	3.496	3.39951	3.39086	NONMMUT000569	NONMMUT000569	NA	3.45115	3.2273	3.30951	3.60256	3.40699	3.52121	3.41089	3.42955	3.60807	3.22315	3.48888	3.59848	3.67347	3.42322	3.29657	3.18563	3.58067	3.51148	3.40599	3.48095	3.43734	3.28081	3.34919
TC0100000249.mm.1	2.26627	2.38348	2.41471	2.39434	2.33675	NONMMUT000573	NONMMUT000573	NA	2.28313	2.06985	2.34588	2.20708	2.42541	2.3335	2.36854	2.33693	2.49496	2.43966	2.38229	2.31856	2.51833	2.34411	2.4561	2.40225	2.45159	2.31765	2.36409	2.51651	2.19129	2.36519	2.24669
TC0100000250.mm.1	3.53112	3.45387	3.62253	3.63276	3.56547	D430040D24Rik	ENSMUST00000149224	RIKEN cDNA D430040D24 gene	3.69543	3.63117	3.60425	3.25275	3.472	3.51549	3.36056	3.60067	3.33876	3.51088	3.56886	3.75491	3.65546	3.79598	3.54614	3.71414	3.55113	3.55639	3.36896	3.70205	3.5894	3.64728	3.51965
TC0100000251.mm.1	8.90704	8.90447	8.9024	8.99007	8.90068	Gm6428	ENSMUST00000161062	predicted pseudogene 6428	8.8984	8.90782	8.84315	8.90947	8.97638	8.98348	8.94958	8.89862	8.7862	8.90177	8.96503	8.88349	8.85932	8.95594	8.97224	8.97462	9.00571	9.04183	8.9054	8.97486	8.95151	8.87615	8.79549
TC0100000252.mm.1	1.20734	1.25426	1.22692	1.20674	1.1688	Gm24133	ENSMUST00000104746	predicted gene, 24133	1.30567	1.14147	1.12959	1.27997	1.17998	1.26403	1.26941	1.10979	1.37381	1.17687	1.26676	1.25562	1.20844	1.21657	1.12156	1.18323	1.29736	1.21496	1.27262	1.19741	1.13224	1.06699	1.17476
TC0100000253.mm.1	7.64889	7.59158	7.64857	7.76905	7.93483	Cox5b	NM_009942	cytochrome c oxidase subunit Vb	7.75475	7.4175	7.58937	7.84488	7.63793	7.62848	7.5795	7.61443	7.54393	7.81332	7.4864	7.62726	7.66729	7.45849	7.73297	7.8184	7.92841	7.90699	7.87661	7.95275	7.71227	8.07736	8.05515
TC0100000254.mm.1	1.98648	1.96315	2.01535	2.02612	1.9815	4933424G06Rik	NR_040290	RIKEN cDNA 4933424G06 gene	1.96149	2.00174	2.08564	1.90925	1.97425	1.9453	1.93867	1.92524	2.04338	1.92826	1.99145	2.0378	2.10387	2.12395	1.90814	2.10121	2.0086	1.9887	1.8924	2.0727	1.96423	1.99223	1.98592
TC0100000255.mm.1	3.81533	3.7814	3.82476	3.85219	3.86083	Zap70	NM_001289612	zeta-chain (TCR) associated protein kinase	3.78972	3.90887	3.92487	3.70757	3.74564	3.81106	3.74817	3.85749	3.70887	3.69129	3.88694	3.78307	3.93775	3.95086	3.80546	3.7556	3.87955	3.86948	3.70445	4.01477	3.86589	3.89361	3.82543
TC0100000256.mm.1	6.35473	6.20313	6.19251	6.24661	6.33356	n-R5s210	ENSMUST00000177688	nuclear encoded rRNA 5S 210	6.42075	6.27926	6.90083	6.04375	6.12906	6.36984	6.20645	6.22079	6.01544	6.07627	6.25397	6.29358	6.14623	6.01785	6.0561	6.31732	6.38525	6.45655	6.18683	6.23128	6.69675	6.2323	6.32065
TC0100000257.mm.1	2.91671	2.88613	3.01773	3.02825	2.96647	Vwa3b	XM_003084438	von Willebrand factor A domain containing 3B	2.99931	2.9194	2.89813	2.89819	2.86853	2.8944	2.89474	2.90214	2.85324	2.96286	3.05201	2.95201	3.10404	3.14117	3.03744	3.06638	3.05339	2.84285	2.91787	3.06602	2.97927	2.98731	2.88188
TC0100000258.mm.1	3.93237	3.97202	4.01692	3.98935	4.00959	Cnga3	NM_001282010	cyclic nucleotide gated channel alpha 3	4.0666	3.95038	3.90365	3.84838	3.89285	4.05361	3.9585	3.99602	3.87993	3.85162	4.00645	3.97771	4.23188	4.14241	3.81289	3.98533	4.02986	3.97626	3.90839	4.13574	4.03502	3.97063	3.99814
TC0100000259.mm.1	7.27424	7.60853	7.50636	7.49773	7.22856	Inpp4a	NM_030266	inositol polyphosphate-4-phosphatase, type I	7.49247	7.26158	6.84172	7.36938	7.40606	7.47876	7.60005	7.71904	7.63629	7.58951	7.50083	7.47974	7.45538	7.5597	7.43607	7.52466	7.3983	7.56992	7.3817	7.36011	6.75587	7.32907	7.31604
TC0100000260.mm.1	6.36606	6.44693	6.4128	6.38114	6.36451	Unc50	NM_026123	unc-50 homolog (C. elegans)	6.42051	6.34697	6.41499	6.23191	6.41589	6.44808	6.38379	6.50889	6.44696	6.45096	6.41654	6.3647	6.41899	6.30944	6.46604	6.30626	6.43372	6.39022	6.45282	6.32614	6.46382	6.25057	6.32919
TC0100000261.mm.1	2.54535	2.53529	2.58049	2.53563	2.53989	NONMMUT000614	NONMMUT000614	NA	2.44524	2.50564	2.5526	2.73322	2.49006	2.50414	2.69765	2.5141	2.42526	2.67096	2.44844	2.62777	2.57479	2.56151	2.46714	2.55166	2.49353	2.60431	2.44977	2.66958	2.5922	2.44664	2.54124
TC0100000262.mm.1	3.44955	3.41903	3.45776	3.47855	3.46153	XR_140434	XR_140434	Jackson Lab	3.53216	3.44762	3.45079	3.44697	3.37022	3.55278	3.35434	3.42995	3.33903	3.30477	3.60703	3.17416	3.7451	3.57754	3.49959	3.2674	3.65543	3.39277	3.46549	3.74366	3.37185	3.36917	3.35746
TC0100000263.mm.1	2.89062	2.86937	2.9311	2.95375	2.95473	4930556I23Rik	ENSMUST00000160659	RIKEN cDNA 4930556I23 gene	2.94485	2.86434	2.88304	2.80586	2.955	2.89553	2.83562	2.89286	2.85344	2.8625	2.8694	2.8759	3.11661	3.17793	2.85875	2.87091	2.95809	2.90304	2.88309	3.12415	2.87162	3.01998	2.87482
TC0100000264.mm.1	2.13924	2.20372	2.25956	2.20043	2.21073	NONMMUT000623	NONMMUT000623	NA	2.23134	2.16356	2.09208	2.10685	2.10237	2.19798	2.23965	2.18468	2.19259	2.216	2.2055	2.18499	2.43174	2.20547	2.22828	2.17047	2.26539	2.13255	2.22472	2.26717	2.1873	2.19646	2.17798
TC0100000265.mm.1	3.03346	3.11383	3.18665	2.99841	3.06383	NONMMUT000630	NONMMUT000630	NA	2.91209	3.09836	3.14074	2.96819	3.04795	3.09067	3.16338	3.08777	3.1135	2.96622	3.50837	2.94634	3.32567	2.96767	3.01277	2.97934	3.03389	2.99835	3.22553	3.14756	3.09544	2.76122	3.08938
TC0100000266.mm.1	3.18936	3.1587	3.30421	3.35055	3.4012	Gm26805	ENSMUST00000181885	predicted gene, 26805	3.15316	3.02673	3.29075	3.11502	3.36113	3.24374	3.0747	3.44974	2.86661	3.14654	3.27773	3.21638	3.57619	3.47634	3.15812	3.32957	3.33914	3.44961	3.40945	3.3416	3.43897	3.56449	3.2515
TC0100000267.mm.1	3.94625	4.07228	4.03312	4.02274	4.07092	Lipt1	NM_001037918	lipoyltransferase 1	4.10002	3.77316	3.68882	4.14419	4.02505	4.09974	4.10831	3.93529	4.14577	4.22201	3.94468	3.94979	4.016	3.99556	3.94892	4.00437	4.11796	4.0469	4.17267	4.10889	3.78256	4.11131	4.17917
TC0100000268.mm.1	5.23363	5.07401	5.05724	5.20993	5.28664	Mrpl30	NM_027098	mitochondrial ribosomal protein L30	5.0909	4.97581	5.39752	5.33192	5.37199	5.07792	5.09868	5.05636	5.06307	5.19593	4.95869	5.10564	4.96869	5.16281	5.18818	5.17971	5.35704	5.16189	5.29479	5.1685	5.3149	5.24813	5.40689
TC0100000269.mm.1	2.25327	2.32128	2.28231	2.30212	2.34575	Gm15457	ENSMUST00000129513	predicted gene 15457	2.32687	2.37599	2.13759	2.29672	2.12916	2.42056	2.30006	2.32978	2.23472	2.25613	2.27264	2.21137	2.38909	2.39618	2.24164	2.28959	2.31668	2.26649	2.30191	2.41249	2.33047	2.31389	2.37001
TC0100000270.mm.1	2.48314	2.56165	2.63614	2.49472	2.44179	Gm23409	ENSMUST00000158516	predicted gene, 23409	2.47369	2.50708	2.78556	2.43129	2.21808	2.5388	2.49924	2.74433	2.46421	2.88322	2.72463	2.43508	2.50165	2.68909	2.72417	2.21444	2.39564	2.45029	2.44093	2.53443	2.34097	2.43034	2.46229
TC0100000271.mm.1	8.00187	7.94802	8.04355	7.96356	7.88812	Eif5b	NM_198303	eukaryotic translation initiation factor 5B	8.01099	7.82571	7.94748	8.14036	8.08481	7.94879	7.84577	7.93191	8.06562	8.06159	8.08168	8.0634	7.96753	8.03264	7.9757	7.94377	8.02883	7.83685	8.00194	7.76111	7.92274	7.90844	7.84634
TC0100000272.mm.1	2.53942	2.37862	2.39647	2.07658	2.22209	NONMMUT000644	NONMMUT000644	NA	2.27349	2.65075	2.64693	2.32711	2.7988	2.42953	2.14763	2.42103	2.51627	2.39313	2.42115	2.34391	2.42767	2.2937	2.11324	1.98356	1.83804	2.15437	2.35829	1.87165	2.27243	2.14949	2.45858
TC0100000273.mm.1	2.06481	2.08719	2.12487	2.03999	2.09801	KnowTID_00000046	KnowTID_00000046	NA	2.06708	2.06469	2.22873	1.92155	2.04199	2.05099	1.9791	2.11344	2.20524	2.00178	2.13497	2.21128	2.15146	2.05348	1.9576	2.02823	2.08554	2.07512	2.01774	2.21785	2.10576	2.08063	2.06807
TC0100000274.mm.1	2.32516	2.3631	2.40071	2.38679	2.39638	Gm16150	ENSMUST00000127620	predicted gene 16150	2.3572	2.22737	2.3445	2.29414	2.40261	2.35443	2.34444	2.47419	2.27934	2.33339	2.35959	2.39679	2.51306	2.45997	2.24585	2.36403	2.4897	2.37442	2.34882	2.61452	2.30955	2.4866	2.2224
TC0100000275.mm.1	2.0219	1.96314	2.07418	2.05449	2.04307	Gm16151	ENSMUST00000129696	predicted gene 16151	2.09644	2.06524	2.00892	1.76824	2.17063	1.95001	2.11222	1.91719	1.87313	1.8693	2.00268	2.04016	2.38458	2.1188	2.1641	1.99175	2.03387	1.96394	1.96152	2.23087	2.08724	2.04311	1.89259
TC0100000276.mm.1	2.62183	2.50854	2.66188	2.63998	2.60541	Gm16152	ENSMUST00000131663	predicted gene 16152	2.71176	2.6358	2.56405	2.53836	2.6592	2.57108	2.40208	2.56379	2.49722	2.61932	2.70743	2.67382	2.64694	2.73204	2.66725	2.62421	2.54991	2.62648	2.60853	2.60525	2.61385	2.67823	2.52117
TC0100000277.mm.1	2.70461	2.74331	2.77721	2.76327	2.83799	KnowTID_00000047	KnowTID_00000047	NA	2.72594	2.71775	2.72604	2.55348	2.79982	2.81588	2.66937	2.82814	2.65984	2.72814	2.71538	2.69679	2.96852	2.85263	2.73005	2.71733	2.83289	2.68345	2.80994	2.91204	2.88545	2.82143	2.76109
TC0100000278.mm.1	2.3696	2.45266	2.4511	2.57661	2.44325	NONMMUT000667	NONMMUT000667	NA	2.42772	2.10557	2.58965	2.35682	2.36822	2.44757	2.40421	2.47062	2.48826	2.44758	2.54516	2.46027	2.35138	2.35503	2.59939	3.11305	2.46301	2.35257	2.50511	2.4646	2.4829	2.37126	2.39237
TC0100000279.mm.1	2.15424	2.12276	2.25318	2.14397	2.1715	Nms	NM_001011684	neuromedin S	2.21467	2.10434	2.24434	2.16689	2.04095	2.21515	2.17247	2.17259	1.93084	2.31833	2.23807	2.18111	2.2752	2.13199	2.04223	2.16859	2.19941	2.17761	2.05761	2.4274	2.13658	2.08479	2.15111
TC0100000280.mm.1	7.93341	7.96	8.00046	7.91715	7.87052	Pdcl3	NM_026850	phosducin-like 3	7.96876	7.63518	8.00004	8.11659	7.94648	7.86608	7.88836	7.95353	8.13201	8.05329	7.93618	7.97849	8.03388	8.08056	7.94261	7.81179	7.93725	7.81353	8.04619	7.69267	7.93928	7.82885	7.84562
TC0100000281.mm.1	4.52966	4.80925	4.66493	4.49193	4.40467	NONMMUT000671	NONMMUT000671	NA	4.38314	4.65207	4.48623	4.90139	4.22548	4.64409	4.76555	4.88506	4.94229	4.59614	4.75158	4.56917	4.74282	4.74208	4.55298	4.57834	4.26811	4.31816	4.30365	4.36811	4.53215	4.22724	4.59218
TC0100000282.mm.1	6.3824	7.174	5.94328	6.74617	6.71679	Npas2	NM_008719	neuronal PAS domain protein 2	5.60883	6.05404	6.48235	6.20512	7.56168	5.95071	7.82018	7.90985	7.01524	5.81058	5.5909	6.13963	6.23203	6.61472	6.71968	6.48865	6.53406	7.37374	6.90999	7.07426	6.27417	6.42429	6.90122
TC0100000283.mm.1	9.28075	9.1508	9.00415	9.23175	9.17639	Gm3617	ENSMUST00000173076	predicted gene 3617	9.14547	9.2757	9.53526	9.18462	9.26272	9.24597	9.17786	9.17274	9.00661	8.94371	9.15565	9.02382	8.89341	9.28921	9.1818	9.13388	9.2921	9.26174	9.18343	9.08433	9.40628	9.08168	9.12623
TC0100000284.mm.1	8.14811	8.09374	8.05812	8.07122	8.13059	Rpl31	NM_001252218	ribosomal protein L31	8.08431	8.10034	8.32215	8.08283	8.15092	8.14722	8.06391	8.10898	8.05484	8.04349	8.07598	8.10489	8.00813	8.09037	8.02772	7.98791	8.11775	8.13236	8.15024	8.11704	8.24074	8.10326	8.04169
TC0100000285.mm.1	6.89099	6.89757	6.90499	6.87259	7.10627	Gm24826	ENSMUST00000083695	predicted gene, 24826	6.8661	6.83151	7.17051	6.70878	6.87804	6.97893	6.98741	6.94279	6.68114	6.75795	6.75107	7.08849	7.02247	6.74686	6.76857	6.95438	7.02111	6.87204	7.10581	7.04641	7.3249	6.97333	7.08091
TC0100000286.mm.1	5.5365	5.54205	5.53913	5.51731	5.45431	Cnot11	NM_028043	CCR4-NOT transcription complex, subunit 11	5.66222	5.53103	5.39398	5.51976	5.57554	5.51315	5.49508	5.47678	5.68321	5.69264	5.44749	5.53113	5.48525	5.38661	5.62286	5.54789	5.55554	5.47364	5.48025	5.43806	5.46665	5.42755	5.45906
TC0100000287.mm.1	2.79473	2.58687	2.74569	2.71725	2.69285	D930019O06Rik	ENSMUST00000181841	RIKEN cDNA D930019O06	2.89829	3.00424	2.74317	2.56489	2.76305	2.46051	2.54227	2.86778	2.47693	2.5846	3.09384	2.57165	2.73265	2.77915	2.74293	2.67875	2.52455	2.86087	2.70433	2.63072	2.78122	2.62328	2.72471
TC0100000288.mm.1	1.53374	1.55011	1.61803	1.5675	1.59151	NONMMUT000695	NONMMUT000695	NA	1.64973	1.4594	1.48297	1.45612	1.62048	1.55848	1.61705	1.49126	1.53364	1.63919	1.57327	1.5478	1.71187	1.63834	1.60542	1.51439	1.5478	1.53155	1.55339	1.67103	1.53205	1.66059	1.5405
TC0100000289.mm.1	7.58229	7.24867	7.19228	7.32593	7.25333	Map4k4	NM_001252200	mitogen-activated protein kinase kinase kinase kinase 4	7.1468	7.78167	7.59704	7.5386	7.84731	7.08534	7.27268	7.29424	7.34243	7.10974	7.09997	7.1987	7.3607	7.34298	7.34899	7.09892	7.26097	7.57778	7.26403	7.21838	7.24786	7.24876	7.28762
TC0100000290.mm.1	3.68778	3.69947	3.54414	3.64474	3.61815	NONMMUT000698	NONMMUT000698	NA	3.60067	3.79279	3.87078	3.4542	3.72048	3.72506	3.77322	3.62678	3.67281	3.48096	3.54306	3.51917	3.63338	3.84441	3.64171	3.79522	3.55285	3.3895	3.64475	3.54903	3.50958	3.57942	3.80798
TC0100000291.mm.1	4.235	4.10654	3.88685	3.94922	4.01243	NONMMUT000699	NONMMUT000699	NA	3.76606	4.47177	4.40782	4.15571	4.37361	4.06088	4.04616	4.1004	4.2187	3.77906	3.90595	3.99431	3.86809	4.10309	4.19854	3.78971	3.7833	3.87148	3.88076	4.01692	4.1877	3.92007	4.05672
TC0100000292.mm.1	3.53299	2.93222	2.95675	3.10814	3.14477	Il1r2	NM_010555	interleukin 1 receptor, type II	2.73462	4.02523	4.0929	3.00692	3.80528	2.99628	3.04648	2.50659	3.17953	2.83285	2.93319	2.84666	3.21432	3.00591	3.30272	2.60866	2.88147	3.74196	3.20451	2.94702	3.58545	3.04843	2.93842
TC0100000293.mm.1	1.46571	1.50928	1.48954	1.59045	1.54598	NONMMUT000706	NONMMUT000706	NA	1.50792	1.48492	1.46227	1.38144	1.492	1.3711	1.42843	1.69687	1.54072	1.39549	1.44121	1.62717	1.49429	1.68552	1.47479	1.73688	1.55568	1.49939	1.46952	1.57422	1.86726	1.46054	1.35837
TC0100000294.mm.1	4.01869	4.00662	4.03552	3.97093	4.06478	NONMMUT000707	NONMMUT000707	NA	4.11571	4.0294	4.0308	3.97029	3.94726	4.09918	3.97514	4.0177	3.93446	3.90116	4.11286	3.83106	4.297	4.00807	3.86807	3.95431	4.05598	3.96822	3.90599	4.27242	4.0782	4.07665	3.99063
TC0100000295.mm.1	8.19184	8.15777	8.11502	8.08041	8.15445	Il1r1	NM_001123382	interleukin 1 receptor, type I	8.1104	8.44085	8.18347	8.14786	8.07662	7.90732	8.17903	8.23537	8.30936	8.05212	8.03312	8.11334	8.26151	8.15448	8.18286	7.87928	8.07343	8.112	8.27097	8.105	8.14932	8.05314	8.19379
TC0100000296.mm.1	4.65272	4.78391	4.67009	4.72118	4.743	NONMMUT000708	NONMMUT000708	NA	4.61134	4.81955	4.30127	5.03522	4.49621	4.67077	4.99394	4.35728	5.11365	4.56811	4.84064	4.4973	4.77431	4.75476	4.95755	4.57913	4.8104	4.50405	4.78712	4.62724	4.70137	4.62938	4.96992
TC0100000297.mm.1	5.08817	4.46465	4.73607	4.58518	4.83119	Il1rl2	NM_133193	interleukin 1 receptor-like 2	4.78543	5.66022	5.44253	4.78701	4.76563	4.5888	4.35817	4.33791	4.57372	4.73267	4.7314	4.6546	4.82561	4.54804	4.71822	4.02779	4.94298	4.68889	4.80957	4.28702	5.25187	4.67178	5.13568
TC0100000298.mm.1	3.92427	3.7498	3.63813	3.62345	3.69131	Il1rl1	NM_001025602	interleukin 1 receptor-like 1	3.66203	3.89721	3.87673	3.99778	4.1876	3.7964	3.75526	3.64425	3.80328	3.75002	3.68058	3.62503	3.4969	3.64125	3.60526	3.32976	3.77639	3.76461	3.70782	3.28307	4.02653	3.61184	3.82731
TC0100000299.mm.1	3.19906	3.05186	3.03398	3.0666	3.07717	Il18r1	NM_001161842	interleukin 18 receptor 1	2.91086	3.25332	3.27276	3.38734	3.171	2.99029	3.1578	3.05644	3.00291	2.97177	3.01378	3.02712	3.12325	3.0211	2.98036	2.80606	3.20102	3.32444	3.00593	2.99847	3.18245	3.0723	3.12671
TC0100000300.mm.1	3.12164	2.80011	2.74225	2.8659	2.764	Il18rap	NM_010553	interleukin 18 receptor accessory protein	2.70945	3.50141	3.38205	2.95192	3.06335	2.82523	2.87163	2.7499	2.75368	2.57073	2.75936	2.74653	2.89236	2.83937	2.77392	2.65686	3.00125	3.05809	2.74928	2.68184	2.88215	2.73562	2.77108
TC0100000301.mm.1	2.70867	2.5436	2.61383	2.61639	2.61653	Slc9a4	NM_177084	solute carrier family 9 (sodium/hydrogen exchanger), member 4	2.68952	2.80847	2.79043	2.62403	2.63087	2.58786	2.44268	2.57792	2.56594	2.58678	2.55128	2.59034	2.72691	2.57534	2.54184	2.43709	2.78034	2.74733	2.5898	2.62364	2.74615	2.61688	2.50617
TC0100000302.mm.1	4.01003	4.39172	4.31226	4.30828	4.31185	Slc9a2	NM_001033289	solute carrier family 9 (sodium/hydrogen exchanger), member 2	4.65477	3.88082	3.75448	4.00004	3.76002	4.24638	4.32346	4.63023	4.36682	4.4977	4.1104	4.35735	4.28359	4.1503	4.49352	4.44375	4.33588	4.11796	4.55072	4.40924	3.86493	4.39107	4.34331
TC0100000303.mm.1	3.94001	3.8784	3.92422	3.92062	3.98573	NONMMUT000715	NONMMUT000715	NA	3.94251	3.98386	3.96396	3.90469	3.90501	3.93225	3.91636	3.92793	3.73706	3.73597	3.98748	3.90476	4.06867	3.97164	3.93284	3.86698	3.92984	3.90181	3.9394	4.2641	3.92399	3.90915	3.89202
TC0100000304.mm.1	4.11288	4.39669	4.40253	4.04303	5.05772	Tmem182	NM_001081198	transmembrane protein 182	3.89218	3.78357	3.96924	4.79893	4.12049	4.42265	4.46517	3.61509	5.08387	5.03425	4.20468	4.08301	4.28816	4.69535	3.85442	4.15727	3.77693	3.7312	4.49914	4.47628	4.6768	6.30297	5.33342
TC0100000305.mm.1	1.30001	1.33224	1.36905	1.31768	1.3307	NONMMUT000718	NONMMUT000718	NA	1.22993	1.24094	1.29984	1.42072	1.30862	1.29418	1.2602	1.45667	1.31791	1.26323	1.49889	1.3098	1.40428	1.34447	1.23774	1.23166	1.4607	1.31386	1.27802	1.40204	1.37326	1.3629	1.23729
TC0100000306.mm.1	1.49071	1.4926	1.44992	1.44353	1.49601	NONMMUT000719	NONMMUT000719	NA	1.6256	1.30899	1.42937	1.54862	1.54098	1.45907	1.44308	1.46745	1.6008	1.47887	1.47092	1.33962	1.51025	1.52792	1.52254	1.41728	1.41089	1.33902	1.45275	1.4243	1.58707	1.51745	1.49846
TC0100000307.mm.1	2.47886	2.4552	2.55197	2.50717	2.5306	NONMMUT000724	NONMMUT000724	NA	2.47495	2.48979	2.50163	2.45817	2.46977	2.42372	2.40596	2.59987	2.39126	2.50837	2.57329	2.44763	2.67857	2.64371	2.53924	2.37515	2.51938	2.45836	2.52439	2.54616	2.49705	2.55206	2.53333
TC0100000308.mm.1	2.19668	2.1605	2.31929	2.21149	2.28101	Gm9915	ENSMUST00000066196	predicted gene 9915	2.31255	2.16333	2.16383	2.11383	2.22988	2.15876	2.18007	2.29883	2.00434	2.33422	2.27756	2.19341	2.47197	2.09365	2.10426	2.27417	2.23444	2.35093	2.22946	2.39822	2.18808	2.33707	2.2522
TC0100000309.mm.1	1.76254	1.74342	1.7834	1.79714	1.79074	NONMMUT000725	NONMMUT000725	NA	1.77829	1.76021	1.75365	1.77634	1.74418	1.68492	1.90182	1.65454	1.73239	1.67455	1.89744	1.76298	1.79862	1.94525	1.76942	1.67798	1.82209	1.77094	1.79	1.94458	1.77815	1.77925	1.66172
TC0100000310.mm.1	1.41019	1.50033	1.46266	1.51963	1.4379	KnowTID_00000048	KnowTID_00000048	NA	1.51156	1.23523	1.56292	1.35955	1.38166	1.47503	1.64253	1.36227	1.52147	1.30655	1.47616	1.58522	1.4827	1.63865	1.43723	1.58931	1.54061	1.39232	1.40838	1.56765	1.31487	1.52289	1.37572
TC0100000311.mm.1	1.5123	1.53883	1.59247	1.58171	1.54176	NONMMUT000739	NONMMUT000739	NA	1.51651	1.56122	1.46944	1.43896	1.57539	1.55015	1.49081	1.75282	1.36155	1.68961	1.4601	1.65832	1.56183	1.43804	1.67938	1.53973	1.54493	1.70648	1.45901	1.67099	1.58998	1.53342	1.45542
TC0100000312.mm.1	2.54727	2.55251	2.65043	2.56072	2.58085	Pou3f3	NM_008900	POU domain, class 3, transcription factor 3	2.5877	2.50186	2.54964	2.52879	2.56836	2.53582	2.5024	2.58923	2.58256	2.55332	2.62521	2.698	2.7252	2.53524	2.53805	2.58604	2.57119	2.57311	2.46449	2.70856	2.58079	2.58179	2.5686
TC0100000313.mm.1	4.01695	3.93494	3.95497	4.02543	3.98574	NONMMUT000756	NONMMUT000756	NA	4.03943	4.00409	4.18887	3.95786	3.8945	3.97828	3.88074	3.92712	3.95362	3.86253	4.06761	3.90124	3.98853	4.04184	3.95843	4.00672	4.00265	4.11752	3.96122	4.11541	3.92429	3.92091	4.00686
TC0100000314.mm.1	1.7304	1.8431	1.89281	1.90906	1.96776	KnowTID_00000049	KnowTID_00000049	NA	1.71795	1.71356	1.91916	1.78388	1.51744	1.90857	1.76638	1.83282	1.86465	1.90673	1.79178	1.92111	1.95164	1.72512	1.84149	2.0686	1.99888	1.9112	1.88336	1.91742	1.96004	2.07558	2.0024
TC0100000315.mm.1	5.66331	5.43857	5.64257	5.58654	5.62472	Mrps9	NM_023514	mitochondrial ribosomal protein S9	5.42942	5.52226	5.89729	5.82657	5.64101	5.45325	5.38086	5.39332	5.52685	5.68295	5.60295	5.60891	5.67546	5.63919	5.59421	5.57687	5.68365	5.43879	5.6399	5.34635	5.74538	5.67315	5.71884
TC0100000316.mm.1	3.75401	3.84524	3.66964	3.77039	3.71023	NONMMUT000758	NONMMUT000758	NA	3.50604	4.10007	3.86007	3.69944	3.60443	3.77698	3.87515	3.91798	3.81086	3.53495	3.71766	3.61938	3.80657	3.61692	4.01454	3.69258	3.95141	3.57648	3.47119	4.03743	3.62735	3.71987	3.69532
TC0100000317.mm.1	3.18208	3.12577	3.2426	3.25857	3.21524	Gpr45	NM_053107	G protein-coupled receptor 45	3.21123	3.1248	3.16283	3.14004	3.27152	3.19055	3.05812	3.21531	3.03909	3.17129	3.31989	3.17726	3.30195	3.37178	3.22071	3.39248	3.10653	3.20135	3.13276	3.31963	3.31688	3.14215	3.16478
TC0100000318.mm.1	0.878296	0.827381	0.875682	0.828898	0.867455	Gm24001	ENSMUST00000158463	predicted gene, 24001	0.867898	0.756092	0.898239	0.935191	0.934061	0.783239	0.837967	0.891896	0.796421	0.880426	0.84151	0.935996	0.844794	0.821045	0.852297	0.765115	0.788806	0.917229	0.870496	0.91746	0.798174	0.981822	0.769324
TC0100000319.mm.1	3.32833	3.33617	3.12339	3.23525	3.39502	8430432A02Rik	ENSMUST00000039080	RIKEN cDNA 8430432A02 gene	3.36562	3.19595	3.40274	3.41184	3.2655	3.3605	3.32393	3.372	3.28825	3.26975	2.95458	3.04715	3.22207	3.14609	3.21718	3.21133	3.21467	3.38699	3.19918	3.58632	3.5044	3.38922	3.29597
TC0100000320.mm.1	6.57146	6.78902	6.70505	6.68653	6.73817	AI597479	NM_133818	expressed sequence AI597479	6.88686	6.29606	6.50861	6.61178	6.55401	6.73215	6.70617	6.72203	6.99573	6.88766	6.63856	6.75681	6.53718	6.68089	6.89743	6.5654	6.76534	6.5236	6.9683	6.60441	6.66396	6.78444	6.66974
TC0100000321.mm.1	10.0346	9.99907	9.95606	10.0161	9.99599	Gm8210	XM_985134	predicted pseudogene 8210	9.93654	10.01	10.1912	9.99168	10.0438	10.0551	10.0094	10.0009	9.93083	10.0002	9.96265	9.9525	9.90887	10.0221	10.0464	9.95813	10.0447	10.009	10.0202	10.0236	10.0888	9.94652	9.90085
TC0100000322.mm.1	2.1486	2.13715	2.24468	2.10957	2.20808	KnowTID_00000050	KnowTID_00000050	NA	2.20364	2.01161	2.28669	1.89338	2.34768	2.12308	2.23792	1.95751	2.23011	1.92727	2.24191	2.2465	2.56305	2.25177	2.05344	2.07239	2.08736	2.08286	2.0725	2.35636	2.14803	2.30393	2.15956
TC0100000323.mm.1	4.96892	4.90581	4.86054	4.92016	4.84091	Nck2	NM_010879	non-catalytic region of tyrosine kinase adaptor protein 2	5.02852	4.91412	4.9965	4.96377	4.94168	4.82352	4.94134	4.91774	4.94064	4.89277	4.86197	4.85242	4.835	4.94138	4.87814	4.78755	4.9168	5.07694	4.81823	4.96191	4.82857	4.74447	4.85138
TC0100000324.mm.1	3.15365	3.06142	2.925	2.97885	2.84083	NONMMUT000770	NONMMUT000770	NA	2.96079	3.18108	3.43617	3.12037	3.06985	2.82501	2.95719	3.06866	3.3948	2.97626	3.22996	2.71858	2.77522	3.00716	2.86798	2.92893	2.99843	3.09174	2.5623	2.806	2.78737	2.81244	3.23604
TC0100000325.mm.1	2.73101	2.72426	2.66787	2.6738	2.68097	NONMMUT000772	NONMMUT000772	NA	2.71703	2.81246	2.59963	2.6594	2.86651	2.79503	2.69274	2.70109	2.70817	2.69467	2.80835	2.52786	2.64059	2.61271	2.69519	2.67947	2.60793	2.77373	2.51517	2.89027	2.49519	2.70959	2.79462
TC0100000326.mm.1	2.47605	2.41495	2.24189	2.38081	2.29622	NONMMUT000773	NONMMUT000773	NA	2.19155	2.66543	2.45809	2.40357	2.66162	2.05703	2.39761	2.61008	2.59508	2.49502	2.31812	2.00167	2.15276	2.53045	2.26812	2.23604	2.19484	2.67461	2.20754	2.50118	1.92322	2.40638	2.44277
TC0100000327.mm.1	4.29039	4.29412	4.16154	4.07377	4.06125	NONMMUT000774	NONMMUT000774	NA	3.83374	4.08385	4.7839	4.33698	4.41348	3.84689	4.3874	4.29555	4.64664	4.0896	4.13201	4.15515	4.26939	4.33452	4.20943	3.85347	3.83139	4.14005	4.0009	4.27291	3.89605	4.01962	4.11676
TC0100000328.mm.1	3.42406	3.3658	3.30474	3.49416	3.31733	NONMMUT000775	NONMMUT000775	NA	3.21977	3.37919	3.48516	3.52026	3.51589	3.28862	3.35773	3.40786	3.40899	3.36887	3.37036	3.333	3.14671	3.4169	3.54821	3.45115	3.42157	3.63299	3.16808	3.5632	3.22929	3.35723	3.26884
TC0100000329.mm.1	5.59033	5.80788	5.8779	5.41496	5.82119	1500015O10Rik	NM_024283	RIKEN cDNA 1500015O10 gene	5.74289	5.18057	5.8193	5.67639	5.53249	6.02865	5.57187	5.71117	5.91983	5.97195	6.17579	5.37914	5.98473	5.31341	5.58308	5.60832	5.19716	5.37285	5.69109	5.74732	6.61823	5.58631	5.463
TC0100000330.mm.1	6.02718	6.16402	6.16425	6.23835	6.45923	Gm16103	ENSMUST00000163003	predicted gene 16103	6.22975	6.15974	6.05194	5.87748	5.817	6.35597	6.30112	6.22749	5.77151	6.2409	6.17585	6.09456	6.14568	6.08766	6.1615	6.35201	6.38114	6.20946	6.47632	6.6079	6.30612	6.46827	6.43753
TC0100000331.mm.1	2.23702	2.19413	2.26848	2.2018	2.29186	Gm26352	ENSMUST00000158223	predicted gene, 26352	2.17379	2.26801	2.41505	2.24235	2.08589	2.27775	2.07919	2.09756	2.322	2.07615	2.25911	2.47172	2.26696	2.20618	2.28218	2.36444	2.27255	1.88365	2.41233	2.22896	2.28355	2.33422	2.20021
TC0100000332.mm.1	7.33674	7.15925	7.2095	7.08142	7.15208	Tpp2	NM_009418	tripeptidyl peptidase II	6.98086	7.40974	7.54191	7.33958	7.41162	7.14303	7.10469	7.09081	7.29847	7.24968	7.23395	7.22956	7.12479	7.17419	6.99837	6.9879	7.06086	7.18576	7.2035	6.94043	7.28924	7.19703	7.13018
TC0100000333.mm.1	5.81862	5.78956	5.74615	5.69089	5.81237	Bivm	NM_144558	basic, immunoglobulin-like variable motif containing	5.79054	5.76736	5.95969	5.83981	5.73569	5.71214	5.79734	5.77426	5.87452	5.78773	5.77701	5.80311	5.61674	5.63968	5.7556	5.64276	5.79663	5.61976	6.0546	5.56668	5.95939	5.70268	5.77847
TC0100000334.mm.1	5.81489	5.80615	5.81149	5.87753	5.78103	Ercc5	NM_011729	excision repair cross-complementing rodent repair deficiency, complementation group 5	5.85447	5.66103	5.73612	5.93444	5.88838	5.82947	5.77783	5.82081	5.7965	5.89896	5.82342	5.88115	5.64242	5.86887	5.90848	5.86716	5.93916	5.80398	5.88696	5.64393	5.82945	5.75958	5.78522
TC0100000335.mm.1	2.08041	2.30509	2.36124	2.21059	2.2943	NONMMUT000793	NONMMUT000793	NA	2.02266	2.10346	2.24555	2.08293	1.94743	2.13633	2.48059	2.04757	2.55586	2.41657	2.36732	2.05336	2.60771	2.30226	2.22006	2.12672	2.10742	2.29651	2.66325	2.08047	2.34104	2.0945	2.29227
TC0100000336.mm.1	3.34321	3.23612	3.18143	3.30762	3.20064	Gm15833	ENSMUST00000161563	predicted gene 15833	3.47768	3.37984	3.22795	3.4374	3.19318	3.4115	3.16915	3.3198	3.04404	3.12519	3.33576	3.15484	3.10994	3.42266	3.30425	3.31641	3.17596	3.31883	3.26012	3.31284	3.12107	3.14576	3.16341
TC0100000337.mm.1	1.52156	1.44627	1.38369	1.39149	1.39639	KnowTID_00000051	KnowTID_00000051	NA	1.28777	1.44128	1.47631	1.57675	1.82569	1.5376	1.38059	1.50746	1.35943	1.40661	1.32899	1.42928	1.36989	1.36042	1.33512	1.47642	1.293	1.49248	1.40487	1.47511	1.36917	1.3751	1.35772
TC0100000338.mm.1	6.48707	6.59625	6.58053	6.5599	6.57499	Gulp1	NM_028450	GULP, engulfment adaptor PTB domain containing 1	6.71808	6.19813	6.42026	6.76997	6.32893	6.56316	6.54278	6.57602	6.70304	6.6151	6.62492	6.65474	6.42737	6.72515	6.68201	6.54804	6.67216	6.17212	6.77571	6.41965	6.70285	6.48143	6.49529
TC0100000339.mm.1	3.32576	3.5133	3.33122	3.30574	3.20438	NONMMUT000799	NONMMUT000799	NA	3.16812	3.06621	2.87072	3.80949	3.71424	3.37765	3.30837	3.28149	4.08569	3.50448	3.46979	3.35374	2.99687	3.76495	3.63403	3.09345	3.19561	2.84065	3.49147	2.86116	2.86585	3.07515	3.72828
TC0100000340.mm.1	3.55166	3.65425	3.55379	3.58769	3.35776	NONMMUT000800	NONMMUT000800	NA	3.39326	3.19339	3.32269	4.20472	3.64425	3.62421	3.47801	3.56081	3.95396	3.47292	3.71968	3.72206	3.30051	3.78125	3.48385	3.8059	3.42537	3.4421	3.44542	3.23398	3.0626	3.48806	3.55876
TC0100000341.mm.1	3.93727	4.14217	4.15716	4.04312	3.883	NONMMUT000801	NONMMUT000801	NA	4.18037	3.83387	3.34502	4.26528	4.0618	3.94185	4.08967	4.16723	4.36992	4.3902	4.31671	4.25902	3.6627	4.2359	4.24184	4.09331	3.71137	3.93319	4.25039	3.84745	3.58408	3.55383	4.17927
TC0100000342.mm.1	3.34402	3.46978	3.29469	3.32572	3.29554	Gm16102	ENSMUST00000160955	predicted gene 16102	3.46046	3.13623	3.10097	3.5349	3.48753	3.41253	3.51629	3.27699	3.67331	3.43932	3.45554	3.22148	3.06243	3.39671	3.46569	3.48225	3.06005	3.22387	3.33338	3.35253	3.0589	3.38248	3.35042
TC0100000343.mm.1	9.28803	9.49064	9.25646	9.05035	9.2599	Col3a1	NM_009930	collagen, type III, alpha 1	9.33982	9.76277	8.97692	9.00302	9.35762	9.33272	9.51265	9.62261	9.49458	9.36303	9.21569	9.12519	9.32193	8.8159	9.26008	8.88401	9.10062	9.19113	9.18609	9.38327	9.17302	9.29431	9.2628
TC0100000344.mm.1	5.49269	5.30331	5.34544	5.48852	5.49108	AK139585	uc029qob.1	NA	5.42908	5.48539	5.52957	5.63079	5.38861	5.33856	5.53593	5.13603	5.20273	5.26882	5.57623	5.36881	5.16792	5.69285	5.50566	5.4551	5.36998	5.41902	5.55368	5.45197	5.38559	5.47741	5.58673
TC0100000345.mm.1	7.55509	7.47012	7.43499	7.5396	7.6089	AB345950	uc011wkd.2	NA	7.32616	7.68378	7.64686	7.37212	7.74654	7.18763	7.77717	7.57099	7.34468	7.52773	7.35543	7.57962	7.27718	7.27412	7.66672	7.7414	7.46743	7.54831	7.27874	7.68011	7.77649	7.49295	7.81619
TC0100000346.mm.1	7.09162	6.70726	6.75035	6.84977	6.97428	AB343474	uc029qoc.1	NA	6.55214	7.20918	7.11281	7.24531	7.33864	6.2509	7.19801	6.48499	6.89514	6.62942	6.96918	6.60315	6.79966	7.14182	6.91055	6.76789	6.65565	6.77296	6.80262	7.02854	7.16166	6.91801	6.96059
TC0100000347.mm.1	6.86886	6.65327	6.57232	6.65303	6.70527	AB353040	uc029qod.1	NA	6.25752	7.12572	6.91153	6.87412	7.17542	6.30518	7.10646	6.40564	6.79578	6.50161	6.74368	6.55469	6.48931	6.89607	6.69777	6.53625	6.61185	6.52321	6.62489	6.68884	6.79937	6.51122	6.90202
TC0100000348.mm.1	5.30342	5.24436	5.30987	5.18509	5.41975	Gm23974	ENSMUST00000083321	predicted gene, 23974	5.31605	4.90373	5.50359	5.41461	5.37913	5.28528	5.16275	5.25932	5.27009	5.26429	5.22971	5.49403	5.25145	5.13885	5.07131	5.1807	5.28851	5.24609	5.18292	5.40138	5.68948	5.43832	5.38668
TC0100000349.mm.1	2.5222	2.41264	2.36972	2.31701	2.3273	KnowTID_00000052	KnowTID_00000052	NA	2.27908	2.75798	2.55584	2.64179	2.3763	2.45584	2.35179	2.44952	2.39342	2.43844	2.13885	2.39612	2.50549	2.30368	2.27308	2.24226	2.36147	2.40458	2.30858	2.64674	2.08601	2.25254	2.34265
TC0100000350.mm.1	3.93608	3.80903	3.93747	3.91715	3.94088	Gm23984	ENSMUST00000157139	predicted gene, 23984	4.01263	3.84002	3.94354	3.86486	4.01934	4.00188	3.77652	3.82165	3.63608	3.68437	4.06292	3.86356	4.13905	3.99236	3.73594	3.92478	3.92176	4.01093	3.80567	4.22154	4.12042	3.71867	3.83812
TC0100000351.mm.1	6.29712	6.50075	6.30303	6.23316	6.28106	Wdr75	NM_028599	WD repeat domain 75	6.20254	6.31496	6.27281	6.31115	6.38412	6.38499	6.55302	6.46517	6.5998	6.38531	6.28115	6.29726	6.24841	6.12897	6.27724	6.24732	6.23511	6.27714	6.39318	6.1684	6.31241	6.21143	6.31986
TC0100000352.mm.1	6.48773	6.39357	6.33749	6.44455	6.42268	Rpl23a-ps1	ENSMUST00000085632	ribosomal protein 23A, pseudogene 1	6.43892	6.34769	6.63386	6.40704	6.61116	6.48744	6.36557	6.44284	6.27841	6.26423	6.41401	6.4337	6.23803	6.51812	6.35271	6.41621	6.48812	6.44759	6.48554	6.42044	6.5359	6.37185	6.29968
TC0100000353.mm.1	2.51964	2.58409	2.75253	2.67031	2.63737	Dnah7b	NM_001160386	dynein, axonemal, heavy chain 7B	2.62631	2.62338	2.38715	2.52028	2.44106	2.57893	2.54382	2.61182	2.60179	2.81764	2.66199	2.84904	2.68143	2.6362	2.69542	2.93837	2.71287	2.36866	2.688	2.63069	2.57587	2.69614	2.59615
TC0100000354.mm.1	7.65774	7.55446	7.40586	7.51292	7.63729	n-R5s211	ENSMUST00000093689	nuclear encoded rRNA 5S 211	7.67413	7.65958	8.01497	7.34939	7.59062	7.65415	7.52336	7.60049	7.43985	7.36197	7.46241	7.45967	7.33938	7.12434	7.30415	7.64227	7.71558	7.77826	7.32586	7.65597	7.82886	7.69977	7.67597
TC0100000355.mm.1	11.3837	11.6127	11.3586	11.4061	11.4319	Hspa8	uc007axa.1	heat shock protein 8	11.2973	11.374	11.4353	11.3813	11.4308	11.6273	11.6338	11.5403	11.6496	11.3703	11.3601	11.3065	11.3976	11.3423	11.344	11.3664	11.3077	11.6702	11.4055	11.4514	11.4131	11.4794	11.4099
TC0100000356.mm.1	2.22643	2.23844	2.35857	2.30772	2.28454	Dnah7c	XM_003084436	dynein, axonemal, heavy chain 7C	2.30238	2.24133	2.17717	2.22456	2.1867	2.2274	2.21523	2.26869	2.24244	2.36221	2.2958	2.39107	2.38521	2.28531	2.29484	2.47127	2.37086	2.1163	2.30719	2.32181	2.26571	2.3121	2.21588
TC0100000357.mm.1	11.37	11.6177	11.3581	11.3999	11.4209	Hspa8	uc007axe.1	heat shock protein 8	11.2824	11.3577	11.4224	11.3715	11.4159	11.6572	11.6345	11.5292	11.65	11.3592	11.3399	11.2942	11.439	11.3364	11.3335	11.3568	11.3002	11.6724	11.404	11.4473	11.389	11.4688	11.3953
TC0100000358.mm.1	3.04071	3.07499	3.09751	3.09067	3.24186	Gm8357	ENSMUST00000181115	predicted gene 8357	3.1859	3.04793	3.17851	2.95267	2.83852	3.27344	2.92384	3.11019	2.99248	2.94162	3.23344	2.98682	3.22816	3.03306	3.04819	3.18227	3.135	3.05485	3.00649	3.25466	3.39187	3.35216	3.20412
TC0100000359.mm.1	1.02407	1.1065	1.0629	1.04062	1.0021	Gm22693	ENSMUST00000175049	predicted gene, 22693	0.934058	0.888289	1.14109	1.09348	1.06345	1.02766	1.05892	1.07591	1.26349	1.15146	0.963561	1.11004	1.02654	1.02654	1.1569	0.958916	1.01881	1.04192	1.19332	0.85687	0.962771	1.05319	0.944333
TC0100000360.mm.1	1.30499	1.19877	1.26641	1.30868	1.28746	C230029F24Rik	XR_104575	RIKEN cDNA C230029F24 gene	1.27559	1.27185	1.32742	1.34321	1.30686	1.28605	1.28845	1.07984	1.14073	1.25829	1.36794	1.28916	1.15023	1.27949	1.22669	1.36987	1.36563	1.3017	1.3168	1.24185	1.32748	1.26795	1.28321
TC0100000361.mm.1	2.63312	2.57549	2.56943	2.68625	2.61114	KnowTID_00000053	KnowTID_00000053	NA	2.64928	2.67351	2.61873	2.65121	2.57287	2.66533	2.63088	2.38267	2.62308	2.59796	2.64451	2.37415	2.66109	2.77682	2.68879	2.67551	2.66567	2.62448	2.75518	2.49284	2.38887	2.78059	2.63824
TC0100000362.mm.1	2.12538	2.13423	2.19121	2.22889	2.2475	Gm25843	ENSMUST00000122582	predicted gene, 25843	2.21079	2.13561	2.17603	2.02598	2.07847	2.18218	2.22314	2.04314	2.08846	2.01251	2.24399	2.261	2.24732	2.20022	2.239	2.2921	2.17168	2.24146	2.34146	2.23249	2.20983	2.33106	2.12269
TC0100000363.mm.1	3.12692	3.02262	3.08622	3.02918	3.03143	KnowTID_00000054	KnowTID_00000054	NA	3.18561	2.98872	3.02432	3.18739	3.24854	2.85767	2.95967	3.05074	3.22241	2.82851	3.06757	3.16917	3.27964	2.93094	3.07001	3.06768	3.00326	3.07399	3.03869	3.00114	3.1536	2.88742	3.07627
TC0100000364.mm.1	5.52986	5.5709	5.46134	5.66948	5.67426	Tmeff2	NM_019790	transmembrane protein with EGF-like and two follistatin-like domains 2	5.44728	5.28988	5.64588	5.51417	5.75209	5.41521	5.62662	5.56832	5.67347	5.47881	5.33609	5.53632	5.49416	5.77168	5.70577	5.64112	5.48076	5.74806	5.68901	5.30892	6.13672	5.52535	5.71128
TC0100000365.mm.1	1.45093	1.41237	1.39539	1.40676	1.41539	NONMMUT000839	NONMMUT000839	NA	1.46675	1.21041	1.40339	1.4124	1.76173	1.41726	1.37058	1.60642	1.25522	1.30035	1.27086	1.37529	1.63507	1.39502	1.40157	1.37963	1.47783	1.37977	1.46343	1.42587	1.29816	1.49078	1.39871
TC0100000366.mm.1	2.58488	2.96394	2.61367	2.66483	2.66865	NONMMUT000840	NONMMUT000840	NA	2.70733	2.43597	2.12168	2.66501	2.99442	3.08767	3.21644	2.63733	2.91432	2.55163	2.94904	2.59993	2.35407	2.47867	2.76735	2.87276	2.76062	2.44476	2.80982	2.26918	2.43856	2.65877	3.16692
TC0100000367.mm.1	9.63511	9.50813	9.48754	9.61927	9.57315	Gm25736	ENSMUST00000175165	predicted gene, 25736	9.54995	9.67822	9.58415	9.60959	9.75365	9.45426	9.60578	9.46286	9.50964	9.44269	9.62245	9.49527	9.38975	9.7706	9.53197	9.62295	9.57108	9.59976	9.55229	9.57197	9.54234	9.56196	9.63719
TC0100000368.mm.1	2.975	3.46516	3.06759	3.18644	3.03695	NONMMUT000842	NONMMUT000842	NA	2.59772	2.9883	2.58015	3.17281	3.53604	3.19285	3.45674	3.21153	3.99949	3.15201	2.98695	3.38818	2.74323	3.12203	3.29682	3.36994	3.0444	3.099	3.20473	2.70387	2.67802	2.67582	3.9223
TC0100000369.mm.1	1.97459	1.9913	1.9799	1.97415	1.91387	NONMMUT000843	NONMMUT000843	NA	1.83869	1.77873	1.609	2.1634	2.48312	1.98417	2.18864	1.76088	2.03153	1.91708	2.05762	2.15841	1.7865	1.9374	2.04103	2.06814	1.82607	1.9981	1.87772	1.61324	1.77107	1.93275	2.37455
TC0100000370.mm.1	2.9125	3.30349	3.1934	3.15321	3.08208	NONMMUT000844	NONMMUT000844	NA	2.97637	2.54961	2.61249	3.08997	3.33406	3.31353	3.39344	3.06992	3.4371	3.05349	3.15001	3.52936	3.04075	3.25353	3.50612	2.96314	2.94696	3.09631	3.093	3.12892	2.87624	3.0635	3.24873
TC0100000371.mm.1	2.34511	2.40271	2.47148	2.27496	2.30863	KnowTID_00000056	KnowTID_00000056	NA	2.18839	2.35081	2.41667	2.15961	2.61009	2.53276	2.25438	2.287	2.5367	2.18138	2.47234	2.62598	2.60622	2.44929	2.26249	2.10316	2.17805	2.3818	2.50459	2.28773	2.38849	2.05881	2.30353
TC0100000372.mm.1	8.23017	8.02238	8.17252	8.08476	8.10654	Sdpr	NM_138741	serum deprivation response	8.18136	7.87976	8.40359	8.24498	8.44114	7.94282	7.97363	8.09283	8.08023	8.33832	8.03797	8.16578	8.14801	8.27731	8.14366	7.97061	8.05494	7.97729	8.0102	7.77946	8.42072	8.05457	8.26773
TC0100000373.mm.1	1.58763	1.56981	1.60916	1.64409	1.52341	NONMMUT000848	NONMMUT000848	NA	1.69754	1.47981	1.66706	1.57594	1.51779	1.55474	1.55206	1.47977	1.69269	1.54214	1.74673	1.57773	1.57006	1.75305	1.40587	1.65135	1.81013	1.60004	1.54928	1.53369	1.64197	1.53821	1.35391
TC0100000374.mm.1	3.77057	3.26745	3.13678	3.35013	3.26171	Stat4	NM_011487	signal transducer and activator of transcription 4	3.04929	4.36304	4.18077	3.53641	3.72337	3.27286	3.28654	3.26426	3.24614	3.12631	3.19042	3.09665	3.13375	3.20614	3.13695	2.94076	3.72077	3.74604	3.26535	3.11965	3.44501	3.18002	3.29852
TC0100000375.mm.1	7.80865	7.86291	7.78858	7.68771	7.93164	Stat1	NM_001205313	signal transducer and activator of transcription 1	7.78236	8.01505	8.12926	7.46171	7.65488	7.82602	8.0389	7.69489	7.89182	7.71355	7.71689	7.79155	7.93234	7.6455	7.45651	7.51383	7.92451	7.89818	7.83728	7.73709	8.0082	8.03484	8.04081
TC0100000376.mm.1	3.58172	3.42348	3.54476	3.35416	3.4095	NONMMUT000870	NONMMUT000870	NA	3.45839	3.8036	3.62206	3.70357	3.32099	3.31882	3.22295	3.4154	3.73675	3.663	3.54502	3.78711	3.1839	3.569	3.21809	3.19704	3.39475	3.39191	3.45235	3.23739	3.52982	3.42395	3.404
TC0100000377.mm.1	1.6221	1.70463	1.72183	1.53561	1.67967	KnowTID_00000057	KnowTID_00000057	NA	1.5844	1.81559	1.46742	1.65378	1.58934	1.84741	1.66126	1.80216	1.5077	1.66162	1.61326	1.83855	1.7739	1.57331	1.43834	1.58624	1.47016	1.61001	1.66557	1.88922	1.61028	1.71825	1.51502
TC0100000378.mm.1	2.09584	2.0825	2.07596	2.07372	1.91409	KnowTID_00000058	KnowTID_00000058	NA	1.91224	2.38996	1.87376	1.99789	2.30537	2.03704	1.95031	2.17932	2.16333	1.98039	2.18203	2.26023	1.88117	2.22837	2.08891	1.97904	2.18721	1.88509	2.01415	2.11444	1.86565	1.62384	1.95236
TC0100000379.mm.1	2.53375	2.5275	2.59875	2.55381	2.49037	KnowTID_00000059	KnowTID_00000059	NA	2.51937	2.56602	2.58909	2.50632	2.48796	2.6223	2.52669	2.50285	2.45818	2.52264	2.57338	2.57192	2.72708	2.6352	2.55773	2.52063	2.59872	2.45678	2.42322	2.5468	2.55085	2.42834	2.50265
TC0100000380.mm.1	4.50331	4.41445	4.52213	4.48739	4.36024	Tmem194b	NM_001142647	transmembrane protein 194B	4.49082	4.53604	4.46797	4.51201	4.5097	4.59759	4.41602	4.40552	4.23866	4.45506	4.58815	4.59267	4.45265	4.54472	4.60097	4.45963	4.42679	4.40484	4.50165	4.28094	4.3728	4.22743	4.41838
TC0100000381.mm.1	5.78863	5.54558	5.70179	5.79753	5.95721	Hibch	NM_146108	3-hydroxyisobutyryl-Coenzyme A hydrolase	5.65717	5.37565	5.62552	6.25142	6.03339	5.54482	5.67409	5.4619	5.50152	5.86304	5.56733	5.84458	5.53223	5.85984	5.74615	5.79782	5.92738	5.65645	5.96198	5.66205	5.82239	5.99306	6.34659
TC0100000382.mm.1	2.98039	2.93027	3.24307	3.10715	2.97539	NONMMUT000902	NONMMUT000902	NA	2.87211	3.13097	2.80015	2.88185	3.21686	3.01803	2.9054	2.93208	2.86557	3.28242	3.31371	3.03429	3.34185	3.37481	2.95503	3.1254	3.02303	3.05747	2.94292	3.21593	2.82545	2.96875	2.92393
TC0100000383.mm.1	1.53539	1.5811	1.54366	1.59079	1.578	Mstn	NM_010834	myostatin	1.50151	1.41357	1.5621	1.64173	1.55805	1.54387	1.43015	1.6306	1.71976	1.52484	1.53819	1.50086	1.61076	1.68782	1.7094	1.43619	1.51925	1.60132	1.4026	1.75476	1.71829	1.5213	1.49304
TC0100000384.mm.1	1.87659	1.95345	1.96294	1.94076	1.95434	Gm24349	ENSMUST00000158709	predicted gene, 24349	1.9016	1.89619	1.99774	1.89412	1.69331	2.00667	1.93522	1.95755	1.91437	1.70646	2.07428	1.99456	2.07649	1.8822	1.87401	2.01277	2.02228	1.91254	2.04604	1.9068	1.96654	1.75956	2.09275
TC0100000385.mm.1	1.33107	1.35156	1.36122	1.35547	1.34774	NONMMUT000907	NONMMUT000907	NA	1.25345	1.48221	1.24503	1.34137	1.33331	1.37353	1.39065	1.44007	1.20198	1.3044	1.30341	1.3723	1.46475	1.35936	1.39354	1.46383	1.30172	1.25888	1.35819	1.34746	1.34884	1.33267	1.35154
TC0100000386.mm.1	4.30125	4.22493	4.2494	4.23218	4.26591	Ormdl1	NM_145517	ORM1-like 1 (S. cerevisiae)	4.27623	4.25457	4.52241	4.15278	4.30027	4.30396	4.13223	4.14567	4.31787	4.30008	4.20452	4.3096	4.18341	4.19701	4.11932	4.16126	4.27175	4.41155	4.30169	4.12292	4.36864	4.26944	4.26687
TC0100000387.mm.1	5.16292	5.13277	5.15747	5.20507	5.1692	Osgepl1	NM_001285839	O-sialoglycoprotein endopeptidase-like 1	5.19434	4.98965	5.15323	5.23972	5.23767	5.13422	5.09765	5.1748	5.1244	5.21624	5.24341	5.17255	4.99767	5.22836	5.30918	5.26553	5.2996	4.92269	5.21103	5.03572	5.19633	5.17437	5.22853
TC0100000388.mm.1	1.54253	1.70676	1.62197	1.62996	1.58845	KnowTID_00000060	KnowTID_00000060	NA	1.69128	1.5567	1.44343	1.49428	1.52695	1.70262	1.56776	1.68931	1.86735	1.45328	1.64123	1.69269	1.70068	1.43444	1.5277	1.71477	1.7291	1.74378	1.51787	1.86813	1.53831	1.44522	1.57272
TC0100000389.mm.1	2.41454	2.43629	2.38291	2.38248	2.35236	Mir7681	NR_106149	microRNA mir-7681	2.48621	2.5856	2.42729	2.41095	2.16267	2.54628	2.18404	2.61214	2.4027	2.63349	2.24882	2.47854	2.17077	2.52578	2.52785	2.42213	2.20996	2.22666	2.41234	2.5552	2.55218	2.00132	2.24075
TC0100000390.mm.1	1.74255	1.70024	1.76638	1.75278	1.73032	Ccdc150	NM_030025	coiled-coil domain containing 150	1.74609	1.69838	1.75362	1.74805	1.76662	1.71938	1.69982	1.70377	1.67797	1.74529	1.71275	1.79514	1.81231	1.77204	1.7422	1.77639	1.71222	1.76105	1.68202	1.82486	1.71506	1.6861	1.74356
TC0100000391.mm.1	1.82952	1.83041	1.85975	1.85399	1.85786	4930444A19Rik	uc007azt.1	RIKEN cDNA 4930444A19 gene	1.7249	1.92024	1.77123	1.82087	1.91035	1.82736	1.80613	1.8331	1.85507	1.80413	1.91087	1.87887	1.84511	1.85802	1.80763	1.8895	1.86493	1.84988	1.82174	1.92709	1.81386	1.84593	1.88066
TC0100000392.mm.1	1.91516	1.75848	1.75652	1.82968	1.94228	Gm24053	ENSMUST00000158620	predicted gene, 24053	1.93582	1.9043	1.90177	1.79306	2.04083	1.73212	1.88691	1.64802	1.76685	1.73118	1.91802	1.61919	1.75771	2.02698	1.73337	1.7433	1.85904	1.78567	1.96184	1.99933	2.17662	1.63847	1.93516
TC0100000393.mm.1	6.68348	6.72057	7.16772	6.4994	6.73876	Coq10b	NM_001039710	coenzyme Q10 homolog B (S. cerevisiae)	6.64247	6.73033	6.70788	6.78145	6.55529	6.66431	6.69096	6.62061	6.90641	7.2673	7.11492	7.22164	7.06702	6.56824	6.43965	6.42647	6.43785	6.62482	6.83568	6.54471	6.89431	6.82441	6.59466
TC0100000394.mm.1	3.27871	3.10129	3.43957	2.95216	3.10942	NONMMUT000952	NONMMUT000952	NA	2.72358	3.79813	3.46908	3.17867	3.22406	2.71594	3.14154	3.21859	3.32909	3.5739	3.61627	3.4149	3.15323	2.83429	3.38833	3.07075	2.53903	2.92843	2.97912	3.2518	3.02993	3.04108	3.24519
TC0100000395.mm.1	6.67231	6.84628	6.60292	6.61422	6.79441	Hspe1	NM_008303	heat shock protein 1 (chaperonin 10)	6.58314	6.49914	6.79722	6.70233	6.77974	6.8832	6.87905	6.76566	6.8572	6.65815	6.52954	6.60086	6.62313	6.58441	6.48043	6.5453	6.6713	6.78966	6.71113	6.71391	6.89235	6.83516	6.81947
TC0100000396.mm.1	6.62843	6.64766	6.5502	6.6181	6.4963	Gm16581	ENSMUST00000160730	predicted gene 16581	6.64946	6.68758	6.40834	6.70687	6.68987	6.69008	6.63653	6.70898	6.55504	6.55905	6.49272	6.57975	6.56927	6.7063	6.69174	6.59846	6.57962	6.51439	6.5539	6.66357	6.32455	6.40172	6.53778
TC0100000397.mm.1	7.55447	7.65522	7.70511	7.50173	7.57678	Mob4	NM_025283	MOB family member 4, phocein	7.53712	7.39449	7.59606	7.71535	7.52934	7.5425	7.62644	7.62326	7.82866	7.71618	7.72638	7.76431	7.61357	7.53512	7.46299	7.54815	7.49345	7.46894	7.66077	7.31018	7.76647	7.56543	7.58106
TC0100000398.mm.1	5.35813	5.57375	5.52446	5.44218	5.38475	Gm10561	ENSMUST00000181563	predicted gene 10561	5.50724	5.25164	5.17745	5.39836	5.45595	5.32282	5.56022	5.71711	5.69485	5.6492	5.48723	5.48053	5.4809	5.5075	5.54039	5.28519	5.42553	5.45231	5.71496	5.40133	5.20908	5.27562	5.32276
TC0100000399.mm.1	4.13828	4.46568	4.18917	4.17089	4.17553	Mars2	NM_175439	methionine-tRNA synthetase 2 (mitochondrial)	4.19899	4.09786	3.79733	4.40402	4.19317	4.25884	4.59813	4.2995	4.70626	4.3655	4.07473	4.09169	4.22476	4.026	4.17338	4.01876	4.22183	4.41447	4.35669	4.03355	4.06413	4.10639	4.31688
TC0100000400.mm.1	3.64512	3.98559	3.7569	3.57608	3.55859	KnowTID_00000061	KnowTID_00000061	NA	3.40577	3.57765	3.46635	3.90664	3.86917	3.5897	4.08577	3.8773	4.38959	3.85305	3.47547	4.16834	3.53073	3.34054	3.62372	3.65182	3.56805	3.69626	3.73761	3.38499	3.60865	3.14651	3.91521
TC0100000401.mm.1	2.52372	2.86492	2.71006	2.58329	2.5884	KnowTID_00000062	KnowTID_00000062	NA	2.43149	2.38421	2.45622	2.78057	2.5661	2.58074	2.76022	2.87076	3.24794	2.66036	2.72931	2.96492	2.48566	2.46149	2.70745	2.65902	2.41009	2.6784	2.64414	2.49211	2.4561	2.74002	2.60964
TC0100000402.mm.1	1.69275	1.68765	1.74121	1.68502	1.75715	NONMMUT000963	NONMMUT000963	NA	1.60337	1.88169	1.65042	1.56134	1.76695	1.62935	1.68654	1.62487	1.80982	1.63272	1.85847	1.74742	1.72622	1.58383	1.73599	1.83912	1.70209	1.56409	1.6547	1.69895	1.86624	1.84992	1.71594
TC0100000403.mm.1	6.62576	6.45859	6.54773	6.57897	6.58385	Gm8292	ENSMUST00000135190	predicted gene 8292	6.52249	6.55153	6.86062	6.55595	6.63824	6.54938	6.52157	6.50304	6.26035	6.48482	6.57639	6.47223	6.65748	6.73087	6.51837	6.51056	6.55506	6.57998	6.56841	6.60198	6.79969	6.51394	6.4352
TC0100000404.mm.1	5.61893	5.83478	5.7078	5.7702	5.49022	Plcl1	NM_001114663	phospholipase C-like 1	5.73367	5.31295	5.11886	6.04873	5.88046	5.85722	5.73511	5.67413	6.07263	5.70547	5.66521	5.77739	5.68314	5.68626	5.86301	5.84198	5.71723	5.74253	5.65908	5.39891	5.35825	5.50568	5.52917
TC0100000405.mm.1	4.20348	4.5399	4.28528	4.21095	4.1063	NONMMUT000966	NONMMUT000966	NA	4.05992	4.37991	3.76352	4.78206	4.03201	4.29802	4.54855	4.43496	4.87807	4.30454	4.44911	4.33971	4.04776	4.25109	4.33737	4.47185	4.10929	3.88515	4.04935	4.10018	3.81478	4.15535	4.41186
TC0100000406.mm.1	4.42046	4.51526	4.63256	4.38835	4.36687	NONMMUT000967	NONMMUT000967	NA	4.36901	4.3877	3.9142	4.94655	4.48486	4.38577	4.51594	4.21741	4.94191	4.65801	4.59883	4.75596	4.51745	4.3818	4.41397	4.69116	4.30942	4.14542	4.34971	4.41973	3.96457	4.30519	4.79514
TC0100000407.mm.1	4.42867	4.77036	4.69764	4.53786	4.58071	NONMMUT000968	NONMMUT000968	NA	4.31164	4.5365	3.68143	5.06507	4.54871	4.59119	4.8418	4.54699	5.10145	4.81499	4.80442	4.8599	4.31124	4.45252	4.54899	4.58279	4.50247	4.60256	4.42755	4.49314	4.50586	4.39208	5.08494
TC0100000408.mm.1	2.53342	2.83749	2.71799	2.62243	2.58419	NONMMUT000970	NONMMUT000970	NA	2.51739	2.53144	2.2387	2.80179	2.57778	2.77612	2.81417	2.66122	3.09846	2.93857	2.59158	2.76611	2.57568	2.62567	2.46805	2.66934	2.60959	2.73949	2.80853	2.58087	2.29025	2.53059	2.7107
TC0100000409.mm.1	3.78684	3.86988	3.76308	3.73748	3.69949	NONMMUT000971	NONMMUT000971	NA	3.61644	3.85822	3.55878	4.1485	3.75226	3.67251	3.9027	3.95929	3.94501	3.64052	3.75053	4.18856	3.47269	3.75282	3.78273	4.0132	3.38083	3.75782	3.75898	3.92419	3.55415	3.6782	3.58195
TC0100000410.mm.1	3.79035	3.75599	3.92921	3.78145	3.81022	NONMMUT000973	NONMMUT000973	NA	3.64421	3.65197	3.52363	4.25092	3.88099	3.59693	3.98162	3.7068	3.73863	4.00761	3.87282	3.68985	4.14654	3.78093	3.85224	3.65811	3.8428	3.77316	3.95739	3.50014	3.83632	3.69274	4.0645
TC0100000411.mm.1	3.51844	4.02599	3.81701	3.68479	3.69273	NONMMUT000974	NONMMUT000974	NA	3.21034	3.40478	2.98577	4.31395	3.67738	3.89095	4.01732	3.81788	4.37782	3.63827	3.81736	4.15023	3.6622	3.86372	3.70062	3.75782	3.45826	3.64357	3.48349	3.7208	3.38868	4.04388	3.82682
TC0100000412.mm.1	2.03012	2.10004	2.16655	1.87297	1.8404	NONMMUT000975	NONMMUT000975	NA	1.86723	2.0068	1.56936	2.47824	2.22895	2.03101	2.11661	1.66731	2.58523	2.12248	2.0379	2.64633	1.8595	1.97367	1.92899	1.93763	1.81788	1.7067	1.72588	2.07212	1.72328	1.89662	1.78409
TC0100000413.mm.1	2.45249	2.47594	2.53198	2.48748	2.55299	KnowTID_00000063	KnowTID_00000063	NA	2.40121	2.64755	2.37309	2.36239	2.4782	2.37108	2.50604	2.37728	2.64936	2.44635	2.57016	2.43122	2.68019	2.55836	2.52922	2.41513	2.56259	2.37209	2.67348	2.35791	2.58764	2.47392	2.67202
TC0100000414.mm.1	1.85374	1.81444	1.82084	1.87062	1.87343	9130227L01Rik	NR_045837	RIKEN cDNA 9130227L01 gene	1.9044	1.86542	1.76193	1.84898	1.88796	1.82812	1.83606	1.82209	1.77147	1.72594	1.89002	1.76237	1.90505	1.9011	1.81754	1.91099	1.87372	1.84977	1.83667	1.87444	1.91207	1.85764	1.88636
TC0100000415.mm.1	2.26131	2.21634	2.30927	2.23078	2.27524	1700003I22Rik	uc007baq.1	RIKEN cDNA 1700003I22 gene	2.24763	2.31816	2.12646	2.30899	2.30533	2.3019	2.08405	2.24578	2.23365	2.1715	2.13649	2.54423	2.38487	2.18461	2.18252	2.19456	2.38018	2.21202	2.27348	2.43293	2.25666	2.23525	2.17788
TC0100000416.mm.1	1.5281	1.41574	1.60062	1.52025	1.46632	KnowTID_00000067	KnowTID_00000067	NA	1.54909	1.63534	1.44964	1.46293	1.54352	1.42362	1.34925	1.43801	1.45208	1.44571	1.40955	1.67438	1.87284	1.50155	1.32127	1.62858	1.57825	1.57161	1.4755	1.52966	1.47608	1.37632	1.47406
TC0100000417.mm.1	2.93114	2.87806	2.89164	2.92987	2.9217	9130024F11Rik	NR_024325	RIKEN cDNA 9130024F11 gene	2.91483	2.89998	2.88836	3.00821	2.94433	2.91753	2.8936	2.93025	2.77087	2.77299	2.94375	2.95757	2.89224	2.88693	2.89567	2.88314	3.04506	2.93856	2.92668	2.96965	2.93701	2.89556	2.8796
TC0100000418.mm.1	2.77233	2.7633	2.80554	2.8168	2.82072	NONMMUT000989	NONMMUT000989	NA	2.8519	2.82911	2.87135	2.62681	2.68247	2.73552	2.66086	2.78731	2.86949	2.67966	2.76971	2.79806	2.97475	2.97111	2.78277	2.79483	2.76049	2.77479	2.62299	3.10686	2.65541	3.0746	2.64376
TC0100000419.mm.1	1.24285	1.4674	1.35641	1.30358	1.28727	KnowTID_00000068	KnowTID_00000068	NA	1.34234	1.06157	1.29169	1.16137	1.35726	1.49328	1.42277	1.53339	1.42016	1.3092	1.39954	1.40677	1.31013	1.26879	1.43381	1.17314	1.19399	1.44817	1.35201	1.39007	1.10883	1.26916	1.31628
TC0100000420.mm.1	4.70164	4.71272	4.66921	4.62815	4.6868	1700066M21Rik	NM_028546	RIKEN cDNA 1700066M21 gene	4.71637	4.50948	4.85227	4.74686	4.68324	4.6359	4.63423	4.85458	4.72616	4.71384	4.6502	4.65537	4.65741	4.61546	4.39486	4.69925	4.67352	4.75767	4.62262	4.57363	4.91448	4.68249	4.64079
TC0100000422.mm.1	5.47968	5.54139	5.55617	5.45422	5.46138	9430016H08Rik	NM_001081181	RIKEN cDNA 9430016H08 gene	5.52795	5.29355	5.43494	5.65463	5.48732	5.51082	5.51973	5.50136	5.63366	5.70297	5.58345	5.5699	5.36835	5.45745	5.51251	5.35183	5.54686	5.40245	5.55674	5.25088	5.53917	5.45026	5.50985
TC0100000423.mm.1	2.8181	2.72277	2.72648	2.77643	2.97562	Gm24014	ENSMUST00000157728	predicted gene, 24014	2.83333	3.00392	2.7426	2.72444	2.78621	2.71577	2.78978	2.7685	2.61701	2.69885	2.66804	2.78042	2.75861	2.81039	2.64865	2.92569	2.78405	2.71337	3.0036	3.12599	3.00799	2.81142	2.92908
TC0100000424.mm.1	5.84144	6.20607	6.14312	6.00245	6.03991	Spats2l	NM_001164566	spermatogenesis associated, serine-rich 2-like	6.43011	5.56327	5.54025	6.05702	5.61657	6.22595	6.11084	6.11959	6.36789	6.11277	6.24517	6.17347	6.04108	6.10118	6.1267	5.96905	6.07815	5.73716	6.23019	6.17665	5.86743	6.01979	5.90552
TC0100000425.mm.1	3.15366	3.65219	3.5861	3.48226	3.29054	NONMMUT001008	NONMMUT001008	NA	3.19898	3.09115	2.83165	3.38914	3.25737	3.2667	3.61824	3.61812	4.10571	3.66609	3.48497	3.56732	3.62602	3.6934	3.59662	3.4289	3.37677	3.3156	3.01792	3.51353	3.09527	3.06964	3.75633
TC0100000426.mm.1	3.67434	3.51716	3.51851	3.52807	3.49754	Sgol2	NM_001177867	shugoshin-like 2 (S. pombe)	3.51194	3.76859	3.73425	3.71889	3.63802	3.5012	3.48857	3.5481	3.53076	3.53178	3.58108	3.50782	3.45336	3.28113	3.63687	3.50384	3.7287	3.48979	3.66931	3.4714	3.56992	3.49994	3.27711
TC0100000427.mm.1	6.02139	6.16596	6.19157	6.26214	6.13819	Aox1	NM_009676	aldehyde oxidase 1	6.24286	5.95328	5.6181	6.20886	6.08383	6.28283	6.17387	5.98613	6.22101	6.31656	6.07195	6.31868	6.0591	6.35224	6.44365	6.41015	6.44611	5.65854	6.35178	6.02141	5.80668	6.10852	6.40255
TC0100000428.mm.1	3.49718	3.23929	3.34635	3.4143	3.47191	Aox3	NM_023617	aldehyde oxidase 3	3.51299	3.31775	3.64231	3.59503	3.41782	3.47436	3.18661	3.15892	3.13728	3.29789	3.26889	3.56947	3.24915	3.7266	3.32623	3.31157	3.49857	3.20855	3.47268	3.18934	3.88178	3.28606	3.52968
TC0100000429.mm.1	2.48637	2.26591	2.36685	2.43992	2.4522	NONMMUT001020	NONMMUT001020	NA	2.35565	2.61423	2.88306	2.33517	2.24374	2.34877	2.27772	2.30356	2.13359	2.38398	2.239	2.65808	2.18634	2.5722	2.46044	2.2971	2.73271	2.13718	2.46422	2.14641	2.67399	2.22002	2.75638
TC0100000430.mm.1	2.0815	2.06324	2.13899	2.11915	2.1157	Aox4	NM_023631	aldehyde oxidase 4	2.08602	2.07563	2.09517	2.03887	2.11179	2.11716	2.04375	2.11526	1.97681	2.07348	2.11745	2.06967	2.29536	2.22608	2.06837	2.10311	2.11	2.08818	2.05977	2.24317	2.09286	2.08054	2.10215
TC0100000431.mm.1	2.49403	2.47058	2.53747	2.52954	2.52072	Aox2	NM_001008419	aldehyde oxidase 2	2.5815	2.42401	2.52063	2.46747	2.47654	2.56121	2.47002	2.49999	2.35112	2.3921	2.57877	2.50555	2.67345	2.62732	2.53661	2.51705	2.51149	2.45526	2.47751	2.60117	2.52615	2.50972	2.48905
TC0100000432.mm.1	7.43878	7.33043	7.36365	7.39713	7.34259	NONMMUT001024	NONMMUT001024	NA	7.03278	7.5949	7.41836	7.6136	7.53426	7.23833	7.53611	7.27044	7.27686	7.2554	7.60959	7.35183	7.23777	7.60879	7.30229	7.43338	7.25486	7.38634	7.31107	7.25369	7.29678	7.30357	7.54783
TC0100000433.mm.1	8.98626	8.89967	8.9273	8.80208	8.94486	Bzw1	NM_025824	basic leucine zipper and W2 domains 1	8.80472	9.00345	9.18098	8.92029	9.02187	8.82745	8.84189	8.86249	9.06684	9.04089	8.9307	8.93217	8.80542	8.76916	8.75375	8.76433	8.76585	8.95729	9.04088	8.6948	9.17107	8.91265	8.90491
TC0100000434.mm.1	4.94708	5.11677	5.00609	4.95213	5.08854	Nif3l1	NM_022988	Ngg1 interacting factor 3-like 1 (S. pombe)	5.04885	4.98511	4.90023	4.88071	4.9205	5.10424	5.14637	5.13279	5.0837	5.07788	4.94932	5.01165	4.98549	4.76769	4.99836	5.01024	4.98553	4.99885	5.17183	5.0871	5.15595	4.99394	5.03391
TC0100000435.mm.1	2.29597	2.2171	2.25859	2.2411	2.19371	Gm15834	XR_104582	predicted gene 15834	2.23648	2.33957	2.27158	2.38042	2.25178	2.25104	2.15059	2.17258	2.29419	2.25124	2.2801	2.28781	2.21521	2.30891	2.16844	2.24526	2.25505	2.22783	2.12632	2.25722	2.17687	2.1594	2.24873
TC0100000436.mm.1	6.59872	6.68431	6.78213	6.70007	6.88992	Ndufb3	NM_025597	NADH dehydrogenase (ubiquinone) 1 beta subcomplex 3	6.66189	6.2488	6.57199	6.82297	6.68796	6.57294	6.75192	6.7038	6.70858	6.94281	6.69391	6.84664	6.64516	6.48179	6.7122	6.65339	6.92145	6.73153	6.99591	6.70846	6.82727	6.83803	7.0799
TC0100000437.mm.1	7.69074	7.49851	7.64484	7.45887	7.60641	Gm6917	ENSMUST00000081455	predicted gene 6917	7.515	7.38698	8.06346	7.79434	7.69392	7.43611	7.44093	7.47293	7.64407	7.58429	7.64541	7.66119	7.68847	7.62204	7.42597	7.30881	7.52037	7.41715	7.65923	7.10989	8.13087	7.51984	7.6122
TC0100000438.mm.1	4.04144	4.2557	4.19011	4.15871	4.23206	Gm20257	NR_045007	caspase 8 pseudogene	4.22264	4.00678	3.94662	4.08626	3.94489	4.16233	4.20972	4.1612	4.48957	4.3378	4.18174	4.35524	3.88565	4.03805	4.34306	4.13381	4.24297	4.03569	4.26103	4.31067	4.12591	4.19127	4.27141
TC0100000439.mm.1	7.35909	7.42921	7.39384	7.31744	7.28369	Cflar	NM_001289704	CASP8 and FADD-like apoptosis regulator	7.28999	7.40836	7.2563	7.44904	7.39175	7.36912	7.42716	7.38953	7.53103	7.38988	7.40721	7.42476	7.3535	7.37385	7.36814	7.14759	7.27197	7.42567	7.43377	7.20619	7.1409	7.32692	7.31068
TC0100000440.mm.1	7.91972	7.9281	7.83555	7.7646	7.87218	Casp8	NM_001080126	caspase 8	7.80032	8.05375	8.26164	7.74691	7.73596	7.97757	7.91734	7.9352	7.88229	7.87439	7.8607	7.7921	7.81501	7.72944	7.82213	7.48392	7.94089	7.84662	7.90132	7.8598	8.07534	7.82447	7.69995
TC0100000441.mm.1	4.29491	4.19526	4.00134	4.16664	4.19101	NONMMUT001065	NONMMUT001065	NA	3.77587	4.64198	4.31731	4.42689	4.31251	4.10689	4.20395	4.15655	4.31366	4.11086	4.36992	3.71074	3.81383	4.07681	4.02336	4.05193	4.20527	4.47585	4.15643	4.37063	4.0792	3.94634	4.40243
TC0100000442.mm.1	4.97544	5.00744	4.96374	5.0311	5.15439	Stradb	NM_172656	STE20-related kinase adaptor beta	4.968	4.8743	4.9121	5.04842	5.0744	5.003	5.00428	4.91521	5.10728	5.16641	4.80357	5.0288	4.85617	4.95469	5.04138	4.94919	5.05763	5.15261	5.12075	5.15842	4.95554	5.1868	5.35044
TC0100000443.mm.1	1.74151	1.63901	1.87675	1.7219	1.9908	Gm25502	ENSMUST00000104428	predicted gene, 25502	1.72194	1.46931	1.85696	1.86502	1.79431	1.74347	1.68392	1.56583	1.56281	1.73999	1.88662	2.03766	1.84272	1.54936	1.81321	1.71757	1.9067	1.62268	1.98376	1.91078	2.38231	1.72943	1.94771
TC0100000444.mm.1	3.99172	3.96865	4.0428	4.07942	4.05875	G730003C15Rik	ENSMUST00000180570	RIKEN cDNA G730003C15 gene	4.06503	3.93951	3.92883	3.97177	4.05344	4.01393	3.9367	3.91751	4.00646	3.87775	4.09093	4.0126	4.18993	4.11157	3.97276	4.02469	3.98074	4.30734	4.13598	4.13808	4.10848	3.99477	3.91644
TC0100000445.mm.1	1.70215	1.65506	1.75528	1.75668	1.77669	NONMMUT001076	NONMMUT001076	NA	1.63582	1.67533	1.61045	1.81119	1.77798	1.55953	1.64922	1.653	1.75848	1.83043	1.61678	1.79066	1.78324	1.56417	1.82787	2.06241	1.6505	1.67845	1.69489	1.83381	1.74769	1.90999	1.69705
TC0100000446.mm.1	2.25656	2.3112	2.42592	2.39726	2.29947	NONMMUT001077	NONMMUT001077	NA	2.37031	2.17567	2.37875	2.0396	2.31847	2.28185	2.24317	2.37116	2.34863	2.35965	2.44374	2.27242	2.62788	2.55365	2.19353	2.51307	2.24003	2.48601	2.29684	2.33986	2.22757	2.29414	2.33892
TC0100000447.mm.1	2.64935	2.64475	2.56842	2.64969	2.675	Cdk15	NM_001033373	cyclin-dependent kinase 15	2.58045	2.63696	2.7529	2.71481	2.56163	2.72711	2.65661	2.62607	2.56919	2.50408	2.52293	2.51635	2.73033	2.67922	2.61038	2.72545	2.62628	2.60714	2.64537	2.82646	2.66334	2.67792	2.5619
TC0100000448.mm.1	1.79893	1.7541	1.73413	1.7858	1.7261	NONMMUT001081	NONMMUT001081	NA	1.70137	1.58634	1.8564	1.9393	1.91125	1.7702	1.74581	1.84856	1.65181	1.49685	1.76013	1.78031	1.89924	1.75972	1.76793	1.94417	1.77995	1.67723	1.64936	1.73872	1.87063	1.60399	1.76781
TC0100000449.mm.1	2.07157	2.1984	2.24213	2.1653	2.20049	NONMMUT001082	NONMMUT001082	NA	2.24263	2.09295	2.13163	1.82965	2.061	2.16183	2.28149	2.15091	2.19937	2.11042	2.22315	2.4283	2.20668	2.21638	2.12876	2.1825	2.14584	2.15301	1.91918	2.33473	2.81902	2.01651	1.91303
TC0100000450.mm.1	7.13602	7.24203	7.25945	7.24151	7.00876	Fzd7	NM_008057	frizzled homolog 7 (Drosophila)	7.38811	7.13413	6.77507	7.20016	7.18264	7.1631	7.19389	7.35265	7.2585	7.27451	7.19056	7.28073	7.29198	7.37354	7.18962	7.10557	7.0735	7.46533	7.13994	7.15869	6.59015	7.151	7.00401
TC0100000451.mm.1	2.14957	2.18148	2.19729	2.26471	2.18782	NONMMUT001088	NONMMUT001088	NA	2.16721	2.03523	2.21202	2.19232	2.14108	2.15742	2.05592	2.36216	2.15042	2.18514	2.12485	2.21587	2.2633	2.32861	2.43038	2.23041	2.15169	2.18247	2.052	2.36477	2.33531	2.09413	2.09291
TC0100000452.mm.1	4.05661	4.05979	4.14625	4.14031	4.02961	Gm973	NM_001013771	predicted gene 973	4.10289	4.04385	4.02602	3.95972	4.15055	4.0006	4.00445	4.30965	3.92445	4.2084	4.14473	4.18433	4.04752	4.50582	4.12233	4.0294	4.17765	3.86637	4.13539	4.01239	4.02665	4.07177	3.90185
TC0100000453.mm.1	2.27716	2.25487	2.31086	2.33981	2.23029	Gm24545	ENSMUST00000158651	predicted gene, 24545	2.38576	2.2084	2.41164	2.18908	2.19092	2.28461	2.17241	2.29312	2.26933	2.3022	2.19445	2.30181	2.44499	2.37561	2.26733	2.3953	2.35232	2.30851	2.19276	2.32292	2.21267	2.19252	2.23056
TC0100000454.mm.1	2.73158	2.63879	2.74093	2.73312	2.70825	NONMMUT001098	NONMMUT001098	NA	2.75517	2.84114	2.76194	2.57124	2.72841	2.5663	2.71725	2.62634	2.64527	2.61862	2.81428	2.82904	2.7018	2.93939	2.70894	2.6561	2.70405	2.65714	2.8165	2.66718	2.54692	2.69822	2.81242
TC0100000455.mm.1	2.22972	2.10851	2.18742	2.23763	2.18355	NONMMUT001100	NONMMUT001100	NA	2.26811	2.37385	2.02714	2.11675	2.36275	1.97883	2.11025	2.35738	1.98756	2.12706	2.16635	2.12104	2.33525	2.53603	2.01484	2.1756	2.43783	2.02383	2.21925	2.22456	2.17933	2.065	2.22961
TC0100000456.mm.1	6.97769	6.96147	6.90729	6.7393	6.99607	Nop58	NM_018868	NOP58 ribonucleoprotein	6.70335	6.80949	7.19974	7.13222	7.04363	6.71425	7.00904	6.90455	7.21805	6.97676	6.84916	6.92056	6.88269	6.78588	6.69888	6.64452	6.78291	6.7843	6.92045	6.71335	7.29508	6.95823	7.09326
TC0100000457.mm.1	6.36958	6.09781	6.14108	6.35022	6.24371	Snord70	NR_028554	small nucleolar RNA, C/D box 70	6.28688	6.487	7.01575	6.3857	5.67256	6.43298	6.31151	6.28485	5.36191	6.28402	6.33809	6.12934	5.81288	6.16556	6.11121	6.32235	6.70757	6.44443	6.50233	5.82722	6.73597	6.04657	6.10644
TC0100000458.mm.1	5.26849	5.29134	5.13751	5.05844	5.08398	Gm26293	ENSMUST00000104170	predicted gene, 26293	5.08192	5.48618	5.7695	5.10044	4.90441	5.2602	5.2921	5.5579	5.05517	5.3448	5.24522	5.05481	4.90522	4.75355	4.97327	4.89493	5.38621	5.28423	5.18889	4.7042	5.39472	4.97355	5.15853
TC0100000459.mm.1	3.31082	3.40088	3.12547	3.09176	3.02677	Gm26287	ENSMUST00000158887	predicted gene, 26287	3.31893	3.4086	3.97725	2.95396	2.89538	3.28416	3.4101	3.43195	3.47731	3.39205	3.04355	3.01804	3.04822	2.70947	2.98862	3.03398	3.40574	3.32101	3.35135	2.79441	2.98243	3.03416	2.9715
TC0100000460.mm.1	6.88553	6.95809	6.68817	6.88131	6.89389	Snord11	NR_028521	small nucleolar RNA, C/D box 11	7.00559	6.72111	7.45464	6.67305	6.57327	6.93548	6.98314	7.00678	6.90695	6.79101	6.60768	6.65148	6.70249	6.61824	6.85915	6.71888	7.17646	7.03381	7.02358	6.85281	7.08114	6.8265	6.68543
TC0100000461.mm.1	1.71488	1.74535	1.73828	1.76317	1.82221	KnowTID_00000070	KnowTID_00000070	NA	1.79457	1.71397	1.92543	1.61773	1.52272	1.70039	2.01917	1.66075	1.60108	1.70926	1.9582	1.60477	1.68091	1.57534	1.90539	1.92056	1.62806	1.78651	1.71331	1.91947	2.05485	1.71224	1.71117
TC0100000462.mm.1	9.02027	9.04216	9.0717	9.03968	8.90065	Bmpr2	NM_007561	bone morphogenetic protein receptor, type II (serine/threonine kinase)	9.02709	8.90306	8.92108	9.1878	9.06233	9.06529	9.00772	9.01615	9.0795	9.10678	9.05309	9.09978	9.02717	9.15459	9.08109	8.98438	8.97195	9.00639	8.99908	8.8789	8.80089	8.925	8.89937
TC0100000463.mm.1	3.03041	3.12288	3.08934	3.02832	2.95825	NONMMUT001111	NONMMUT001111	NA	2.71883	3.07036	2.95822	3.30059	3.10408	2.86993	3.3329	3.09725	3.19143	3.2335	3.1837	3.06067	2.8795	2.98237	3.26248	3.1795	3.03835	2.67889	3.2655	2.83572	2.22318	3.04607	3.42076
TC0100000464.mm.1	6.38484	6.18669	6.23578	6.30911	6.22305	Fam117b	NM_001037725	family with sequence similarity 117, member B	6.26097	6.43762	6.44061	6.34066	6.44436	6.24494	6.17881	6.10066	6.22236	6.28301	6.17281	6.25288	6.23442	6.27383	6.30946	6.36123	6.30757	6.29348	6.17016	6.13933	6.37691	6.18535	6.24353
TC0100000465.mm.1	4.59924	4.69052	4.59474	4.56531	4.54761	Carf	NM_001285463	calcium response factor	4.70044	4.43503	4.40863	4.82516	4.62693	4.60305	4.6926	4.628	4.83845	4.61123	4.62731	4.62938	4.51104	4.56776	4.58742	4.6384	4.65692	4.37604	4.67823	4.50104	4.49328	4.50105	4.56443
TC0100000466.mm.1	10.9943	10.9603	10.9406	10.9676	10.9685	Gm15464	ENSMUST00000118718	predicted gene 15464	11.0433	11.0143	11.1395	10.9823	10.7919	11.059	10.9739	10.952	10.8561	10.9507	11.031	10.9347	10.846	11.0037	10.9767	10.9008	11.0038	10.9531	10.9791	10.9935	11.0066	10.9387	10.9249
TC0100000467.mm.1	7.94758	8.13233	8.08877	8.01684	7.92053	Nbeal1	NM_173444	neurobeachin like 1	8.00328	7.81497	7.677	8.19277	8.04988	8.064	8.11329	8.07291	8.2791	8.14355	8.13466	8.06708	8.00978	8.18416	8.08859	7.93287	7.97332	7.90527	8.14445	7.95113	7.59451	7.96526	7.94731
TC0100000468.mm.1	3.6162	3.61085	3.64637	3.54866	3.45166	NONMMUT001131	NONMMUT001131	NA	3.43743	3.62468	3.27012	4.09069	3.65808	3.34326	3.86651	3.2675	3.96613	3.78839	3.66822	3.8556	3.27329	3.77358	3.70991	3.42313	3.5197	3.31697	3.60164	3.16515	3.0601	3.53894	3.89246
TC0100000469.mm.1	7.29791	7.37241	7.27644	7.2065	7.31559	Cyp20a1	NM_030013	cytochrome P450, family 20, subfamily a, polypeptide 1	7.38312	7.20739	7.36321	7.28805	7.24777	7.35736	7.31073	7.32622	7.49532	7.32644	7.24073	7.29171	7.24686	7.23079	7.32266	7.06797	7.25053	7.16056	7.35777	7.16974	7.71681	7.14402	7.18963
TC0100000470.mm.1	2.50183	2.58631	2.489	2.39299	2.36808	NONMMUT001134	NONMMUT001134	NA	2.68605	2.37815	2.17202	2.84079	2.43215	2.71417	2.48488	2.23619	2.90999	2.56536	2.62858	2.39264	2.3694	2.69594	2.24319	2.24355	2.40829	2.37397	2.35763	2.32919	2.36477	2.30016	2.48865
TC0100000471.mm.1	7.06973	7.22796	7.27548	7.1614	7.12686	Abi2	NM_001198570	abl-interactor 2	7.31959	7.01105	6.89818	7.1023	7.01751	7.28498	7.08314	7.18404	7.35969	7.35083	7.2935	7.23211	7.22546	7.16302	7.22651	7.22702	7.168	7.02247	7.20411	7.13389	7.06117	7.17406	7.06108
TC0100000472.mm.1	1.75739	1.7134	1.64676	1.715	1.65892	NONMMUT001135	NONMMUT001135	NA	1.69617	1.92946	1.76867	1.72651	1.66615	1.63045	1.75008	1.50964	1.96342	1.82034	1.50393	1.71179	1.55098	1.72497	1.6783	1.64845	1.93664	1.58664	1.50626	1.61864	1.77403	1.64468	1.75097
TC0100000473.mm.1	2.84666	2.94586	2.88817	2.99118	2.89535	Gm11576	ENSMUST00000117433	predicted gene 11576	2.94843	2.87972	2.81863	2.90973	2.67682	2.80911	2.98637	3.06389	2.92405	2.79166	2.80942	2.96835	2.98326	3.00888	2.90994	2.81614	2.99864	3.22231	2.68398	3.21746	2.80993	2.86367	2.9017
TC0100000474.mm.1	1.42418	1.43744	1.43124	1.42646	1.46364	Gm11577	ENSMUST00000118030	predicted gene 11577	1.39585	1.39666	1.34542	1.40021	1.58275	1.48716	1.49346	1.37231	1.39682	1.38932	1.37343	1.53372	1.42849	1.40698	1.49335	1.40354	1.34724	1.4812	1.38473	1.53354	1.42338	1.57476	1.40178
TC0100000475.mm.1	9.20811	9.12285	9.08735	8.99861	9.06275	Eif4a-ps4	ENSMUST00000122226	eukaryotic translation initiation factor 4A, pseudogene 4	9.02154	9.34933	9.43753	9.06004	9.17209	9.13895	9.13973	9.10251	9.1102	9.12436	9.10457	9.03449	9.08599	8.88516	8.97858	8.86037	9.06729	9.20165	9.07005	9.02467	9.10493	9.09139	9.02268
TC0100000476.mm.1	3.96074	3.82838	3.75202	3.76073	3.88246	Cd28	NM_007642	CD28 antigen	3.71286	4.01095	4.4887	3.68499	3.9062	4.18783	3.71378	3.62852	3.78337	3.61985	3.86806	3.74242	3.77776	3.76781	3.37668	3.39381	4.06449	4.20087	3.76256	4.09176	3.88139	4.09451	3.58206
TC0100000477.mm.1	1.74501	1.82694	1.70844	1.76884	1.76412	NONMMUT001158	NONMMUT001158	NA	1.8984	1.62825	1.84165	1.50963	1.84709	1.61719	1.47177	2.04598	2.17281	1.73611	1.67515	1.64253	1.77996	1.71248	1.6661	1.84544	1.77843	1.84175	1.80289	1.99158	1.59106	1.75004	1.68502
TC0100000478.mm.1	2.06364	1.97298	1.90148	1.94556	1.91722	NONMMUT001160	NONMMUT001160	NA	1.87713	1.95734	2.18646	2.04118	2.25608	2.04835	1.96013	1.9198	1.96367	1.77133	1.99064	1.98369	1.86027	2.03227	1.87152	1.96212	1.96397	1.89794	1.78756	2.02292	1.97243	2.04851	1.75469
TC0100000479.mm.1	4.00552	4.03093	4.14552	4.02211	4.06977	2310016D23Rik	ENSMUST00000130082	RIKEN cDNA 2310016D23 gene	4.09986	3.98436	4.03215	3.94826	3.96299	4.16561	4.14114	4.05326	3.76369	4.01129	4.18616	4.12406	4.26058	4.18069	3.98812	3.90143	3.97174	4.06858	3.92516	4.10611	4.15	3.99435	4.17322
TC0100000480.mm.1	1.32367	1.29688	1.2446	1.28279	1.22229	NONMMUT001162	NONMMUT001162	NA	1.42681	1.18005	1.36377	1.37452	1.27319	1.22695	1.2153	1.49385	1.25142	1.12857	1.30504	1.11449	1.43032	1.25378	1.23361	1.27331	1.29063	1.36262	1.2718	1.11562	1.29707	1.14952	1.27743
TC0100000481.mm.1	1.94869	2.04258	2.05043	2.11474	2.0622	Gm11609	ENSMUST00000121926	predicted gene 11609	2.0404	1.99222	1.89206	1.92152	1.89723	2.01895	1.91242	2.11608	2.12287	1.9061	2.07912	2.1435	2.07301	1.80996	2.1615	2.16307	2.14365	2.29553	2.01446	2.22677	2.04038	2.00498	2.02439
TC0100000482.mm.1	6.40249	6.45613	6.43204	6.22077	6.47461	Gm11581	ENSMUST00000122024	predicted gene 11581	6.43236	6.49935	6.64996	6.21632	6.21445	6.6316	6.57358	6.28719	6.33216	6.42231	6.6839	6.52165	6.10029	6.29019	6.10877	6.26689	6.09032	6.34767	6.59671	6.13559	6.70383	6.40789	6.52903
TC0100000483.mm.1	2.47562	2.49212	2.56784	2.50393	2.52856	NONMMUT001165	NONMMUT001165	NA	2.56396	2.44121	2.39301	2.53472	2.44521	2.46107	2.50403	2.66785	2.33554	2.53027	2.65094	2.52672	2.56343	2.55759	2.36719	2.55753	2.4828	2.55457	2.38169	2.65182	2.67616	2.50888	2.42425
TC0100000484.mm.1	1.41257	1.44068	1.42201	1.32286	1.38965	KnowTID_00000073	KnowTID_00000073	NA	1.4067	1.33101	1.34458	1.46379	1.5168	1.41188	1.48044	1.49483	1.3756	1.52847	1.33031	1.5228	1.30645	1.22489	1.44245	1.41981	1.29594	1.23121	1.42691	1.26877	1.56284	1.3932	1.29654
TC0100000485.mm.1	2.14119	1.87841	1.95212	2.00283	2.01578	Ctla4	NM_001281976	cytotoxic T-lymphocyte-associated protein 4	2.05828	2.15896	2.31451	2.10972	2.06446	1.97916	1.85226	1.81615	1.86605	1.84701	1.89037	1.99974	2.07135	2.0479	1.93836	1.92777	2.0132	2.08691	1.9704	1.99453	2.09008	2.02792	1.99598
TC0100000486.mm.1	11.2081	11.1547	11.1176	11.1741	11.155	Rpl18-ps1	ENSMUST00000121555	ribosomal protein L18, pseudogene 1	11.1473	11.1729	11.322	11.1678	11.2308	11.1948	11.1415	11.1572	11.1255	11.0825	11.1334	11.1379	11.1164	11.1923	11.1869	11.1227	11.2059	11.1628	11.1615	11.2079	11.1926	11.1107	11.1023
TC0100000487.mm.1	1.95196	1.91206	1.99399	1.95221	1.961	NONMMUT001169	NONMMUT001169	NA	1.97161	1.85729	2.10691	1.86894	1.95506	1.79645	2.01701	1.943	1.89178	1.93144	2.02123	1.94368	2.07961	1.93173	1.87478	2.05578	1.94131	1.95746	2.1209	1.93427	1.98438	1.75202	2.01344
TC0100000488.mm.1	1.6908	1.65028	1.7572	1.74391	1.74958	NONMMUT001170	NONMMUT001170	NA	1.73815	1.58229	1.64428	1.80223	1.68706	1.59288	1.64466	1.72165	1.64195	1.77581	1.64416	1.83251	1.77632	1.73568	1.74707	1.78574	1.68681	1.76426	1.7633	1.77856	1.67896	1.80975	1.71734
TC0100000489.mm.1	1.78004	1.78685	1.86818	1.77258	1.77029	NONMMUT001175	NONMMUT001175	NA	1.85588	1.84062	1.70459	1.71154	1.78758	1.69293	1.67466	1.75465	2.02515	1.86991	1.80185	1.8869	1.91404	1.85947	1.75753	1.70696	1.82022	1.71874	1.73286	1.92136	1.7837	1.77619	1.63735
TC0100000490.mm.1	3.53203	3.20813	3.14165	3.30385	3.19987	Icos	NM_017480	inducible T cell co-stimulator	3.21755	3.81236	4.08753	3.18065	3.36208	3.17337	3.24894	3.20785	3.20234	3.07023	3.15774	3.21005	3.12859	3.08719	3.22637	3.07655	3.52918	3.59996	3.21615	2.88735	3.46859	3.24627	3.18101
TC0100000491.mm.1	8.42582	8.30718	8.2157	8.37477	8.35755	Rpl17-ps1	ENSMUST00000119156	ribosomal protein L17, pseudogene 1	8.37313	8.36586	8.69258	8.34045	8.35706	8.40442	8.30488	8.29845	8.22098	8.20088	8.29111	8.20322	8.1676	8.46032	8.33799	8.26791	8.41356	8.39406	8.35955	8.33254	8.50865	8.29812	8.2889
TC0100000492.mm.1	1.93587	1.99645	1.9593	2.01685	1.95574	Gm11587	ENSMUST00000128274	predicted gene 11587	1.90307	1.97214	2.07794	1.854	1.87221	2.00559	2.01685	2.00362	1.95973	1.8145	2.1427	1.79883	2.08115	2.1186	1.92703	2.02005	2.05737	1.96119	1.81303	1.96559	1.90241	2.01429	2.08341
TC0100000493.mm.1	3.89943	3.82367	3.87666	3.90765	3.9165	9530026F06Rik	NR_040483	RIKEN cDNA 9530026F06 gene	3.99779	3.90552	3.897	3.92826	3.76856	3.84031	3.79773	3.85042	3.80622	3.78592	3.9189	3.88822	3.9136	4.00435	3.85509	3.94299	3.86976	3.86605	3.93181	4.00173	3.80895	3.86972	3.97026
TC0100000494.mm.1	1.42826	1.39975	1.44668	1.46578	1.47777	Gm11588	ENSMUST00000141758	predicted gene 11588	1.46893	1.44485	1.45926	1.42423	1.34402	1.37217	1.45119	1.28919	1.48645	1.41185	1.2945	1.59275	1.48764	1.46925	1.44853	1.42117	1.48081	1.50913	1.43908	1.44554	1.5193	1.51658	1.46835
TC0100000495.mm.1	1.79734	1.72776	1.74201	1.72828	1.73706	Gm25839	ENSMUST00000158921	predicted gene, 25839	1.83069	1.70051	1.90031	1.7604	1.79479	1.66751	1.7966	1.65899	1.78793	1.66808	1.70608	1.82646	1.76741	1.78115	1.70502	1.68029	1.70903	1.7659	1.75284	1.63824	1.78289	1.71424	1.79709
TC0100000496.mm.1	1.65275	1.68726	1.70323	1.6665	1.57496	NONMMUT001184	NONMMUT001184	NA	1.64436	1.4913	1.57309	1.73664	1.81835	1.56411	1.83601	1.81775	1.53119	1.70973	1.66076	1.75027	1.69217	1.55422	1.7459	1.73035	1.62833	1.67372	1.63027	1.66873	1.51049	1.52537	1.53993
TC0100000497.mm.1	6.02345	6.23989	6.26846	6.1752	6.16928	Pard3b	NM_001081050	par-3 family cell polarity regulator beta	6.21185	5.95009	5.7211	6.20816	6.02602	6.19976	6.20991	6.21836	6.33153	6.37309	6.25166	6.28107	6.168	6.28974	6.30698	6.10664	6.19109	5.98156	6.26035	6.12028	6.10914	6.14033	6.21629
TC0100000498.mm.1	2.31552	2.26632	2.35776	2.27543	2.10588	NONMMUT001187	NONMMUT001187	NA	2.11057	2.39006	2.05046	2.45587	2.57062	2.06443	2.34711	2.36349	2.29024	2.34409	2.3619	2.50666	2.21837	2.35408	2.53881	2.20429	2.14075	2.13922	2.20449	1.86798	2.05771	2.04692	2.35228
TC0100000499.mm.1	2.56551	2.94623	2.52202	2.52922	2.69628	NONMMUT001188	NONMMUT001188	NA	2.54716	2.55416	2.3459	2.75764	2.62269	2.941	2.70658	2.99457	3.14276	2.47927	2.52764	2.54901	2.53218	2.66718	2.69768	2.4912	2.51562	2.2744	2.69468	2.82886	2.57152	2.54023	2.84611
TC0100000500.mm.1	2.65013	3.07281	2.89337	2.83177	2.85519	NONMMUT001189	NONMMUT001189	NA	2.75492	2.57601	2.2025	2.97948	2.73771	3.18078	3.06113	2.92947	3.11985	2.82351	2.89535	2.93658	2.91805	3.1558	2.89068	2.8502	2.69524	2.56694	3.07209	2.72828	2.61302	2.84164	3.02092
TC0100000501.mm.1	3.90503	4.46728	4.23443	4.06154	4.04606	NONMMUT001193	NONMMUT001193	NA	4.00226	3.88131	3.16669	4.22624	4.24865	4.26242	4.54356	4.221	4.84214	4.37753	4.01979	4.58559	3.95479	4.32042	4.35238	4.01954	3.81544	3.7999	4.2341	4.23811	3.31727	3.80866	4.63219
TC0100000502.mm.1	4.00699	4.66635	4.37674	4.21942	4.17104	NONMMUT001194	NONMMUT001194	NA	4.27547	4.10132	3.19079	4.33205	4.13535	4.23988	4.9092	4.59131	4.92502	4.55625	4.26277	4.60008	4.08786	4.54982	4.46614	3.78404	4.1371	4.16	4.41104	4.31544	3.67819	4.13448	4.31607
TC0100000503.mm.1	2.911	3.20484	3.14642	2.9495	2.87911	NONMMUT001195	NONMMUT001195	NA	2.9472	2.86459	2.6557	3.31037	2.77712	3.13016	3.17257	3.01225	3.50438	3.40994	3.12559	3.02904	3.02112	3.13382	3.16093	2.95741	2.83285	2.66249	2.68766	3.05055	2.43749	2.77301	3.44683
TC0100000504.mm.1	2.35942	2.59029	2.54661	2.42967	2.45599	NONMMUT001196	NONMMUT001196	NA	2.47114	2.27562	2.00465	2.57755	2.46811	2.23449	2.52159	2.69864	2.90644	2.52714	2.60186	2.458	2.59942	2.57732	2.52284	2.38816	2.54626	2.11375	2.44484	2.46036	2.19901	2.55332	2.62242
TC0100000505.mm.1	1.98105	2.09484	2.07167	2.07859	2.02033	NONMMUT001199	NONMMUT001199	NA	1.86365	1.99465	1.88887	2.11928	2.03882	2.06036	2.13418	2.06529	2.11954	2.01246	2.17001	2.16076	1.94343	2.28311	2.22817	2.02427	2.10121	1.75617	2.14665	1.82236	2.05617	1.85043	2.22604
TC0100000506.mm.1	2.46256	2.7067	2.58721	2.7577	2.50927	NONMMUT001200	NONMMUT001200	NA	2.38017	2.50324	2.2615	2.57092	2.59699	2.74187	2.35962	2.65304	3.07228	2.70973	2.7438	2.58408	2.31124	2.89252	3.15488	2.7496	2.44608	2.54543	2.63132	2.44088	2.21974	2.40689	2.84753
TC0100000507.mm.1	2.22191	2.33248	2.22035	2.23156	2.24531	NONMMUT001202	NONMMUT001202	NA	2.27012	2.37232	2.09381	2.27674	2.09657	2.2243	2.24599	2.1528	2.70681	2.4366	2.12136	2.16735	2.15607	2.41385	2.34324	2.08524	2.11851	2.19695	2.25546	2.44645	1.8358	2.39937	2.28949
TC0100000508.mm.1	7.25257	7.23676	7.10672	7.235	7.24833	Gm11599	ENSMUST00000118720	predicted gene 11599	7.28458	7.33545	7.36526	7.15323	7.12431	7.38391	7.33577	7.30458	6.92276	7.17853	7.17321	7.07735	6.99779	7.28436	7.19971	7.15077	7.25259	7.28756	7.34531	7.23872	7.27011	7.17712	7.21041
TC0100000509.mm.1	6.39456	5.87522	5.81734	5.80875	6.23876	Nrp2	NM_001077403	neuropilin 2	5.78227	6.87612	6.77521	6.02291	6.51632	5.90458	5.94109	5.73801	5.9172	5.64798	5.79034	5.83119	5.99985	5.73806	5.73947	5.45953	5.90873	6.19798	6.0412	6.0885	6.27207	6.41119	6.38084
TC0100000510.mm.1	3.80513	3.51746	3.42711	3.22371	3.43522	NONMMUT001206	NONMMUT001206	NA	3.28122	4.20155	3.96003	3.41828	4.16457	3.38137	3.67718	3.5522	3.45908	3.21098	3.53273	3.66458	3.30014	3.02179	3.3069	2.97587	3.13308	3.6809	3.39307	3.37878	3.46152	3.37307	3.56965
TC0100000511.mm.1	4.21842	3.71597	3.48959	3.35447	4.00992	NONMMUT001209	NONMMUT001209	NA	3.45519	4.81589	4.74933	3.92875	4.14295	3.63263	3.65118	3.58592	3.99417	3.48132	3.46974	3.5309	3.4764	3.1823	2.77949	3.07691	3.53548	4.19816	3.60886	3.82679	3.97219	4.29694	4.34482
TC0100000512.mm.1	2.53243	2.4761	2.49207	2.46104	2.39322	NONMMUT001210	NONMMUT001210	NA	2.4456	2.46521	2.47382	2.70456	2.57297	2.40736	2.55273	2.50466	2.43965	2.33134	2.64518	2.46535	2.52641	2.5979	2.49501	2.20812	2.44621	2.55796	2.02369	2.45906	2.40932	2.60405	2.46995
TC0100000513.mm.1	2.17253	2.2245	2.23063	2.24148	2.28392	NONMMUT001215	NONMMUT001215	NA	2.06369	2.51445	2.30718	2.00208	1.97523	2.14937	2.31852	2.21862	2.21151	2.23779	2.18141	2.0534	2.44992	2.31872	2.24344	2.20945	2.1877	2.24811	2.17783	2.29808	2.30154	2.25812	2.38402
TC0100000514.mm.1	3.47406	3.34993	3.52962	3.32698	3.46869	Gm24942	ENSMUST00000158328	predicted gene, 24942	3.40478	3.63368	3.42567	3.6509	3.25527	3.34382	3.30249	3.36332	3.39006	3.40928	3.56197	3.35313	3.79408	3.43925	3.14633	3.26725	3.34789	3.43417	3.38257	3.80087	3.30971	3.38585	3.46445
TC0100000515.mm.1	2.2169	2.32473	2.23446	2.2639	2.28899	Gm11601	ENSMUST00000122045	predicted gene 11601	2.26588	2.1596	2.30725	2.18814	2.16363	2.36855	2.3638	2.1987	2.36788	2.15015	2.30649	2.29917	2.18202	2.28735	2.28339	2.07407	2.38041	2.29426	2.24231	2.26384	2.49531	2.19348	2.25002
TC0100000516.mm.1	6.10866	5.85019	5.83381	6.05391	5.95817	Gm11603	ENSMUST00000118179	predicted gene 11603	5.93951	6.11525	6.40701	5.98949	6.09202	6.0817	5.77323	5.82883	5.71701	5.87528	5.96482	5.91181	5.58333	6.15375	5.87331	6.0111	6.24167	5.98971	5.98736	5.89803	6.19413	5.91664	5.79467
TC0100000517.mm.1	5.04733	4.96708	5.06387	5.09229	4.98097	Ino80dos	NR_045914	INO80 complex subunit D, opposite strand	5.05266	5.01091	4.90389	5.17949	5.08969	4.94166	5.00744	4.9016	5.01761	5.02303	5.09327	5.07006	5.06913	5.2905	5.04662	5.10277	5.08016	4.94142	5.01824	4.90335	4.94714	5.01288	5.02324
TC0100000518.mm.1	4.49417	4.38691	4.27994	4.3731	4.20185	NONMMUT001228	NONMMUT001228	NA	4.42903	4.51742	4.35014	4.59327	4.581	4.27274	4.40892	4.32829	4.53768	4.19477	4.31468	4.31015	4.30017	4.50273	4.33837	4.19603	4.51088	4.31749	4.23008	4.1762	4.13488	4.10346	4.36462
TC0100000519.mm.1	8.21828	8.133	8.06544	8.16451	8.16098	Eef1b2	NM_018796	eukaryotic translation elongation factor 1 beta 2	8.0806	8.28452	8.43653	8.12334	8.16641	8.17729	8.11694	8.19991	8.03786	8.09785	8.10837	8.08761	7.96793	8.10523	8.18855	8.09472	8.25249	8.18155	8.19653	8.11526	8.34204	8.10772	8.04337
TC0100000520.mm.1	5.42919	5.45573	5.45656	5.27255	5.31446	Gm26457	ENSMUST00000082678	predicted gene, 26457	5.2794	5.80652	5.4465	5.29309	5.32043	5.2752	5.55887	5.49445	5.4944	5.29792	5.47308	5.26817	5.78708	5.3173	5.14565	5.04458	5.22258	5.63263	5.26489	5.38804	5.22813	5.33237	5.35889
TC0100000521.mm.1	4.69384	4.77449	4.83095	4.50545	4.9733	Snora41	NR_028558	small nucleolar RNA, H/ACA box 41	4.56632	4.65342	5.01732	4.73279	4.49936	4.74368	4.83059	4.78146	4.74223	4.76826	4.89057	4.73355	4.93141	4.42734	4.47491	4.31703	4.56138	4.74657	4.63162	4.60504	5.28972	4.9935	5.34659
TC0100000522.mm.1	11.2567	11.1623	11.1238	11.2621	11.1638	Gm23611	ENSMUST00000175328	predicted gene, 23611	11.1941	11.293	11.2434	11.2733	11.2797	11.1338	11.191	11.154	11.1706	11.1367	11.2152	11.1089	11.0343	11.3078	11.2679	11.2966	11.2251	11.2133	11.1723	11.1453	11.2426	11.1082	11.1505
TC0100000523.mm.1	2.10591	2.03188	2.09566	2.07032	2.05388	Zdbf2	NM_001267872	zinc finger, DBF-type containing 2	2.07854	1.98749	2.24294	2.14036	2.08023	2.01278	2.03883	2.1043	1.9716	2.13843	2.09977	2.02739	2.11703	2.1189	2.04032	2.11892	2.05301	2.02045	2.02622	2.02501	2.11506	2.06815	2.03494
TC0100000524.mm.1	3.82311	3.75515	3.73301	4.04381	4.11429	Adam23	NM_001177600	a disintegrin and metallopeptidase domain 23	3.82742	3.84595	3.9699	3.7568	3.71546	3.75073	3.72375	3.75705	3.78905	3.69077	3.77397	3.69588	3.77144	3.90837	3.69619	5.02146	3.79083	3.80222	3.86739	3.81531	4.50333	4.27667	4.10872
TC0100000525.mm.1	1.83264	1.78403	1.71745	1.70129	1.77054	Gm12748	ENSMUST00000120763	predicted gene 12748	1.88738	1.74032	1.96223	1.75124	1.82202	1.70762	1.87305	1.87633	1.67913	1.87015	1.63146	1.67127	1.69691	1.67146	1.75763	1.54279	1.71511	1.81945	1.68565	1.86085	1.83945	1.72739	1.73937
TC0100000526.mm.1	4.06362	4.13385	4.0474	3.95271	4.05763	Fastkd2	NM_172422	FAST kinase domains 2	4.05149	4.00065	4.0837	4.08647	4.0958	4.0653	4.13679	4.11487	4.21845	4.26145	3.9937	4.09447	3.83998	3.81595	3.95324	3.94646	4.07097	3.97691	4.17672	3.90711	4.03993	4.07154	4.09288
TC0100000527.mm.1	2.34044	2.31863	2.37671	2.35029	2.33679	Gm13754	ENSMUST00000120486	predicted gene 13754	2.31207	2.25001	2.42843	2.35376	2.35792	2.3074	2.30615	2.33399	2.327	2.28718	2.38227	2.3977	2.4397	2.33147	2.35523	2.35166	2.35914	2.35395	2.30552	2.42991	2.33028	2.32913	2.28912
TC0100000528.mm.1	2.45728	2.3868	2.44112	2.3243	2.46191	Gm13749	NR_027824	predicted gene 13749	2.64758	2.46618	2.58243	2.34009	2.25014	2.4532	2.20427	2.25014	2.63959	2.48731	2.64677	2.22144	2.40897	2.26693	2.43051	2.12396	2.69451	2.10561	2.42076	2.32107	2.64618	2.49964	2.42189
TC0100000529.mm.1	3.20514	3.11861	3.27062	3.15496	3.25321	NONMMUT001259	NONMMUT001259	NA	3.30847	3.03752	3.24777	3.1428	3.28914	3.10059	3.13262	3.09725	3.144	3.25315	3.26125	3.18208	3.38601	3.27394	3.09156	3.18115	3.06385	3.16427	3.29084	3.20686	3.29838	3.17278	3.2972
TC0100000530.mm.1	4.16949	4.01904	4.09971	4.10461	3.91211	Gm26649	ENSMUST00000181595	predicted gene, 26649	3.96708	4.18525	4.18587	4.174	4.33525	4.01079	3.86524	4.02497	4.17515	4.11684	4.05465	4.30483	3.92253	4.37185	4.16771	4.18707	3.81306	3.98337	3.97435	3.99173	3.76502	4.03069	3.79876
TC0100000531.mm.1	2.02921	1.97496	1.92373	1.91882	2.05483	Gm13748	ENSMUST00000149820	predicted gene 13748	1.94343	2.25671	1.8891	1.92878	2.12802	2.0308	1.85056	1.96397	2.05451	1.8565	1.91326	1.94773	1.97744	2.13083	1.86434	1.9158	1.81318	1.86994	1.9455	2.25458	2.00727	2.14047	1.92632
TC0100000532.mm.1	9.56914	9.59432	9.54592	9.60725	9.56925	Gm13750	ENSMUST00000117621	predicted gene 13750	9.7043	9.52984	9.61829	9.51345	9.4798	9.7182	9.53487	9.61259	9.51163	9.6362	9.60483	9.58841	9.35425	9.47647	9.65632	9.74379	9.64871	9.51094	9.65348	9.54034	9.60775	9.57441	9.47028
TC0100000533.mm.1	5.93417	5.87729	5.86169	5.89902	5.83606	Gm25748	ENSMUST00000175487	predicted gene, 25748	5.86588	5.93895	6.04322	5.98824	5.83457	5.8328	6.04172	5.87864	5.75602	5.63132	5.99772	5.84282	5.97491	5.87372	5.88101	5.90692	5.94852	5.88496	5.76087	5.77934	5.95063	5.69829	5.99115
TC0100000534.mm.1	1.83799	1.8173	1.9354	1.89654	1.88056	NONMMUT001271	NONMMUT001271	NA	1.82783	1.77613	1.89546	1.90925	1.78127	1.95937	1.79685	1.8456	1.66736	1.71755	1.98222	1.88496	2.15689	1.97399	1.78188	1.92119	1.93203	1.8736	1.78981	1.93647	1.95435	1.80386	1.91833
TC0100000535.mm.1	7.69992	7.83813	7.74605	7.64006	7.7049	Creb1	NM_001037726	cAMP responsive element binding protein 1	7.75275	7.57323	7.61027	7.76336	7.79999	7.72036	7.84193	7.80377	7.98646	7.84327	7.68259	7.78597	7.67239	7.62861	7.67913	7.45077	7.55513	7.88668	7.72725	7.63156	7.68454	7.7217	7.75946
TC0100000536.mm.1	4.35863	4.36925	4.31127	4.11698	4.17789	NONMMUT001273	NONMMUT001273	NA	3.77985	4.67924	4.11013	4.45191	4.77203	4.03449	4.31861	4.47936	4.64454	4.42728	4.28023	4.12463	4.41295	4.27813	3.96897	4.00979	4.13304	4.19499	4.17054	4.11811	3.91708	3.92897	4.75474
TC0100000537.mm.1	2.88245	2.76097	2.6414	2.69924	2.70288	NONMMUT001274	NONMMUT001274	NA	2.61699	2.97517	2.86409	2.98921	2.96678	2.7383	2.66602	2.73945	2.90011	2.73173	2.76459	2.61667	2.4526	2.62568	2.75446	2.54528	2.79041	2.78037	2.4666	2.63379	2.61485	2.61244	3.18672
TC0100000538.mm.1	2.94722	2.76374	2.62841	2.56525	2.85941	NONMMUT001275	NONMMUT001275	NA	2.64665	2.86234	2.84059	3.51644	2.87008	2.53938	2.96084	2.60784	2.94689	2.84196	2.74165	2.49934	2.43067	2.83776	2.61737	2.21284	2.49559	2.66267	2.75081	2.62181	2.98613	2.82	3.11833
TC0100000539.mm.1	3.19322	3.2402	3.01465	2.89425	3.06041	NONMMUT001276	NONMMUT001276	NA	3.02129	3.10029	3.16742	3.51618	3.16092	2.71099	3.27701	3.22998	3.7428	3.0528	3.27848	3.05921	2.6681	2.92081	2.7736	2.44641	2.9118	3.41863	2.87683	3.02793	3.06375	3.02608	3.30747
TC0100000540.mm.1	2.46112	2.57256	2.60706	2.59442	2.59316	KnowTID_00000076	KnowTID_00000076	NA	2.51376	2.25543	2.58587	2.57037	2.38018	2.57596	2.42102	2.66341	2.62985	2.55468	2.82275	2.42577	2.62503	2.56518	2.52463	2.92922	2.53191	2.42116	2.59529	2.7017	2.76028	2.35057	2.55799
TC0100000541.mm.1	6.68602	6.45969	6.55335	6.4189	6.52494	Ccnyl1	NM_001097644	cyclin Y-like 1	6.44397	6.77063	6.89243	6.60338	6.71971	6.38653	6.43771	6.47097	6.54354	6.63293	6.48948	6.52853	6.56246	6.47921	6.37975	6.22904	6.42822	6.57831	6.51493	6.35929	6.72124	6.50966	6.51958
TC0100000542.mm.1	3.03603	3.12631	3.03558	3.19902	3.20406	KnowTID_00000077	KnowTID_00000077	NA	3.03195	2.91949	2.91927	3.48901	2.82043	3.09291	3.19463	3.19384	3.02387	2.89299	3.18742	3.05705	3.00487	3.28264	3.15663	3.20076	3.11973	3.23534	3.20657	3.48055	3.18646	2.9661	3.1806
TC0100000543.mm.1	4.49091	4.47924	4.33241	4.4695	4.44552	Rpl31-ps24	ENSMUST00000181350	ribosomal protein L31, pseudogene 24	4.50136	4.46066	4.85692	4.41403	4.22159	4.77205	4.44461	4.41094	4.28937	4.36504	4.41653	4.36015	4.18791	4.56845	4.42413	4.4038	4.53029	4.42081	4.48815	4.29751	4.67023	4.42059	4.35112
TC0100000544.mm.1	3.34313	3.36171	3.3633	3.32694	3.41792	Gm8550	ENSMUST00000161621	predicted gene 8550	3.35006	3.32893	3.39429	3.31875	3.32362	3.34509	3.36214	3.42829	3.31132	3.29109	3.47153	3.35376	3.33683	3.36039	3.35777	3.19751	3.34823	3.3708	3.18995	3.36598	3.60129	3.40769	3.52471
TC0100000545.mm.1	6.26096	6.25409	6.21914	6.10747	6.13371	Pikfyve	NM_011086	phosphoinositide kinase, FYVE finger containing	6.09196	6.29448	6.34449	6.23429	6.33957	6.20933	6.24781	6.18525	6.37397	6.25606	6.2041	6.20483	6.21154	6.02581	6.08989	5.99473	6.16093	6.26597	6.16341	6.03327	6.05286	6.22268	6.19631
TC0100000546.mm.1	2.15181	2.12686	2.22455	2.20118	2.20324	Pth2r	NM_139270	parathyroid hormone 2 receptor	2.24171	2.13535	2.0798	2.12406	2.17814	2.1458	2.10867	2.08778	2.16518	2.06932	2.25726	2.17706	2.39457	2.21458	2.26491	2.15961	2.14737	2.21945	2.09767	2.31566	2.1957	2.21916	2.188
TC0100000547.mm.1	5.21242	5.04325	5.05265	5.12495	5.16465	Gm8805	ENSMUST00000117848	predicted gene 8805	5.13374	4.99712	5.36933	5.15313	5.40878	5.09532	5.07673	5.05281	4.94812	4.94612	5.15086	4.99521	5.11841	5.29864	5.03756	5.02808	5.20215	5.05834	5.01105	5.21228	5.46482	5.06202	5.07307
TC0100000548.mm.1	3.59857	3.60216	3.7549	3.69298	3.6944	Crygf	NM_027010	crystallin, gamma F	3.64007	3.5756	3.50206	3.59805	3.67709	3.68953	3.62197	3.72237	3.37476	3.61718	3.74579	3.72104	3.93562	3.79555	3.62249	3.62295	3.75997	3.66396	3.48661	3.87318	3.59104	3.59245	3.92869
TC0100000549.mm.1	2.49118	2.48719	2.52878	2.42384	2.46663	Gm15659	ENSMUST00000118881	predicted gene 15659	2.53219	2.15002	2.56048	2.65719	2.556	2.54432	2.44749	2.3833	2.57366	2.59565	2.47616	2.54972	2.49361	2.48577	2.39099	2.38031	2.54285	2.3193	2.46328	2.27159	2.8001	2.36894	2.42924
TC0100000550.mm.1	4.49533	4.15368	4.1421	4.60041	4.46857	Gm8812	ENSMUST00000118496	predicted gene 8812	3.97064	4.57975	4.7003	4.61671	4.60927	4.28577	4.16232	3.96602	4.20062	3.84721	4.47964	3.9746	4.26696	4.19714	4.66852	4.62132	4.8988	4.61629	4.41348	4.19414	4.99684	4.39521	4.34316
TC0100000551.mm.1	3.32921	3.26419	3.23784	3.78553	3.6449	Map2	NM_001039934	microtubule-associated protein 2	3.31616	3.02806	3.62133	3.27077	3.40974	3.30774	3.22837	3.18276	3.33789	3.18985	3.24563	3.25738	3.25852	3.42646	3.34567	5.60137	3.3062	3.24792	3.29843	3.2506	4.28543	4.05592	3.33414
TC0100000552.mm.1	1.73822	1.66093	1.63058	1.88395	1.70045	NONMMUT001305	NONMMUT001305	NA	1.64224	1.84847	1.64277	1.85673	1.70088	1.55787	1.83762	1.61872	1.6295	1.68386	1.57816	1.56167	1.69863	1.70856	1.68589	2.27999	1.94068	1.80464	1.42944	1.76295	1.97003	1.50967	1.83016
TC0100000553.mm.1	1.44969	1.48659	1.56387	1.55204	1.49523	NONMMUT001306	NONMMUT001306	NA	1.36463	1.45998	1.30424	1.29093	1.8287	1.42322	1.40722	1.44742	1.6685	1.5271	1.49391	1.75217	1.48232	1.38367	1.75079	1.67957	1.5913	1.35489	1.52208	1.35627	1.67054	1.52028	1.40701
TC0100000554.mm.1	1.84453	1.84637	1.89366	1.8502	1.87964	Gm24729	ENSMUST00000158225	predicted gene, 24729	1.69863	1.68047	2.03632	1.92032	1.88693	1.95979	1.85897	1.7562	1.8105	1.81988	1.95811	2.10446	1.69218	1.88789	1.82035	1.96052	1.77594	1.80627	1.75432	1.91168	1.95337	1.93674	1.84208
TC0100000555.mm.1	1.39563	1.54619	1.57207	1.64656	1.64839	NONMMUT001312	NONMMUT001312	NA	1.58602	1.3773	1.35284	1.42808	1.23391	1.57622	1.67432	1.40353	1.53069	1.5242	1.59803	1.57174	1.59432	1.55721	1.41882	2.33968	1.42532	1.4918	1.53654	1.37824	2.05513	1.83163	1.44042
TC0100000556.mm.1	1.30911	1.31624	1.30947	1.33269	1.28547	NONMMUT001315	NONMMUT001315	NA	1.26746	1.28932	1.28216	1.37997	1.32665	1.33832	1.35748	1.29376	1.2754	1.33586	1.3065	1.26212	1.33341	1.2119	1.29011	1.61386	1.26254	1.28505	1.36309	1.2665	1.36011	1.31603	1.12164
TC0100000557.mm.1	1.37785	1.26872	1.20048	1.17414	1.31834	Gm25411	ENSMUST00000083760	predicted gene, 25411	1.3461	1.34847	1.43713	1.44148	1.31607	1.44565	1.17132	1.33911	1.1188	1.1743	1.16612	1.32623	1.13528	1.39271	1.1409	1.02784	1.1856	1.12363	1.18865	1.3203	1.51152	1.28856	1.28269
TC0100000558.mm.1	3.11205	3.06862	3.14845	3.36772	3.25885	Unc80	NM_175510	unc-80 homolog (C. elegans)	3.13382	3.01282	3.21443	3.02971	3.16947	3.11222	3.08981	3.09678	2.97567	3.05901	3.14014	3.10638	3.28826	3.19901	3.10575	4.28117	3.12385	3.1288	3.0436	3.22414	3.4573	3.45017	3.11902
TC0100000559.mm.1	1.29273	1.27464	1.27152	1.31989	1.26735	NONMMUT001317	NONMMUT001317	NA	1.21007	1.22095	1.20742	1.28274	1.54245	1.29295	1.16233	1.31016	1.33311	1.30535	1.20593	1.24792	1.32688	1.58568	1.10783	1.34988	1.24339	1.31266	1.33229	1.21817	1.38551	1.22137	1.17941
TC0100000560.mm.1	1.59962	1.46944	1.57255	1.63045	1.59975	NONMMUT001319	NONMMUT001319	NA	1.5687	1.57295	1.80497	1.64814	1.40336	1.50361	1.38698	1.61256	1.37462	1.56841	1.4911	1.59925	1.63145	1.61366	1.64909	1.7558	1.52123	1.61249	1.54774	1.71285	1.46082	1.60118	1.67617
TC0100000561.mm.1	6.89208	7.01554	6.94574	6.71404	7.01255	Rpe	NM_025683	ribulose-5-phosphate-3-epimerase	6.75555	6.70118	7.03086	7.09125	6.88157	6.91679	7.0287	6.83274	7.28393	7.05082	6.81978	7.04415	6.8682	6.57879	6.71841	6.67329	6.75745	6.84224	7.07062	6.68554	7.23573	6.92728	7.1436
TC0100000562.mm.1	4.30252	4.24493	4.27449	4.16176	4.05886	NONMMUT001323	NONMMUT001323	NA	3.95432	4.41874	4.13453	4.49012	4.51491	4.3766	4.13795	4.09891	4.36627	4.36664	4.27191	4.22282	4.2366	4.16878	4.22777	4.14905	4.13431	4.1289	4.22155	3.93087	3.73097	4.02463	4.38629
TC0100000563.mm.1	3.26623	3.18758	3.15186	3.19344	3.1081	NONMMUT001326	NONMMUT001326	NA	3.17315	3.45374	3.09637	3.46665	3.14124	3.16789	3.08589	3.26096	3.23559	3.27508	3.06379	3.14031	3.12826	3.3129	3.17598	3.20617	3.34555	2.92659	3.15849	3.16398	2.79446	3.08036	3.34321
TC0100000564.mm.1	3.49428	3.32781	3.55011	3.47855	3.13899	NONMMUT001329	NONMMUT001329	NA	3.20411	3.55664	3.30587	3.87524	3.52954	3.56744	3.18876	3.26338	3.29168	3.61755	3.61196	3.79906	3.17185	3.69904	3.34259	3.26893	3.88466	3.19751	3.51097	3.04105	2.94271	3.0374	3.16281
TC0100000565.mm.1	2.62832	2.58882	2.61846	2.55486	2.45885	NONMMUT001330	NONMMUT001330	NA	2.55194	2.76922	2.52642	2.78363	2.5104	2.66736	2.50532	2.57846	2.60415	2.75621	2.69792	2.48098	2.53872	2.82184	2.47494	2.51145	2.75837	2.20767	2.63927	2.41775	2.3187	2.38912	2.52944
TC0100000566.mm.1	2.91364	2.72943	2.73639	2.73346	2.57882	Gm15789	ENSMUST00000118992	predicted gene 15789	2.71964	3.18801	2.71498	3.01446	2.93112	2.85174	2.79925	2.6439	2.62285	3.08402	2.77638	2.64765	2.43754	3.03596	2.7856	2.36731	2.73979	2.73865	2.7335	2.33782	2.50613	2.63358	2.68307
TC0100000567.mm.1	2.52549	2.3819	2.60355	2.48878	2.31651	NONMMUT001336	NONMMUT001336	NA	2.51089	2.57217	2.4199	2.48616	2.63835	2.21465	2.35516	2.47416	2.48364	2.64834	2.44215	2.83662	2.48707	2.79418	2.38293	2.55125	2.39557	2.31995	2.31273	2.38101	2.29838	2.12593	2.46449
TC0100000568.mm.1	5.31501	4.61373	4.88525	5.19839	5.20967	XR_140439	XR_140439	Jackson Lab	4.98214	4.8514	5.10583	6.01036	5.62531	4.6952	4.69714	4.56826	4.49431	5.29563	4.73562	5.25125	4.25848	5.03958	4.93772	5.26949	5.56383	5.18132	5.40236	4.60796	5.07092	5.30498	5.66214
TC0100000569.mm.1	1.22526	1.18223	1.142	1.13602	1.21878	Gm26010	ENSMUST00000158795	predicted gene, 26010	1.13979	1.14162	1.00365	1.55434	1.28692	1.05866	1.15901	1.36887	1.14238	1.11116	1.17038	1.16047	1.12599	1.144	1.17889	1.056	1.16981	1.13139	1.26707	1.20791	1.4489	1.04643	1.12361
TC0100000570.mm.1	1.84042	1.79864	2.00443	1.92087	1.90418	Gm25832	ENSMUST00000104140	predicted gene, 25832	1.87868	1.83283	2.00489	1.90009	1.58562	1.86134	1.78638	1.89705	1.6498	1.75962	2.00343	2.10235	2.1523	1.89864	2.04497	1.89415	1.91057	1.85601	1.81175	1.9944	2.08412	1.73084	1.89979
TC0100000571.mm.1	1.83652	1.8503	1.95655	1.85144	1.82779	Gm15826	ENSMUST00000121328	predicted gene 15826	1.88375	1.88736	1.80991	1.69671	1.90486	1.88551	1.84728	1.99165	1.67675	1.83395	1.86841	2.19401	1.92983	1.71344	1.77715	1.96901	1.92974	1.86786	1.76292	2.10217	1.7512	1.67598	1.8467
TC0100000572.mm.1	2.13369	2.08496	2.1326	2.13486	2.10535	Cps1	NM_001080809	carbamoyl-phosphate synthetase 1	2.07165	2.08787	2.11888	2.12137	2.26866	2.09114	2.0645	2.10524	2.07898	2.03839	2.11703	2.17564	2.19935	2.14214	2.1104	2.2052	2.09201	2.12457	2.07412	2.2057	2.09603	2.08714	2.06376
TC0100000573.mm.1	1.46581	1.48819	1.43101	1.50723	1.51095	Gm15668	ENSMUST00000140506	predicted gene 15668	1.50384	1.45076	1.38714	1.50315	1.48418	1.51057	1.42255	1.49316	1.52648	1.49648	1.3515	1.45465	1.42142	1.53146	1.42135	1.53468	1.52213	1.52654	1.54028	1.49193	1.49163	1.45301	1.57788
TC0100000574.mm.1	1.42743	1.35395	1.5197	1.48395	1.54695	Gm26342	ENSMUST00000104557	predicted gene, 26342	1.34131	1.54327	1.45054	1.4253	1.37672	1.27857	1.39785	1.39913	1.34025	1.33761	1.50237	1.51739	1.72145	1.46891	1.47711	1.55801	1.53973	1.37602	1.54397	1.55878	1.7002	1.44932	1.48248
TC0100000575.mm.1	2.06145	2.00554	2.05981	2.05201	2.03515	Kif22-ps	ENSMUST00000119302	kinesin family member 22, pseudogene	1.97631	2.00524	2.19343	2.06279	2.06947	1.91388	2.07774	1.92407	2.10649	1.90424	2.10712	2.15413	2.07376	2.02862	2.06165	2.17253	1.88719	2.11007	2.07594	2.02902	1.75856	2.23644	2.07578
TC0100000576.mm.1	9.0091	8.85055	8.75001	9.01397	8.87064	Gm22548	ENSMUST00000174899	predicted gene, 22548	8.88425	9.09863	9.01425	9.04758	9.00078	8.76393	8.93744	8.81754	8.88327	8.74487	8.90873	8.75683	8.5896	9.21156	8.95491	9.03646	8.95266	8.91429	8.77309	8.86123	8.92633	8.82882	8.96372
TC0100000577.mm.1	1.17938	1.16968	1.21324	1.20195	1.21505	Gm15669	ENSMUST00000147834	predicted gene 15669	1.17151	1.13399	1.19867	1.15721	1.23552	1.06769	1.23734	1.10634	1.26735	1.20654	1.1375	1.23974	1.2692	1.04815	1.21019	1.23459	1.20519	1.31164	1.36762	1.30718	1.07373	1.24508	1.08163
TC0100000578.mm.1	1.26616	1.29937	1.39255	1.28169	1.25353	KnowTID_00000078	KnowTID_00000078	NA	1.2459	1.18444	1.38472	1.36414	1.1516	1.47614	1.31974	1.27478	1.12682	1.35774	1.27111	1.40318	1.53818	1.29198	1.28602	1.30533	1.33184	1.19331	1.24538	1.35132	1.21724	1.15413	1.29961
TC0100000579.mm.1	10.5052	10.4023	10.335	10.4823	10.463	Gm23189	ENSMUST00000178954	predicted gene, 23189	10.396	10.5623	10.4171	10.5695	10.581	10.3133	10.5033	10.3493	10.4433	10.2883	10.4989	10.3365	10.2162	10.6083	10.465	10.5079	10.4141	10.4163	10.4582	10.4371	10.4466	10.4428	10.5304
TC0100000580.mm.1	1.46356	1.54387	1.55413	1.47539	1.56898	Gm15671	ENSMUST00000124160	predicted gene 15671	1.57077	1.30959	1.44143	1.42536	1.57065	1.44167	1.65525	1.65931	1.41926	1.76023	1.47491	1.44925	1.53211	1.46489	1.50648	1.5295	1.3962	1.47988	1.66303	1.5743	1.56244	1.49301	1.55212
TC0100000581.mm.1	1.69948	1.68147	1.70131	1.75585	1.77681	KnowTID_00000079	KnowTID_00000079	NA	1.8978	1.5257	1.80308	1.53278	1.73802	1.73699	1.84712	1.59912	1.54267	1.50782	1.64517	1.62348	2.02875	1.71528	1.98278	1.73143	1.54859	1.80116	1.6025	1.97947	1.77508	1.5847	1.94228
TC0100000582.mm.1	1.96577	1.91514	2.02829	1.89873	1.92981	NONMMUT001398	NONMMUT001398	NA	2.03547	1.93463	1.98212	1.87462	2.00203	1.94344	1.8764	1.80642	2.03432	1.96962	2.147	1.90612	2.09039	2.04128	1.91953	1.76482	1.8082	1.95984	1.92767	1.86999	1.97172	1.87995	1.99971
TC0100000583.mm.1	1.25418	1.30793	1.1924	1.26746	1.2729	NONMMUT001404	NONMMUT001404	NA	1.20425	1.32888	1.27469	1.26982	1.19324	1.32547	1.29787	1.24302	1.36535	1.24645	1.27042	1.21339	1.03933	1.16152	1.52136	1.23893	1.20061	1.21488	1.30991	1.1487	1.35428	1.30205	1.24959
TC0100000584.mm.1	3.0868	3.03711	3.2322	3.21453	3.13397	NONMMUT001407	NONMMUT001407	NA	3.25817	3.34257	2.99033	2.99519	2.84773	3.26291	3.14198	2.94168	2.80185	3.10203	3.32018	3.17903	3.32756	3.13869	3.34478	3.21553	3.23596	3.13768	2.92103	3.20808	3.0603	3.32466	3.15579
TC0100000585.mm.1	1.62773	1.61601	1.64718	1.63207	1.67314	Spag16	NM_001271533	sperm associated antigen 16	1.73378	1.54851	1.5978	1.60532	1.65322	1.64694	1.53272	1.65489	1.6295	1.65937	1.61314	1.619	1.69721	1.62616	1.6447	1.66157	1.61921	1.60873	1.67431	1.66774	1.69591	1.71224	1.61552
TC0100000586.mm.1	5.67153	5.337	5.30348	5.64505	5.60074	NONMMUT001411	NONMMUT001411	NA	5.56843	5.65878	5.6686	5.82456	5.63729	5.33566	5.43939	5.34842	5.22454	5.05965	5.50465	5.28519	5.36443	5.6614	5.60906	5.76401	5.61113	5.57965	5.49653	5.54352	5.76318	5.56511	5.63534
TC0100000587.mm.1	2.59676	2.54918	2.32683	2.52719	2.54304	Gm23422	ENSMUST00000102000	predicted gene, 23422	2.4624	2.65423	2.88869	2.47056	2.50792	2.66831	2.38951	2.55122	2.58766	2.21036	2.62002	2.14317	2.33378	2.51899	2.57103	2.58991	2.55199	2.40404	2.44699	2.74037	2.51725	2.43303	2.57756
TC0100000588.mm.1	1.93595	1.73838	1.863	2.45732	2.35082	Vwc2l	NM_177164	von Willebrand factor C domain-containing protein 2-like	1.90729	1.67882	2.38581	1.73593	1.97189	1.671	1.8498	1.73359	1.69915	1.77934	1.89257	1.79559	1.98449	1.89982	1.82114	4.91939	1.85064	1.79563	1.84442	1.8643	3.0978	2.98568	1.9619
TC0100000589.mm.1	3.97451	3.94171	4.07407	4.05429	4.00786	NONMMUT001417	NONMMUT001417	NA	4.03274	3.89568	4.06278	3.98046	3.90091	3.95509	3.93021	4.1005	3.78102	4.18505	4.08777	3.87356	4.14987	4.09876	3.97888	4.02998	4.05046	4.11338	3.88297	4.26102	3.87942	3.97833	4.03753
TC0100000590.mm.1	5.76617	5.95193	5.86991	5.77556	5.82929	Atic	NM_026195	5-aminoimidazole-4-carboxamide ribonucleotide formyltransferase/IMP cyclohydrolase	5.88057	5.7689	5.61637	5.76473	5.80027	5.87586	5.96502	5.96601	6.00083	5.91596	5.84901	5.83297	5.8817	5.68549	5.80985	5.83732	5.81302	5.73213	5.89379	5.88273	5.82969	5.79319	5.74705
TC0100000591.mm.1	2.22651	2.15616	2.23488	2.12175	2.08081	Apol7d	NR_040308	apolipoprotein L 7d	2.23563	2.2263	2.02368	2.23237	2.41459	2.08953	2.13052	2.23309	2.17152	2.31443	2.19627	2.26801	2.16082	2.18646	2.13183	2.07882	2.09283	2.11883	2.06463	2.20985	1.907	2.1323	2.09029
TC0100000592.mm.1	2.19777	2.48052	2.26513	2.26838	2.14376	NONMMUT001426	NONMMUT001426	NA	2.3676	2.0173	2.14758	2.20577	2.25059	2.69264	2.36882	2.54054	2.32008	2.31035	2.33622	2.29259	2.12136	2.18173	2.31968	2.27751	2.43691	2.12606	2.23422	2.3568	1.88343	2.09022	2.15412
TC0100000593.mm.1	2.94154	2.98884	3.03272	3.06379	2.96445	Gm8883	NR_027658	predicted gene 8883	2.95838	2.91266	2.99557	3.03806	2.80304	3.01869	2.95917	3.16341	2.81408	3.00668	3.15332	2.89516	3.07571	3.09056	3.01979	3.07894	3.05892	3.07076	2.87897	3.08888	2.84697	3.11218	2.89526
TC0100000594.mm.1	10.3922	10.3148	10.3278	10.3889	10.3838	Gm5528	XM_484880	predicted gene 5528	10.3423	10.3276	10.5238	10.3557	10.4118	10.3816	10.3184	10.3001	10.2593	10.3125	10.3546	10.3607	10.2834	10.4643	10.39	10.3608	10.3916	10.3378	10.4647	10.3333	10.519	10.3509	10.2508
TC0100000595.mm.1	2.11754	2.19168	2.19247	2.2029	2.16382	NONMMUT001439	NONMMUT001439	NA	2.03	2.1373	2.10161	2.20676	2.11205	2.16076	2.2714	2.24118	2.09337	2.09099	2.08792	2.26716	2.32382	2.21721	2.05314	2.34663	2.10964	2.28786	1.92619	2.27394	2.31574	2.15891	2.14432
TC0100000596.mm.1	7.01522	6.7473	6.77104	6.81672	6.8906	Gm25360	ENSMUST00000178786	predicted gene, 25360	6.89527	7.02672	7.5024	6.82788	6.82382	6.93853	6.77607	6.73008	6.54453	6.8186	6.85327	6.64686	6.76542	6.58328	6.73806	6.6891	6.97311	7.10007	6.84412	6.77302	7.22368	6.70533	6.90687
TC0100000597.mm.1	4.00898	4.12729	4.10838	4.10827	4.12339	D230017M19Rik	ENSMUST00000180722	RIKEN cDNA D230017M19 gene	4.33782	3.87053	3.95782	3.98483	3.89394	4.08244	4.1871	4.16567	4.07396	4.00954	4.17058	4.11514	4.13826	4.16453	4.11691	4.07956	4.13994	4.04044	4.1713	4.18403	4.057	4.09495	4.10967
TC0100000598.mm.1	8.63714	8.39776	8.36385	8.44836	8.54987	Gm23472	ENSMUST00000101806	predicted gene, 23472	8.55772	8.66023	9.03576	8.42754	8.50447	8.55832	8.41443	8.41551	8.20276	8.40935	8.50939	8.28252	8.25416	8.20156	8.38967	8.33294	8.63053	8.6871	8.46684	8.4252	8.81293	8.35958	8.68482
TC0100000599.mm.1	8.64742	8.40953	8.33428	8.47033	8.56812	Gm24497	ENSMUST00000177868	predicted gene, 24497	8.56767	8.66737	9.04549	8.44665	8.50991	8.58114	8.42371	8.42288	8.21038	8.42159	8.52071	8.24984	8.14496	8.25034	8.38985	8.36575	8.64498	8.70072	8.47794	8.4925	8.81659	8.36177	8.69179
TC0100000600.mm.1	7.63575	7.36184	7.34137	7.44608	7.60904	Gm25939	ENSMUST00000179876	predicted gene, 25939	7.55732	7.68218	8.02096	7.41928	7.49902	7.48766	7.40517	7.37433	7.1802	7.38843	7.48636	7.21513	7.27558	7.23918	7.34064	7.32011	7.59883	7.73166	7.45791	7.64193	7.82443	7.40309	7.71785
TC0100000601.mm.1	2.96779	2.97181	2.9561	3.02437	3.06016	Tmem169	NM_175564	transmembrane protein 169	2.966	3.01188	3.02045	2.91534	2.92527	2.91565	2.96986	3.06016	2.94157	2.82059	2.99213	2.92635	3.08533	3.00279	2.98663	3.40024	2.80356	2.92862	3.12024	3.03333	3.1483	3.03833	2.96059
TC0100000602.mm.1	5.94484	6.06759	6.16635	5.92539	6.06704	Xrcc5	NM_009533	X-ray repair complementing defective repair in Chinese hamster cells 5	6.1756	5.88511	5.90663	5.96799	5.78885	5.97053	6.0358	6.12625	6.13776	6.26319	6.19979	6.1132	6.08922	5.90861	6.04663	6.02723	6.09802	5.54645	6.24289	5.99612	6.09327	6.0623	5.94061
TC0100000603.mm.1	1.90277	2.02564	1.97598	2.03066	1.93365	NONMMUT001452	NONMMUT001452	NA	1.65381	1.92275	1.91355	2.03444	1.9893	1.87968	1.75976	2.14093	2.32218	2.02141	1.92093	1.92081	2.04078	2.1461	2.04268	2.18706	1.93416	1.84331	1.92969	1.92969	1.99725	1.84042	1.97118
TC0100000604.mm.1	1.99959	2.02701	2.07475	1.97046	1.88551	NONMMUT001453	NONMMUT001453	NA	1.9999	1.92651	2.01618	2.27174	1.78361	2.15465	2.13562	1.73109	2.0867	1.94285	1.92704	2.24256	2.18656	2.04934	1.95695	2.08943	1.8419	1.9147	1.74135	2.09903	1.87257	1.70356	2.01105
TC0100000605.mm.1	9.07947	8.85075	8.85592	8.99128	9.00461	Gm15843	ENSMUST00000146593	predicted gene 15843	8.95369	9.05773	9.326	8.98465	9.0753	9.06961	8.8473	8.8797	8.60641	8.84638	8.92735	8.86207	8.78786	9.04231	8.95824	8.87993	9.07881	8.99713	8.9863	8.95016	9.20145	8.95606	8.92908
TC0100000606.mm.1	2.00725	2.11093	2.07824	2.13885	2.0059	KnowTID_00000082	KnowTID_00000082	NA	2.14105	2.1215	1.91035	1.94857	1.91478	2.18418	1.98726	2.18829	2.08401	2.11909	2.01168	2.15306	2.02914	2.04095	2.30737	2.18291	1.98506	2.17796	1.9537	2.16698	2.06153	1.96374	1.88352
TC0100000607.mm.1	1.71851	1.63188	1.80056	1.72326	1.70765	NONMMUT001457	NONMMUT001457	NA	1.74448	1.72731	1.77917	1.75878	1.58281	1.56406	1.57296	1.77731	1.61317	1.72462	1.72288	1.90463	1.85012	1.63067	1.70578	1.96412	1.62069	1.69502	1.69261	1.86575	1.64078	1.6798	1.65931
TC0100000608.mm.1	5.58476	5.78644	5.60631	5.72294	5.64759	Smarcal1	NM_018817	SWI/SNF related matrix associated, actin dependent regulator of chromatin, subfamily a-like 1	5.69618	5.54631	5.46565	5.55102	5.66465	5.70845	5.77781	5.8617	5.7978	5.70787	5.61695	5.60959	5.49083	5.5448	5.71358	6.08507	5.64103	5.6302	5.6754	5.64947	5.65526	5.66113	5.59671
TC0100000609.mm.1	7.97196	7.79983	7.74066	7.8294	7.84165	Rpl37a	NM_009084	ribosomal protein L37a	7.82094	7.84485	8.27317	7.81809	8.10276	7.7968	7.78647	7.90492	7.71111	7.74432	7.78451	7.74211	7.69173	7.76583	7.83891	7.80191	7.8411	7.89925	7.83357	7.823	8.15363	7.73595	7.6621
TC0100000610.mm.1	5.85858	6.0988	6.07805	5.68056	5.95869	Igfbp2	NM_008342	insulin-like growth factor binding protein 2	5.41455	6.34884	6.11559	5.63812	5.77582	6.5242	5.81542	6.1104	5.94519	5.85729	6.4828	5.9441	6.02802	5.47578	5.56302	5.72815	5.82605	5.80982	6.11641	6.38798	5.68956	5.95164	5.64786
TC0100000611.mm.1	2.77627	2.80556	2.78481	2.78866	2.74424	NONMMUT001470	NONMMUT001470	NA	2.6794	2.64307	2.72719	2.74608	3.08562	2.77311	2.73256	2.81374	2.90285	2.70389	2.67497	2.8981	2.86227	2.6478	2.76895	2.84056	2.8667	2.81928	2.69756	2.93525	2.53608	2.81874	2.7336
TC0100000612.mm.1	2.51191	2.51492	2.56911	2.5278	2.52702	NONMMUT001473	NONMMUT001473	NA	2.60586	2.47419	2.50917	2.51366	2.45665	2.60554	2.50814	2.47856	2.46742	2.46719	2.53973	2.58396	2.68558	2.54635	2.48086	2.57819	2.51488	2.5187	2.62905	2.52688	2.54739	2.52433	2.40742
TC0100000613.mm.1	2.35321	2.23908	2.34484	2.3749	2.36219	KnowTID_00000083	KnowTID_00000083	NA	2.34488	2.33201	2.46333	2.31422	2.31161	2.32038	2.25522	2.26542	2.1153	2.40518	2.31329	2.2315	2.42937	2.45223	2.30548	2.35265	2.34457	2.41955	2.2463	2.47796	2.39936	2.3379	2.34943
TC0100000614.mm.1	4.38265	4.38579	4.40144	4.31505	4.36259	KnowTID_00000084	KnowTID_00000084	NA	4.57263	4.17032	4.5181	4.18923	4.46298	4.46368	4.2811	4.57029	4.22812	4.16791	4.53311	4.37522	4.52954	4.29881	4.16299	4.3371	4.32247	4.45389	4.31984	4.49109	4.42092	4.41647	4.16466
TC0100000615.mm.1	2.51426	2.56147	2.62521	2.67378	2.57351	1700027A15Rik	NR_038001	RIKEN cDNA 1700027A15 gene	2.53486	2.53528	2.67087	2.41658	2.41369	2.54396	2.52685	2.68669	2.48839	2.55682	2.67537	2.50189	2.76674	2.72984	2.58153	2.62165	2.75706	2.67882	2.51941	2.71494	2.52479	2.58656	2.52185
TC0100000616.mm.1	1.13026	1.16835	1.14836	1.17994	1.125	NONMMUT001491	NONMMUT001491	NA	1.0397	1.03652	1.15841	1.12629	1.2904	1.09105	1.20948	1.25044	1.12244	1.1055	1.23921	1.1094	1.13931	1.23736	1.08718	1.09508	1.23792	1.24217	1.05252	0.986358	1.26656	1.20174	1.11781
TC0100000617.mm.1	2.56115	2.56223	2.57221	2.53235	2.5153	Pinc	ENSMUST00000183977	pregnancy induced noncoding RNA	2.81859	2.6057	2.57215	2.62114	2.18819	2.4267	2.5219	2.67713	2.62318	2.43315	2.43055	2.78279	2.64237	2.70375	2.44689	2.60758	2.56322	2.3403	2.75302	2.7669	2.20791	2.42531	2.42336
TC0100000618.mm.1	2.28049	2.23918	2.38476	2.32615	2.32694	D530049I02Rik	NR_040605	RIKEN cDNA D530049I02 gene	2.23128	2.37997	2.31542	2.3373	2.13847	2.35984	2.33023	2.21103	2.05561	2.07772	2.50029	2.33884	2.62221	2.35435	2.32489	2.22357	2.36815	2.3598	2.18849	2.45464	2.42231	2.2046	2.36468
TC0100000619.mm.1	1.15567	1.22191	1.17373	1.17918	1.18061	Gm25329	ENSMUST00000158041	predicted gene, 25329	1.16901	1.29194	1.38697	0.966472	0.963969	1.21521	1.26758	1.28237	1.1225	1.22437	1.19219	1.10534	1.173	1.15094	1.12371	1.29228	1.22193	1.10707	1.039	1.19295	1.25916	1.34189	1.07004
TC0100000620.mm.1	3.54873	3.7015	3.65678	3.68361	3.74604	NONMMUT001512	NONMMUT001512	NA	3.41338	3.623	3.48735	3.59306	3.62685	3.85105	3.57692	3.64914	3.72889	3.36851	3.87687	3.70201	3.67974	3.75714	4.01851	3.70099	3.59669	3.3447	3.54881	3.89022	3.68114	3.71542	3.89463
TC0100000621.mm.1	3.89425	3.92154	4.00094	3.99675	4.02605	Rufy4	NM_001034060	RUN and FYVE domain containing 4	3.93123	3.83322	3.87715	3.97456	3.8551	3.96512	3.87829	3.92758	3.91518	3.82378	4.08246	3.97936	4.11815	4.03302	4.01968	4.00768	3.96378	3.95959	3.8492	4.21627	4.07193	4.02111	3.97176
TC0100000622.mm.1	4.22478	3.98388	3.97672	4.11307	4.08791	Cxcr2	NM_009909	chemokine (C-X-C motif) receptor 2	4.0243	4.25128	4.60258	3.99576	4.24999	4.00431	4.04324	3.94252	3.94546	3.97429	3.91189	3.96926	4.05146	3.89302	4.18559	3.99886	4.09201	4.39586	4.03038	3.83814	4.39913	3.98962	4.18226
TC0100000623.mm.1	1.3472	1.28708	1.2993	1.28142	1.40605	Gm25524	ENSMUST00000101821	predicted gene, 25524	1.22942	1.37717	1.55963	1.29916	1.27064	1.31117	1.20575	1.28854	1.34284	1.23972	1.38228	1.21545	1.35974	1.25544	1.21121	1.27097	1.21146	1.45802	1.339	1.37907	1.70572	1.32604	1.28043
TC0100000624.mm.1	1.6186	1.50639	1.59131	1.60986	1.53242	NONMMUT001518	NONMMUT001518	NA	1.66508	1.62531	1.74038	1.61807	1.44417	1.60956	1.51381	1.58218	1.32001	1.5473	1.4852	1.62197	1.71075	1.42718	1.54971	1.75093	1.73983	1.58167	1.45317	1.5469	1.50635	1.55419	1.60149
TC0100000625.mm.1	9.03035	9.05995	9.0561	8.96557	8.99884	Arpc2	NM_029711	actin related protein 2/3 complex, subunit 2	9.06253	9.13946	9.06157	8.92475	8.96344	9.08944	9.03302	9.07596	9.04137	9.05985	9.09067	9.0078	9.06607	9.01351	9.00064	8.89712	8.97184	8.94474	9.05039	9.04407	8.91705	9.03795	8.94474
TC0100000626.mm.1	4.57143	4.52548	4.64251	4.51291	4.55956	Gpbar1	NM_174985	G protein-coupled bile acid receptor 1	4.73347	4.67137	4.68051	4.4505	4.32129	4.48185	4.42488	4.66068	4.53451	4.67119	4.66286	4.42762	4.80839	4.55326	4.62048	4.41258	4.70864	4.26961	4.45952	4.65066	4.50975	4.78873	4.38912
TC0100000627.mm.1	5.64542	5.67142	5.71589	5.67455	5.74469	Pnkd	NM_001039509	paroxysmal nonkinesiogenic dyskinesia	5.72693	5.50502	5.72868	5.66695	5.59955	5.75615	5.60515	5.71296	5.61143	5.75353	5.65061	5.70899	5.75042	5.64945	5.7469	5.67083	5.71621	5.58938	5.81245	5.78773	5.65048	5.74478	5.728
TC0100000628.mm.1	3.50687	3.70275	3.65627	3.61084	3.47013	NONMMUT001523	NONMMUT001523	NA	3.57204	3.48856	3.51607	3.57065	3.38704	3.56376	3.806	3.77735	3.66387	3.49417	3.5929	3.61686	3.92115	3.82741	3.69163	3.537	3.53869	3.45945	3.46132	3.80883	3.12799	3.36122	3.59127
TC0100000629.mm.1	4.12929	4.06784	4.24367	4.30275	4.15148	NONMMUT001524	NONMMUT001524	NA	4.25259	4.13192	4.0176	3.96933	4.27502	4.0679	4.16465	3.95956	4.07926	4.03164	4.3267	4.20097	4.41539	4.30348	4.37539	4.33553	4.30368	4.19568	4.07877	4.30601	4.05428	4.13935	4.179
TC0100000630.mm.1	1.98354	1.92279	1.98965	2.01569	2.07463	NONMMUT001525	NONMMUT001525	NA	2.08888	2.0622	2.00213	2.03115	1.73335	2.05155	1.98597	1.79729	1.85633	1.97917	1.95121	2.03478	1.99346	2.02166	2.28097	2.0604	1.88331	1.83211	2.07543	2.1641	2.10333	2.07988	1.95043
TC0100000631.mm.1	3.14665	3.10533	3.20212	3.19156	3.16138	Catip	NM_001033345	ciliogenesis associated TTC17 interacting protein	3.19114	3.18556	3.21411	3.09796	3.04448	3.13316	3.14933	3.15963	2.97918	3.12397	3.16548	3.24518	3.27384	3.24573	3.1642	3.17058	3.20292	3.17439	3.10095	3.21084	3.12941	3.2042	3.16152
TC0100000632.mm.1	7.33437	7.01789	6.8436	6.70251	7.09939	Slc11a1	NM_013612	solute carrier family 11 (proton-coupled divalent metal ion transporters), member 1	6.54881	7.92502	8.12826	6.75063	7.31911	7.23846	6.86648	6.8973	7.06933	6.541	6.89483	6.74727	7.19132	6.65278	6.61402	5.75117	7.05132	7.44325	6.93451	7.21818	7.20041	7.35476	6.78911
TC0100000633.mm.1	7.05162	7.12031	7.0947	7.04547	7.05944	Ctdsp1	NM_153088	CTD (carboxy-terminal domain, RNA polymerase II, polypeptide A) small phosphatase 1	7.23899	6.97228	6.91182	7.04743	7.08758	7.10016	7.10012	7.14626	7.13469	7.10643	7.06344	7.12714	7.0818	7.03224	7.09146	7.03921	7.03127	7.03319	7.05685	7.16523	7.01539	7.01955	7.04018
TC0100000634.mm.1	4.62736	4.47062	4.62795	4.63115	4.59408	Mir26b	NR_029743	microRNA 26b	4.61757	4.79466	4.73155	4.43123	4.56179	4.60308	4.52139	4.41784	4.34016	4.63004	4.43595	4.75058	4.69522	4.66243	4.55437	4.59064	4.74771	4.60063	4.49975	4.73817	4.63591	4.4273	4.66927
TC0100000635.mm.1	3.14006	3.16669	3.18734	3.20313	3.18468	Vil1	NM_009509	villin 1	3.20631	3.05496	3.18953	3.11833	3.13117	3.21982	3.13856	3.26326	3.0451	3.1035	3.16219	3.18006	3.3036	3.28511	3.16992	3.1623	3.17527	3.22306	3.11053	3.28007	3.2054	3.17505	3.15233
TC0100000636.mm.1	6.36681	6.36627	6.30372	6.24199	6.31102	Rqcd1	NM_021383	rcd1 (required for cell differentiation) homolog 1 (S. pombe)	6.30768	6.50095	6.42735	6.31883	6.27925	6.35715	6.34348	6.36103	6.40343	6.38249	6.26787	6.31916	6.24535	6.14183	6.31412	6.0943	6.32646	6.33324	6.38291	6.28138	6.23528	6.39583	6.2597
TC0100000637.mm.1	2.15188	2.15649	2.20701	2.19119	2.19492	Plcd4	NM_001081456	phospholipase C, delta 4	2.17217	2.09643	2.14651	2.1634	2.18087	2.13787	2.13812	2.15141	2.19857	2.22417	2.16559	2.16495	2.27333	2.27081	2.16538	2.12337	2.21006	2.18633	2.17932	2.24382	2.15455	2.24561	2.15127
TC0100000638.mm.1	5.62059	5.78483	5.75035	5.67113	5.87891	Bcs1l	NM_025784	BCS1-like (yeast)	5.82862	5.55997	5.5086	5.65191	5.55384	5.77257	5.86663	5.7455	5.75462	5.77312	5.71656	5.79371	5.718	5.49915	5.77252	5.66098	5.74791	5.67508	5.99517	5.85034	5.83529	5.77314	5.9406
TC0100000639.mm.1	3.99027	4.05989	4.0671	4.03443	4.00578	Stk36	NM_175031	serine/threonine kinase 36	4.11942	3.95719	3.93958	3.93367	4.00151	4.12608	4.0878	4.08114	3.94452	4.00643	4.05993	4.06092	4.14111	4.02094	4.05847	4.01348	4.07817	4.00108	3.98475	4.16168	3.91388	3.99729	3.97131
TC0100000640.mm.1	5.10059	5.28913	5.156	5.09594	5.11463	Ttll4	NM_001014974	tubulin tyrosine ligase-like family, member 4	5.08999	5.17464	4.88246	5.17318	5.18269	5.1429	5.29197	5.26092	5.46073	5.20125	5.08883	5.15178	5.18215	5.15605	5.09133	4.92988	4.98433	5.31813	5.06841	5.18295	4.96685	5.12232	5.2326
TC0100000641.mm.1	3.06585	3.35393	3.06366	3.08294	3.06426	NONMMUT001547	NONMMUT001547	NA	2.94135	3.14173	2.98083	3.1787	3.08663	3.10095	3.27323	3.3536	3.68793	3.0981	3.02624	3.21179	2.91851	2.89815	3.00182	3.17165	2.94881	3.39425	3.15939	3.03361	3.11445	3.04031	2.97355
TC0100000642.mm.1	6.42999	6.21023	6.28938	6.46732	6.41061	Cyp27a1	NM_024264	cytochrome P450, family 27, subfamily a, polypeptide 1	6.42245	6.23559	6.54081	6.42504	6.52606	6.42195	6.0544	6.17246	6.19212	6.40856	6.25742	6.36032	6.1312	6.73188	6.49568	6.20835	6.52772	6.37299	6.38912	6.36015	6.75804	6.3095	6.23624
TC0100000643.mm.1	1.39097	1.41281	1.4952	1.41703	1.40848	ENSMUST00000184199	ENSMUST00000184199	ncrna:known chromosome:GRCm38:1:74764798:74764890:1 gene:ENSMUSG00000098351 gene_biotype:misc_RNA transcript_biotype:misc_RNA	1.35276	1.43251	1.38406	1.4265	1.35901	1.26349	1.43074	1.46069	1.49632	1.50368	1.52717	1.49059	1.45937	1.4267	1.27948	1.50719	1.41628	1.45552	1.33549	1.28888	1.42961	1.4968	1.49163
TC0100000644.mm.1	3.50382	3.46834	3.49894	3.57595	3.5459	Wnt6	NM_009526	wingless-type MMTV integration site family, member 6	3.59661	3.45069	3.52601	3.48767	3.45814	3.50619	3.39498	3.57054	3.40167	3.34654	3.50683	3.48298	3.6594	3.57387	3.52668	3.59194	3.54279	3.64448	3.39184	3.66319	3.65015	3.55354	3.47077
TC0100000645.mm.1	4.38078	4.40147	4.46443	4.47197	4.47851	Wnt10a	NM_009518	wingless-type MMTV integration site family, member 10A	4.57903	4.32253	4.43779	4.26945	4.29509	4.36338	4.51062	4.40358	4.32829	4.28298	4.4909	4.49509	4.58877	4.58545	4.58048	4.40768	4.28149	4.50476	4.29045	4.62782	4.45186	4.57151	4.4509
TC0100000646.mm.1	3.96507	3.97495	4.01346	4.03473	3.97962	NONMMUT001554	NONMMUT001554	NA	4.10299	3.85761	4.01349	3.91699	3.93426	3.92815	4.04333	3.94392	3.98439	3.81003	4.02615	3.96062	4.25704	4.21167	4.09125	4.0651	3.8909	3.91471	3.89519	4.04962	4.00678	3.9984	3.9481
TC0100000647.mm.1	3.03254	3.01846	3.03986	2.94259	2.94784	Gm16582	ENSMUST00000159627	predicted gene 16582	3.11355	2.98652	3.0063	3.02995	3.02636	3.09897	3.01355	3.01247	2.94885	3.05305	3.15907	3.00579	2.94152	3.06114	2.82595	3.07608	2.79143	2.95835	2.93984	3.09267	3.06689	2.7877	2.85207
TC0100000648.mm.1	4.8034	4.7248	4.78365	4.84907	4.81513	Cdk5r2	NM_009872	cyclin-dependent kinase 5, regulatory subunit 2 (p39)	4.83529	4.76392	4.8252	4.68135	4.91124	4.84543	4.7308	4.76862	4.55434	4.76402	4.77892	4.7184	4.87324	4.84164	4.67368	5.03957	4.803	4.88746	4.68829	5.00299	4.81376	4.93154	4.63905
TC0100000649.mm.1	3.14939	3.1291	3.20468	3.29216	3.10892	NONMMUT001559	NONMMUT001559	NA	3.13061	3.27691	3.20941	2.96063	3.1694	3.32299	3.02743	3.03678	3.12921	3.2073	3.24116	3.15802	3.21226	3.36897	3.32433	3.42474	3.00776	3.33498	3.1608	3.13735	3.16195	3.00994	3.07458
TC0100000650.mm.1	3.17427	3.17152	3.23995	3.15954	3.17588	Gm15841	ENSMUST00000160540	predicted gene 15841	3.33361	3.11078	3.27027	3.16476	2.99194	3.06634	3.06883	3.42244	3.12848	3.23055	3.29838	3.16517	3.26569	3.08346	3.18733	3.14066	3.23713	3.14914	3.19117	3.12913	3.35632	3.13896	3.0638
TC0100000651.mm.1	1.63876	1.62444	1.66747	1.60968	1.56548	KnowTID_00000086	KnowTID_00000086	NA	1.61555	1.73326	1.62328	1.58538	1.63634	1.61221	1.55743	1.62456	1.70355	1.57632	1.66853	1.77324	1.65177	1.60583	1.60479	1.57698	1.62764	1.63317	1.49788	1.67226	1.63219	1.51593	1.50915
TC0100000652.mm.1	6.65839	6.6059	6.55931	6.66076	6.62821	Fam134a	NM_170755	family with sequence similarity 134, member A	6.66343	6.7041	6.63521	6.61221	6.67698	6.60574	6.59498	6.59247	6.63042	6.58113	6.48707	6.54511	6.62393	6.62774	6.60504	6.68388	6.64105	6.74608	6.60357	6.75249	6.57033	6.59251	6.62214
TC0100000653.mm.1	5.24194	5.20653	5.18385	5.26363	5.24487	Zfand2b	NM_001159905	zinc finger, AN1 type domain 2B	5.3159	5.21269	5.22517	5.18785	5.26806	5.23942	5.2818	5.22353	5.08136	5.16854	5.15717	5.16204	5.24765	5.22414	5.26718	5.28589	5.26118	5.27973	5.20252	5.40565	5.20615	5.17467	5.23535
TC0100000654.mm.1	4.02383	3.96657	4.03986	4.08822	3.95609	Ankzf1	NM_001267620	ankyrin repeat and zinc finger domain containing 1	4.06495	4.0707	3.86856	4.07485	4.04011	4.02273	3.9645	3.9976	3.88144	4.0875	4.00665	4.06963	3.99565	4.05821	4.15154	4.04219	4.1137	4.07544	3.9956	3.9999	3.87425	3.89056	4.02011
TC0100000655.mm.1	6.44714	6.675	6.55121	6.50523	6.58999	Stk16	NM_001277992	serine/threonine kinase 16	6.58717	6.32884	6.3429	6.43531	6.54148	6.74036	6.58963	6.67275	6.69725	6.7191	6.40269	6.59222	6.49084	6.33867	6.67842	6.44118	6.54328	6.5246	6.72942	6.64603	6.53417	6.54093	6.49942
TC0100000656.mm.1	5.30549	5.48194	5.41798	5.43667	5.41381	Dnajb2	NM_001159883	DnaJ (Hsp40) homolog, subfamily B, member 2	5.46079	5.24721	5.21565	5.3412	5.26259	5.41151	5.53412	5.48153	5.50062	5.38118	5.37038	5.40935	5.51102	5.36768	5.45169	5.44567	5.38119	5.53714	5.35963	5.4995	5.33604	5.4071	5.46679
TC0100000657.mm.1	7.62329	7.87407	7.89881	7.93529	7.72651	Des	NM_010043	desmin	7.91076	7.53673	7.13574	7.7275	7.80573	7.93271	7.84716	7.69862	8.01778	7.69197	8.10138	8.09998	7.70191	8.07726	7.91432	7.79826	7.95774	7.92887	7.99059	7.73664	7.35141	7.91526	7.63867
TC0100000658.mm.1	5.75941	6.06889	6.01411	5.97364	5.79699	Speg	NM_001085370	SPEG complex locus	6.16586	5.77611	5.33143	5.80663	5.71704	5.95412	6.13043	6.15717	6.03382	6.0558	5.96889	6.02741	6.00435	5.8724	6.12167	6.03186	5.9684	5.87388	5.93366	6.03683	5.40769	5.83968	5.76711
TC0100000659.mm.1	6.98261	7.2025	7.13916	7.04159	7.13412	Gmppa	NM_133708	GDP-mannose pyrophosphorylase A	7.22438	7.11521	6.78297	6.85855	6.93192	7.10063	7.24134	7.28859	7.17946	7.26391	7.11608	7.12009	7.05657	6.85499	7.17014	7.12769	7.1553	6.89985	7.25493	7.21446	7.08575	7.06243	7.05305
TC0100000660.mm.1	4.4354	4.41102	4.54214	4.58078	4.5086	Asic4	NM_183022	acid-sensing (proton-gated) ion channel family member 4	4.56724	4.36561	4.5105	4.31262	4.42101	4.408	4.42183	4.49125	4.32302	4.40171	4.48191	4.51487	4.77008	4.63624	4.51307	4.684	4.5319	4.5387	4.44575	4.64837	4.5211	4.45255	4.47521
TC0100000661.mm.1	3.36366	3.35915	3.42649	3.43916	3.44971	Tmem198	NM_177056	transmembrane protein 198	3.50783	3.29227	3.42571	3.23865	3.35385	3.40585	3.31641	3.3843	3.33004	3.22188	3.40581	3.41638	3.6619	3.42268	3.41626	3.52358	3.41349	3.41981	3.41665	3.48881	3.58805	3.38422	3.37084
TC0100000662.mm.1	4.84452	4.73275	4.82733	4.9217	4.81813	Inha	NM_010564	inhibin alpha	4.93597	4.80633	4.85721	4.89266	4.73045	4.84842	4.67513	4.64322	4.76425	4.76859	4.85703	4.67492	5.00879	5.13399	4.82527	5.00979	4.93841	4.70107	4.71665	4.90009	4.89077	4.6693	4.91381
TC0100000663.mm.1	4.66072	4.5946	4.59511	4.57976	4.56272	Stk11ip	NM_027886	serine/threonine kinase 11 interacting protein	4.7064	4.74588	4.68543	4.55029	4.61558	4.63222	4.65007	4.60044	4.49567	4.51554	4.54378	4.58027	4.74084	4.58439	4.63754	4.54132	4.5376	4.59795	4.51963	4.68951	4.59253	4.54514	4.46678
TC0100000664.mm.1	2.04002	2.0354	2.05229	2.07163	1.91101	Gm15183	ENSMUST00000118933	predicted gene 15183	2.20196	1.95138	1.94881	2.05493	2.04304	1.92508	1.78667	2.27023	2.1596	2.15341	2.01201	1.93987	2.10388	2.14048	2.12549	2.12814	1.92462	2.03943	1.81128	2.04664	1.98846	1.81845	1.89023
TC0100000665.mm.1	5.20183	5.38182	5.36301	5.35325	5.32161	Slc4a3	NM_009208	solute carrier family 4 (anion exchanger), member 3	5.47763	5.21031	4.98725	5.19342	5.14052	5.35188	5.37467	5.42371	5.37703	5.39232	5.28495	5.33786	5.43692	5.22613	5.45344	5.42571	5.37614	5.28482	5.345	5.49073	5.11046	5.345	5.31688
TC0100000666.mm.1	2.56289	2.61169	2.54871	2.6087	2.54513	Gm15180	ENSMUST00000117745	predicted gene 15180	2.45729	2.77102	2.70905	2.40234	2.47478	2.68313	2.55582	2.57851	2.62931	2.54433	2.60439	2.54141	2.50472	2.64054	2.54951	2.67351	2.52785	2.65209	2.54818	2.71147	2.76831	2.36185	2.33585
TC0100000667.mm.1	1.69126	1.64126	1.69668	1.6424	1.68419	Gm15182	ENSMUST00000120832	predicted gene 15182	1.65487	1.67265	1.77141	1.62323	1.73413	1.70849	1.61716	1.59418	1.64521	1.70258	1.78986	1.65253	1.64177	1.76537	1.59994	1.61935	1.56929	1.65807	1.76814	1.63885	1.78636	1.57256	1.65503
TC0100000668.mm.1	3.72476	3.64953	3.67307	3.73967	3.6487	Gm5257	ENSMUST00000121823	predicted gene 5257	3.69207	3.64602	3.74843	3.68435	3.85296	3.867	3.70704	3.57967	3.4444	3.60952	3.8901	3.47806	3.7146	3.77855	3.78561	3.57861	3.76761	3.788	3.54539	3.80165	3.81653	3.57681	3.50311
TC0100000669.mm.1	6.54075	6.37515	6.38864	6.54393	6.5358	KnowTID_00000087	KnowTID_00000087	NA	6.50074	6.57543	6.67329	6.51964	6.43465	6.49815	6.52902	6.25797	6.21546	6.17988	6.65849	6.42025	6.29594	6.66288	6.47355	6.60532	6.4909	6.48699	6.51536	6.46703	6.57161	6.53686	6.58813
TC0100000670.mm.1	2.45765	2.70455	2.78776	2.73479	2.81298	NONMMUT001608	NONMMUT001608	NA	2.65793	2.42198	2.30412	2.4128	2.49144	2.67206	2.68343	2.79997	2.66273	2.84209	2.85826	2.55274	2.89797	2.51102	2.74143	3.00038	2.77532	2.64579	2.90511	2.88818	2.74617	2.78047	2.74498
TC0100000671.mm.1	2.34397	2.19477	2.29892	2.2595	2.28191	Gm17751	NR_038012	predicted gene, 17751	2.36181	2.29677	2.49883	2.18851	2.37393	2.25834	2.19579	2.14644	2.17851	2.26054	2.35501	2.25165	2.32849	2.41305	2.15574	2.3048	2.22022	2.20369	2.21916	2.25427	2.42816	2.25081	2.25716
TC0100000672.mm.1	1.45281	1.46516	1.44672	1.49262	1.41984	Mir6343	NR_105761	microRNA mir-6343	1.53999	1.40127	1.52431	1.50168	1.29679	1.44433	1.41851	1.55788	1.43991	1.37943	1.5525	1.40772	1.44722	1.48418	1.41806	1.73035	1.45145	1.37905	1.61605	1.41593	1.38522	1.43294	1.24906
TC0100000673.mm.1	1.2695	1.22176	1.22739	1.23691	1.29757	NovelTID_00000052	NovelTID_00000052	NA	1.22691	1.31379	1.15511	1.28025	1.37146	1.29863	1.23168	1.26095	1.09579	1.09067	1.33682	1.14516	1.33691	1.19102	1.06148	1.23287	1.36895	1.33021	1.26821	1.26648	1.25517	1.1764	1.52162
TC0100000674.mm.1	3.59354	3.70294	3.88849	3.70829	3.91107	Gm25974	ENSMUST00000158701	predicted gene, 25974	3.7115	3.51761	3.74392	3.41415	3.58053	3.77079	3.74135	3.64669	3.65293	3.69118	3.88312	3.84103	4.13865	3.81275	3.48155	3.68002	3.89009	3.67704	3.90335	3.87354	3.91881	3.92314	3.93652
TC0100000675.mm.1	3.61168	3.69248	3.65012	3.83105	3.67007	NONMMUT001618	NONMMUT001618	NA	3.71711	3.57198	3.72274	3.3917	3.65488	3.85611	3.63072	3.64875	3.63435	3.46125	3.82166	3.48723	3.83033	4.09834	3.61082	3.80232	3.91645	3.72732	3.43643	3.85455	3.81888	3.7599	3.4806
TC0100000676.mm.1	1.62847	1.66267	1.67217	1.62834	1.52805	NONMMUT001619	NONMMUT001619	NA	1.6524	1.58919	1.64844	1.57219	1.68011	1.60593	1.69626	1.63706	1.71143	1.6062	1.63622	1.58638	1.85987	1.64134	1.66331	1.63339	1.62524	1.57844	1.40721	1.50728	1.51977	1.54445	1.66152
TC0100000677.mm.1	1.07108	1.04432	1.13639	1.07319	1.04566	NONMMUT001621	NONMMUT001621	NA	1.17607	1.03436	1.00836	1.12751	1.00912	1.12969	1.01964	1.05113	0.976818	1.27577	1.01632	1.16841	1.08506	1.12786	1.11928	1.10962	0.971965	1.03723	1.04563	0.918986	1.13842	1.014	1.11126
TC0100000678.mm.1	4.2967	4.01331	4.13884	4.67939	4.67322	Sgpp2	NM_001004173	sphingosine-1-phosphate phosphotase 2	4.15308	4.11753	4.7144	3.97046	4.52806	4.05168	4.01214	4.1042	3.88521	4.07374	3.9969	4.13657	4.34813	4.21651	4.09318	6.94038	4.01939	4.12747	4.01822	4.12794	5.76522	5.30762	4.1471
TC0100000679.mm.1	2.32968	2.37928	2.41669	2.36738	2.40938	NONMMUT001630	NONMMUT001630	NA	2.41222	2.32247	2.35181	2.15211	2.40979	2.573	2.27863	2.44876	2.21673	2.20947	2.38232	2.26661	2.80836	2.48458	2.09556	2.85415	2.19048	2.21211	2.24112	2.56005	2.49851	2.32851	2.41872
TC0100000680.mm.1	2.2999	2.17294	2.37833	2.25836	2.25559	NONMMUT001632	NONMMUT001632	NA	2.32331	2.20246	2.53715	2.28616	2.15043	2.09816	2.23928	2.33547	2.01883	2.26637	2.32034	2.29712	2.62949	2.20166	2.15512	2.18996	2.38978	2.3553	2.05951	2.30806	2.33725	2.23799	2.33512
TC0100000681.mm.1	3.18415	3.28507	3.33318	3.34554	3.48528	Mogat1	NM_026713	monoacylglycerol O-acyltransferase 1	3.25909	3.08798	3.24566	3.2251	3.10291	3.30531	3.34917	3.15496	3.33083	3.29317	3.28986	3.31411	3.43559	3.44813	3.38503	3.33612	3.27943	3.27897	3.50247	3.52394	3.44557	3.33503	3.61937
TC0100000682.mm.1	5.00132	5.12188	5.03058	4.96389	5.06886	Utp14b	NM_001001981	UTP14, U3 small nucleolar ribonucleoprotein, homolog B (yeast)	5.10436	4.78998	5.07821	5.07904	4.95501	4.99899	5.13854	5.00374	5.34627	5.07544	4.94423	5.05176	5.0509	4.85381	4.96178	5.24396	4.91306	4.84686	5.03701	4.84546	5.24496	5.05471	5.16215
TC0100000683.mm.1	3.36966	3.26847	3.19547	3.25139	3.17094	NONMMUT001643	NONMMUT001643	NA	3.40768	3.19615	3.58805	3.41124	3.24519	3.2178	3.39657	3.22148	3.23804	3.03661	3.1898	3.3609	3.19457	3.22504	3.34678	3.11831	3.21604	3.35079	3.05183	3.28778	3.17517	3.08108	3.25884
TC0100000684.mm.1	5.19035	5.77561	5.6756	5.24934	5.57573	Kcne4	NM_021342	potassium voltage-gated channel, Isk-related subfamily, gene 4	5.68777	5.36906	4.81388	5.10763	4.97342	5.48426	5.79649	5.61711	6.20456	5.84088	5.58474	5.74134	5.53544	4.97542	5.67625	4.73776	5.0143	5.84296	5.77503	5.3249	5.6857	5.59995	5.49307
TC0100000685.mm.1	1.18646	1.23125	1.25504	1.16597	1.22916	ENSMUST00000183769	ENSMUST00000183769	ncrna:known chromosome:GRCm38:1:79045608:79045701:1 gene:ENSMUSG00000098911 gene_biotype:miRNA transcript_biotype:miRNA	1.01493	1.21792	1.1634	1.16561	1.37044	1.21525	1.33909	1.19706	1.1736	1.13716	1.33272	1.26205	1.28824	1.16749	1.23985	1.24782	1.13344	1.04123	1.1875	1.26618	1.24917	1.19913	1.24381
TC0100000686.mm.1	1.26263	1.22378	1.28709	1.24812	1.19331	XR_140442	XR_140442	Jackson Lab	1.24609	1.2805	1.23979	1.31025	1.23653	1.29104	1.22023	1.1595	1.22436	1.42198	1.25131	1.28743	1.18764	1.38633	1.32228	1.10016	1.23224	1.1996	1.08575	1.24288	1.15014	1.29421	1.19356
TC0100000687.mm.1	1.98672	1.96867	1.98312	1.83957	1.97471	Gm10555	XR_140443	predicted gene 10555	1.99611	1.91519	1.7707	2.03542	2.2162	1.83199	2.07554	2.01501	1.95215	1.81884	1.99432	2.01538	2.10394	1.96512	1.93518	1.78962	1.67776	1.83019	1.90459	2.22403	1.98431	1.78489	1.97573
TC0100000688.mm.1	4.45127	4.44921	4.5348	4.47616	4.44951	Mrpl44	NM_001081210	mitochondrial ribosomal protein L44	4.56476	4.47105	4.39609	4.46453	4.35991	4.51057	4.38656	4.43166	4.46804	4.75566	4.44181	4.5531	4.38862	4.44667	4.42425	4.45436	4.35863	4.69689	4.37217	4.51839	4.35553	4.41711	4.58438
TC0100000689.mm.1	1.41528	1.48823	1.48231	1.48441	1.49629	NONMMUT001650	NONMMUT001650	NA	1.58599	1.28032	1.43039	1.3377	1.44202	1.38051	1.50495	1.32785	1.7396	1.37484	1.64492	1.46704	1.44244	1.39535	1.38815	1.59913	1.60595	1.43344	1.4708	1.53108	1.64906	1.34231	1.48822
TC0100000690.mm.1	6.97562	7.10041	7.2381	7.09157	6.78412	XR_140444	XR_140444	Jackson Lab	7.33834	7.0545	6.14601	7.07053	7.2687	7.09989	6.86591	7.11637	7.31945	7.23506	7.19395	7.54586	6.97754	7.15012	7.2441	7.11782	7.1378	6.80801	7.14445	6.96126	6.32326	6.85422	6.63741
TC0100000691.mm.1	9.61526	9.65845	9.6889	9.57914	9.8009	Gm23934	ENSMUST00000179111	predicted gene, 23934	9.54784	9.54363	9.86501	9.50023	9.61956	9.60801	9.67696	9.75115	9.59768	9.64897	9.75224	9.65943	9.69494	9.32603	9.48231	9.6408	9.73782	9.70873	9.63281	9.67909	10.0694	9.72005	9.90314
TC0100000692.mm.1	2.24257	2.20739	2.16945	2.26572	2.13971	KnowTID_00000090	KnowTID_00000090	NA	2.17412	2.08481	2.23003	2.35943	2.36446	2.30105	2.2397	2.17667	2.11216	2.01123	2.34071	2.1895	2.13636	2.38192	2.24352	2.02793	2.27338	2.40187	2.21047	1.80875	2.22435	2.24419	2.21077
TC0100000693.mm.1	1.77063	1.71698	1.84484	1.78182	1.80643	KnowTID_00000091	KnowTID_00000091	NA	1.84483	1.62189	1.80537	1.77376	1.80731	1.71688	1.70477	1.69037	1.75592	1.79288	1.67977	1.99245	1.91427	1.83699	1.8271	1.78419	1.75367	1.70713	1.70957	2.0254	1.59272	1.93127	1.77318
TC0100000694.mm.1	1.20932	1.28969	1.26551	1.29206	1.29414	KnowTID_00000092	KnowTID_00000092	NA	1.09844	1.17589	1.25677	1.35873	1.1568	1.1757	1.33413	1.36173	1.28721	1.26812	1.24302	1.09834	1.45255	1.22821	1.40338	1.2818	1.31104	1.23586	1.43079	1.35161	1.25511	1.32071	1.11248
TC0100000695.mm.1	1.27927	1.33145	1.3904	1.27003	1.3087	NONMMUT001665	NONMMUT001665	NA	1.42661	1.12724	1.31756	1.21752	1.3074	1.38815	1.28709	1.28166	1.3689	1.22508	1.37424	1.43549	1.5268	1.2927	1.38317	1.07365	1.24368	1.35693	1.324	1.29238	1.33981	1.33128	1.25603
TC0100000696.mm.1	1.66579	1.80913	1.78409	1.68925	1.73491	1700016L21Rik	NR_040460	RIKEN cDNA 1700016L21 gene	1.80001	1.78088	1.54414	1.6571	1.5468	1.73075	1.65757	1.86708	1.98112	1.67456	1.80582	1.89232	1.76366	1.83583	1.79123	1.73523	1.56221	1.52177	1.81626	1.7724	1.70898	1.70591	1.67102
TC0100000697.mm.1	1.98782	1.94535	1.99786	2.2029	2.1086	Nyap2	NM_172849	neuronal tyrosine-phophorylated phosphoinositide 3-kinase adaptor 2	1.99412	1.9622	2.08018	1.93918	1.9634	1.9903	1.94237	2.01438	1.83435	1.97345	2.02304	1.93663	2.05833	1.9927	1.97345	3.13557	1.90255	2.01023	1.91126	2.00443	2.38228	2.30303	1.94203
TC0100000698.mm.1	1.46461	1.29122	1.34292	1.41991	1.45261	NONMMUT001681	NONMMUT001681	NA	1.31912	1.23108	1.51059	1.67292	1.58934	1.31077	1.37382	1.33711	1.14318	1.34128	1.3615	1.29581	1.37309	1.33234	1.41319	1.84586	1.23623	1.27192	1.09134	1.52	1.68104	1.49984	1.47084
TC0100000699.mm.1	1.50556	1.46848	1.44572	1.51077	1.44702	NONMMUT001682	NONMMUT001682	NA	1.52556	1.42766	1.63323	1.46884	1.47249	1.49087	1.52993	1.35294	1.50017	1.3732	1.46529	1.5312	1.41318	1.44146	1.40074	1.80212	1.53189	1.37761	1.33965	1.59453	1.45753	1.51187	1.33155
TC0100000700.mm.1	1.84097	1.76919	1.86649	1.79626	1.77921	KnowTID_00000094	KnowTID_00000094	NA	1.7535	1.62949	1.68184	2.03829	2.10174	1.84947	1.6234	1.90379	1.7001	1.74109	1.73973	1.92659	2.05854	1.88221	1.82397	1.60632	1.78781	1.88101	1.84734	1.83061	1.63357	1.83513	1.74941
TC0100000701.mm.1	4.56345	4.56071	4.65378	4.4701	4.64407	Mir6344	NR_105762	microRNA mir-6344	4.63793	4.33975	4.91946	4.5788	4.34129	4.68536	4.61666	4.77796	4.16285	4.57749	4.878	4.34099	4.81863	4.59595	4.33531	4.4934	4.47814	4.44768	4.64647	4.65356	4.56655	4.60881	4.74495
TC0100000702.mm.1	2.27044	2.34582	2.33306	2.36746	2.40508	Gm9747	ENSMUST00000023262	predicted gene 9747	2.36789	2.17401	1.88672	2.42951	2.49408	2.18925	2.29458	2.38785	2.5116	2.56221	2.29064	2.2864	2.193	2.57752	2.22751	2.27758	2.31073	2.44395	2.43334	2.31757	2.39223	2.31572	2.56654
TC0100000703.mm.1	6.48335	6.62875	6.59857	6.55098	6.49484	Rhbdd1	NM_001122685	rhomboid domain containing 1	6.64264	6.50174	6.40917	6.45819	6.40501	6.65216	6.54924	6.67301	6.64059	6.72702	6.44841	6.62321	6.59562	6.51881	6.66096	6.59018	6.64645	6.3385	6.65675	6.58009	6.32461	6.52361	6.38912
TC0100000704.mm.1	2.21179	2.17683	2.15605	2.22561	2.17013	Gm19552	XR_140446	predicted gene, 19552	2.30332	2.13884	2.2529	2.12139	2.2425	2.43465	2.08761	1.98334	2.20172	2.43527	2.13223	2.09489	1.9618	2.14913	2.28464	2.35208	2.16909	2.17312	2.13751	2.17959	2.08083	2.30163	2.15108
TC0100000705.mm.1	1.69418	1.70366	1.67497	1.71855	1.74189	NONMMUT001692	NONMMUT001692	NA	1.66693	1.45745	1.77959	1.81762	1.74931	1.59662	1.70028	1.76689	1.75086	1.61908	1.66512	1.68147	1.7342	1.77439	1.69585	1.67135	1.97463	1.47655	1.69973	1.79095	1.67784	1.94978	1.59113
TC0100000706.mm.1	4.80537	4.86393	5.07168	5.00619	4.88777	Col4a3	NM_007734	collagen, type IV, alpha 3	5.08934	4.69471	4.6928	4.763	4.787	4.90469	4.79842	4.91309	4.8395	5.09803	5.09381	5.01356	5.08131	4.98425	5.14348	5.0373	5.01206	4.85386	4.88441	4.91852	4.81639	4.93339	4.88614
TC0100000707.mm.1	5.7833	5.68584	5.7715	5.7975	5.81577	n-R5s213	ENSMUST00000083121	nuclear encoded rRNA 5S 213	5.80033	5.78716	5.91953	5.63324	5.77626	5.71924	5.76378	5.75144	5.50892	5.64781	5.79672	5.81977	5.82168	5.61911	5.68628	5.85414	5.88512	5.94286	5.69786	5.81589	5.88694	5.84186	5.8363
TC0100000708.mm.1	6.7151	6.70957	6.65173	6.67677	6.71276	Mff	NM_029409	mitochondrial fission factor	6.67662	6.63176	6.86754	6.69281	6.70675	6.70495	6.73164	6.7182	6.68347	6.68904	6.65522	6.65735	6.6053	6.64016	6.67513	6.71924	6.69189	6.65743	6.75782	6.59873	6.80866	6.69334	6.70522
TC0100000709.mm.1	3.60304	3.64908	3.6283	3.57459	3.66911	NONMMUT001700	NONMMUT001700	NA	3.35706	3.63396	3.3788	3.72902	3.91637	3.48053	3.62843	3.49175	3.9956	3.8607	3.65414	3.66737	3.33098	3.81125	3.91096	3.42053	3.28741	3.44281	3.76652	3.63539	3.581	3.58207	3.78059
TC0100000710.mm.1	2.85566	2.82278	2.85174	2.9262	2.78666	NONMMUT001703	NONMMUT001703	NA	3.04739	2.80477	2.83557	2.70033	2.89026	2.67184	2.98535	2.81223	2.82168	2.70447	2.92759	2.71282	3.06208	3.05002	2.89891	2.85021	2.95112	2.88073	2.73908	2.96289	2.7529	2.73186	2.74656
TC0100000711.mm.1	8.3631	8.49367	8.31572	8.30923	8.27708	Agfg1	NM_010472	ArfGAP with FG repeats 1	8.40339	8.32034	8.20364	8.43134	8.45677	8.40881	8.49469	8.42761	8.64359	8.37416	8.26469	8.29665	8.3274	8.37289	8.27174	8.1896	8.23037	8.48153	8.36013	8.27919	8.19893	8.28584	8.2613
TC0100000712.mm.1	5.20041	5.20448	5.12507	5.13313	4.87074	NONMMUT001706	NONMMUT001706	NA	5.18741	4.96895	4.8458	5.47826	5.52165	4.94946	5.28364	5.22437	5.36042	5.15222	5.26331	5.10559	4.97918	5.26906	5.19049	5.10274	5.04766	5.05568	4.99756	4.75474	4.64479	4.85336	5.10324
TC0100000713.mm.1	2.86843	2.73001	2.69128	2.82777	2.73068	KnowTID_00000095	KnowTID_00000095	NA	2.89108	2.85475	2.67745	2.75286	3.16602	2.62155	2.79802	2.76362	2.73684	2.70049	2.78297	2.49373	2.78791	3.01247	2.91885	2.90479	2.62863	2.67411	2.75738	2.63148	2.78993	2.76193	2.71269
TC0100000714.mm.1	2.08788	2.02264	2.10642	2.01457	2.00027	KnowTID_00000096	KnowTID_00000096	NA	2.00575	2.06808	2.02901	2.20462	2.13191	2.0379	1.93366	2.03111	2.08791	1.87924	2.18076	2.13215	2.23353	1.93993	2.11436	2.11737	2.10055	1.80063	1.94269	2.04775	2.03457	1.91894	2.05742
TC0100000715.mm.1	1.76199	1.70245	1.67605	1.79821	1.71205	KnowTID_00000097	KnowTID_00000097	NA	1.89924	1.61767	1.72863	1.71096	1.85346	1.66182	1.8884	1.81745	1.44214	1.67951	1.70505	1.53788	1.78175	1.84244	1.79705	1.64995	1.89858	1.80301	1.77562	1.88293	1.65967	1.62287	1.61917
TC0100000716.mm.1	2.28459	2.22122	2.42761	2.23303	2.24559	KnowTID_00000098	KnowTID_00000098	NA	2.26014	2.13887	2.38619	2.48693	2.15083	2.3127	2.25825	2.06968	2.24425	2.28094	2.45477	2.30131	2.67343	2.38669	2.19364	2.14136	2.3336	2.10986	2.06652	2.46337	2.25812	2.26466	2.17528
TC0100000717.mm.1	1.32818	1.32726	1.33374	1.37182	1.31155	Krtap28-13	XM_896507	keratin associated protein 28-13	1.28389	1.3873	1.41293	1.29185	1.2649	1.28874	1.47538	1.26413	1.28078	1.31132	1.38799	1.25071	1.38494	1.20097	1.49061	1.22217	1.39617	1.54919	1.1624	1.33046	1.30566	1.53423	1.22498
TC0100000718.mm.1	2.08008	1.94666	2.03374	2.01047	2.04189	Ccl20	NM_001159738	chemokine (C-C motif) ligand 20	1.994	2.02611	2.19351	2.15364	2.03312	1.95118	1.95147	2.01145	1.87253	1.99903	2.04867	2.04933	2.03794	2.08788	1.92277	2.03671	2.00493	2.00007	1.89002	1.99583	2.16017	2.15242	2.01101
TC0100000719.mm.1	1.55554	1.57748	1.61512	1.65924	1.62866	Daw1	NM_027725	dynein assembly factor with WDR repeat domains 1	1.60827	1.57417	1.58747	1.43719	1.57061	1.50509	1.65315	1.54246	1.60924	1.55271	1.65437	1.60301	1.65037	1.611	1.75633	1.54988	1.69055	1.68846	1.61541	1.77179	1.70302	1.56138	1.49169
TC0100000720.mm.1	2.51931	2.63098	2.78385	2.7012	2.65515	NONMMUT001720	NONMMUT001720	NA	2.69085	2.28375	2.53923	2.62936	2.45336	2.58926	2.66815	2.67915	2.58737	2.59867	2.75532	2.73449	3.04693	2.74422	2.92627	2.58643	2.51009	2.73901	2.48685	2.65949	2.81309	2.76763	2.54869
TC0100000721.mm.1	6.5798	6.65517	6.44381	6.55898	6.64284	Gm6374	ENSMUST00000110799	predicted gene 6374	6.58707	6.31892	6.60326	6.76207	6.62767	6.66167	6.65325	6.75375	6.55202	6.61321	6.43615	6.54503	6.18086	6.48341	6.65234	6.53998	6.54725	6.5719	6.67385	6.47511	6.73711	6.7112	6.61692
TC0100000722.mm.1	10.5084	10.4575	10.3971	10.462	10.4447	Gm25754	ENSMUST00000178653	predicted gene, 25754	10.3254	10.5728	10.5015	10.5729	10.5694	10.3284	10.5686	10.4913	10.4415	10.2977	10.5695	10.331	10.3901	10.5797	10.4796	10.4461	10.397	10.4078	10.4406	10.4411	10.4088	10.4018	10.531
TC0100000723.mm.1	4.84676	4.77659	4.91584	4.81093	4.92727	Gm24555	ENSMUST00000104548	predicted gene, 24555	4.86905	4.72841	4.96513	4.92585	4.74534	4.75933	4.82374	4.89858	4.6247	4.90168	5.0324	4.82422	4.90507	4.82026	4.81325	4.74029	4.93365	4.74721	4.87277	4.85925	5.16385	4.79205	4.94844
TC0100000724.mm.1	5.988	5.85342	5.99604	5.93334	5.91308	Mir5126	NR_039588	microRNA 5126	5.83597	5.89757	6.10039	5.95776	6.1483	5.6474	5.8902	5.92928	5.94679	5.93034	5.9303	5.89557	6.22794	5.95337	5.91126	5.85452	5.86692	6.08064	5.69972	6.14065	5.94509	5.94723	5.83269
TC0100000725.mm.1	4.70693	4.68615	4.67565	4.67323	4.77813	Fbxo36	NM_025386	F-box protein 36	4.69151	4.71131	4.71053	4.70754	4.71378	4.75965	4.5568	4.7221	4.70606	4.78332	4.56564	4.6967	4.65692	4.75644	4.71761	4.71824	4.7593	4.41456	4.69081	4.74851	4.82506	4.79537	4.83091
TC0100000726.mm.1	4.05939	4.08838	3.94023	3.90169	4.06133	Gm15433	XM_003084455	predicted pseudogene 15433	3.76673	4.17362	4.29971	3.97702	4.07989	3.93822	4.60565	3.6374	4.17224	3.83024	4.0232	3.63243	4.27504	3.7472	3.68514	3.62262	4.082	4.3715	3.87852	3.77873	4.65171	4.09831	3.89937
TC0100000727.mm.1	4.60154	4.6218	4.35894	4.49105	4.66586	Csprs	uc007bte.1	component of Sp100-rs	4.04696	4.62541	5.18475	4.30333	4.84723	4.70395	4.9488	3.98176	4.85271	4.32144	4.49343	4.12335	4.49754	4.4703	4.22136	4.27229	4.63217	4.85913	4.39354	4.54659	5.40134	4.41298	4.57486
TC0100000728.mm.1	3.75736	3.62543	3.62249	3.55472	3.7365	AB346773	uc029qpo.1	NA	3.24182	3.41978	3.93943	3.74706	4.4387	3.44552	4.4324	3.20497	3.41883	3.34944	3.94508	3.3205	3.87491	3.60695	3.51782	3.41161	3.58775	3.64944	3.52736	3.68792	4.31883	3.30808	3.8403
TC0100000729.mm.1	2.67027	2.46424	2.27847	2.42071	2.52474	AB346812	uc029qpr.1	NA	2.40888	2.7316	2.92668	2.45399	2.8302	2.13807	3.25355	2.11623	2.3491	2.03858	2.25575	2.23299	2.58659	2.39675	2.20843	2.82386	2.39206	2.28248	2.4353	2.66298	3.0783	1.92309	2.52406
TC0100000730.mm.1	3.6702	3.668	3.2786	3.42757	3.77074	AB346777	uc029qpu.1	NA	3.19523	3.43869	4.49109	3.51978	3.70621	3.45629	4.1714	3.60713	3.43721	2.67849	3.908	3.2213	3.30661	3.09438	3.71513	3.16077	3.68276	3.4848	3.64165	3.42389	4.5261	3.29445	3.9676
TC0100000734.mm.1	9.50666	9.43297	9.3567	9.47277	9.43738	Rpl19-ps1	ENSMUST00000121059	ribosomal protein L19, pseudogene 1	9.42713	9.54804	9.65536	9.39696	9.5058	9.54934	9.33133	9.4695	9.38171	9.43214	9.29796	9.32769	9.369	9.43709	9.40176	9.36286	9.55534	9.6068	9.3866	9.50015	9.46324	9.44301	9.39389
TC0100000735.mm.1	6.78703	6.5411	6.70632	6.67029	6.49611	Gm2389	ENSMUST00000160487	predicted pseudogene 2389	6.64224	6.75446	6.92282	6.80668	6.80894	6.55998	6.51869	6.53075	6.55496	6.78073	6.6861	6.78028	6.57817	6.92204	6.56523	6.60425	6.6485	6.61144	6.73428	6.53961	6.40219	6.49878	6.3057
TC0100000736.mm.1	3.08724	2.97313	3.03595	3.12289	3.07726	Gm10553	ENSMUST00000097669	predicted gene 10553	3.01889	3.2255	3.22381	3.09986	2.86813	2.8921	3.16817	2.82253	3.00973	2.95215	3.02951	3.00797	3.15419	3.14717	3.07283	2.9473	3.24649	3.20064	3.05499	3.13381	3.02078	2.95703	3.21968
TC0100000738.mm.1	1.56819	1.59093	1.54076	1.59759	1.55293	Gm16038	ENSMUST00000159317	predicted gene 16038	1.61491	1.67111	1.59637	1.5002	1.45837	1.67787	1.48678	1.60362	1.59543	1.59994	1.46094	1.49172	1.61046	1.47541	1.80547	1.58509	1.57832	1.54369	1.65018	1.45146	1.62699	1.52763	1.50837
TC0100000739.mm.1	3.6702	3.668	3.2786	3.42757	3.77074	AB346777	uc029qqa.1	NA	3.19523	3.43869	4.49109	3.51978	3.70621	3.45629	4.1714	3.60713	3.43721	2.67849	3.908	3.2213	3.30661	3.09438	3.71513	3.16077	3.68276	3.4848	3.64165	3.42389	4.5261	3.29445	3.9676
TC0100000741.mm.1	1.71013	1.55426	1.37488	1.61085	1.66689	AB346741	uc029qqd.1	NA	1.33388	0.991329	1.83854	2.00079	2.3861	1.33388	1.93853	1.33298	1.61166	1.33388	1.27526	1.27859	1.61181	1.68437	1.88166	1.25726	1.93096	1.3	2.2659	1.58366	1.57356	1.39866	1.51269
TC0100000742.mm.1	5.2272	5.09491	5.16404	5.14117	5.0393	Gm6264	ENSMUST00000160802	predicted gene 6264	5.10078	5.233	5.3314	5.16857	5.30227	5.05337	5.14084	5.0766	5.10883	5.22758	5.12466	5.16627	5.13765	5.18852	5.11755	5.01692	5.15569	5.22719	5.14827	5.06696	4.98297	5.03482	4.9635
TC0100000743.mm.1	4.61102	4.6339	4.56298	4.6063	4.66965	Gm7609	NM_001081746	predicted pseudogene 7609	4.41179	4.74158	4.86463	4.47555	4.56153	4.60122	4.9686	4.32644	4.63935	4.49688	4.62686	4.37303	4.75515	4.54313	4.4647	4.45735	4.6796	4.88673	4.56837	4.49752	5.05591	4.59429	4.63218
TC0100000744.mm.1	3.87377	4.14453	3.80084	3.75925	3.87292	Csprs	uc007bts.1	component of Sp100-rs	3.51546	3.90105	4.54632	3.4956	3.91044	4.11528	4.47604	3.7629	4.2239	3.76717	3.79064	3.53633	4.10921	3.23851	3.48247	3.66856	4.17503	4.23168	3.69869	3.4776	4.61616	3.73373	3.83843
TC0100000745.mm.1	3.75736	3.62543	3.62249	3.55472	3.7365	AB346773	uc029qqg.1	NA	3.24182	3.41978	3.93943	3.74706	4.4387	3.44552	4.4324	3.20497	3.41883	3.34944	3.94508	3.3205	3.87491	3.60695	3.51782	3.41161	3.58775	3.64944	3.52736	3.68792	4.31883	3.30808	3.8403
TC0100000746.mm.1	2.67027	2.46424	2.27847	2.42071	2.52474	AB346812	uc029qqj.1	NA	2.40888	2.7316	2.92668	2.45399	2.8302	2.13807	3.25355	2.11623	2.3491	2.03858	2.25575	2.23299	2.58659	2.39675	2.20843	2.82386	2.39206	2.28248	2.4353	2.66298	3.0783	1.92309	2.52406
TC0100000747.mm.1	3.24749	3.13666	3.21495	3.20012	3.22898	Gm16028	ENSMUST00000162347	predicted gene 16028	3.07436	3.33298	3.29882	3.14598	3.38528	3.06893	3.21497	3.05374	3.20902	3.24609	3.27311	3.1441	3.19652	3.32515	3.35376	3.06475	2.9495	3.30744	3.11747	3.23339	3.4833	3.22631	3.08444
TC0100000748.mm.1	3.6702	3.668	3.2786	3.42757	3.77074	AB346777	uc029qqm.1	NA	3.19523	3.43869	4.49109	3.51978	3.70621	3.45629	4.1714	3.60713	3.43721	2.67849	3.908	3.2213	3.30661	3.09438	3.71513	3.16077	3.68276	3.4848	3.64165	3.42389	4.5261	3.29445	3.9676
TC0100000750.mm.1	1.73888	1.56678	1.32132	1.67018	1.78396	AB346742	uc029qqp.1	NA	1.39223	0.946819	1.79403	1.84329	2.71802	1.19143	1.82861	1.31653	1.93055	1.30768	1.0642	1.24847	1.66494	1.7187	1.78793	1.38983	2.18731	1.26714	2.41155	1.4899	1.80675	1.29379	1.91784
TC0100000752.mm.1	2.40573	2.37479	2.44159	2.42417	2.3874	Gm16025	ENSMUST00000161282	predicted gene 16025	2.44547	2.44877	2.28635	2.47628	2.3718	2.21095	2.49833	2.4079	2.382	2.55729	2.42544	2.3015	2.48211	2.57807	2.3419	2.42611	2.3951	2.37964	2.40139	2.44138	2.41078	2.22161	2.46181
TC0100000753.mm.1	3.6702	3.668	3.2786	3.42757	3.77074	AB346777	uc029qqs.1	NA	3.19523	3.43869	4.49109	3.51978	3.70621	3.45629	4.1714	3.60713	3.43721	2.67849	3.908	3.2213	3.30661	3.09438	3.71513	3.16077	3.68276	3.4848	3.64165	3.42389	4.5261	3.29445	3.9676
TC0100000755.mm.1	1.71013	1.55426	1.37488	1.61085	1.66689	AB346741	uc029qqv.1	NA	1.33388	0.991329	1.83854	2.00079	2.3861	1.33388	1.93853	1.33298	1.61166	1.33388	1.27526	1.27859	1.61181	1.68437	1.88166	1.25726	1.93096	1.3	2.2659	1.58366	1.57356	1.39866	1.51269
TC0100000757.mm.1	6.70111	6.50213	6.60195	6.56903	6.39941	Gm2427	XM_001473524	predicted gene 2427	6.56311	6.66178	6.79149	6.73302	6.75614	6.46344	6.53559	6.47955	6.52993	6.71911	6.54789	6.70906	6.43173	6.79373	6.50991	6.41627	6.54427	6.58094	6.60589	6.4274	6.31921	6.40537	6.23918
TC0100000758.mm.1	5.02619	5.06339	4.96367	4.95564	5.07465	Gm7592	ENSMUST00000159601	predicted gene 7592	4.91929	5.10006	5.41557	4.80722	4.88881	5.09239	5.23224	4.83848	5.09043	4.90388	4.98645	4.81747	5.14687	4.90791	4.80348	4.79415	5.04531	5.22736	4.86475	4.97389	5.48862	5.0121	5.0339
TC0100000759.mm.1	3.75736	3.62543	3.62249	3.55472	3.7365	AB346773	uc029qra.1	NA	3.24182	3.41978	3.93943	3.74706	4.4387	3.44552	4.4324	3.20497	3.41883	3.34944	3.94508	3.3205	3.87491	3.60695	3.51782	3.41161	3.58775	3.64944	3.52736	3.68792	4.31883	3.30808	3.8403
TC0100000760.mm.1	5.2434	5.20634	5.13047	5.20612	5.39112	AB346797	uc029qrd.1	NA	5.41662	5.24051	5.29375	5.02666	5.23948	5.16709	5.4589	5.19807	5.00129	4.87057	5.25508	5.03821	5.35804	5.31663	4.96587	5.16521	5.30789	5.27501	5.36766	5.51808	5.71829	5.06537	5.28619
TC0100000761.mm.1	3.19755	3.2431	3.09276	3.19833	3.16926	G530012D18Rik	ENSMUST00000178024	RIKEN cDNA G530012D1 gene	3.01076	3.16119	3.46645	3.09765	3.2517	3.27322	3.07959	3.34876	3.27083	3.01653	2.93033	3.11071	3.31345	3.27742	3.30432	3.06275	3.2008	3.14633	3.27168	3.14621	2.86359	3.36989	3.19492
TC0100000762.mm.1	2.02274	1.95059	2.0669	1.98758	2.01544	NONMMUT001784	NONMMUT001784	NA	1.88162	1.98267	2.10748	2.01959	2.12233	2.00599	1.95034	2.07395	1.77209	1.93578	2.13148	2.04128	2.15906	2.05917	1.96894	1.82965	2.18055	1.89959	2.02909	2.15121	1.93282	2.04457	1.91954
TC0100000763.mm.1	1.7974	1.73284	1.70244	1.67774	1.78076	NONMMUT001786	NONMMUT001786	NA	1.75662	1.65433	1.81906	1.85644	1.90056	1.78128	1.69402	1.74721	1.70886	1.5812	1.72572	1.63365	1.86919	1.81337	1.59144	1.60923	1.68052	1.69414	1.78902	1.83531	1.85057	1.71258	1.71634
TC0100000764.mm.1	2.76885	2.42829	2.36111	2.37469	2.51721	Gm16094	ENSMUST00000162784	predicted gene 16094	2.20289	2.8843	3.71225	2.32918	2.71561	2.35101	2.60154	2.03393	2.72667	1.99264	2.42413	2.52324	2.50442	2.36902	2.07534	2.0451	2.49415	2.88983	2.31529	2.47225	2.77678	2.57095	2.45078
TC0100000765.mm.1	6.62576	6.42562	6.50031	6.48594	6.38253	Sp140	NM_001013817	Sp140 nuclear body protein	6.46911	6.60107	6.82128	6.59229	6.64504	6.43314	6.47771	6.40257	6.38905	6.52806	6.447	6.521	6.50518	6.56508	6.42715	6.29864	6.57166	6.56719	6.4968	6.35387	6.37245	6.42889	6.26065
TC0100000766.mm.1	6.44888	6.40512	6.34611	6.31719	6.40639	Sp100	NM_013673	nuclear antigen Sp100	6.43579	6.51661	6.9335	6.09539	6.26309	6.38739	6.55371	6.33678	6.34259	6.3236	6.42944	6.2745	6.3569	6.37571	6.21926	6.0167	6.4473	6.52695	6.34016	6.0761	6.89627	6.36639	6.35304
TC0100000767.mm.1	1.84493	1.84946	1.97135	2.03997	2.10116	Mir8096	NR_106172	microRNA mir-8096	1.71644	1.65192	2.22533	1.8207	1.81027	1.95232	1.62296	2.02441	1.79815	1.83277	1.95631	1.90355	2.19275	2.25172	1.8981	2.01552	2.08282	1.9517	2.00643	2.32853	1.81234	2.09675	2.26175
TC0100000768.mm.1	10.7572	10.692	10.6552	10.7805	10.6994	Gm25472	ENSMUST00000175454	predicted gene, 25472	10.6517	10.826	10.7395	10.8012	10.7676	10.6369	10.7681	10.6649	10.6981	10.653	10.7299	10.6519	10.5858	10.8789	10.7701	10.7775	10.7397	10.7363	10.6444	10.7373	10.7342	10.6567	10.7242
TC0100000769.mm.1	2.29645	2.34023	2.45003	2.36845	2.36103	9930111H07Rik	NR_108086	RIKEN cDNA 9930111H07 gene	2.24663	2.30603	2.35294	2.37574	2.20089	2.24176	2.2414	2.60929	2.26848	2.62959	2.36813	2.43732	2.36507	2.44771	2.25646	2.45362	2.37071	2.31377	2.40659	2.49111	2.40976	2.36367	2.134
TC0100000770.mm.1	6.53709	6.48885	6.48137	6.58543	6.50096	Gm22906	ENSMUST00000175191	predicted gene, 22906	6.50202	6.60873	6.46223	6.60464	6.50785	6.55932	6.48992	6.50388	6.40229	6.44832	6.62349	6.4759	6.37778	6.67193	6.58145	6.60227	6.53741	6.53411	6.45461	6.47983	6.45997	6.48309	6.62729
TC0100000771.mm.1	8.00927	7.95471	8.07161	7.99016	7.94613	Cab39	NM_133781	calcium binding protein 39	8.1029	7.94455	7.98165	8.04841	7.96886	7.94425	7.92973	7.95622	7.98866	8.07314	8.06504	8.12552	8.02272	8.06859	7.9649	7.97565	7.99079	7.95088	8.08367	7.87228	7.84945	8.01532	7.90993
TC0100000772.mm.1	3.7952	3.83781	3.86445	3.57212	3.71413	NONMMUT001807	NONMMUT001807	NA	3.46554	3.93865	3.66335	3.98784	3.92062	3.48535	4.00593	3.71522	4.14474	3.78436	3.87556	3.85704	3.94082	3.47588	3.71062	3.61203	3.50223	3.55985	3.68401	3.73857	3.4549	3.72288	3.9703
TC0100000773.mm.1	2.53852	2.5859	2.33483	2.23006	2.27502	NONMMUT001809	NONMMUT001809	NA	2.20056	2.60236	2.4082	2.74438	2.73711	2.3646	2.61889	2.56178	2.79834	2.19572	2.22594	2.24608	2.67158	2.19548	2.10473	1.89552	2.32355	2.63103	2.20304	2.13452	2.29577	2.34918	2.39258
TC0100000774.mm.1	7.59685	7.66608	7.62164	7.61901	7.6562	Itm2c	NM_022417	integral membrane protein 2C	7.67843	7.74807	7.66904	7.37778	7.51093	7.75798	7.58635	7.66926	7.65073	7.64583	7.52507	7.60136	7.71431	7.32533	7.70879	7.72706	7.68033	7.65355	7.68401	7.78099	7.6996	7.63845	7.47794
TC0100000775.mm.1	2.13532	2.15744	2.195	2.18397	2.17638	4933407L21Rik	NR_037692	RIKEN cDNA 4933407L21 gene	2.15785	2.17702	2.16692	2.02816	2.14667	2.15342	2.1886	2.24226	2.04546	2.03952	2.2295	2.15628	2.35471	2.19043	2.21867	2.18394	2.10463	2.22216	2.11533	2.34514	2.19657	2.0378	2.18706
TC0100000776.mm.1	2.67623	2.6967	2.86901	2.74209	2.70539	NONMMUT001818	NONMMUT001818	NA	2.74368	2.65991	2.53907	2.51152	2.92697	2.87696	2.66441	2.69549	2.54992	2.8935	2.85173	2.80196	2.92883	2.75776	2.72575	2.91859	2.523	2.78533	2.62236	2.80301	2.54358	2.80864	2.74935
TC0100000777.mm.1	1.86248	1.83971	1.88896	1.88726	1.85978	Spata3	NM_001122732	spermatogenesis associated 3	1.94108	1.82124	1.93833	1.73633	1.87544	1.85489	1.80635	1.89422	1.80337	1.83129	1.86602	1.8389	2.01965	1.94945	1.81985	1.80881	1.98613	1.87207	1.735	1.99554	1.85487	1.83523	1.87828
TC0100000778.mm.1	5.46012	5.45876	5.60877	5.55589	5.59755	2810459M11Rik	NM_001144992	RIKEN cDNA 2810459M11 gene	5.64387	5.38999	5.50331	5.33751	5.42595	5.47267	5.52389	5.50086	5.33761	5.39305	5.61511	5.50426	5.92268	5.57881	5.48878	5.56208	5.59353	5.55628	5.46943	5.89322	5.50846	5.52911	5.58753
TC0100000780.mm.1	5.34716	5.15312	5.18035	5.32006	5.33452	Gm22786	ENSMUST00000104086	predicted gene, 22786	5.21754	5.17765	5.70319	5.27126	5.36616	5.27293	5.21293	5.21687	4.90977	5.12839	5.31285	5.10591	5.17425	5.22872	5.24669	5.32526	5.43314	5.36646	5.35208	5.29465	5.562	5.25127	5.2126
TC0100000781.mm.1	3.91344	3.97896	3.68055	3.74409	3.83516	NONMMUT001825	NONMMUT001825	NA	3.54883	4.2152	4.21623	4.01049	3.57644	3.73175	3.94711	3.98465	4.25231	3.41083	3.59996	3.87058	3.84083	3.64415	4.07334	3.74112	3.71021	3.55162	3.85632	3.91372	3.67183	3.82282	3.91112
TC0100000782.mm.1	2.87523	2.98956	2.86035	2.90065	2.81263	NONMMUT001828	NONMMUT001828	NA	2.95574	2.95847	2.63869	2.87493	2.94832	2.85668	2.83738	3.02498	3.23918	2.82565	2.74331	2.87335	2.99907	2.88138	2.7947	2.88323	2.93956	3.00441	2.72868	3.07976	2.85816	2.54844	2.84811
TC0100000783.mm.1	4.77209	4.71922	4.67627	4.78055	4.73116	B3gnt7	NM_145222	UDP-GlcNAc:betaGal beta-1,3-N-acetylglucosaminyltransferase 7	4.69136	4.82822	4.95745	4.56516	4.81824	4.93224	4.54784	4.67716	4.71964	4.56763	4.57999	4.69719	4.86027	4.7662	4.68239	4.66266	4.87241	4.91906	4.54791	5.00426	4.73417	4.91403	4.45542
TC0100000784.mm.1	3.44833	3.31643	3.49821	3.52683	3.5324	NONMMUT001832	NONMMUT001832	NA	3.48502	3.45773	3.44298	3.46893	3.38699	3.58219	3.17362	3.45541	3.05451	3.55672	3.40548	3.33054	3.70009	3.8747	3.44027	3.59035	3.45101	3.27781	3.2	4.05015	3.38711	3.51581	3.50891
TC0100000785.mm.1	2.96092	2.80458	3.02407	3.04445	2.96942	Gm5258	XM_357111	predicted gene 5258	3.05463	2.89373	3.00376	2.86163	2.99086	2.89562	2.83061	2.8438	2.64831	3.02311	2.9889	2.93161	3.15266	3.08708	2.84105	3.08282	3.14743	3.06384	2.80502	3.14478	3.1884	2.83956	2.86932
TC0100000786.mm.1	2.89116	2.86973	2.93343	2.91202	2.94039	C130036L24Rik	NR_015507	RIKEN cDNA C130036L24 gene	3.00954	2.91742	2.78082	2.91351	2.8345	2.86245	2.89632	2.86297	2.8572	2.87035	2.95835	2.91315	2.99187	2.95967	2.92977	2.88384	2.96783	2.819	2.95174	3.08769	3.00488	2.73011	2.92753
TC0100000787.mm.1	2.503	2.51218	2.68768	2.63403	2.54141	1700019O17Rik	NM_027966	RIKEN cDNA 1700019O17 gene	2.54119	2.38765	2.48565	2.55137	2.54912	2.62321	2.40334	2.48595	2.5362	2.63325	2.55012	2.72043	2.8469	2.78593	2.57463	2.60806	2.68644	2.51512	2.48528	2.69273	2.62007	2.57793	2.33107
TC0100000788.mm.1	4.3889	4.32565	4.50117	4.42486	4.46101	NONMMUT001844	NONMMUT001844	NA	4.4394	4.39239	4.49853	4.35754	4.25666	4.35386	4.40145	4.41446	4.13282	4.41222	4.53141	4.40153	4.65951	4.44225	4.47698	4.44168	4.37451	4.38887	4.35655	4.66869	4.42253	4.50419	4.35308
TC0100000789.mm.1	2.55848	2.46768	2.51819	2.57098	2.54032	NONMMUT001847	NONMMUT001847	NA	2.58585	2.50484	2.60158	2.51599	2.58416	2.5317	2.41824	2.48791	2.43286	2.39179	2.63377	2.53916	2.50803	2.54484	2.48507	2.64744	2.57374	2.60379	2.49057	2.64735	2.61352	2.49658	2.45357
TC0100000790.mm.1	10.0557	10.0954	10.0783	9.93615	9.99261	Ptma	NM_008972	prothymosin alpha	10.1064	9.96461	10.1676	10.0459	9.99404	10.0823	10.0631	10.0566	10.1796	10.0519	9.99428	10.0738	10.1933	9.98957	9.93266	9.84264	9.93477	9.9811	10.0268	9.90576	10.1026	9.96391	9.96405
TC0100000791.mm.1	1.9686	1.94113	1.96318	1.97596	2.00999	NONMMUT001852	NONMMUT001852	NA	2.16078	2.06555	1.91918	1.97771	1.71976	1.99642	1.92124	1.82225	2.02461	1.8515	2.05466	1.98131	1.96523	2.02192	1.97186	1.80853	2.08644	1.99102	2.15266	1.97379	1.99756	1.98353	1.94241
TC0100000792.mm.1	5.0308	5.1204	5.02139	5.04672	5.08782	Cops7b	NM_172974	COP9 (constitutive photomorphogenic) homolog, subunit 7b (Arabidopsis thaliana)	5.0416	5.03471	5.03441	4.98296	5.06029	5.05338	5.12617	5.22629	5.07574	4.98935	5.05971	5.00997	5.02652	4.97572	5.04636	5.11522	5.08511	5.01119	5.09297	5.11553	5.11958	5.10815	5.00288
TC0100000793.mm.1	1.79896	1.825	1.69874	1.64625	1.76374	KnowTID_00000100	KnowTID_00000100	NA	1.82779	1.7103	1.8453	1.93001	1.6814	1.75232	1.86129	1.8983	1.78808	1.66225	1.67044	1.71667	1.74561	1.66575	1.56294	1.71478	1.77503	1.51274	1.80403	1.71254	1.73218	1.8092	1.76076
TC0100000794.mm.1	5.35589	5.34013	5.40687	5.29927	5.32422	Dis3l2	NM_001172157	DIS3 mitotic control homolog (S. cerevisiae)-like 2	5.34105	5.50779	5.44367	5.27334	5.21363	5.35154	5.28701	5.36412	5.35786	5.5143	5.3308	5.40237	5.38003	5.34522	5.36934	5.33704	5.38182	5.0629	5.34784	5.26954	5.34698	5.33771	5.31903
TC0100000795.mm.1	1.95565	2.01114	1.97423	1.8442	1.89286	NONMMUT001859	NONMMUT001859	NA	1.82447	1.94251	2.00745	2.19806	1.80575	1.88723	1.91883	2.15724	2.08127	1.94702	2.33294	1.63302	1.98394	1.95555	1.6754	1.77171	1.92466	1.89369	2.10934	1.76075	1.77997	1.90349	1.91077
TC0100000796.mm.1	3.06897	3.20102	3.04083	3.01417	2.76506	NONMMUT001860	NONMMUT001860	NA	3.06449	3.3067	2.77788	3.04374	3.15205	3.26554	3.13262	3.105	3.30091	2.98761	3.36033	2.78153	3.03383	3.14558	3.07836	2.96776	3.14179	2.73735	2.76934	3.06339	2.42991	2.79021	2.77246
TC0100000797.mm.1	2.35409	2.59087	2.42315	2.30567	2.37409	NONMMUT001861	NONMMUT001861	NA	2.26499	2.24022	2.35662	2.59475	2.31389	2.37044	2.80059	2.46012	2.73232	2.25914	2.62324	2.38744	2.42276	2.44337	2.27264	2.45788	2.16131	2.19315	2.3904	2.35836	2.25698	2.45411	2.41059
TC0100000798.mm.1	2.08595	2.08913	2.15271	2.01462	2.08418	NONMMUT001863	NONMMUT001863	NA	1.94163	2.09326	2.29512	1.92314	2.1766	2.10437	2.00338	2.03259	2.21616	2.06251	2.16357	2.18425	2.20051	2.07188	2.08026	1.96518	2.04578	1.90999	2.03092	2.11358	2.12432	2.04903	2.10306
TC0100000799.mm.1	1.80312	1.76568	1.64209	1.62892	1.61289	NONMMUT001864	NONMMUT001864	NA	1.41071	1.8568	1.68322	2.05432	2.01055	1.68544	1.73497	1.71992	1.9224	1.71583	1.54829	1.66534	1.63888	1.62968	1.61671	1.45972	1.94717	1.49132	1.76625	1.57333	1.4752	1.46471	1.78496
TC0100000800.mm.1	2.41321	2.42681	2.29728	2.32467	2.22745	NONMMUT001865	NONMMUT001865	NA	2.18511	2.51866	2.37851	2.56536	2.41844	2.26039	2.66301	2.38392	2.39995	2.29112	2.36238	2.51551	2.0201	2.40663	2.399	2.34536	2.3047	2.16768	2.22085	2.17404	2.33538	2.17564	2.23133
TC0100000801.mm.1	2.41786	2.43878	2.28341	2.18792	2.16476	NONMMUT001867	NONMMUT001867	NA	2.30579	2.50511	2.46927	2.33105	2.47806	2.18406	2.595	2.69268	2.28339	2.26402	2.34222	2.13995	2.38745	2.2188	2.2425	2.03995	2.24983	2.18849	2.06886	2.43871	2.00274	2.0296	2.28387
TC0100000802.mm.1	1.25444	1.23312	1.38676	1.25061	1.30596	NONMMUT001869	NONMMUT001869	NA	1.13201	1.24586	1.35136	1.29894	1.24401	1.27959	1.18048	1.22958	1.24283	1.33261	1.54063	1.19793	1.47587	1.13147	1.50482	1.1457	1.29751	1.17354	1.08315	1.34878	1.4085	1.37315	1.31623
TC0100000803.mm.1	2.88023	2.80613	2.88218	2.87937	2.9005	NONMMUT001871	NONMMUT001871	NA	2.882	2.83449	2.82222	2.88226	2.98019	2.88239	2.80116	2.91173	2.62926	2.76245	2.88892	2.84678	3.03055	2.87004	2.87113	3.01652	2.91042	2.72873	2.84529	2.94467	3.0729	2.86048	2.77917
TC0100000804.mm.1	5.66179	5.47103	5.48381	5.63472	5.33905	LOC102635830	uc007bvx.1	uncharacterized LOC102635830	5.29932	5.73033	5.41769	5.85166	6.00992	5.32339	5.49238	5.57333	5.49503	5.4985	5.44352	5.59219	5.40103	5.68817	5.53451	5.58506	5.52601	5.83986	5.37278	5.29401	5.39976	5.2999	5.32879
TC0100000805.mm.1	2.20713	2.14337	2.25217	2.22931	2.21232	NONMMUT001874	NONMMUT001874	NA	2.2727	2.1703	2.26168	2.12915	2.20181	2.20018	2.12305	2.07874	2.17149	1.96527	2.39074	2.26086	2.39182	2.12943	2.23556	2.27055	2.20188	2.30914	2.2943	2.34535	2.21725	2.09293	2.1118
TC0100000806.mm.1	3.71789	3.70043	3.77473	3.73824	3.74373	Akp3	NM_007432	alkaline phosphatase 3, intestine, not Mn requiring	3.74615	3.69994	3.7703	3.64132	3.73176	3.70739	3.61707	3.79024	3.68702	3.63937	3.78999	3.67073	3.99885	3.81453	3.64991	3.77762	3.72076	3.72835	3.69918	3.89263	3.81668	3.6954	3.61475
TC0100000807.mm.1	2.38933	2.44035	2.53287	2.50652	2.48851	NONMMUT001876	NONMMUT001876	NA	2.45119	2.34447	2.5696	2.14387	2.43753	2.4582	2.55927	2.48825	2.25567	2.45791	2.48679	2.40117	2.78561	2.55189	2.43566	2.64647	2.44659	2.45199	2.3411	2.58055	2.72899	2.51691	2.27498
TC0100000808.mm.1	4.11469	4.0766	4.174	4.19285	4.18435	Prss56	NM_027084	protease, serine 56	4.19798	4.0622	4.16145	4.02787	4.12395	4.13496	4.08387	4.16878	3.9188	4.07705	4.15007	4.0879	4.38097	4.2507	4.1941	4.20775	4.16164	4.15007	4.09981	4.39592	4.17154	4.11879	4.1357
TC0100000809.mm.1	3.92964	3.90749	3.98974	3.96286	4.02128	Chrnd	NM_021600	cholinergic receptor, nicotinic, delta polypeptide	3.97254	3.87749	3.99148	3.85697	3.94972	4.04145	3.78331	3.92792	3.87727	3.85625	4.02106	3.93742	4.14422	4.07043	3.97224	3.96188	3.84823	3.96152	3.91758	4.30849	3.9899	3.99388	3.89653
TC0100000810.mm.1	3.86761	3.79329	3.88316	3.87518	3.87955	Chrng	NM_009604	cholinergic receptor, nicotinic, gamma polypeptide	3.93859	3.80469	3.87024	3.7573	3.96722	3.84752	3.85821	3.80211	3.66533	3.72825	3.89199	3.88814	4.02424	3.98925	3.85558	3.89646	3.76962	3.86502	3.7363	3.96259	3.89748	3.91657	3.88481
TC0100000811.mm.1	5.65381	5.56892	5.54937	5.54733	5.58633	Eif4e2	NM_001039169	eukaryotic translation initiation factor 4E member 2	5.56683	5.74641	5.67365	5.59697	5.68518	5.54508	5.51979	5.55646	5.65437	5.56718	5.44986	5.55084	5.62957	5.44708	5.53314	5.5382	5.55337	5.66486	5.56835	5.57155	5.61052	5.57925	5.60197
TC0100000812.mm.1	2.54765	2.4575	2.55928	2.56284	2.4736	Gm26187	ENSMUST00000157693	predicted gene, 26187	2.56434	2.51829	2.361	2.72995	2.56468	2.59017	2.48477	2.47546	2.27962	2.29278	2.62128	2.45069	2.87237	2.82363	2.51285	2.64798	2.60388	2.22587	2.62226	2.48949	2.31957	2.49349	2.44321
TC0100000813.mm.1	9.08853	9.58706	9.51774	9.47258	9.14952	Efhd1	NM_028889	EF hand domain containing 1	9.40497	9.06455	8.38232	9.27595	9.31487	9.48418	9.61874	9.73457	9.51075	9.66107	9.55511	9.56505	9.28974	9.42279	9.60791	9.43315	9.4295	9.46952	9.5342	9.33008	8.55432	9.20229	9.12673
TC0100000814.mm.1	6.51561	6.59673	6.58356	6.47681	6.49619	Gigyf2	NM_001110212	GRB10 interacting GYF protein 2	6.53311	6.51977	6.40469	6.62261	6.49786	6.57197	6.5713	6.54828	6.69538	6.66706	6.56863	6.57643	6.52212	6.41229	6.51751	6.42741	6.45454	6.57227	6.53124	6.39499	6.47216	6.47892	6.60365
TC0100000815.mm.1	2.37197	2.38175	2.32826	2.51501	2.44265	KnowTID_00000101	KnowTID_00000101	NA	2.46836	2.34162	2.10909	2.45575	2.48502	2.21245	2.11845	2.34635	2.84973	2.20354	2.40842	2.13939	2.56169	2.50869	2.53292	2.44314	2.67026	2.42005	2.52347	2.70377	2.10912	2.42293	2.45396
TC0100000816.mm.1	4.33756	4.26454	4.42551	4.28687	4.28784	3110079O15Rik	NM_028473	RIKEN cDNA 3110079O15 gene	4.31565	4.38124	4.37579	4.26846	4.34668	4.35984	4.2664	4.31817	4.11374	4.25927	4.46997	4.41263	4.56018	4.41945	4.27237	4.22034	4.28247	4.23973	4.26966	4.54072	4.13023	4.26824	4.23035
TC0100000817.mm.1	3.3758	3.31793	3.39314	3.3874	3.28301	Neu2	NM_001160163	neuraminidase 2	3.69344	3.34514	3.34033	3.27493	3.22518	3.35822	3.2952	3.32064	3.29767	3.36662	3.46127	3.28288	3.46179	3.36056	3.49744	3.33814	3.45546	3.28541	3.24377	3.42357	3.19636	3.33142	3.21992
TC0100000818.mm.1	9.22507	9.30741	9.33021	9.22458	9.28273	Gm17181	ENSMUST00000168856	predicted gene 17181	9.27675	9.14517	9.22213	9.22621	9.25511	9.34784	9.24543	9.29081	9.34555	9.35468	9.34756	9.28822	9.33037	9.23563	9.22447	9.32068	9.19189	9.15025	9.33848	9.22683	9.39791	9.28319	9.16724
TC0100000819.mm.1	4.50966	4.38125	4.45922	4.5297	4.35371	NONMMUT001895	NONMMUT001895	NA	4.55229	4.43972	4.56047	4.54434	4.45146	4.52239	4.4184	4.39414	4.19006	4.34118	4.58518	4.44233	4.46818	4.62796	4.51711	4.62222	4.48615	4.39504	4.24905	4.43404	4.41131	4.3247	4.34946
TC0100000820.mm.1	1.66131	1.69699	1.77675	1.69288	1.64773	NONMMUT001896	NONMMUT001896	NA	1.67677	1.88458	1.63606	1.68442	1.4247	1.67922	1.72806	1.7597	1.62097	1.79417	1.66196	1.90342	1.74744	1.57297	1.84723	1.76068	1.69222	1.5913	1.56059	1.61742	1.48057	1.88285	1.69721
TC0100000821.mm.1	1.81348	1.78155	1.82419	1.75983	1.82662	NONMMUT001897	NONMMUT001897	NA	1.82446	1.99644	1.85677	1.71071	1.67901	1.76711	1.78834	1.7067	1.86404	1.67891	1.92077	1.77477	1.9223	1.75349	1.68306	1.73455	1.7375	1.89053	1.87679	2.03296	1.89347	1.64153	1.68836
TC0100000822.mm.1	6.33516	5.94381	5.75108	5.76715	5.95212	Inpp5d	NM_001110192	inositol polyphosphate-5-phosphatase D	5.55565	6.9194	6.82491	5.90604	6.4698	6.14101	5.92073	5.78856	5.92493	5.62793	5.73963	5.7342	5.90256	5.56814	5.66641	5.1191	5.97645	6.50567	5.78544	6.0281	6.03131	6.02613	5.88962
TC0100000823.mm.1	2.73191	2.70583	2.54925	2.64005	2.65376	NONMMUT001900	NONMMUT001900	NA	2.32292	2.69861	3.11738	2.84127	2.67936	2.52635	2.48772	2.56134	3.24793	2.37925	2.69867	2.4682	2.65088	2.88181	2.69257	2.38853	2.56959	2.66775	2.65421	2.70705	2.60643	2.76559	2.53551
TC0100000824.mm.1	5.49615	5.61222	5.5425	5.57041	5.5897	Atg16l1	NM_001205391	autophagy related 16-like 1 (S. cerevisiae)	5.52766	5.48978	5.36567	5.54523	5.55241	5.5995	5.5942	5.51629	5.73889	5.63939	5.47372	5.57854	5.47834	5.44821	5.61839	5.52705	5.58384	5.67457	5.59134	5.65247	5.46197	5.6096	5.63314
TC0100000825.mm.1	7.23145	7.22671	7.07321	7.26393	7.37782	Gm25395	ENSMUST00000157343	predicted gene, 25395	7.14249	6.99093	7.54061	7.24865	7.23454	7.22983	7.20042	7.25293	7.22365	7.23735	6.93175	7.09302	7.0307	7.05125	7.30025	7.27225	7.27766	7.41825	7.43811	7.47912	7.61933	7.13698	7.21557
TC0100000826.mm.1	6.70492	6.61987	6.37348	6.5767	6.56164	Scarna6	NR_028519	small Cajal body-specific RNA 6	6.48771	6.46995	7.15678	6.62418	6.78597	6.59903	6.52449	6.77605	6.5799	6.47378	6.07581	6.43351	6.51083	6.58477	6.53946	6.48607	6.59119	6.682	6.61171	6.598	6.89125	6.26957	6.43768
TC0100000827.mm.1	4.67998	4.69755	4.6155	4.65254	4.66325	5830472F04Rik	ENSMUST00000097661	RIKEN cDNA 5830472F04 gene	4.44029	4.87794	4.63706	4.64831	4.79631	4.56535	4.75181	4.7975	4.67553	4.54737	4.74366	4.55698	4.61397	4.88292	4.50685	4.38689	4.76312	4.7229	4.64356	4.63697	4.54927	4.73622	4.75022
TC0100000828.mm.1	3.00657	2.94821	3.02461	3.0571	3.02902	Sag	NM_009118	S-antigen, retina and pineal gland (arrestin)	3.03794	2.96027	3.13473	2.95695	2.94293	2.98185	2.97017	2.97861	2.8622	2.91491	3.02077	2.99358	3.16918	3.09598	2.99658	3.08132	3.04371	3.0679	3.02221	3.06061	3.02363	3.05628	2.98237
TC0100000829.mm.1	6.38903	6.33111	6.36386	6.41647	6.39303	Dgkd	NM_177646	diacylglycerol kinase, delta	6.40326	6.37411	6.17617	6.51689	6.47474	6.30951	6.38885	6.2431	6.38298	6.44001	6.28729	6.40629	6.32184	6.42035	6.3745	6.36216	6.44261	6.48273	6.4592	6.35766	6.23789	6.36501	6.54537
TC0100000830.mm.1	2.74516	2.64597	2.63223	2.62337	2.54669	NONMMUT001908	NONMMUT001908	NA	2.60455	2.78097	2.71025	2.70606	2.92398	2.69197	2.60143	2.71945	2.57103	2.55971	2.56521	2.67237	2.73165	2.69252	2.56688	2.48304	2.36932	3.00508	2.70115	2.45862	2.53324	2.4525	2.58796
TC0100000831.mm.1	3.00857	3.10892	2.98476	2.97212	2.99619	NONMMUT001909	NONMMUT001909	NA	2.76468	3.17737	2.86812	3.19865	3.03402	3.01223	3.20735	3.08683	3.12926	2.99348	2.99868	3.02269	2.92419	3.13421	3.07154	2.87469	2.74705	3.03312	2.91981	2.95843	2.86029	3.04285	3.19959
TC0100000832.mm.1	3.78536	3.73632	3.63375	3.69761	3.68077	NONMMUT001910	NONMMUT001910	NA	3.81848	3.70101	3.61439	3.84135	3.95157	3.7478	3.71095	3.69047	3.79607	3.66738	3.58477	3.5733	3.70956	3.61544	3.69174	3.73633	3.70025	3.74427	3.70843	3.71973	3.58078	3.63801	3.75689
TC0100000833.mm.1	6.10866	6.06538	6.07623	6.26172	6.2115	Gm25198	ENSMUST00000178574	predicted gene, 25198	6.04156	6.09133	6.29664	6.1586	5.95517	6.12968	6.03342	6.14242	5.95598	5.71716	6.21676	6.15297	6.21804	6.22997	6.16748	6.29891	6.28698	6.32525	6.05489	6.20633	6.30179	6.13279	6.36169
TC0100000834.mm.1	4.16776	4.18693	4.13015	3.93525	4.07664	Gm5832	ENSMUST00000121704	predicted gene 5832	3.85407	4.45119	4.39017	4.12611	4.01727	4.10478	4.32332	4.05951	4.26011	4.09884	4.30247	4.06415	4.05512	3.68128	4.08104	3.89458	3.88861	4.13075	4.13912	3.86098	4.10917	4.30229	3.97165
TC0100000835.mm.1	1.80856	1.72443	1.70321	1.88029	1.7784	Gm15375	ENSMUST00000119510	predicted gene 15375	1.68706	1.88039	1.84092	1.71878	1.91567	1.64308	1.77974	1.75693	1.71798	1.4911	1.8277	1.69532	1.79874	1.99686	1.81824	1.89562	1.96715	1.7236	1.71013	1.71668	2.11644	1.51927	1.82948
TC0100000836.mm.1	4.49086	4.15967	4.05047	4.16761	4.36711	Ugt1a2	NM_013701	UDP glucuronosyltransferase 1 family, polypeptide A2	4.03597	4.50248	4.66013	4.58413	4.67158	4.19003	4.25442	4.00929	4.18494	4.10788	3.99935	4.06646	4.0282	4.37158	4.12279	3.85796	4.18392	4.30178	4.26457	4.13857	4.64659	4.22855	4.55726
TC0100000837.mm.1	4.15513	4.05647	4.06572	4.13241	4.07035	Gm15373	ENSMUST00000121495	predicted gene 15373	4.15895	4.28407	4.17593	3.96807	4.18865	4.25873	3.96307	4.05343	3.95065	3.94378	4.07722	3.98048	4.2614	4.10494	3.9234	4.08549	4.12973	4.41848	3.86473	4.21265	4.06248	3.97929	4.23261
TC0100000838.mm.1	2.63465	2.45247	2.54514	2.61259	2.61727	Gm15372	ENSMUST00000120729	predicted gene 15372	2.54687	2.77496	2.80033	2.72276	2.32834	2.50399	2.46598	2.50301	2.33692	2.27084	2.76329	2.56633	2.58009	2.66339	2.39792	2.5197	2.77828	2.70368	2.63408	2.60705	2.52434	2.5679	2.753
TC0100000839.mm.1	2.48415	2.42996	2.53181	2.46471	2.46248	Gm15370	ENSMUST00000117158	predicted gene 15370	2.52578	2.50806	2.48585	2.36846	2.53259	2.53955	2.41169	2.466	2.3026	2.50019	2.58899	2.50165	2.5364	2.49974	2.39314	2.48884	2.45921	2.48259	2.31108	2.66164	2.45518	2.31129	2.57321
TC0100000840.mm.1	4.30997	4.27759	4.1615	4.22151	4.30401	Gm15369	ENSMUST00000119681	predicted gene 15369	4.08512	4.5909	4.06715	4.32857	4.47811	4.19564	4.37353	4.495	4.0462	4.11928	4.12969	4.19017	4.20686	4.27746	4.14004	4.2005	4.2107	4.27888	4.13772	4.30563	4.32715	4.20032	4.54925
TC0100000841.mm.1	3.73446	3.54078	3.24707	3.50472	3.5207	Gm15374	ENSMUST00000119313	predicted gene 15374	3.28616	4.05351	3.51522	3.91692	3.9005	3.51784	3.68919	3.36279	3.59331	3.08194	3.45354	3.33545	3.11736	3.81338	3.49022	3.11461	3.58111	3.52429	3.44308	3.41952	3.49085	3.35299	3.89704
TC0100000842.mm.1	2.28683	2.14604	1.99678	1.97847	2.24414	Gm15371	ENSMUST00000117057	predicted gene 15371	1.99226	2.5002	2.01168	2.29451	2.63552	1.89644	2.15882	2.09294	2.43597	1.82751	1.9918	2.34343	1.8244	2.07167	2.05688	1.76263	1.90907	2.09211	2.12436	2.28451	2.17901	2.17851	2.45431
TC0100000843.mm.1	2.15095	2.02868	2.12998	2.11023	2.0745	Gm15368	ENSMUST00000120438	predicted gene 15368	2.04076	2.32972	2.13024	2.0116	2.24243	2.23093	2.07081	1.93543	1.87755	2.07122	2.26022	2.23666	1.9518	2.05908	2.07794	2.17431	2.00034	2.2395	1.94791	1.94201	2.02252	2.18147	2.27859
TC0100000844.mm.1	2.4533	2.33488	2.35095	2.3958	2.25424	Gm15376	ENSMUST00000122258	predicted gene 15376	2.37178	2.56342	2.28044	2.47273	2.57815	2.33494	2.32083	2.24624	2.43749	2.3051	2.41129	2.31374	2.37367	2.37391	2.36425	2.4815	2.4015	2.35783	2.20916	2.25216	2.18213	2.29107	2.3367
TC0100000845.mm.1	3.02969	2.99677	3.09892	3.0572	3.08182	Mroh2a	NM_001177364	maestro heat-like repeat family member 2A	3.07856	2.96951	3.06107	3.01321	3.02609	3.01544	3.03753	3.05224	2.88189	3.00669	3.11248	3.05355	3.22296	3.11538	3.06823	3.03426	3.03993	3.02817	2.98641	3.20775	3.12375	3.05478	3.03641
TC0100000846.mm.1	2.11238	2.12734	2.15408	2.17397	2.16827	Trpm8	NM_134252	transient receptor potential cation channel, subfamily M, member 8	2.1384	2.13353	2.11807	2.10092	2.071	2.19881	2.07189	2.16241	2.07624	2.04605	2.13733	2.11801	2.31494	2.25626	2.15175	2.15297	2.1471	2.16177	2.11078	2.30831	2.13398	2.1722	2.11608
TC0100000847.mm.1	2.27605	2.29467	2.34535	2.30656	2.31646	Spp2	NM_029269	secreted phosphoprotein 2	2.36604	2.2491	2.2485	2.19563	2.321	2.24383	2.37503	2.40305	2.15675	2.18241	2.34249	2.34623	2.51025	2.48613	2.31212	2.23167	2.29243	2.21043	2.1862	2.49329	2.31815	2.32461	2.26003
TC0100000848.mm.1	2.57307	2.55145	2.67047	2.75931	2.63455	NONMMUT001942	NONMMUT001942	NA	2.62473	2.61734	2.43095	2.5721	2.62024	2.75091	2.30999	2.75342	2.39147	2.55252	2.72035	2.75912	2.64991	2.89298	2.65508	2.8683	2.73371	2.64648	2.53478	2.80465	2.57622	2.86658	2.39054
TC0100000849.mm.1	2.61682	2.58009	2.65045	2.65295	2.64114	Gm19589	NR_037971	predicted gene, 19589	2.59107	2.59712	2.51262	2.78479	2.59851	2.61724	2.62263	2.52272	2.55778	2.60758	2.68951	2.63709	2.66763	2.64253	2.68785	2.63398	2.61509	2.68531	2.60008	2.73738	2.66604	2.60758	2.59463
TC0100000850.mm.1	1.67638	1.66541	1.72887	1.70432	1.71696	KnowTID_00000104	KnowTID_00000104	NA	1.68161	1.66005	1.91485	1.66065	1.46476	1.74485	1.73133	1.5907	1.59476	1.53771	1.78505	1.68645	1.90627	1.63073	1.66339	1.65428	1.67229	1.90093	1.67759	1.64867	1.71607	1.81431	1.72817
TC0100000851.mm.1	2.21303	2.1691	2.21234	2.24875	2.37395	NONMMUT001949	NONMMUT001949	NA	2.20149	2.30565	1.99705	2.16569	2.39527	2.31286	2.23058	2.12244	2.01052	2.05153	2.33894	2.07633	2.38257	2.46719	2.21758	2.18066	2.26902	2.10931	2.22506	2.42304	2.4201	2.4583	2.34326
TC0100000852.mm.1	4.18307	4.04309	4.0749	4.19042	4.19227	2410088K16Rik	NR_040493	RIKEN cDNA 2410088K16 gene	4.13916	4.17536	4.18266	4.12449	4.29366	4.03731	4.13087	4.03666	3.96752	3.8961	4.18834	3.98647	4.22867	4.32139	4.24799	4.16923	4.12377	4.08971	4.09904	4.20957	4.39357	4.15073	4.10842
TC0100000853.mm.1	2.4024	2.28134	2.40334	2.33469	2.46135	1700067G17Rik	NR_040471	RIKEN cDNA 1700067G17 gene	2.40765	2.56884	2.51781	2.3025	2.21521	2.5113	2.20168	2.33338	2.07899	2.32833	2.36535	2.41724	2.50242	2.23219	2.43419	2.23435	2.35784	2.4149	2.36303	2.49178	2.53554	2.53022	2.38619
TC0100000854.mm.1	5.79072	5.90621	5.78889	5.91175	5.68337	Sh3bp4	NM_133816	SH3-domain binding protein 4	5.98497	5.6787	5.57312	5.90102	5.81579	5.7747	5.89945	6.01531	5.93537	5.79858	5.68599	5.84018	5.83081	6.09673	5.9815	5.70774	5.85182	5.92095	5.86855	5.81334	5.4536	5.62326	5.65811
TC0100000855.mm.1	3.07736	3.00784	3.20972	3.0853	3.13828	NONMMUT001961	NONMMUT001961	NA	2.96522	2.99887	3.08617	3.06588	3.27068	3.16741	2.96506	3.02789	2.87101	3.53757	3.2462	3.1214	2.93371	3.18762	3.20803	2.8992	3.09538	3.03629	3.05702	3.22339	3.10214	3.10623	3.2026
TC0100000856.mm.1	5.96237	5.88718	6.01732	6.09608	5.98484	NONMMUT001962	NONMMUT001962	NA	5.94041	5.98636	5.92088	5.93094	6.03326	5.84918	6.01634	5.89926	5.78394	5.80351	6.18053	5.96984	6.1154	6.24094	6.0607	6.15322	6.04693	5.97861	5.80549	6.12263	6.1072	5.89542	5.99344
TC0100000857.mm.1	4.04748	3.88041	3.98967	4.1701	3.94091	NONMMUT001964	NONMMUT001964	NA	4.10631	3.96392	4.09465	4.01247	4.06006	4.01505	4.04182	3.81021	3.65454	3.77587	4.08597	3.90708	4.18977	4.17577	4.25515	4.09107	4.16778	4.16074	3.75659	4.15123	3.84174	4.0142	3.94079
TC0100000858.mm.1	6.3612	6.37629	6.30348	6.39988	6.27073	Agap1	NM_001037136	ArfGAP with GTPase domain, ankyrin repeat and PH domain 1	6.38315	6.33412	6.31572	6.45412	6.31891	6.35557	6.33699	6.34902	6.46358	6.33874	6.24939	6.3597	6.26609	6.38427	6.41461	6.43489	6.31425	6.45139	6.32547	6.36774	6.05831	6.38338	6.21877
TC0100000859.mm.1	3.24582	3.21786	3.27802	3.31019	3.36035	NONMMUT001965	NONMMUT001965	NA	3.41791	3.30428	3.21579	3.17951	3.11158	3.38091	3.22411	3.14977	3.11664	3.08009	3.31661	3.10136	3.61403	3.27585	3.41621	3.17341	3.26066	3.42481	3.2012	3.40721	3.39367	3.20458	3.59507
TC0100000860.mm.1	6.48405	6.452	6.59503	6.48093	6.59124	NONMMUT001967	NONMMUT001967	NA	6.52424	6.545	6.6826	6.34333	6.32507	6.48826	6.64536	6.50515	6.16922	6.17744	6.78957	6.60521	6.80789	6.67206	6.44679	6.37755	6.41422	6.49405	6.47097	6.68981	6.65454	6.49968	6.64117
TC0100000861.mm.1	2.61855	2.81569	2.60985	2.4928	2.54681	NONMMUT001968	NONMMUT001968	NA	2.62698	2.49501	2.68114	2.64696	2.64266	2.63408	2.8827	2.61544	3.13055	2.54091	2.59946	2.55416	2.74486	2.46233	2.36467	2.54907	2.56632	2.5216	2.41969	2.59484	2.29804	2.55485	2.86665
TC0100000862.mm.1	5.12859	5.11412	5.18543	5.17498	5.23242	Gm25180	ENSMUST00000157746	predicted gene, 25180	5.12914	5.11843	5.38287	5.07381	4.93872	5.20328	5.16073	5.11966	4.97281	4.986	5.12983	5.18313	5.44275	5.17108	5.12348	5.12727	5.20282	5.25022	4.95513	5.18613	5.44817	5.42621	5.14645
TC0100000863.mm.1	1.95349	1.84311	1.84586	1.81229	1.84863	Gm26037	ENSMUST00000158150	predicted gene, 26037	1.76468	2.05622	1.93347	2.23939	1.77368	1.95449	1.50506	1.99816	1.91472	1.95314	1.86538	1.74141	1.8235	1.91638	1.73053	1.74424	1.80378	1.8665	1.83808	1.79821	1.83721	2.00147	1.7682
TC0100000864.mm.1	3.09529	3.05021	2.96634	3.03341	2.98362	NONMMUT001979	NONMMUT001979	NA	2.9289	3.27378	2.83489	3.33491	3.10396	2.9484	2.9907	2.86522	3.39653	3.01342	2.84525	2.99273	3.01396	3.41649	2.93531	2.90069	2.948	2.96654	2.88638	2.983	3.13273	2.74158	3.17442
TC0100000865.mm.1	3.8077	3.58934	3.68712	3.73965	3.64957	NONMMUT001980	NONMMUT001980	NA	3.70978	3.80116	3.86562	3.896	3.76596	3.45658	3.75186	3.50411	3.64483	3.56908	3.67914	3.72731	3.77297	3.82987	3.50804	3.85238	3.759	3.74899	3.55155	3.88177	3.5457	3.75033	3.51852
TC0100000866.mm.1	1.88673	1.91578	1.83219	1.82667	1.88039	NONMMUT001981	NONMMUT001981	NA	1.90537	1.97903	1.83032	1.62593	2.09303	1.72797	1.98881	1.89444	2.05189	1.81121	1.90467	1.74617	1.8667	1.78414	1.66913	1.98879	1.74781	1.94348	1.83653	1.68321	2.12003	1.83021	1.93197
TC0100000867.mm.1	3.33615	3.33694	3.30736	3.30112	3.45605	NONMMUT001982	NONMMUT001982	NA	3.16201	3.55604	3.35173	3.26987	3.34108	3.64851	3.15461	3.39223	3.15239	3.37466	3.37477	3.14911	3.33088	3.56905	3.06733	3.30286	3.21933	3.34702	3.10073	3.4547	3.6301	3.45809	3.63665
TC0100000868.mm.1	4.59202	4.4966	4.61816	4.60906	4.52906	D130058E05Rik	ENSMUST00000173856	RIKEN cDNA D130058E05 gene	4.73678	4.51577	4.57318	4.63069	4.50367	4.54743	4.51983	4.58239	4.33673	4.54317	4.61349	4.66775	4.64824	4.65171	4.46483	4.58655	4.75731	4.58491	4.55281	4.70204	4.4082	4.5004	4.48184
TC0100000869.mm.1	2.0492	2.03674	2.0971	2.03883	2.02033	KnowTID_00000107	KnowTID_00000107	NA	2.12813	2.02754	1.94861	1.99463	2.1471	2.01401	2.01408	1.97631	2.14258	1.97435	2.15684	2.01707	2.24016	2.08179	2.07893	2.02424	2.01078	1.99844	1.93962	2.16422	2.06785	1.95046	1.97949
TC0100000870.mm.1	5.63112	5.65536	5.38653	5.44225	5.59183	Ackr3	NM_001271607	atypical chemokine receptor 3	5.55643	5.33439	5.83166	5.73573	5.6974	5.54826	5.73543	5.66456	5.67321	5.48798	5.21756	5.5052	5.33537	5.44174	5.57974	5.20837	5.46262	5.51878	5.41882	5.58518	5.96977	5.3649	5.62049
TC0100000871.mm.1	4.60216	4.65986	4.52194	4.51101	4.58933	NONMMUT001992	NONMMUT001992	NA	4.66672	4.50653	4.27004	4.63755	4.92994	4.58768	4.77462	4.56117	4.71598	4.79932	4.73479	4.16526	4.3884	4.59495	4.70862	4.14734	4.29385	4.81032	4.30337	4.64631	4.69822	4.49598	4.80278
TC0100000872.mm.1	1.89157	1.92916	1.94966	1.92426	1.9391	KnowTID_00000108	KnowTID_00000108	NA	1.74037	1.7812	2.05003	1.96162	1.92462	1.85306	1.89182	1.92793	2.04383	1.90922	1.76898	2.06619	2.05423	2.01518	1.88893	1.77879	1.9685	1.96991	1.96124	2.11559	1.67112	2.0419	1.90566
TC0100000873.mm.1	3.02209	2.93139	2.95836	2.93341	2.92153	KnowTID_00000109	KnowTID_00000109	NA	3.07685	2.829	2.76232	3.43001	3.01226	3.13646	2.70024	2.91769	2.97116	2.81822	2.92902	2.94108	3.14512	3.24879	2.82243	2.72473	2.78967	3.08145	2.70797	3.0146	3.20347	2.71518	2.96644
TC0100000874.mm.1	2.75021	2.60286	2.70848	2.68989	2.65543	NONMMUT001997	NONMMUT001997	NA	2.76987	2.85644	2.68088	2.8123	2.63154	2.6224	2.5402	2.67785	2.571	2.66773	2.82923	2.58821	2.74874	2.65999	2.59399	2.73944	2.70934	2.74667	2.57909	2.65601	2.76922	2.68847	2.58433
TC0100000875.mm.1	3.62383	3.56828	3.715	3.6671	3.622	ENSMUST00000184315	ENSMUST00000184315	ncrna:known chromosome:GRCm38:1:90327312:90327418:1 gene:ENSMUSG00000098368 gene_biotype:rRNA transcript_biotype:rRNA	3.60526	3.79834	3.75931	3.56566	3.39055	3.63361	3.53845	3.59094	3.51011	3.82203	3.77047	3.59362	3.6739	3.76873	3.64085	3.67435	3.59857	3.653	3.64635	3.74993	3.56597	3.61699	3.53076
TC0100000876.mm.1	3.3421	3.33897	3.40549	3.34033	3.36818	NONMMUT001998	NONMMUT001998	NA	3.38044	3.29449	3.27107	3.30232	3.46216	3.39648	3.27885	3.37217	3.3084	3.04962	3.44951	3.34556	3.77727	3.58125	3.35036	3.27511	3.18933	3.3056	3.43541	3.40622	3.3704	3.3983	3.23054
TC0100000877.mm.1	3.30377	3.4688	3.32908	3.33692	3.366	KnowTID_00000110	KnowTID_00000110	NA	3.43428	3.10153	3.3453	3.26996	3.36775	3.41562	3.65994	3.35336	3.44627	3.05998	3.35703	3.25501	3.64431	3.32516	3.48723	3.03057	3.35736	3.48431	3.36918	3.37078	3.45065	3.44327	3.19613
TC0100000878.mm.1	7.33112	7.63731	7.44096	7.45984	7.45843	Cops8	NM_133805	COP9 (constitutive photomorphogenic) homolog, subunit 8 (Arabidopsis thaliana)	7.49004	7.21058	7.17329	7.35749	7.42421	7.62017	7.6398	7.59582	7.69347	7.6567	7.34113	7.39623	7.3698	7.37363	7.53255	7.51144	7.43843	7.44313	7.58849	7.48761	7.34007	7.50662	7.36934
TC0100000879.mm.1	3.00731	3.23849	3.02475	2.98312	3.12642	Gm9991	XR_106072	predicted gene 9991	3.26011	2.85479	2.85963	3.13978	2.92224	3.24529	3.1579	3.58391	2.96686	3.08707	3.04003	2.78669	3.1852	3.27306	2.9793	2.92426	2.91313	2.82583	2.96331	3.5682	2.9048	3.10582	3.08999
TC0100000880.mm.1	1.87333	1.84624	1.91669	1.80874	1.7815	KnowTID_00000111	KnowTID_00000111	NA	1.83707	1.97135	1.87191	1.8834	1.80291	1.85959	1.96613	1.74461	1.81463	1.84383	1.93025	1.96037	1.93229	1.88205	1.7899	1.86139	1.77003	1.7403	1.76437	1.91697	1.58717	1.78884	1.85016
TC0100000881.mm.1	1.73297	1.70104	1.73605	1.7185	1.73988	KnowTID_00000112	KnowTID_00000112	NA	1.73881	1.7542	1.71467	1.80279	1.65437	1.65664	1.72354	1.73414	1.68985	1.78209	1.6264	1.65996	1.87574	1.78535	1.81741	1.63377	1.74113	1.61484	1.8318	1.74438	1.85221	1.71756	1.55346
TC0100000882.mm.1	5.34811	5.46609	5.52646	5.24656	5.32366	Mlph	NM_053015	melanophilin	5.2039	5.49921	5.30179	5.36492	5.37073	5.39784	5.44002	5.74749	5.27901	5.4095	5.4947	5.63164	5.56998	5.32057	5.23298	5.18261	5.2857	5.21096	5.37055	5.45326	5.01205	5.3948	5.38766
TC0100000883.mm.1	5.63214	5.58537	5.74158	5.80167	5.79463	Prlh	NM_001101647	prolactin releasing hormone	5.71729	5.51941	5.71333	5.59605	5.61461	5.67837	5.61757	5.59197	5.45355	5.50543	5.72853	5.61494	6.11743	6.07134	5.67201	5.77322	5.63519	5.85656	5.6085	6.01985	5.91421	5.79303	5.63758
TC0100000884.mm.1	7.30356	7.54135	7.41772	7.3987	7.2476	Lrrfip1	NM_001111311	leucine rich repeat (in FLII) interacting protein 1	7.38413	7.26165	7.05078	7.44946	7.37176	7.37271	7.50386	7.62496	7.66389	7.55187	7.35871	7.38765	7.37266	7.50082	7.42565	7.36283	7.30353	7.40068	7.40955	7.35388	6.93965	7.27238	7.26255
TC0100000885.mm.1	1.47846	1.48095	1.51109	1.49929	1.47967	Rbm44	NM_001033408	RNA binding motif protein 44	1.49301	1.47014	1.52903	1.43471	1.46538	1.47331	1.50658	1.46217	1.48174	1.44663	1.58023	1.45887	1.55863	1.49968	1.49251	1.45326	1.53548	1.51553	1.47593	1.57571	1.51425	1.41582	1.41662
TC0100000886.mm.1	4.99053	5.29458	5.26594	5.21748	5.11001	Ramp1	NM_001168392	receptor (calcitonin) activity modifying protein 1	5.30549	5.02758	4.6909	4.98677	4.94189	5.21428	5.27797	5.47615	5.20991	5.38693	5.17739	5.20353	5.2959	5.2952	5.42392	5.14756	5.1865	5.03421	5.31861	5.38185	4.75261	5.09052	5.00647
TC0100000887.mm.1	2.62366	2.61258	2.6103	2.68472	2.62946	NONMMUT002013	NONMMUT002013	NA	2.59961	2.64273	2.28811	2.98016	2.60768	2.71469	2.55404	2.55167	2.62992	2.43743	2.63839	2.57259	2.7928	2.61002	2.62965	2.64388	2.75494	2.7851	2.58778	2.84188	2.46952	2.61563	2.63247
TC0100000888.mm.1	1.74138	1.74252	1.76949	1.77448	1.78313	NONMMUT002014	NONMMUT002014	NA	1.72099	1.6481	1.6459	1.95969	1.73224	1.69423	1.81548	1.71004	1.75032	1.65481	1.78513	1.83037	1.80765	1.93642	1.82762	1.76045	1.7286	1.61931	1.86035	1.954	1.73087	1.5549	1.81552
TC0100000889.mm.1	3.32517	3.43745	3.14019	3.36432	3.2495	NONMMUT002015	NONMMUT002015	NA	3.3573	3.13669	3.2294	3.40045	3.502	3.20057	3.56916	3.55826	3.42183	2.7697	3.17145	3.20905	3.41058	3.36339	3.53765	3.24588	3.22727	3.44742	3.22548	3.4845	2.99937	2.99361	3.54453
TC0100000890.mm.1	6.96572	7.08695	6.92596	6.89655	7.0043	Ube2f	NM_026454	ubiquitin-conjugating enzyme E2F (putative)	6.83916	7.04239	7.16034	6.81884	6.96784	7.02553	7.1437	7.05189	7.12667	6.99714	6.88896	6.90378	6.91397	6.69868	6.8864	6.83842	6.8521	7.20715	6.99018	6.98304	6.9826	7.02404	7.04166
TC0100000891.mm.1	5.80204	5.68874	5.61209	5.70079	5.63922	Gm7785	ENSMUST00000117121	predicted gene 7785	5.59997	5.69923	5.91677	5.92067	5.87354	5.5868	5.67696	5.63385	5.85734	5.55611	5.6626	5.68606	5.54359	5.73458	5.57982	5.63607	5.98279	5.57067	5.8417	5.41977	5.79394	5.5818	5.55891
TC0100000892.mm.1	5.53405	5.50937	5.41062	5.36286	5.47843	Scly	NM_016717	selenocysteine lyase	5.38417	5.65135	5.91642	5.27487	5.44346	5.57524	5.46315	5.4796	5.5195	5.4086	5.32967	5.37446	5.52974	5.28163	5.31649	5.22548	5.43764	5.55307	5.30187	5.57672	5.5502	5.53264	5.4307
TC0100000893.mm.1	3.857	3.86335	3.89949	3.91395	3.93514	Espnl	NM_001033292	espin-like	3.9387	3.83707	3.96716	3.70751	3.83455	3.89837	3.83805	3.93912	3.77787	3.80485	3.95743	3.81442	4.02126	4.06246	3.78684	3.9042	3.88256	3.93371	3.8035	4.20278	4.06069	3.85434	3.7544
TC0100000894.mm.1	4.58672	4.956	4.85938	4.89319	4.78693	Klhl30	NM_027551	kelch-like 30	4.86308	4.66522	4.19242	4.6524	4.56048	4.84324	4.97123	5.13505	4.87448	4.96237	4.73466	4.84826	4.89224	4.81318	4.96384	4.91901	4.91788	4.85204	4.8622	5.05739	4.38629	4.84691	4.78187
TC0100000895.mm.1	4.33819	4.40849	4.47414	4.45181	4.42441	Fam132b	NM_173395	family with sequence similarity 132, member B	4.40215	4.34301	4.43512	4.21426	4.29643	4.45295	4.28207	4.46762	4.43134	4.30144	4.50058	4.41006	4.68448	4.52427	4.43853	4.46604	4.37787	4.45237	4.35797	4.62849	4.37486	4.39487	4.36586
TC0100000896.mm.1	1.58016	1.78054	1.76338	1.72832	1.71935	KnowTID_00000113	KnowTID_00000113	NA	1.57558	1.60622	1.69104	1.46522	1.56275	1.61088	1.66504	2.09968	1.74654	1.74692	1.72602	1.69202	1.88858	1.81598	1.62216	1.68184	1.67479	1.84683	1.57068	2.10568	1.508	1.90099	1.51137
TC0100000897.mm.1	4.92824	5.02252	5.06118	4.96712	5.04527	Traf3ip1	NM_028718	TRAF3 interacting protein 1	5.03755	4.87563	4.76915	5.0612	4.89767	5.00437	4.975	5.0516	5.05909	5.07607	4.92526	5.09491	5.14848	4.93681	4.90827	4.95493	4.92357	5.112	5.08004	5.06482	5.03757	5.0373	5.00661
TC0100000898.mm.1	4.80904	5.04012	4.86835	4.96584	4.97358	Asb1	NM_001039126	ankyrin repeat and SOCS box-containing 1	4.94929	4.71877	4.69176	4.83124	4.85415	4.93438	5.02539	5.0711	5.12958	4.80766	4.87115	4.84633	4.94827	4.8533	4.97499	5.13935	4.83969	5.02187	4.95967	4.97176	4.94594	5.01198	4.97853
TC0100000899.mm.1	6.15992	6.43552	6.14154	6.1483	6.40797	Twist2	NM_007855	twist basic helix-loop-helix transcription factor 2	6.01323	5.89604	6.2026	6.16802	6.51972	6.16041	6.40443	6.55734	6.61992	6.21287	5.93546	6.27254	6.1453	6.20289	6.18907	5.79023	6.10414	6.45517	6.39406	6.05114	6.98697	6.26965	6.33802
TC0100000900.mm.1	2.41202	2.40586	2.42408	2.3451	2.50078	NONMMUT002028	NONMMUT002028	NA	2.48662	2.45054	2.26661	2.24387	2.61248	2.40316	2.4196	2.56344	2.23725	2.35876	2.29272	2.32865	2.71618	2.30998	2.2057	2.29331	2.36341	2.55311	2.35148	2.52556	2.52913	2.67144	2.42631
TC0100000901.mm.1	2.0923	2.02791	2.12041	2.197	2.14896	KnowTID_00000114	KnowTID_00000114	NA	2.1152	2.15687	2.09791	1.96361	2.12789	2.07495	1.90741	2.17024	1.95904	2.02655	2.13199	2.04846	2.27464	2.13868	2.24184	2.34173	1.98256	2.2802	2.11304	2.22658	2.01973	2.24781	2.13763
TC0100000902.mm.1	2.53934	2.51716	2.56254	2.51664	2.46094	NONMMUT002031	NONMMUT002031	NA	2.3822	2.73115	2.58789	2.66049	2.33494	2.50634	2.57136	2.42565	2.56529	2.57661	2.47593	2.63714	2.56047	2.51248	2.52775	2.76256	2.43578	2.34461	2.42013	2.55183	2.44633	2.30024	2.58617
TC0100000903.mm.1	1.88577	1.91003	1.96812	1.94518	1.98706	Gm26720	ENSMUST00000181260	predicted gene, 26720	1.88206	1.78516	1.74054	1.84822	2.17288	2.123	1.85971	1.78761	1.8698	1.82656	1.99149	2.08356	1.97088	2.07488	1.8935	1.99181	1.77328	1.99244	1.65581	2.0302	2.15478	2.15168	1.94285
TC0100000904.mm.1	1.89254	1.84349	1.8603	1.94658	1.99845	NONMMUT002034	NONMMUT002034	NA	1.95476	1.7121	1.91787	1.82965	2.04832	1.96556	1.81753	1.81247	1.77839	1.73373	1.92139	1.8336	1.95249	2.04529	1.84638	1.91987	2.0577	1.86365	2.00412	2.0834	1.97345	2.05798	1.87329
TC0100000905.mm.1	1.71742	1.7019	1.76875	1.72025	1.79361	NONMMUT002037	NONMMUT002037	NA	1.54269	1.71461	1.65656	1.98108	1.69219	1.74912	1.61008	1.71558	1.73281	1.71149	1.90529	1.66478	1.79344	1.7217	1.74266	1.77896	1.72062	1.6373	1.89073	1.79048	1.94594	1.77274	1.56817
TC0100000906.mm.1	1.55818	1.55171	1.67209	1.6455	1.62654	NONMMUT002038	NONMMUT002038	NA	1.5068	1.64486	1.53811	1.49184	1.60927	1.66762	1.47334	1.46195	1.60391	1.59093	1.55102	1.85507	1.69134	1.59076	1.5315	1.76852	1.75489	1.58185	1.55062	1.47919	1.67176	1.71427	1.71689
TC0100000907.mm.1	2.60781	2.68173	2.71237	2.71814	2.6105	NONMMUT002039	NONMMUT002039	NA	2.54361	2.65856	2.58329	2.57926	2.67433	2.74506	2.65312	2.68971	2.63901	2.73633	2.81769	2.61225	2.6832	2.78082	2.81584	2.61225	2.68565	2.69613	2.50944	2.82618	2.64793	2.56461	2.50434
TC0100000908.mm.1	2.71215	2.80346	2.83131	2.76026	2.79568	Olfr1413	NM_147037	olfactory receptor 1413	2.99054	2.60283	2.62772	2.72213	2.61753	2.91284	2.68478	3.0249	2.59131	2.65002	2.83398	2.74541	3.09583	2.84275	2.73445	2.61412	2.74458	2.86541	2.49224	2.91002	2.94419	2.80148	2.83044
TC0100000909.mm.1	3.02845	3.02032	3.04587	3.02337	3.026	Olfr1412	NM_146277	olfactory receptor 1412	3.12784	2.7834	3.04381	3.05528	3.13193	2.86558	3.21464	3.06084	2.94023	2.94542	3.18629	2.88066	3.17111	3.03216	3.02018	3.02569	3.06654	2.97228	2.87705	3.25392	3.02878	2.96948	3.00079
TC0100000910.mm.1	3.60821	3.66188	3.78626	3.71224	3.75062	Olfr1411	NM_146490	olfactory receptor 1411	3.74265	3.73564	3.68763	3.59362	3.28151	3.73542	3.59135	3.70359	3.61715	3.43767	3.96547	3.62036	4.12156	3.8146	3.67049	3.70787	3.69979	3.66847	3.68141	3.89292	3.82872	3.64344	3.70662
TC0100000911.mm.1	3.08476	3.04053	3.24915	3.15701	3.09965	Olfr1410	NM_146491	olfactory receptor 1410	3.11816	3.12936	3.05661	3.04068	3.07902	3.25555	3.04689	3.06489	2.7948	3.10678	3.44691	3.06684	3.37607	3.39134	3.19122	2.97751	3.19124	3.03372	3.14563	3.06797	3.09438	2.98878	3.20151
TC0100000912.mm.1	2.38089	2.2187	2.432	2.35224	2.37222	Olfr12	NM_206896	olfactory receptor 12	2.28191	2.53898	2.27997	2.40608	2.39752	2.14001	2.20843	2.30774	2.21862	2.3794	2.42113	2.26295	2.66453	2.35547	2.45385	2.2518	2.34626	2.35382	2.32455	2.44095	2.3297	2.38011	2.38579
TC0100000913.mm.1	1.74696	1.70941	1.76307	1.75318	1.72273	NONMMUT002050	NONMMUT002050	NA	1.74115	1.73538	1.84294	1.72879	1.68655	1.80732	1.69114	1.68693	1.65226	1.70648	1.64828	1.83883	1.85871	1.63942	1.84608	1.88225	1.79316	1.60499	1.70921	1.88535	1.58254	1.73829	1.69824
TC0100000914.mm.1	2.60865	2.60179	2.64876	2.66437	2.69039	NONMMUT002056	NONMMUT002056	NA	2.57998	2.36282	2.77112	2.76286	2.56647	2.6921	2.52086	2.65783	2.53638	2.56882	2.63096	2.59609	2.79916	2.93535	2.4237	2.72614	2.54707	2.68957	2.55414	2.85441	2.58684	2.85182	2.60476
TC0100000915.mm.1	2.29377	2.24786	2.24811	2.26734	2.26041	NONMMUT002058	NONMMUT002058	NA	2.23605	2.19065	2.25134	2.51945	2.27139	2.20475	2.30565	2.39055	2.09048	1.97998	2.36389	2.23765	2.41091	2.23741	2.40501	2.23862	2.20812	2.24756	2.17087	2.48707	2.11	2.4583	2.07581
TC0100000916.mm.1	5.77631	5.77342	5.78354	5.75934	5.76782	Gpc1	NM_016696	glypican 1	5.87246	5.94023	5.62463	5.65275	5.79146	5.76635	5.79589	5.84056	5.69089	5.72422	5.66634	5.83819	5.90542	5.72342	5.70694	5.85486	5.73693	5.77453	5.69586	5.93368	5.5502	5.97001	5.68937
TC0100000917.mm.1	4.04967	4.03826	4.2222	4.20273	4.16806	Mir149	NR_029559	microRNA 149	4.3914	3.95738	4.00379	4.06351	3.83227	4.07465	3.99504	4.26219	3.82114	3.98832	4.33807	4.19688	4.36552	4.33692	4.12754	4.21162	4.11625	4.22131	3.88333	4.22479	4.37104	4.16911	4.19201
TC0100000918.mm.1	2.3845	2.51161	2.62635	2.5023	2.53344	NONMMUT002062	NONMMUT002062	NA	2.34284	2.49633	2.33075	2.39119	2.36137	2.6785	2.38259	2.63354	2.35181	2.57298	2.61883	2.45814	2.85546	2.64584	2.53284	2.28515	2.497	2.55067	2.44622	2.6012	2.54754	2.49854	2.5737
TC0100000919.mm.1	3.3214	3.55637	3.50674	3.61532	3.53564	Dusp28	NM_175118	dual specificity phosphatase 28	3.62899	3.15315	3.32819	3.21393	3.28274	3.67858	3.53021	3.5558	3.46089	3.57134	3.52768	3.49462	3.43332	3.38354	3.41613	3.75784	3.99968	3.51941	3.77113	3.46889	3.67296	3.41137	3.35386
TC0100000920.mm.1	2.40047	2.30441	2.49554	2.334	2.25887	NONMMUT002064	NONMMUT002064	NA	2.51965	2.09344	2.62659	2.2788	2.48387	2.29079	2.31369	2.2857	2.32748	2.66274	2.43232	2.40501	2.48207	2.45167	2.34107	2.2888	2.44308	2.14538	2.12767	2.35188	2.36	2.26194	2.19289
TC0100000921.mm.1	6.37689	6.43343	6.35857	6.39854	6.28695	Rnpepl1	NM_181405	arginyl aminopeptidase (aminopeptidase B)-like 1	6.47535	6.32739	6.23486	6.38179	6.46507	6.45241	6.43393	6.4512	6.39619	6.41677	6.26928	6.37569	6.37254	6.38348	6.44025	6.36402	6.35461	6.45032	6.22397	6.50706	6.09201	6.27565	6.33605
TC0100000922.mm.1	4.6515	4.74198	4.75438	4.72482	4.73801	Capn10	NM_011796	calpain 10	4.70154	4.63851	4.6165	4.6734	4.62754	4.71411	4.75763	4.76279	4.7334	4.66789	4.8144	4.73409	4.80116	4.73521	4.75097	4.73398	4.68724	4.71668	4.69177	4.83871	4.72759	4.71792	4.71405
TC0100000923.mm.1	4.47355	4.29081	4.06068	3.96716	4.12611	Gpr35	NM_001104529	G protein-coupled receptor 35	3.95728	4.8054	5.14762	4.04609	4.41138	4.37463	4.27488	4.14889	4.36483	3.86108	4.06987	3.95342	4.35835	3.82967	3.78165	3.39837	4.10273	4.72339	4.06052	4.31006	4.09758	4.25963	3.90274
TC0100000924.mm.1	4.29143	4.34552	4.3092	4.23789	4.40485	Aqp12	NM_001159658	aquaporin 12	4.33985	4.21572	4.26043	4.27634	4.3648	4.44353	4.31485	4.28696	4.33675	4.11937	4.36079	4.26109	4.49554	4.24189	4.19596	4.19218	4.21033	4.34907	4.32074	4.52466	4.43264	4.36759	4.37862
TC0100000925.mm.1	3.73105	3.71736	3.82863	3.77375	3.78094	Agxt	NM_001276710	alanine-glyoxylate aminotransferase	3.76026	3.76421	3.77829	3.57421	3.77829	3.73649	3.60142	3.83966	3.69188	3.67982	3.88936	3.70882	4.03652	3.83735	3.80571	3.7375	3.70884	3.77933	3.68966	3.94745	3.85558	3.68783	3.72416
TC0100000926.mm.1	4.6497	4.62809	4.71957	4.71878	4.71973	E030010N08Rik	XM_001474855	RIKEN cDNA E030010N08 gene	4.76806	4.61592	4.68998	4.61807	4.55646	4.67487	4.62605	4.69278	4.51868	4.59998	4.73339	4.63296	4.91194	4.82129	4.67407	4.68222	4.72803	4.68827	4.62629	4.85755	4.78613	4.69414	4.63453
TC0100000927.mm.1	5.5057	5.69438	5.58864	5.51262	5.73408	Sned1	NM_172463	sushi, nidogen and EGF-like domains 1	5.6292	5.64243	5.4497	5.31688	5.4903	5.63581	5.86234	5.55783	5.72155	5.59749	5.43592	5.62274	5.69841	5.38439	5.66187	5.23562	5.43539	5.84585	5.49892	5.76659	5.80028	5.4535	6.15111
TC0100000928.mm.1	3.2555	3.29761	3.35238	3.18989	3.39987	NONMMUT002081	NONMMUT002081	NA	3.15125	3.18422	3.2958	3.17281	3.4734	3.15053	3.49116	3.24909	3.29966	3.4407	3.31809	3.41908	3.23164	3.07813	3.27688	2.99449	3.08841	3.51154	3.05463	3.51182	3.40931	3.18619	3.8374
TC0100000929.mm.1	7.71158	7.80706	7.824	7.76112	7.72787	Ppp1r7	NM_023200	protein phosphatase 1, regulatory (inhibitor) subunit 7	7.87899	7.6638	7.6106	7.76243	7.64209	7.85812	7.75064	7.80328	7.81621	7.8706	7.83464	7.84504	7.74571	7.72592	7.83586	7.86804	7.87967	7.49613	7.85271	7.77184	7.69009	7.75359	7.57115
TC0100000930.mm.1	1.37873	1.37156	1.3086	1.32123	1.32818	Mir6902	NR_105867	microRNA mir-6902	1.24245	1.32375	1.22954	1.71813	1.3798	1.32055	1.50928	1.49207	1.16434	1.59038	1.15488	1.37285	1.1163	1.29411	1.22826	1.39025	1.39183	1.30171	1.13594	1.29882	1.2216	1.58982	1.39473
TC0100000931.mm.1	2.4274	2.6311	2.56298	2.43894	2.38368	Mir6345	NR_105763	microRNA mir-6345	2.20104	2.39944	2.57033	2.56336	2.40285	2.36526	2.55442	2.64842	2.9563	2.36264	2.72865	2.40365	2.75697	2.38576	2.43165	2.67139	2.36312	2.34278	2.46901	2.25206	2.41979	2.41952	2.35804
TC0100000932.mm.1	2.82733	2.73757	2.80557	2.93687	2.89525	Gm26446	ENSMUST00000082455	predicted gene, 26446	2.98254	2.6809	2.92829	2.9035	2.64142	2.61275	2.72369	2.79394	2.8199	2.94279	2.90615	2.87188	2.50148	2.95966	3.1044	2.90948	2.90679	2.804	2.91267	3.05589	2.84145	3.01782	2.64844
TC0100000933.mm.1	3.87536	3.85964	3.95685	3.90968	3.94608	Ano7	NM_001271884	anoctamin 7	3.89006	3.85033	3.90577	3.82744	3.90317	3.90311	3.88353	3.90336	3.74855	3.80628	3.9934	3.84492	4.1828	3.97037	3.87893	3.90517	3.92577	3.86814	3.83114	4.08799	3.98773	3.93493	3.88863
TC0100000934.mm.1	7.53389	7.43124	7.35699	7.47834	7.45084	Gm17415	ENSMUST00000096427	predicted gene, 17415	7.43402	7.5161	7.70901	7.45324	7.55711	7.57375	7.43177	7.4499	7.26952	7.35298	7.44585	7.3888	7.24032	7.51122	7.40651	7.38856	7.53824	7.5472	7.46101	7.51724	7.48761	7.41656	7.37177
TC0100000935.mm.1	2.85122	2.8389	2.91635	2.8008	2.78106	NONMMUT002089	NONMMUT002089	NA	2.89624	2.7215	2.88052	2.62275	3.13508	2.88428	2.87759	2.84314	2.75058	2.95333	3.01291	2.84247	2.85666	2.81508	2.69039	2.8395	2.81543	2.84359	2.78482	2.77727	2.70692	2.78981	2.84647
TC0100000936.mm.1	8.70851	8.72127	8.75338	8.63489	8.71474	2-Sep	NM_001159717	septin 2	8.69501	8.65444	8.79651	8.72214	8.67444	8.6776	8.68336	8.69697	8.82717	8.78071	8.79028	8.7155	8.72705	8.72025	8.66352	8.55512	8.65543	8.58014	8.81278	8.57636	8.8311	8.70642	8.64703
TC0100000937.mm.1	5.87809	6.2234	5.9598	6.01495	5.93427	Farp2	NM_145519	FERM, RhoGEF and pleckstrin domain protein 2	6.07335	5.80709	5.50687	6.02151	5.98162	6.24783	6.17946	6.23235	6.23395	6.0762	5.93224	6.00288	5.82787	5.93991	6.0763	5.97414	5.97707	6.10732	6.07294	5.96622	5.68952	5.97785	5.96484
TC0100000938.mm.1	2.67061	3.01531	2.71092	2.77359	2.76017	NONMMUT002091	NONMMUT002091	NA	2.82167	2.84128	2.20614	2.62762	2.85636	2.70661	3.04037	3.1875	3.12675	2.65224	2.73214	2.66339	2.7959	2.65007	2.67099	2.9322	2.77165	2.84305	2.68131	2.74124	2.81627	2.48509	3.07696
TC0100000939.mm.1	6.91963	7.33693	7.10095	6.8996	7.03481	NONMMUT002092	NONMMUT002092	NA	7.15175	7.04837	6.28671	7.10224	7.00908	7.2194	7.3237	7.32505	7.47957	7.25004	7.20671	7.06395	6.88312	6.84858	7.03651	6.8251	6.76676	7.02108	7.05838	7.15167	6.68993	7.07311	7.20094
TC0100000940.mm.1	4.34065	4.22553	4.37535	4.44587	4.46232	NONMMUT002096	NONMMUT002096	NA	4.42454	4.2542	4.52642	4.20116	4.29692	4.30343	4.1872	4.32891	4.08257	4.19993	4.41308	4.22099	4.66741	4.57295	4.34438	4.60979	4.3721	4.33011	4.28139	4.77926	4.49928	4.35851	4.39316
TC0100000941.mm.1	3.56107	3.52473	3.54148	3.68278	3.59326	NONMMUT002097	NONMMUT002097	NA	3.52382	3.51866	3.52967	3.70838	3.52484	3.46194	3.54914	3.5327	3.55513	3.56209	3.70717	3.43619	3.46049	3.69927	3.62195	3.73714	3.73941	3.61613	3.56761	3.55733	3.5322	3.60304	3.70611
TC0100000942.mm.1	5.27386	5.22836	5.2898	5.27183	5.41477	Bok	NM_016778	BCL2-related ovarian killer	5.37952	5.29058	5.35975	5.08997	5.24945	5.22563	5.24705	5.33637	5.1044	5.09239	5.31377	5.24657	5.50645	5.27529	5.27364	5.2456	5.26217	5.30245	5.27129	5.53684	5.45378	5.39911	5.41283
TC0100000943.mm.1	4.00872	3.94334	3.99208	4.10051	4.08809	AK143968	uc007cei.1	NA	4.18578	3.99734	4.01291	3.94519	3.9024	4.03224	3.99628	3.79129	3.95355	4.06429	3.82168	4.15563	3.92671	4.24205	4.09456	4.13104	3.97723	4.05765	3.88094	4.2104	4.1603	4.11365	4.07513
TC0100000944.mm.1	6.22277	6.40247	6.27316	6.35415	6.2674	Atg4b	NM_174874	autophagy related 4B, cysteine peptidase	6.36023	6.21041	6.06423	6.20226	6.27671	6.47762	6.38161	6.3397	6.41095	6.40041	6.22372	6.23386	6.23464	6.21359	6.43614	6.4523	6.31481	6.3539	6.39054	6.27647	6.19533	6.20206	6.27262
TC0100000945.mm.1	2.29748	2.38229	2.47841	2.34906	2.42831	NONMMUT002099	NONMMUT002099	NA	2.11654	2.24317	2.36859	2.36473	2.39435	2.33382	2.37532	2.52486	2.29517	2.38863	2.40922	2.5983	2.51749	2.39144	2.31023	2.31846	2.44147	2.28371	2.51855	2.52053	2.37925	2.25746	2.46575
TC0100000946.mm.1	6.04001	6.19388	6.12464	6.05689	6.03155	Ing5	NM_025454	inhibitor of growth family, member 5	6.04163	5.91579	6.023	6.08701	6.13263	6.08015	6.15288	6.17637	6.36611	6.18873	6.03703	6.10265	6.17013	6.04613	6.11451	6.02057	6.13814	5.96511	6.1432	6.06053	5.98563	5.99652	5.97189
TC0100000947.mm.1	4.89722	4.96179	4.9646	4.92906	4.98784	D2hgdh	NM_178882	D-2-hydroxyglutarate dehydrogenase	5.03951	4.89135	4.73072	4.9934	4.83112	4.95882	4.9121	4.96955	5.00671	5.04533	4.92364	4.97438	4.91503	4.85661	4.96158	4.97254	4.9971	4.85747	4.98577	4.98456	4.9033	4.93035	5.1352
TC0100000948.mm.1	3.83572	3.67353	3.8477	3.81535	3.75741	Gal3st2	NM_199366	galactose-3-O-sulfotransferase 2	3.81218	3.84556	3.78698	3.79468	3.93918	3.80675	3.72697	3.53506	3.62533	3.81241	3.87526	3.80961	3.8935	3.77019	3.79401	3.88329	4.00529	3.62395	3.64244	3.97093	3.85069	3.6688	3.6542
TC0100000949.mm.1	4.29001	4.23277	4.37957	4.29448	4.13248	Gm9994	NM_001205249	predicted gene 9994	4.41841	4.3486	4.26567	4.23134	4.18603	4.31557	4.28058	4.20334	4.1316	4.3275	4.42843	4.34318	4.41917	4.29878	4.29062	4.28812	4.49206	4.10281	3.97529	4.43657	4.04714	4.14332	4.06009
TC0100000950.mm.1	5.32117	5.29229	5.45275	5.36236	5.47713	Gm7889	XM_980899	predicted gene 7889	5.46322	5.23842	5.2679	5.46752	5.16878	5.40663	5.29586	5.26834	5.19834	5.40237	5.51169	5.42978	5.46715	5.36358	5.3742	5.34771	5.38856	5.33773	5.54324	5.44519	5.26993	5.48162	5.64566
TC0100000951.mm.1	3.7549	3.67063	3.79547	3.81646	3.72457	Gm6086	NM_001039219	predicted gene 6086	3.85277	3.72914	3.71875	3.72514	3.74869	3.77123	3.70668	3.55194	3.65269	3.78034	3.82225	3.70212	3.87718	3.93676	3.78214	3.85956	3.74709	3.75674	3.70065	3.84305	3.65888	3.70627	3.71398
TC0100000952.mm.1	1.894	1.79806	2.03238	1.90126	1.87476	NONMMUT002103	NONMMUT002103	NA	2.14025	1.74687	1.85784	1.86757	1.85746	1.87139	1.73848	1.71847	1.8639	2.01802	1.91094	2.00029	2.20028	2.05367	1.98846	1.80887	1.97106	1.68424	2.00888	1.83569	1.68127	1.98373	1.86422
TC0100000953.mm.1	2.92673	2.92974	2.93303	2.90173	2.93358	KnowTID_00000115	KnowTID_00000115	NA	3.09976	2.91417	2.80026	2.93013	2.8893	2.96677	3.08513	2.8563	2.81075	2.97632	2.89898	2.71005	3.14677	2.86114	2.741	3.07243	2.9993	2.8348	2.75535	3.05432	2.98691	2.86632	3.00502
TC0100000954.mm.1	4.16167	4.10586	4.17289	4.14304	4.14946	Neu4	NM_173772	sialidase 4	4.19746	4.28583	4.22614	4.0843	4.01462	4.16476	4.1583	4.17222	3.92817	4.10207	4.2131	3.91657	4.45981	4.27697	4.09915	3.95372	4.17618	4.20918	4.00691	4.38023	3.99711	4.19481	4.16822
TC0100000955.mm.1	6.94575	6.70967	6.6244	6.72324	6.74695	AB353040	uc029qse.1	NA	6.31701	7.22274	6.97564	6.94104	7.27231	6.32834	7.14247	6.47139	6.89648	6.57832	6.80209	6.5744	6.5428	6.9237	6.7504	6.56799	6.675	6.69911	6.63095	6.7238	6.85793	6.56522	6.95683
TC0100000956.mm.1	1.27307	1.3216	1.35714	1.35689	1.32477	4930440C22Rik	NR_040473	RIKEN cDNA 4930440C22 gene	1.22361	1.24532	1.28038	1.30572	1.31033	1.30445	1.38762	1.38249	1.21184	1.33179	1.27252	1.52295	1.3013	1.39479	1.32024	1.34528	1.33949	1.38463	1.2511	1.40586	1.40111	1.29361	1.27218
TC0100000957.mm.1	6.34826	6.15989	6.25064	6.14616	6.24218	Fam174a	NM_026321	family with sequence similarity 174, member A	6.1618	6.1256	6.74682	6.39284	6.31425	6.13735	6.07461	5.99371	6.43391	6.30054	6.27488	6.23465	6.19247	6.21403	6.13835	6.15142	6.16545	6.06154	6.29558	5.79533	6.74267	6.19298	6.18432
TC0100000958.mm.1	1.59855	1.5383	1.70888	1.57594	1.64672	KnowTID_00000117	KnowTID_00000117	NA	1.53626	1.5305	1.60323	1.71496	1.60778	1.43994	1.65286	1.52917	1.53122	1.81893	1.66536	1.42658	1.92463	1.60937	1.5208	1.50487	1.60049	1.64419	1.57326	1.59747	1.72358	1.73102	1.60828
TC0100000959.mm.1	9.43797	9.27592	9.19677	9.3904	9.3315	Gm15427	ENSMUST00000109141	predicted pseudogene 15427	9.31033	9.42018	9.66999	9.3423	9.44703	9.37688	9.23987	9.34298	9.14393	9.18879	9.26341	9.24373	9.09112	9.43958	9.338	9.31204	9.46303	9.39934	9.4247	9.2871	9.43548	9.28858	9.22165
TC0100000960.mm.1	1.46594	1.46337	1.46212	1.49896	1.53012	NONMMUT002117	NONMMUT002117	NA	1.47495	1.36008	1.60753	1.44866	1.43849	1.37342	1.58385	1.53772	1.35849	1.35148	1.45249	1.50036	1.54414	1.57943	1.51174	1.56196	1.53673	1.30493	1.59958	1.57788	1.55904	1.42182	1.49227
TC0100000961.mm.1	1.35642	1.23703	1.28702	1.26847	1.3364	NONMMUT002119	NONMMUT002119	NA	1.30726	1.32986	1.31561	1.37116	1.45823	1.23422	1.32494	1.21465	1.17433	1.34744	1.37734	1.20496	1.21834	1.28084	1.17436	1.45453	1.16472	1.26789	1.36272	1.42133	1.2896	1.39908	1.20928
TC0100000962.mm.1	5.12867	5.01338	4.93508	5.12745	5.18134	Gm22917	ENSMUST00000180116	predicted gene, 22917	5.09543	5.18546	5.15083	5.03184	5.17978	5.02215	5.29987	4.97563	4.75586	4.75963	5.16296	4.97663	4.84108	5.11142	5.13186	5.20993	5.02621	5.15783	5.20367	5.06387	5.2995	5.04321	5.29643
TC0100000963.mm.1	1.55894	1.51609	1.70923	1.56932	1.52569	KnowTID_00000118	KnowTID_00000118	NA	1.5275	1.45628	1.70795	1.62102	1.48193	1.39181	1.48995	1.6476	1.53499	1.61434	1.70752	1.80363	1.71142	1.70274	1.5709	1.42872	1.51856	1.62568	1.55728	1.49613	1.43459	1.65835	1.48213
TC0100000964.mm.1	4.59328	4.55814	4.58915	4.52913	4.66594	Gm26245	ENSMUST00000178491	predicted gene, 26245	4.47558	4.51896	4.77047	4.63584	4.56553	4.62229	4.62303	4.54751	4.43973	4.52816	4.67001	4.58913	4.56931	4.48822	4.31038	4.47083	4.64822	4.72797	4.47556	4.58048	4.90367	4.5883	4.7817
TC0100000965.mm.1	2.04484	1.8886	2.14135	2.07008	2.01205	Gm26078	ENSMUST00000104067	predicted gene, 26078	1.95489	1.96847	2.29707	2.31436	1.68939	1.95201	2.04402	1.86788	1.6905	2.22457	2.07361	2.31877	1.94847	2.10105	2.01488	1.97455	1.98087	2.27907	1.90686	2.00182	2.16408	1.96741	2.02006
TC0100000966.mm.1	1.74428	1.60777	1.74085	1.72404	1.74644	Gm5101	ENSMUST00000181489	predicted gene 5101	1.73398	1.71872	1.72585	1.82801	1.71481	1.70762	1.631	1.50635	1.58611	1.63932	1.56943	1.69956	2.05511	1.73194	1.77462	1.72394	1.61906	1.77063	1.74229	1.77459	1.79581	1.66377	1.75572
TC0100000967.mm.1	8.53841	8.38856	8.41019	8.29872	8.4135	Gm6430	ENSMUST00000054664	predicted gene 6430	8.37114	8.51338	8.74705	8.47449	8.58597	8.34449	8.35679	8.31845	8.53452	8.34043	8.35362	8.35783	8.58887	8.38404	8.23272	8.07166	8.31714	8.48804	8.41576	8.17547	8.64006	8.38563	8.45057
TC0100000968.mm.1	1.34157	1.32644	1.3747	1.30955	1.29948	Gm7133	XM_981711	predicted gene 7133	1.44056	1.31271	1.30563	1.33233	1.31661	1.36431	1.30199	1.40142	1.23803	1.42377	1.29548	1.3373	1.44226	1.29874	1.26614	1.32311	1.33997	1.31981	1.27559	1.31567	1.33082	1.28043	1.29487
TC0100000969.mm.1	1.40046	1.31011	1.42888	1.39573	1.3516	Gm7135	XM_981747	predicted gene 7135	1.38965	1.43917	1.37623	1.46104	1.33623	1.41366	1.29884	1.31537	1.21257	1.40519	1.40562	1.42633	1.47836	1.46318	1.44439	1.3103	1.35833	1.40244	1.33976	1.33736	1.2845	1.40279	1.39359
TC0100000970.mm.1	2.22521	2.1901	2.10796	2.23569	2.21713	NONMMUT002136	NONMMUT002136	NA	2.04698	2.23743	2.30719	2.31534	2.21913	2.12352	2.23259	2.16289	2.24141	2.14716	2.18501	2.04682	2.05285	2.18702	2.37885	2.23111	2.19176	2.18973	2.17826	2.23616	2.07477	2.20972	2.38674
TC0100000971.mm.1	4.21687	4.25185	4.13479	4.10105	4.12788	Gin1	NM_026250	gypsy retrotransposon integrase 1	4.22348	4.10389	4.33016	4.17729	4.24953	4.23122	4.33635	4.18203	4.25781	4.23158	4.14441	4.18599	3.97718	4.00663	4.20535	4.08707	4.22503	3.98115	4.29716	3.89798	4.34298	3.97027	4.13101
TC0100000972.mm.1	2.41802	2.55861	2.64837	2.47535	2.55157	Gm25413	ENSMUST00000158544	predicted gene, 25413	2.29989	2.23892	2.49429	2.49129	2.56573	2.50619	2.61161	2.57727	2.53937	2.75537	2.47623	2.7378	2.62409	2.41399	2.66264	2.55028	2.3846	2.36523	2.37439	2.32405	2.71336	2.79608	2.55
TC0100000973.mm.1	5.40316	5.24548	5.3452	5.3176	5.47224	Gm24465	ENSMUST00000178398	predicted gene, 24465	5.24616	5.35354	5.55736	5.61531	5.24345	5.40255	5.20326	5.2782	5.09792	5.18924	5.4547	5.38748	5.34938	5.22806	5.12379	5.20913	5.43106	5.59597	5.29104	5.44087	5.6759	5.51408	5.43931
TC0100000974.mm.1	2.27214	2.33061	2.30097	2.07499	2.16136	1810006J02Rik	NR_040439	RIKEN cDNA 1810006J02 gene	2.21494	2.08933	2.39629	2.45346	2.20669	2.14483	2.31046	2.44124	2.42593	2.51853	2.40541	2.19974	2.0802	2.0137	2.34032	2.09695	2.0036	1.92035	2.31539	2.03029	2.29382	1.95857	2.20875
TC0100000975.mm.1	2.30171	2.33036	2.31902	2.32805	2.32823	NONMMUT002159	NONMMUT002159	NA	2.27018	2.2206	2.32422	2.22808	2.46545	2.19092	2.39559	2.34329	2.39162	2.37863	2.24351	2.26513	2.38882	2.34198	2.16294	2.26908	2.31045	2.55579	2.22866	2.39205	2.3656	2.2851	2.36974
TC0100000976.mm.1	2.21321	2.25464	2.42089	2.28823	2.3337	Gm7952	ENSMUST00000180540	predicted gene 7952	2.52299	2.13377	2.08132	2.04919	2.2788	2.40466	2.26518	2.07038	2.27832	2.46929	2.39608	2.52474	2.29343	2.212	2.29044	2.13956	2.4174	2.38176	2.34229	2.48661	2.32061	2.45847	2.06053
TC0100000977.mm.1	1.34825	1.36176	1.38343	1.34413	1.35378	Slco6d1	NM_001164233	solute carrier organic anion transporter family, member 6d1	1.35507	1.26497	1.44626	1.34165	1.33329	1.37524	1.31723	1.33346	1.42111	1.34383	1.33545	1.37379	1.48067	1.28604	1.32853	1.3126	1.48146	1.31203	1.42752	1.28994	1.3855	1.34017	1.32578
TC0100000978.mm.1	8.19335	8.34009	8.54652	8.20309	7.97646	Gm3555	ENSMUST00000160287	predicted pseudogene 3555	8.39711	8.32752	7.71784	8.24248	8.28181	8.41911	8.26187	8.38857	8.29083	8.63913	8.49572	8.56085	8.49037	8.42579	8.07095	8.03405	8.24737	8.23728	8.2559	8.16342	7.3357	8.1391	7.98818
TC0100000979.mm.1	3.91594	3.82047	3.77842	3.93181	3.88327	Gm26134	ENSMUST00000178484	predicted gene, 26134	3.93995	3.86604	4.02163	3.85373	3.89833	3.82979	3.96804	3.6901	3.79396	3.72335	3.89273	3.65184	3.84576	3.90214	3.88733	3.95041	3.99828	3.92089	3.86174	3.92143	3.96657	3.77756	3.88903
TC0100000980.mm.1	2.53599	2.32626	2.33792	2.48026	2.38103	KnowTID_00000122	KnowTID_00000122	NA	2.38114	2.45631	2.74361	2.54167	2.55723	2.2562	2.52728	2.15612	2.36545	2.41022	2.33867	2.21574	2.38704	2.55764	2.52889	2.63929	2.48699	2.18848	2.36941	2.34693	2.45059	2.41901	2.31918
TC0100000981.mm.1	1.0865	1.07846	1.02087	1.05289	1.05422	Gm23434	ENSMUST00000157179	predicted gene, 23434	1.03752	1.07344	1.09639	1.25023	0.974916	0.960335	0.976491	1.30474	1.07229	1.01046	0.994424	1.09184	0.986764	1.01093	1.02861	1.01645	1.15836	1.0501	1.00625	1.13423	1.06064	1.00351	1.06649
TC0100000982.mm.1	6.38823	6.24903	6.28519	6.32028	6.29426	KnowTID_00000123	KnowTID_00000123	NA	6.1943	6.73735	6.46412	6.36315	6.18223	6.21997	6.44375	6.16181	6.1706	6.04307	6.54669	6.32569	6.22533	6.5264	6.24837	6.32334	6.24689	6.25642	6.27569	6.22867	6.35874	6.18365	6.42453
TC0100000983.mm.1	6.86886	6.65327	6.57232	6.65303	6.70527	AB353040	uc029qsj.1	NA	6.25752	7.12572	6.91153	6.87412	7.17542	6.30518	7.10646	6.40564	6.79578	6.50161	6.74368	6.55469	6.48931	6.89607	6.69777	6.53625	6.61185	6.52321	6.62489	6.68884	6.79937	6.51122	6.90202
TC0100000984.mm.1	5.14302	4.9849	5.08089	4.94893	5.07044	Gm20253	XR_106078	predicted gene, 20253	5.01651	5.1882	5.21814	5.20156	5.09068	4.82375	5.06267	5.00156	5.05163	5.12276	5.09898	5.25701	4.8448	4.97881	4.88287	4.78886	5.01161	5.08249	5.04294	4.62269	5.31522	5.2195	5.15182
TC0100000985.mm.1	1.73971	1.75836	1.74031	1.78712	1.78458	Cntnap5b	NM_172851	contactin associated protein-like 5B	1.73448	1.64561	1.82563	1.68519	1.80765	1.76799	1.72855	1.77991	1.75698	1.6588	1.78895	1.74363	1.76985	1.74036	1.76174	1.85924	1.8042	1.77006	1.74351	1.90832	1.76675	1.77883	1.72548
TC0100000986.mm.1	1.50076	1.61173	1.53138	1.48232	1.56345	NONMMUT002173	NONMMUT002173	NA	1.43249	1.49233	1.43375	1.55591	1.5893	1.611	1.68829	1.66787	1.47976	1.48421	1.44721	1.67717	1.51693	1.51517	1.69414	1.37865	1.49302	1.33062	1.31407	1.79891	1.91563	1.29336	1.49525
TC0100000987.mm.1	1.07859	1.17562	1.1186	1.07583	1.11268	NONMMUT002174	NONMMUT002174	NA	1.13406	0.913433	1.12008	1.05899	1.1664	1.16899	1.08564	1.23062	1.21724	1.14274	1.06532	1.03611	1.23023	1.11115	1.09755	1.03226	1.11479	1.0234	1.16958	1.13114	1.10862	1.13827	1.01577
TC0100000988.mm.1	5.56527	5.3245	5.24641	5.56819	5.55096	Gm25537	ENSMUST00000103851	predicted gene, 25537	5.54369	5.51667	5.76201	5.5754	5.42858	5.25738	5.53014	5.33778	5.17272	5.14203	5.43694	5.13016	5.27649	5.52154	5.55479	5.54589	5.62629	5.59246	5.52163	5.57791	5.82025	5.29079	5.54419
TC0100000989.mm.1	1.55532	1.59097	1.55825	1.52682	1.51411	Gm20268	NR_037989	predicted gene, 20268	1.57893	1.51646	1.54205	1.61915	1.52001	1.53724	1.61808	1.51722	1.69132	1.44608	1.69411	1.44982	1.64298	1.53107	1.59006	1.51826	1.51144	1.4833	1.64291	1.49037	1.53388	1.43525	1.46814
TC0100000990.mm.1	2.10528	2.15633	2.16472	2.16067	2.13563	NONMMUT002181	NONMMUT002181	NA	2.09486	2.07291	2.04333	2.10563	2.20966	2.19028	2.18661	2.23413	2.01428	2.08954	2.08154	2.16512	2.32268	2.11993	2.28217	2.15887	2.14565	2.09671	2.07816	2.45252	2.09158	1.94482	2.11108
TC0100000991.mm.1	1.14799	1.17448	1.17603	1.17892	1.12945	NONMMUT002183	NONMMUT002183	NA	1.28981	1.17243	1.07567	1.01371	1.18835	1.22689	1.09955	1.14524	1.22626	1.33824	1.02637	1.17807	1.16146	1.42901	0.996063	1.111	1.10449	1.25404	1.07861	1.2078	1.04686	1.07497	1.23899
TC0100000992.mm.1	1.21362	1.09755	1.16196	1.18521	1.11867	KnowTID_00000125	KnowTID_00000125	NA	1.21843	1.08574	1.20017	1.40487	1.1589	1.19136	0.929687	1.20166	1.06748	1.09179	1.08371	1.28339	1.18895	1.14319	1.26175	1.07503	1.25237	1.19369	1.17899	1.18499	1.1776	1.03087	1.02088
TC0100000993.mm.1	1.41908	1.29109	1.27794	1.23401	1.33616	KnowTID_00000126	KnowTID_00000126	NA	1.49764	1.35772	1.34196	1.48369	1.41439	1.27085	1.31993	1.2594	1.31418	1.2178	1.41535	1.1385	1.3401	1.16052	1.28614	1.31252	1.20756	1.20334	1.46517	1.21663	1.42609	1.30016	1.27274
TC0100000994.mm.1	8.88489	8.24826	8.36852	8.90199	8.84296	NONMMUT002191	NONMMUT002191	NA	8.77527	8.97328	8.97536	8.9941	8.70646	8.17952	8.53982	8.17522	8.09846	8.12063	8.66545	8.23879	8.44921	9.11661	8.79324	8.846	8.80895	8.94513	9.06695	8.60941	8.86257	8.82182	8.85406
TC0100000995.mm.1	2.51967	2.35593	2.30909	2.39045	2.37882	Gm23537	ENSMUST00000157536	predicted gene, 23537	2.52238	2.54266	2.5811	2.5297	2.4225	2.42849	2.38163	2.32932	2.2843	2.1838	2.38426	2.49154	2.17675	2.44554	2.32908	2.41725	2.35693	2.40346	2.31875	2.56765	2.39991	2.43663	2.17114
TC0100000997.mm.1	6.78801	6.76116	6.5971	6.62451	6.66661	AB335790	uc029qso.1	NA	6.21553	6.92057	7.04519	6.82393	6.93485	6.48338	7.12541	7.02207	6.41377	6.45204	6.72282	6.52426	6.68929	7.07385	6.59505	6.47876	6.4186	6.55629	6.741	7.12384	6.3359	6.46381	6.6685
TC0100000998.mm.1	8.63033	8.66414	8.75945	8.71689	8.69038	Gm25003	ENSMUST00000117011	predicted gene, 25003	8.52285	8.71378	8.60144	8.6253	8.68828	8.68132	8.73261	8.67679	8.56584	8.52022	8.92828	8.73828	8.851	8.81993	8.66849	8.82817	8.70392	8.56396	8.59274	8.81033	8.82351	8.52152	8.70377
TC0100000999.mm.1	2.05204	2.04233	2.1578	2.15441	2.13654	Cdh20	NM_011800	cadherin 20	2.0496	2.03032	2.16799	1.98577	2.02651	2.02012	2.01378	2.11042	2.025	2.03138	2.10507	2.15078	2.34397	2.17633	2.0512	2.25276	2.07382	2.21791	2.00173	2.23401	2.21266	2.15107	2.08322
TC0100001000.mm.1	1.30347	1.32218	1.37679	1.36747	1.26284	NONMMUT002194	NONMMUT002194	NA	1.34082	1.18252	1.31906	1.32623	1.34874	1.19093	1.38114	1.38075	1.33589	1.41526	1.38534	1.38171	1.32486	1.37031	1.18127	1.64292	1.35361	1.28925	1.17986	1.35646	1.17103	1.3238	1.28303
TC0100001001.mm.1	1.23142	1.16806	1.21261	1.26864	1.22962	NONMMUT002197	NONMMUT002197	NA	1.1629	1.24106	1.2246	1.24769	1.28085	1.12538	1.20623	1.15703	1.18361	1.19492	1.21013	1.23665	1.20875	1.24081	1.27651	1.39386	1.31596	1.11607	1.20799	1.23419	1.23026	1.23753	1.23814
TC0100001002.mm.1	1.88348	1.80686	1.9499	1.99562	1.89905	NONMMUT002199	NONMMUT002199	NA	1.85383	1.8144	1.89963	1.76115	2.08839	1.71977	1.88419	1.83403	1.78944	1.96571	1.71938	2.06838	2.04612	1.80087	1.86244	2.01244	2.36092	1.94143	1.71945	2.23747	1.98582	1.83499	1.71752
TC0100001003.mm.1	1.0991	1.15792	1.14152	1.12539	1.11021	NONMMUT002201	NONMMUT002201	NA	1.02811	1.08377	1.18329	1.08776	1.11254	1.1505	1.21831	1.13371	1.12917	1.32933	1.07902	1.1249	1.03282	1.09855	1.01172	1.12746	1.26909	1.12011	1.12177	1.08301	1.21742	0.980682	1.14817
TC0100001004.mm.1	2.28492	2.20609	2.25603	2.29741	2.30862	Gm17634	XR_106080	predicted gene, 17634	2.39761	2.23179	2.18367	2.23034	2.38119	2.26281	2.22461	2.14254	2.19438	2.25964	2.25277	2.2484	2.26331	2.23417	2.22772	2.33171	2.30328	2.39017	2.24547	2.38481	2.24837	2.38002	2.28442
TC0100001005.mm.1	8.96247	8.83589	8.77698	8.66763	8.85726	Gm3608	ENSMUST00000086725	predicted gene 3608	8.71462	9.07705	9.30201	8.79144	8.92721	8.76715	8.81427	8.7977	8.96443	8.80828	8.76431	8.79108	8.74426	8.583	8.69591	8.51692	8.70286	8.83944	8.86522	8.66598	9.08718	8.8681	8.79981
TC0100001006.mm.1	8.79884	8.67228	8.59164	8.69047	8.72443	Gm22426	ENSMUST00000103811	predicted gene, 22426	8.67688	8.70913	9.03354	8.61502	8.95962	8.74854	8.54551	8.80216	8.5929	8.57338	8.67136	8.56025	8.56158	8.63194	8.70642	8.66446	8.72489	8.72462	8.67286	8.76436	8.9893	8.61978	8.57585
TC0100001007.mm.1	1.19098	1.27344	1.26653	1.20738	1.27013	NONMMUT002208	NONMMUT002208	NA	1.02727	1.24474	1.29241	1.17875	1.21171	1.29959	1.19395	1.29935	1.30089	1.33867	1.42965	1.10772	1.19008	1.19769	1.13515	1.22956	1.37079	1.10371	1.29537	1.27482	1.26237	1.26972	1.24836
TC0100001008.mm.1	5.95558	5.94155	5.89738	5.89825	5.79379	2310035C23Rik	NM_029349	RIKEN cDNA 2310035C23 gene	5.70249	6.10359	5.97909	6.0097	5.98305	5.8326	5.96341	5.89379	6.07639	5.92323	5.94571	5.89833	5.82224	5.86884	5.90408	6.03612	5.8782	5.80402	5.88716	5.59142	5.80398	5.75716	5.92923
TC0100001009.mm.1	3.41838	3.40672	3.29009	3.20103	3.30249	NONMMUT002210	NONMMUT002210	NA	3.00152	3.57408	3.35263	3.49204	3.67165	3.17648	3.42371	3.26477	3.76192	3.28999	3.20669	3.51243	3.15126	3.25983	3.21413	3.08229	3.19314	3.25579	3.24056	3.20575	3.10134	3.40973	3.55507
TC0100001010.mm.1	7.74173	7.96655	7.78794	7.80482	7.93383	Gm10193	XM_001478111	predicted gene 10193	7.86497	7.66844	7.91126	7.63864	7.62536	8.00203	7.93732	7.89199	8.03484	7.9115	7.74689	7.86425	7.62914	7.77826	7.81892	7.69105	7.87164	7.86423	7.83539	7.80501	8.33029	7.89038	7.80807
TC0100001011.mm.1	6.28107	6.28541	6.23859	6.24872	5.91707	Tnfrsf11a	NM_009399	tumor necrosis factor receptor superfamily, member 11a, NFKB activator	6.23348	6.42145	6.20146	6.17666	6.37229	6.24514	6.21798	6.45841	6.22011	6.30383	6.19102	6.20295	6.25655	6.17911	6.29826	6.16956	6.25915	6.33752	6.16992	6.04474	5.49887	5.97042	5.90142
TC0100001012.mm.1	1.8507	1.83281	1.80863	1.87576	1.86669	NONMMUT002213	NONMMUT002213	NA	2.00694	1.79734	1.68107	1.89459	1.87357	1.79931	1.90755	1.85434	1.77004	1.70596	1.93991	1.8632	1.72543	1.95072	1.81845	1.91248	1.88166	1.81552	2.34587	1.86165	1.5801	1.77029	1.77556
TC0100001013.mm.1	1.42556	1.44583	1.5254	1.50428	1.54238	NONMMUT002214	NONMMUT002214	NA	1.64799	1.44345	1.41522	1.3291	1.29206	1.63909	1.35313	1.47185	1.31923	1.43423	1.48969	1.66907	1.50861	1.6317	1.48564	1.37511	1.50729	1.52166	1.49288	1.63784	1.57014	1.55819	1.45287
TC0100001014.mm.1	2.10555	2.11959	2.21504	2.10485	2.26818	Gm26214	ENSMUST00000158581	predicted gene, 26214	1.87712	2.13895	2.25145	2.22623	2.034	2.31832	2.09171	1.9584	2.10992	2.26958	2.21224	2.11613	2.26221	2.12228	2.02232	2.14102	2.23954	1.99907	2.10336	2.19793	2.63052	2.33161	2.07746
TC0100001015.mm.1	4.20713	4.15337	4.23369	4.25776	4.23255	NONMMUT002217	NONMMUT002217	NA	4.24502	4.1636	4.26587	4.23908	4.12208	4.24506	4.20767	4.10462	4.05612	4.00319	4.41732	4.09119	4.42307	4.24983	4.14173	4.25453	4.24735	4.39536	4.07671	4.2802	4.24153	4.37041	4.19389
TC0100001016.mm.1	5.97823	5.96805	5.90706	5.90441	5.8245	Zcchc2	NM_001122675	zinc finger, CCHC domain containing 2	5.9168	6.03998	5.91631	6.08299	5.93506	5.91265	6.07824	5.82723	6.0541	5.98008	5.85526	5.9489	5.84399	5.81197	5.85739	5.74956	5.85879	6.24436	5.86927	5.87973	5.55943	5.89179	5.92228
TC0100001017.mm.1	2.10236	2.18394	2.05706	2.14638	2.18625	Gm26509	ENSMUST00000180947	predicted gene, 26509	2.18334	2.13787	2.00413	2.03088	2.15559	2.14022	1.98648	2.44989	2.15917	2.1493	1.92506	2.01754	2.13633	2.0956	1.91482	2.31021	2.33525	2.07604	2.06688	2.26311	2.23774	2.09837	2.26516
TC0100001018.mm.1	6.14316	6.13474	6.23962	6.14389	6.02168	Phlpp1	NM_133821	PH domain and leucine rich repeat protein phosphatase 1	6.20653	6.23852	5.95462	6.20235	6.1138	6.09395	6.11833	6.13019	6.19649	6.30231	6.16674	6.31066	6.17876	6.17279	6.12406	6.07268	6.14893	6.20101	6.14619	6.10936	5.62971	6.18864	6.0345
TC0100001019.mm.1	3.43029	3.25657	3.21908	3.2368	3.17795	NONMMUT002225	NONMMUT002225	NA	3.18258	3.53193	3.47007	3.49325	3.47365	3.14581	3.26405	3.30547	3.31096	3.1204	3.32548	3.23776	3.19269	3.41053	3.32531	3.27093	3.01154	3.16568	3.12019	3.14446	2.9883	3.16938	3.46742
TC0100001020.mm.1	3.43433	3.38516	3.1668	3.15044	3.07948	NONMMUT002226	NONMMUT002226	NA	3.35505	3.52037	3.59515	3.57948	3.12161	3.1805	3.20996	3.53446	3.6157	3.0735	3.30002	3.21188	3.08182	3.15148	3.14497	3.13942	3.25807	3.05827	3.21974	2.99372	2.72982	2.99302	3.46109
TC0100001021.mm.1	1.88724	1.83829	1.93548	1.80559	1.90655	NONMMUT002229	NONMMUT002229	NA	1.82661	2.03451	1.83366	1.97499	1.76641	1.96126	1.81402	1.91326	1.6646	1.85321	1.97863	1.73772	2.17234	1.89642	1.81456	1.70533	1.77082	1.84083	1.92899	2.0091	1.94283	1.98083	1.67101
TC0100001022.mm.1	3.14122	3.08898	3.33305	3.20256	3.13017	D630008O14Rik	ENSMUST00000144260	RIKEN cDNA D630008O14 gene	3.09633	3.17138	3.01875	3.20871	3.21092	2.95955	3.07102	3.09876	3.22659	3.41035	3.32025	3.52716	3.07445	3.32506	3.16853	3.22661	3.11143	3.18114	3.30963	3.07273	3.06904	3.11009	3.08937
TC0100001023.mm.1	1.67213	1.6753	1.65951	1.56279	1.62186	KnowTID_00000127	KnowTID_00000127	NA	1.63887	1.67525	1.60403	1.6465	1.79599	1.44995	1.73314	1.88546	1.63264	1.63814	1.60452	1.59291	1.80246	1.62326	1.59465	1.4354	1.56096	1.59967	1.71121	1.73719	1.48978	1.55127	1.61984
TC0100001024.mm.1	1.47098	1.47636	1.56903	1.50415	1.52074	Serpinb5	NM_009257	serine (or cysteine) peptidase inhibitor, clade B, member 5	1.4987	1.51933	1.48009	1.5339	1.32286	1.44925	1.54944	1.4647	1.44203	1.62089	1.5483	1.56787	1.53907	1.38427	1.4785	1.48655	1.67082	1.5006	1.61732	1.58193	1.41199	1.49076	1.50169
TC0100001025.mm.1	1.3534	1.36583	1.34853	1.34551	1.3773	Serpinb12	NM_001199213	serine (or cysteine) peptidase inhibitor, clade B (ovalbumin), member 12	1.4438	1.37376	1.37101	1.26179	1.31666	1.36909	1.2634	1.46107	1.36974	1.24445	1.26836	1.36179	1.51952	1.34894	1.3033	1.41707	1.3655	1.29276	1.35699	1.39501	1.37157	1.41278	1.35015
TC0100001026.mm.1	1.95921	1.89666	1.99725	1.95372	1.98095	Serpinb13	NM_172852	serine (or cysteine) peptidase inhibitor, clade B (ovalbumin), member 13	1.98292	1.86808	1.99014	1.98225	1.97265	1.97492	1.92592	1.88644	1.79937	1.83202	2.10289	1.9724	2.08167	1.99546	1.98386	1.94872	1.94886	1.8917	2.08401	1.95828	1.96253	1.94627	1.95364
TC0100001027.mm.1	1.40769	1.25809	1.40401	1.36173	1.36332	KnowTID_00000128	KnowTID_00000128	NA	1.41927	1.56215	1.2962	1.42227	1.33855	1.27805	1.25934	1.21639	1.27859	1.49032	1.22317	1.4068	1.49574	1.43045	1.46121	1.30714	1.35277	1.25709	1.40406	1.36609	1.28176	1.26892	1.49578
TC0100001028.mm.1	1.38681	1.406	1.43833	1.41624	1.41235	Serpinb11	NM_025867	serine (or cysteine) peptidase inhibitor, clade B (ovalbumin), member 11	1.33105	1.32114	1.3496	1.49402	1.43824	1.49546	1.35825	1.32708	1.44322	1.40162	1.35573	1.45675	1.53922	1.3361	1.43822	1.51545	1.42863	1.36278	1.44185	1.34089	1.49115	1.41084	1.37703
TC0100001029.mm.1	1.42456	1.49476	1.43438	1.46947	1.48841	Serpinb7	NM_027548	serine (or cysteine) peptidase inhibitor, clade B, member 7	1.46972	1.38675	1.38595	1.42063	1.45976	1.53079	1.49499	1.51131	1.44195	1.43161	1.45398	1.36184	1.49007	1.51244	1.46661	1.41329	1.46789	1.48712	1.45814	1.43975	1.51888	1.50073	1.52456
TC0100001031.mm.1	5.80768	5.80087	5.72541	5.65967	5.66095	Serpinb8	NM_001159748	serine (or cysteine) peptidase inhibitor, clade B, member 8	5.59249	5.79821	6.03207	5.79821	5.8174	5.87957	5.83839	5.67967	5.80586	5.75471	5.7072	5.74587	5.69385	5.67508	5.71728	5.11635	5.69437	6.09525	5.71492	5.54128	5.75988	5.65236	5.63632
TC0100001032.mm.1	2.36123	2.19988	2.29703	2.4088	2.32959	Gm15389	ENSMUST00000153774	predicted gene 15389	2.40137	2.381	2.10123	2.49502	2.42756	2.26788	2.38394	2.11364	2.03404	2.14942	2.39818	2.12817	2.51237	2.71821	2.32299	2.37135	2.31865	2.31279	2.36844	2.231	2.35255	2.34488	2.35111
TC0100001033.mm.1	2.46836	2.45986	2.5916	2.47561	2.60057	Gm22438	ENSMUST00000104049	predicted gene, 22438	2.40818	2.38504	2.45426	2.79429	2.30004	2.4931	2.29384	2.5136	2.53893	2.49772	2.52287	2.72834	2.61748	2.44806	2.47857	2.4697	2.52647	2.45525	2.47943	2.47916	2.75474	2.57451	2.71503
TC0100001034.mm.1	2.12385	2.08543	2.17004	2.16396	2.17617	D830032E09Rik	NR_102306	RIKEN cDNA D830032E09 gene	2.09521	2.16828	2.15187	2.14316	2.06073	2.14875	2.08831	2.02412	2.08053	2.12182	2.13799	2.16145	2.25889	2.24534	2.16895	2.18891	2.13312	2.08348	2.1076	2.27114	2.15957	2.13275	2.20977
TC0100001035.mm.1	1.29023	1.35663	1.25111	1.23655	1.15679	KnowTID_00000132	KnowTID_00000132	NA	1.38766	1.28109	1.30741	1.26224	1.21277	1.34669	1.31729	1.44221	1.32032	1.08084	1.15651	1.43552	1.33158	1.22414	1.3385	1.3183	1.04698	1.25481	1.21867	1.09546	1.19423	1.13865	1.13694
TC0100001036.mm.1	1.76874	1.68681	1.83703	1.82539	1.8844	Gm25293	ENSMUST00000122792	predicted gene, 25293	1.84929	1.70827	1.91612	1.70619	1.66385	1.79352	1.73566	1.71311	1.50497	1.6301	1.85059	1.88079	1.98664	1.88087	1.84317	1.74175	1.86199	1.79918	1.7271	2.00619	2.04529	1.95917	1.68424
TC0100001037.mm.1	1.81313	1.76954	1.8263	1.84879	1.83409	Cdh7	NM_172853	cadherin 7, type 2	1.80867	1.77962	1.82675	1.79535	1.85525	1.74127	1.79175	1.82197	1.72317	1.72701	1.85485	1.8027	1.92065	1.8366	1.89889	1.86316	1.80733	1.83795	1.8402	1.91941	1.83998	1.77756	1.79331
TC0100001038.mm.1	2.41111	2.16504	2.03604	2.16956	2.19017	KnowTID_00000133	KnowTID_00000133	NA	2.22452	2.51924	2.25795	2.56124	2.49261	2.13859	2.18944	2.09941	2.2327	2.00161	2.33664	1.97731	1.82861	2.02586	2.12495	2.22972	2.38253	2.08474	2.3253	1.89725	2.27944	2.13333	2.31554
TC0100001039.mm.1	2.93261	2.79599	2.80964	2.86382	2.90796	NONMMUT002273	NONMMUT002273	NA	2.974	2.82623	2.76551	2.76944	3.32784	2.89079	2.97016	2.5511	2.77193	2.72869	2.93718	2.54986	3.02281	2.93341	2.77077	3.05233	2.71523	2.84734	2.7598	3.07334	2.85814	2.84355	3.00498
TC0100001040.mm.1	5.1398	5.05908	5.1099	5.08653	5.17803	Gm22331	ENSMUST00000158066	predicted gene, 22331	5.23788	4.95897	5.28976	5.17335	5.03905	5.058	5.04167	5.14334	4.99329	4.93784	5.19478	5.00726	5.29971	4.99489	5.07731	5.09958	5.14476	5.11612	5.2584	5.07412	5.19363	5.17749	5.1865
TC0100001041.mm.1	6.5349	6.4664	6.46049	6.57247	6.47398	NONMMUT002282	NONMMUT002282	NA	6.49264	6.58519	6.57943	6.50208	6.51513	6.34426	6.53653	6.35782	6.62699	6.442	6.624	6.41767	6.3583	6.79981	6.52656	6.39683	6.49496	6.64419	6.49521	6.47864	6.34926	6.41603	6.63074
TC0100001042.mm.1	1.41708	1.29099	1.39576	1.35847	1.32391	NONMMUT002283	NONMMUT002283	NA	1.56212	1.43856	1.37549	1.43607	1.27314	1.24181	1.38524	1.11704	1.41988	1.36072	1.22518	1.49378	1.50335	1.40071	1.44185	1.34664	1.35437	1.24879	1.34491	1.37016	1.29792	1.38755	1.21899
TC0100001043.mm.1	1.15049	1.12853	1.14451	1.13658	1.13464	NONMMUT002285	NONMMUT002285	NA	1.08548	1.11159	1.16486	1.34496	1.04557	1.19728	1.0001	1.20721	1.10953	1.09771	1.11628	1.08231	1.28175	1.02978	1.13169	1.08844	1.26274	1.17024	1.14511	1.10695	1.30122	0.922934	1.19701
TC0100001044.mm.1	1.80247	1.74233	1.84459	1.82333	1.89646	KnowTID_00000134	KnowTID_00000134	NA	1.75736	1.78935	1.81412	1.85797	1.79356	1.82859	1.79403	1.64033	1.70639	1.92082	1.81563	1.86197	1.77993	1.8085	1.8201	1.75849	1.86035	1.86922	2.02054	1.93896	1.69796	1.69889	2.12596
TC0100001045.mm.1	7.32628	7.26101	7.21482	7.30804	7.26075	NONMMUT002288	NONMMUT002288	NA	7.18969	7.38068	7.35753	7.40963	7.29384	7.18845	7.35659	7.23541	7.26358	7.2041	7.32341	7.22116	7.11063	7.50291	7.25252	7.21848	7.27999	7.28631	7.31145	7.1969	7.22058	7.19952	7.37532
TC0100001046.mm.1	1.22943	1.24112	1.1944	1.20516	1.19708	NONMMUT002289	NONMMUT002289	NA	1.33111	1.1812	1.23901	1.17213	1.22368	1.20402	1.14684	1.3496	1.26404	1.21817	1.09225	1.22988	1.23729	1.0793	1.16672	1.369	1.20367	1.20711	1.19485	1.28844	1.15173	1.17301	1.17736
TC0100001047.mm.1	1.47809	1.41624	1.48366	1.42964	1.39571	NONMMUT002291	NONMMUT002291	NA	1.58804	1.46757	1.33639	1.50963	1.48884	1.37119	1.43823	1.42544	1.43011	1.46771	1.46428	1.4861	1.51657	1.38052	1.22593	1.4466	1.46639	1.62876	1.13158	1.62418	1.46283	1.38819	1.37179
TC0100001048.mm.1	1.88654	1.85842	1.85502	2.15449	2.03535	Cntnap5a	NM_001077425	contactin associated protein-like 5A	1.86491	1.79267	1.99516	1.81946	1.96049	1.88325	1.84667	1.8489	1.85487	1.84842	1.78132	1.82922	1.96114	1.86756	1.87117	3.33819	1.8471	1.84843	1.88091	1.90052	2.36115	2.15612	1.87805
TC0100001049.mm.1	1.23318	1.2087	1.23195	1.33115	1.28809	NONMMUT002295	NONMMUT002295	NA	1.1502	1.22741	1.25315	1.34768	1.18746	1.17499	1.18568	1.23927	1.23487	1.2344	1.21179	1.19695	1.28467	1.2175	1.41922	1.65046	1.19114	1.17742	1.2688	1.22087	1.51804	1.34212	1.09061
TC0100001050.mm.1	1.19968	1.21829	1.19581	1.26991	1.18795	NONMMUT002296	NONMMUT002296	NA	1.19965	1.14202	1.43803	1.22569	0.993016	1.4218	1.21215	1.10724	1.13195	1.25573	1.18226	1.26054	1.08471	1.21702	1.36938	1.34214	1.21826	1.20274	1.24139	1.2061	1.25645	1.08281	1.153
TC0100001051.mm.1	1.28877	1.34638	1.35129	1.33925	1.25245	NONMMUT002297	NONMMUT002297	NA	1.31673	1.21619	1.38599	1.05742	1.46751	1.29842	1.28893	1.47364	1.32455	1.32075	1.55329	1.2513	1.27981	1.21589	1.39891	1.18499	1.43021	1.46624	1.22542	1.35165	1.27854	1.16302	1.24361
TC0100001052.mm.1	1.57448	1.70247	1.58519	1.59734	1.60406	NONMMUT002299	NONMMUT002299	NA	1.45869	1.51427	1.62555	1.64029	1.63357	1.7538	1.59792	1.83302	1.62514	1.66842	1.62321	1.40702	1.64213	1.47919	1.60702	1.66442	1.62418	1.61186	1.5016	1.66273	1.56794	1.6449	1.64312
TC0100001053.mm.1	1.3846	1.36828	1.56367	1.58733	1.52513	KnowTID_00000135	KnowTID_00000135	NA	1.30569	1.44843	1.48023	1.32845	1.36022	1.561	1.25594	1.30955	1.34662	1.73453	1.46411	1.49638	1.55965	1.62123	1.43269	2.03005	1.50039	1.35229	1.36874	1.34841	1.84678	1.47866	1.58309
TC0100001054.mm.1	1.32696	1.37456	1.31989	1.35406	1.45687	Gm19965	ENSMUST00000179777	predicted gene, 19965	1.24548	1.17416	1.10845	1.53247	1.57426	1.43997	1.33263	1.33282	1.39282	1.34305	1.27267	1.19338	1.47048	1.09679	1.39171	1.34437	1.32805	1.60938	1.39549	1.62583	1.4438	1.37517	1.44404
TC0100001055.mm.1	1.40647	1.51006	1.56266	1.47059	1.39064	Gm24030	ENSMUST00000083931	predicted gene, 24030	1.39569	1.35917	1.47966	1.35947	1.43835	1.42777	1.63359	1.47467	1.50423	1.4266	1.42182	1.77257	1.62965	1.31969	1.60048	1.38061	1.61882	1.43333	1.31024	1.43447	1.49143	1.24324	1.47382
TC0100001056.mm.1	5.38792	5.03637	5.10128	5.36629	5.43951	ENSMUST00000184268	ENSMUST00000184268	ncrna:known chromosome:GRCm38:1:117561230:117561339:1 gene:ENSMUSG00000098815 gene_biotype:miRNA transcript_biotype:miRNA	5.25241	5.35369	5.61344	5.27551	5.44456	4.87755	5.4234	4.83489	5.00964	4.89442	5.34226	5.03247	5.13596	5.57472	5.33477	5.3469	5.22086	5.3542	5.24352	5.44605	5.82409	5.22171	5.46219
TC0100001057.mm.1	2.5782	2.72258	2.64478	2.6768	2.56435	NONMMUT002305	NONMMUT002305	NA	2.54787	2.4697	2.66586	2.75839	2.44915	2.63263	2.81036	2.64309	2.80425	2.67007	2.65011	2.65043	2.6085	2.74311	2.65815	2.64976	2.65411	2.67886	2.62385	2.5461	2.57981	2.55138	2.52061
TC0100001058.mm.1	6.67376	6.57731	6.43918	6.55648	6.67152	Nifk	NM_026472	nucleolar protein interacting with the FHA domain of MKI67	6.59603	6.67994	6.81758	6.47655	6.79872	6.55292	6.49147	6.62921	6.63564	6.47704	6.45574	6.46143	6.36252	6.51712	6.55025	6.49417	6.63061	6.59026	6.59643	6.60395	6.84208	6.70184	6.61331
TC0100001059.mm.1	3.14221	3.32328	3.07635	3.25481	3.29105	KnowTID_00000136	KnowTID_00000136	NA	3.33071	3.19581	3.17951	2.82864	3.17641	3.36287	3.24102	3.25647	3.43276	2.64724	3.21404	3.06742	3.37672	3.37432	3.41023	3.07822	3.19403	3.21726	3.15911	3.4945	3.30429	3.26164	3.2357
TC0100001060.mm.1	7.30707	7.49124	7.38944	7.40777	7.30243	Clasp1	NM_001081276	CLIP associating protein 1	7.40967	7.33938	6.98242	7.3781	7.42581	7.47415	7.46792	7.47521	7.54769	7.43346	7.40323	7.42308	7.29797	7.34076	7.4163	7.60752	7.31208	7.36221	7.37555	7.33041	7.10196	7.43708	7.26713
TC0100001061.mm.1	3.60391	3.60705	3.42682	3.54353	3.47732	NONMMUT002312	NONMMUT002312	NA	3.41563	3.73544	3.26971	3.82562	3.77317	3.41867	3.62279	3.74087	3.64585	3.26759	3.51591	3.57566	3.34811	3.56609	3.52619	3.61011	3.49985	3.5154	3.33831	3.49852	3.30815	3.69386	3.54774
TC0100001062.mm.1	2.24194	2.49246	2.35287	2.27202	2.26912	KnowTID_00000137	KnowTID_00000137	NA	2.29032	2.57805	2.0785	1.95185	2.31097	2.40755	2.29554	2.63429	2.63248	2.50594	2.19452	2.36214	2.34887	2.1207	2.45624	2.15876	2.23114	2.39328	2.4563	2.25726	2.21393	2.22871	2.18937
TC0100001063.mm.1	3.24941	3.35551	3.35006	3.36659	3.25133	Tfcp2l1	NM_023755	transcription factor CP2-like 1	3.32689	3.1447	3.1579	3.31062	3.30693	3.36549	3.29723	3.52544	3.23386	3.44239	3.30114	3.24853	3.40818	3.33609	3.38766	3.56891	3.30016	3.24013	3.23778	3.26927	3.17296	3.31011	3.26655
TC0100001064.mm.1	4.36746	4.42705	4.52267	4.41108	4.58068	NONMMUT002323	NONMMUT002323	NA	4.45893	4.31903	4.5172	4.26819	4.27397	4.49615	4.43331	4.65942	4.11931	4.38287	4.45413	4.53562	4.71808	4.36797	4.38166	4.39747	4.38	4.52831	4.49709	4.71359	4.67789	4.46144	4.55338
TC0100001065.mm.1	1.44981	1.58277	1.66265	1.56789	1.58124	mmu-mir-6346	ENSMUST00000183982	mmu-mir-6346	1.58702	1.45144	1.29011	1.46923	1.45127	1.4882	1.62226	1.48669	1.73395	1.55908	1.7125	1.72812	1.65089	1.71913	1.59298	1.52042	1.43077	1.57615	1.56491	1.6216	1.3394	1.70335	1.67693
TC0100001066.mm.1	2.49647	2.63862	2.58372	2.56067	2.56091	KnowTID_00000138	KnowTID_00000138	NA	2.6007	2.55471	2.53822	2.50518	2.28355	2.61889	2.65455	2.68881	2.59224	2.37396	2.58695	2.57751	2.79645	2.54635	2.51081	2.62046	2.54508	2.58063	2.50517	2.65172	2.55209	2.63204	2.46353
TC0100001067.mm.1	1.92347	1.8968	1.90274	1.8447	1.85252	Gm26831	ENSMUST00000181458	predicted gene, 26831	1.95819	1.88565	1.91629	1.9273	1.92991	2.00206	1.80922	1.91617	1.85973	2.03901	1.8013	1.79795	1.97271	1.73016	1.94894	1.80609	1.90227	1.83601	1.83154	1.80188	1.92484	1.93938	1.76497
TC0100001068.mm.1	4.31393	4.26517	4.34219	4.25297	4.22648	KnowTID_00000140	KnowTID_00000140	NA	4.48296	4.30296	4.22029	4.32253	4.24094	4.24889	4.34736	4.27539	4.18905	4.25105	4.38455	4.26917	4.46399	4.50574	4.18937	4.25371	4.0831	4.23293	4.11332	4.24121	4.16694	4.33581	4.27512
TC0100001069.mm.1	1.83203	1.75625	1.72754	1.82746	1.75253	Gm8321	ENSMUST00000181691	predicted gene 8321	1.98758	1.80875	1.85628	1.96257	1.54495	1.7969	1.67904	1.82493	1.72412	1.62312	1.76343	1.7832	1.74041	1.84691	1.84341	1.82447	1.78924	1.83328	1.79626	1.96431	1.66052	1.72278	1.6188
TC0100001070.mm.1	2.07496	2.0527	2.12065	2.05813	2.08493	KnowTID_00000142	KnowTID_00000142	NA	2.12848	1.89612	2.07956	2.14316	2.12746	2.09574	2.06259	2.08757	1.96488	2.07723	2.07592	2.08504	2.24443	2.05529	2.03398	2.08664	2.07164	2.04309	2.0148	2.18408	2.17219	2.08534	1.96826
TC0100001071.mm.1	2.08176	2.15287	2.16934	2.17067	2.16323	A330041K01	uc007ciq.1	uncharacterized LOC329239	2.17727	2.08263	2.01689	2.00644	2.12559	2.25681	2.14699	2.09846	2.10924	2.13003	2.24857	2.02682	2.27193	2.24305	2.18487	2.13021	2.00832	2.28689	1.95338	2.35103	2.13334	2.22406	2.15434
TC0100001072.mm.1	8.58443	8.52865	8.53658	8.65747	8.52242	XR_106083	XR_106083	Jackson Lab	8.50055	8.60867	8.54541	8.56424	8.70328	8.44523	8.59496	8.53431	8.54009	8.46105	8.65295	8.52597	8.50636	8.76544	8.63384	8.74072	8.57096	8.57637	8.43805	8.58537	8.54506	8.43908	8.60452
TC0100001073.mm.1	3.32873	3.31996	3.41774	3.38235	3.42229	NONMMUT002334	NONMMUT002334	NA	3.35149	3.35124	3.30152	3.23117	3.40821	3.39941	3.48956	3.14974	3.24113	3.39874	3.29538	3.36284	3.61398	3.67086	3.30171	3.28465	3.29818	3.35636	3.41091	3.3512	3.59755	3.32894	3.42286
TC0100001074.mm.1	1.94939	1.94903	2.13765	1.98909	2.048	KnowTID_00000146	KnowTID_00000146	NA	1.87606	2.23103	2.15363	1.47803	2.00818	1.90468	1.80367	2.00394	2.08383	2.21906	1.99261	2.13766	2.20126	2.07036	1.87548	2.02087	2.08366	1.89506	2.01038	2.1009	2.10395	1.94222	2.08255
TC0100001075.mm.1	2.98589	2.87378	2.97438	2.88841	2.91663	NONMMUT002340	NONMMUT002340	NA	3.07689	2.78596	2.86519	3.182	3.01942	2.8096	2.96064	2.88594	2.83895	2.84166	3.00998	3.01512	3.03076	2.89921	2.82202	2.78912	3.06484	2.86687	2.72724	3.00341	2.92875	2.91708	3.00667
TC0100001076.mm.1	5.95642	6.06947	6.06298	5.8442	6.03619	Tmem185b	NM_146103	transmembrane protein 185B	5.82783	6.04844	5.93009	5.96768	6.00805	5.90275	6.07436	6.03559	6.26516	6.12979	5.92912	6.01795	6.17507	5.74371	5.87672	5.78182	5.78484	6.0339	6.06919	5.98725	5.98682	6.07136	6.06635
TC0100001077.mm.1	1.53736	1.43189	1.57784	1.43547	1.39487	Gm25322	ENSMUST00000122556	predicted gene, 25322	1.61829	1.51025	1.4762	1.66634	1.41572	1.4336	1.3987	1.43165	1.4636	1.49905	1.57435	1.58525	1.65273	1.35665	1.36461	1.55412	1.47141	1.43054	1.19999	1.46598	1.47225	1.38495	1.45119
TC0100001078.mm.1	9.6027	9.53609	9.60081	9.43839	9.55588	Gm3851	ENSMUST00000168653	predicted gene 3851	9.48491	9.48877	9.76806	9.66919	9.60257	9.5285	9.50035	9.419	9.69651	9.59377	9.58217	9.54508	9.68222	9.55645	9.35828	9.40776	9.43445	9.43499	9.52614	9.31097	9.83835	9.55313	9.55079
TC0100001079.mm.1	2.83655	2.64399	2.68712	2.68169	2.74437	Gm8338	ENSMUST00000163928	predicted gene 8338	2.9977	2.85412	3.04684	2.60119	2.6829	2.66161	2.62217	2.72376	2.56842	2.59211	2.67359	2.53774	2.94506	2.71327	2.64572	2.74866	2.66864	2.63214	2.63859	2.82267	2.73035	2.85226	2.67798
TC0100001080.mm.1	2.58165	2.63537	2.60896	2.5388	2.58916	KnowTID_00000148	KnowTID_00000148	NA	2.55626	2.58552	2.55311	2.61724	2.5961	2.63726	2.36796	2.97705	2.5592	2.60966	2.60966	2.50253	2.71398	2.59142	2.5398	2.29182	2.67397	2.59701	2.54251	2.68563	2.49573	2.55708	2.66486
TC0100001081.mm.1	1.52728	1.39256	1.42498	1.53046	1.50649	NONMMUT002369	NONMMUT002369	NA	1.59474	1.4561	1.59585	1.54085	1.44887	1.41509	1.44438	1.26125	1.44953	1.38284	1.34548	1.46356	1.50803	1.48295	1.35869	1.75723	1.64655	1.40687	1.59405	1.5044	1.49703	1.49928	1.43771
TC0100001082.mm.1	2.06828	2.23027	2.23766	2.069	2.10996	Gm17973	ENSMUST00000174509	predicted gene, 17973	2.12475	2.20733	2.10722	1.94416	1.95791	2.2452	2.11829	2.18718	2.37042	1.96593	2.24181	2.23561	2.50727	2.12824	1.93352	1.98349	2.00139	2.29835	1.81784	2.38846	2.13177	2.05874	2.15299
TC0100001083.mm.1	4.13517	4.21635	4.28313	4.40152	4.35535	Sctr	NM_001012322	secretin receptor	4.12105	4.00026	4.09174	4.21097	4.25184	4.31244	4.35628	4.21071	3.98595	4.22945	4.27373	4.21091	4.41845	4.39615	4.05025	5.23565	4.14039	4.18516	4.07292	4.30009	4.52257	4.35196	4.52924
TC0100001084.mm.1	3.19927	3.35983	3.19378	3.22044	3.3492	NONMMUT002372	NONMMUT002372	NA	3.1544	3.07129	3.38578	3.09223	3.29265	3.32155	3.24389	3.43779	3.43609	3.22785	3.23362	3.14109	3.17257	3.37694	3.2067	3.23272	3.27814	3.00769	3.0922	3.7574	3.38519	3.25858	3.25263
TC0100001085.mm.1	3.1065	3.17825	3.12239	3.15425	3.14441	3110009E18Rik	NM_001172074	RIKEN cDNA 3110009E18 gene	3.23918	3.09682	2.96405	3.03894	3.19349	3.13895	3.14833	3.15564	3.27009	3.14496	3.10864	3.17266	3.06331	3.17901	3.21929	3.14378	3.1148	3.11434	3.10833	3.18922	3.15476	3.14029	3.12946
TC0100001086.mm.1	3.2006	3.16541	3.26127	3.28128	3.16883	C1ql2	NM_207233	complement component 1, q subcomponent-like 2	3.23402	3.21365	3.1352	3.10301	3.31712	3.08316	3.22708	3.32702	3.0244	3.11003	3.31253	3.21562	3.40688	3.33592	3.20948	3.22356	3.32068	3.31676	3.13758	3.26373	3.04461	3.19219	3.20606
TC0100001087.mm.1	2.20605	2.31763	2.35182	2.25358	2.15748	KnowTID_00000149	KnowTID_00000149	NA	2.21964	2.268	2.2011	2.3247	2.01681	2.31322	2.32809	2.28277	2.34643	2.18247	2.5276	2.19762	2.49959	2.14613	2.43246	2.20953	2.10178	2.37798	1.97916	2.3662	2.14991	2.09618	2.19594
TC0100001088.mm.1	3.64146	3.62459	3.72443	3.69619	3.73811	En1	NM_010133	engrailed 1	3.79402	3.51976	3.62687	3.55198	3.71468	3.59817	3.61784	3.81706	3.46528	3.74406	3.65556	3.6866	3.81149	3.70939	3.58421	3.67662	3.75346	3.75727	3.60797	3.92325	3.71698	3.77637	3.66599
TC0100001089.mm.1	2.53592	2.58042	2.52826	2.58958	2.60965	KnowTID_00000150	KnowTID_00000150	NA	2.61781	2.42626	2.49575	2.55427	2.58552	2.60083	2.5077	2.71151	2.50164	2.4121	2.57207	2.47524	2.65363	2.69212	2.60266	2.44834	2.58491	2.61986	2.53046	2.71895	2.69194	2.56323	2.54366
TC0100001090.mm.1	3.30254	3.33757	3.33646	3.36646	3.23476	NONMMUT002377	NONMMUT002377	NA	3.25744	3.3239	3.35923	3.17696	3.39517	3.36185	3.39809	3.34006	3.25028	3.22296	3.31135	3.45335	3.35817	3.38567	3.17696	3.45776	3.41673	3.39518	3.1162	3.29322	3.13503	3.26576	3.36357
TC0100001091.mm.1	1.49969	1.49981	1.6138	1.39381	1.49656	KnowTID_00000151	KnowTID_00000151	NA	1.54077	1.42744	1.54443	1.49027	1.49554	1.55893	1.55685	1.38609	1.49739	1.50156	1.63594	1.66695	1.65073	1.37065	1.26719	1.40473	1.50217	1.42432	1.41926	1.62407	1.51672	1.3994	1.52336
TC0100001092.mm.1	1.70411	1.74634	1.73621	1.75344	1.77073	Celrr	NR_038008	cerebellum expressed regulatory RNA	1.78081	1.69684	1.6926	1.68158	1.66875	1.75917	1.72509	1.83231	1.66878	1.66789	1.71124	1.71383	1.85186	1.72432	1.74788	1.76049	1.78138	1.75316	1.70598	1.86869	1.7917	1.74581	1.74147
TC0100001093.mm.1	1.24407	1.21637	1.22501	1.17159	1.21105	KnowTID_00000163	KnowTID_00000163	NA	1.20461	1.34799	1.3232	0.977034	1.36753	1.09966	1.09617	1.41538	1.25429	1.30106	1.07312	1.32475	1.2011	1.23062	1.10073	1.12572	1.21414	1.18673	1.14866	1.16955	1.30316	1.22697	1.2069
TC0100001094.mm.1	2.87619	2.89099	2.85037	3.05444	2.87142	NONMMUT002397	NONMMUT002397	NA	2.98643	2.63873	2.74164	2.87526	3.1389	3.0226	2.90684	3.08986	2.54467	2.77984	2.85543	2.80544	2.96077	3.32103	3.10622	2.69107	3.09792	3.05598	2.89675	3.03296	2.93637	2.58031	2.91069
TC0100001095.mm.1	2.00754	1.97009	1.91924	2.01401	1.8845	KnowTID_00000164	KnowTID_00000164	NA	2.10358	1.86583	1.69796	2.03087	2.33947	2.0513	1.93439	1.99944	1.89523	2.11152	1.79669	1.77743	1.99132	2.09935	2.15111	1.71694	2.3147	1.78793	2.28093	1.91677	1.6567	1.71087	1.85725
TC0100001096.mm.1	6.02988	6.04875	5.93551	5.92789	5.96527	Ccdc93	NM_001025156	coiled-coil domain containing 93	6.02702	6.05789	5.93527	6.02116	6.10806	6.0057	6.01327	5.98794	6.18812	5.96185	5.95059	5.95259	5.87701	5.88592	5.91822	5.7909	5.91611	6.12833	6.03865	5.9104	5.9548	5.99004	5.93246
TC0100001097.mm.1	5.02718	4.9496	4.97933	5.01747	5.10308	Gm8217	ENSMUST00000119136	predicted gene 8217	5.00246	4.94277	5.37521	4.8425	4.97294	5.00553	4.84269	5.0521	4.89808	4.89858	5.1147	4.96139	4.94263	5.09869	4.94454	4.89278	5.12217	5.02919	5.11061	5.1443	5.13743	5.00681	5.11623
TC0100001098.mm.1	3.17923	3.19846	3.2873	3.21075	3.22307	XR_106086	XR_106086	Jackson Lab	3.11442	3.23497	3.12807	3.23219	3.1865	3.26035	3.23984	3.22891	3.06475	3.41144	3.1818	3.37383	3.18214	3.46072	3.14109	3.12812	3.13639	3.18744	3.22108	3.21399	3.3878	3.1881	3.10439
TC0100001099.mm.1	1.90177	1.84974	1.9491	1.77985	1.8782	KnowTID_00000165	KnowTID_00000165	NA	1.96191	1.90318	1.92139	1.839	1.88337	1.80888	2.03437	1.85831	1.69742	2.03128	1.78555	2.06087	1.91871	1.80669	1.59886	1.83401	1.82173	1.83797	1.8335	1.98606	2.02369	1.73562	1.81214
TC0100001100.mm.1	2.36495	2.46728	2.41154	2.43593	2.39994	KnowTID_00000166	KnowTID_00000166	NA	2.28272	2.25542	2.40113	2.38375	2.50171	2.3746	2.36645	2.67917	2.4489	2.44526	2.42673	2.3031	2.47106	2.46094	2.31773	2.33443	2.63698	2.42959	2.38995	2.42348	2.43339	2.35035	2.40253
TC0100001101.mm.1	1.75695	1.84462	1.8208	1.7016	1.84067	Gm24547	ENSMUST00000158649	predicted gene, 24547	1.74037	1.72553	1.89092	1.61891	1.80905	2.04535	1.66279	2.03397	1.63639	1.76285	1.9327	1.9174	1.67026	1.63246	1.77449	1.73415	1.76356	1.60336	1.88329	1.69647	1.92428	1.76648	1.93285
TC0100001102.mm.1	1.63304	1.63531	1.58478	1.51091	1.53639	KnowTID_00000167	KnowTID_00000167	NA	1.4935	1.56709	1.70417	1.83535	1.5651	1.71156	1.53682	1.58913	1.70375	1.52991	1.66099	1.68529	1.46292	1.46102	1.54335	1.60868	1.42677	1.51471	1.3315	1.61425	1.72126	1.50579	1.50914
TC0100001103.mm.1	2.57956	2.40421	2.44829	2.57402	2.55915	Gm25771	ENSMUST00000158565	predicted gene, 25771	2.59943	2.50717	2.71721	2.63149	2.4425	2.4542	2.50258	2.42257	2.23748	2.30565	2.57402	2.38292	2.53058	2.69859	2.51375	2.54712	2.6005	2.51016	2.49131	2.60076	2.70302	2.52074	2.47993
TC0100001104.mm.1	1.45179	1.46646	1.50482	1.55794	1.49711	KnowTID_00000168	KnowTID_00000168	NA	1.47477	1.42832	1.48071	1.46877	1.4064	1.41447	1.41842	1.70014	1.33279	1.84349	1.38998	1.36591	1.41992	1.32368	1.95109	1.3705	1.53653	1.6079	1.66773	1.63424	1.40361	1.36785	1.41214
TC0100001105.mm.1	10.3788	10.3443	10.3596	10.4286	10.2976	Gm22610	ENSMUST00000158287	predicted gene, 22610	10.288	10.4076	10.3436	10.3646	10.4901	10.2052	10.436	10.3182	10.4178	10.2944	10.3703	10.2902	10.4835	10.5117	10.4173	10.5486	10.3521	10.3135	10.1842	10.4324	10.3124	10.2137	10.3451
TC0100001106.mm.1	4.24994	4.30768	4.35098	4.36726	4.2471	Gm10543	ENSMUST00000097605	predicted gene 10543	4.32711	4.28079	4.17018	4.35948	4.11214	4.31953	4.46854	4.41026	4.03237	4.21207	4.19911	4.40564	4.5871	4.36567	4.31918	4.44036	4.3798	4.33127	4.208	4.278	4.33974	4.13655	4.27321
TC0100001107.mm.1	3.05636	3.04022	3.06125	3.01851	3.15645	Gm25578	ENSMUST00000083406	predicted gene, 25578	3.03247	3.06881	3.30165	3.08388	2.79498	3.15035	2.93543	3.08809	2.98702	2.98095	3.09084	3.07259	3.10064	2.92562	2.87963	3.00385	3.11944	3.16398	3.06668	2.93138	3.56371	3.13008	3.09041
TC0100001108.mm.1	6.85481	6.63842	6.59939	6.75244	6.76907	Xdh	BC020078	xanthine dehydrogenase	6.45419	6.99512	6.89978	6.87797	7.04701	6.43061	6.92842	6.58816	6.60648	6.4674	6.81357	6.6002	6.51637	6.97782	6.72733	6.67519	6.67019	6.71165	6.65131	6.73373	6.845	6.67952	6.93579
TC0100001109.mm.1	7.3247	7.32464	7.09911	7.28674	7.20248	KnowTID_00000169	KnowTID_00000169	NA	7.07451	7.29067	7.59704	7.30123	7.36005	7.14415	7.58714	7.26738	7.29989	7.11117	7.37058	7.04533	6.86938	7.44836	7.28784	7.44822	7.05953	7.18973	7.13636	7.10395	7.25329	7.16875	7.35002
TC0100001110.mm.1	1.64795	1.66214	1.71574	1.74352	1.67064	NONMMUT002433	NONMMUT002433	NA	1.49052	1.61777	1.66434	1.77314	1.69397	1.63747	1.67936	1.70656	1.62517	1.62674	1.57438	1.752	1.90986	1.76414	1.76774	1.76166	1.63092	1.79313	1.76226	1.76774	1.58212	1.60547	1.6356
TC0100001111.mm.1	7.15426	7.10247	7.08565	7.00625	7.1772	Slc35f5	NM_028787	solute carrier family 35, member F5	6.99118	7.18168	7.17677	7.23022	7.19145	6.98864	7.12384	6.94848	7.34892	7.13885	6.99263	7.02179	7.18932	6.95821	7.04628	6.85768	7.05759	7.1115	7.19627	7.06515	7.22355	7.19896	7.20206
TC0100001112.mm.1	4.55944	4.58889	4.54732	4.42036	4.63518	Gpr39	NM_027677	G protein-coupled receptor 39	4.60429	4.61719	4.63688	4.54945	4.38938	4.55585	4.51746	4.5384	4.74387	4.57033	4.45945	4.4135	4.74599	4.2679	4.45298	4.30163	4.57403	4.50528	4.66453	4.64862	4.89614	4.32905	4.63754
TC0100001113.mm.1	1.82473	1.69871	1.71095	1.85484	1.76814	NONMMUT002451	NONMMUT002451	NA	1.70641	1.71985	1.91263	1.896	1.88878	1.75919	1.76113	1.73389	1.54064	1.74965	1.66171	1.84191	1.59054	1.73981	1.90324	2.07453	1.77511	1.78152	1.65043	1.98317	1.55825	1.85022	1.79862
TC0100001114.mm.1	6.78129	6.82883	6.79061	6.55314	6.61602	Mgat5	NM_145128	mannoside acetylglucosaminyltransferase 5	6.73997	7.23452	6.80526	6.49505	6.63166	6.90119	6.7824	6.84341	6.78829	6.79483	6.76241	6.77593	6.82926	6.2488	6.55971	6.58207	6.69441	6.68075	6.67383	6.77601	6.24025	6.81422	6.57576
TC0100001115.mm.1	2.19808	2.09929	2.19722	2.05363	2.03121	NONMMUT002453	NONMMUT002453	NA	2.08438	2.23993	2.55891	2.10822	1.99894	2.01731	1.99606	2.12799	2.25579	2.2906	2.11086	2.20121	2.18622	1.91895	2.05922	2.10243	2.14879	2.03876	2.03311	2.05629	1.84305	2.08098	2.14264
TC0100001116.mm.1	2.76548	2.70413	2.66986	2.4918	2.51665	NONMMUT002454	NONMMUT002454	NA	2.51625	3.05788	2.81088	2.69237	2.75002	2.68796	2.77334	2.83684	2.51837	2.87406	2.5118	2.57054	2.72303	2.70932	2.51185	2.2481	2.55005	2.43968	2.40048	2.81429	2.14117	2.53871	2.68861
TC0100001117.mm.1	4.91879	4.69048	4.66485	4.7064	4.91982	Gm23370	ENSMUST00000175405	predicted gene, 23370	4.82428	4.8341	5.44591	4.72837	4.76129	4.82493	4.56432	4.7023	4.67037	4.5652	4.61358	4.84336	4.63726	4.60714	4.61765	4.57914	4.86009	4.868	4.81767	4.62255	5.35073	4.76206	5.04609
TC0100001118.mm.1	2.69476	2.63157	2.67451	2.5903	2.59014	NONMMUT002456	NONMMUT002456	NA	2.60038	2.96297	2.67747	2.53777	2.69522	2.64714	2.77042	2.60571	2.50302	2.77641	2.37886	2.82094	2.72184	2.71854	2.44232	2.58338	2.47444	2.73279	2.38615	2.71166	2.63747	2.54865	2.66679
TC0100001119.mm.1	6.57149	6.517	6.2774	6.3716	6.35137	Gm23734	ENSMUST00000083753	predicted gene, 23734	6.42408	6.66725	7.03215	6.33597	6.398	6.62477	6.35397	6.68226	6.407	6.43227	6.3584	6.20839	6.11052	5.96329	6.22736	6.39514	6.71809	6.55412	6.27726	6.26852	6.56274	6.35932	6.28899
TC0100001120.mm.1	2.75537	2.6719	2.729	2.71717	2.80714	NONMMUT002458	NONMMUT002458	NA	2.48476	2.99694	2.95186	2.70823	2.63508	2.75767	2.57711	2.63507	2.71776	2.50671	2.81655	2.92996	2.66279	2.75085	2.84096	2.68895	2.75127	2.5538	2.65422	2.93314	2.62492	2.85558	2.96784
TC0100001121.mm.1	6.86437	6.9298	7.05	6.59157	6.7083	Mgat5	uc007ckt.3	mannoside acetylglucosaminyltransferase 5	6.79598	7.21162	6.92024	6.64163	6.75235	6.9465	6.90798	6.90298	6.96171	7.05394	7.03429	6.98645	7.12532	6.37807	6.59113	6.63575	6.74963	6.60326	6.81489	6.89514	6.1289	6.93335	6.76922
TC0100001122.mm.1	6.05738	5.92699	5.81815	5.84233	5.8569	AB349653	uc029qtc.1	NA	5.45227	6.24569	6.15692	6.06666	6.36538	5.69206	6.35479	5.50983	6.15127	5.72445	5.93532	5.95121	5.66164	6.04755	5.92274	5.84979	5.84501	5.54656	5.82295	5.84522	6.01174	5.70929	5.89533
TC0100001123.mm.1	1.83626	1.82788	1.84306	1.87388	1.88839	Acmsd	NM_001033041	amino carboxymuconate semialdehyde decarboxylase	1.89052	1.84644	1.87472	1.81478	1.75482	1.88189	1.84236	1.82515	1.76213	1.72537	1.79362	1.86164	1.99161	1.95652	1.83942	1.91592	1.81369	1.84385	1.80354	1.90973	1.9474	1.85819	1.92309
TC0100001124.mm.1	6.15407	6.18754	6.15779	6.10012	6.00921	Ccnt2	NM_028399	cyclin T2	6.15756	6.12958	6.1047	6.24878	6.12973	6.15359	6.17717	6.16397	6.25544	6.24304	6.1884	6.18222	6.01752	6.14553	6.1794	6.00568	6.08589	6.08412	6.16155	5.95182	5.84532	5.97674	6.11064
TC0100001125.mm.1	6.30589	6.19049	6.29833	6.24981	6.18708	Rab3gap1	NM_178690	RAB3 GTPase activating protein subunit 1	6.20439	6.20555	6.26974	6.45962	6.39013	6.11002	6.13883	6.22203	6.2911	6.37124	6.25892	6.34306	6.22012	6.28745	6.2457	6.27394	6.26301	6.17893	6.26863	6.007	6.2191	6.19757	6.24311
TC0100001126.mm.1	1.94224	1.89031	1.81335	1.747	1.7703	NONMMUT002473	NONMMUT002473	NA	1.79221	1.76367	1.79645	2.13789	2.221	1.48211	1.99151	1.89774	2.18988	1.75818	1.83646	1.97267	1.68608	1.72273	1.87765	1.88529	1.71897	1.53036	1.79161	1.90216	1.71839	1.7138	1.72554
TC0100001127.mm.1	2.52771	2.44322	2.54394	2.53581	2.52262	NONMMUT002478	NONMMUT002478	NA	2.43337	2.80802	2.48704	2.33469	2.57544	2.55445	2.26408	2.54608	2.40826	2.43453	2.52838	2.52802	2.68482	2.54731	2.59463	2.46213	2.6391	2.43591	2.37748	2.56731	2.59845	2.50505	2.56482
TC0100001128.mm.1	10.2542	10.1844	10.1561	10.2161	10.2272	Rpl28-ps1	ENSMUST00000121497	ribosomal protein L28, pseudogene 1	10.1273	10.1572	10.4497	10.214	10.3229	10.215	10.1629	10.1563	10.2033	10.1206	10.151	10.198	10.1547	10.2464	10.2666	10.1316	10.2606	10.1751	10.2373	10.2617	10.4293	10.1383	10.0695
TC0100001129.mm.1	7.12342	7.21434	7.14755	7.10745	7.09229	R3hdm1	NM_181750	R3H domain containing 1	7.03644	7.15034	7.05255	7.18395	7.19382	7.24583	7.19349	7.16656	7.25147	7.19092	7.16183	7.19215	7.04532	7.12684	7.14492	7.13806	7.08234	7.04511	7.09578	7.10203	7.09547	7.08296	7.08519
TC0100001130.mm.1	3.89256	3.91197	3.78759	3.80765	3.75324	NONMMUT002489	NONMMUT002489	NA	3.84248	3.93921	3.89966	4.12084	3.66063	3.76209	4.07663	3.94194	3.86721	3.79506	3.71649	3.75183	3.88698	3.77391	3.91332	3.77434	3.8402	3.73646	3.84727	3.60948	3.74987	3.59666	3.96294
TC0100001131.mm.1	3.11477	3.14827	3.03805	2.85265	2.91753	NONMMUT002491	NONMMUT002491	NA	2.75802	3.43862	3.10156	3.23393	3.04172	2.63736	3.24625	3.24824	3.46123	2.80729	3.03403	3.00036	3.31051	2.86656	2.77444	2.6862	2.85629	3.07977	3.14724	3.05093	2.68458	2.69894	3.00594
TC0100001132.mm.1	2.809	2.78137	2.70988	2.7091	2.58589	NONMMUT002492	NONMMUT002492	NA	2.57607	3.0165	2.85562	2.98804	2.60875	2.67444	2.90206	2.66158	2.88742	2.7251	2.73475	2.6999	2.67979	2.5496	3.0005	2.68075	2.6852	2.62943	2.74284	2.36142	2.35432	2.58359	2.8873
TC0100001133.mm.1	4.01905	4.09734	3.93208	3.91582	4.03784	NONMMUT002493	NONMMUT002493	NA	3.59091	4.12632	4.03425	4.29149	4.05228	3.94154	4.1904	4.03062	4.2268	3.8872	4.08732	3.81365	3.94015	3.82988	3.93548	4.00089	3.83762	3.97522	3.99958	3.64047	4.04587	4.02032	4.48299
TC0100001134.mm.1	2.58352	2.53428	2.59183	2.52478	2.49245	NONMMUT002497	NONMMUT002497	NA	2.33607	2.50258	2.70623	2.53562	2.83711	2.58374	2.49869	2.50911	2.54558	2.54093	2.79243	2.47808	2.55589	2.50076	2.51949	2.37893	2.6842	2.54053	2.59781	2.47424	2.44784	2.46818	2.47421
TC0100001135.mm.1	4.04288	4.3404	4.14596	4.08911	3.98896	NONMMUT002498	NONMMUT002498	NA	3.64935	4.20093	3.81111	4.18927	4.36373	4.15805	4.25074	4.33432	4.61848	4.24222	4.25196	3.97062	4.11905	4.10851	4.04112	4.05745	4.35546	3.88301	3.66734	4.10648	3.86518	4.0339	4.2719
TC0100001136.mm.1	5.01383	5.21888	5.04172	5.01303	4.98311	NONMMUT002499	NONMMUT002499	NA	4.72338	5.12522	5.01732	5.16773	5.03548	5.04974	5.41212	5.13131	5.28233	4.85857	5.42836	5.12324	4.7567	5.0414	4.86143	5.2909	4.88068	4.99074	4.9054	4.92766	4.77522	5.0224	5.28487
TC0100001137.mm.1	3.56831	3.59235	3.57351	3.55689	3.5441	Mir128-1	NR_029543	microRNA 128-1	3.20045	3.67161	3.42613	3.5203	4.02304	3.40716	3.67058	3.53836	3.75331	3.63968	3.47197	3.4831	3.69927	3.66254	3.4403	3.6369	3.55394	3.49078	3.61784	3.71755	3.24099	3.531	3.61312
TC0100001138.mm.1	8.47038	8.52696	8.48753	8.44036	8.45597	Ubxn4	NM_026390	UBX domain protein 4	8.45297	8.40501	8.47588	8.55012	8.46791	8.52939	8.5093	8.46097	8.60817	8.54852	8.42431	8.44591	8.53137	8.40001	8.45007	8.3963	8.44848	8.50696	8.49625	8.36071	8.53064	8.42018	8.47207
TC0100001139.mm.1	4.70458	4.87512	4.6267	4.73608	4.71823	NONMMUT002502	NONMMUT002502	NA	4.30695	4.94165	4.66698	4.96104	4.64627	4.42834	5.05977	4.93632	5.07605	4.61111	4.62934	4.63529	4.63104	4.84492	4.66639	4.72884	4.63721	4.80303	4.54478	4.87528	4.61641	4.61228	4.94237
TC0100001140.mm.1	1.02224	1.08101	1.00678	1.15162	1.04243	NONMMUT002504	NONMMUT002504	NA	1.06947	0.994016	1.00154	0.951606	1.09458	1.07425	1.02039	1.27412	0.955257	0.946063	1.03591	0.989096	1.05604	1.04977	1.2846	1.23985	0.956978	1.2269	1.07761	1.0759	0.958626	1.03409	1.06593
TC0100001141.mm.1	2.16603	2.13347	2.15986	2.10259	2.04117	Gm23902	ENSMUST00000157571	predicted gene, 23902	2.19256	2.07311	2.03576	2.21159	2.31714	2.22054	2.14719	2.233	1.93314	2.09365	2.29581	2.11525	2.13472	2.14341	2.13403	2.05446	2.11996	2.06109	2.21014	2.02687	1.94706	2.07413	1.94766
TC0100001142.mm.1	1.57353	1.42578	1.35763	1.48809	1.39563	NONMMUT002507	NONMMUT002507	NA	1.39827	1.52814	1.68477	1.28737	1.9691	1.45053	1.38455	1.47353	1.39453	1.40299	1.21542	1.4819	1.3302	1.39408	1.4878	1.45066	1.27874	1.82916	1.47635	1.39062	1.29663	1.57243	1.24214
TC0100001143.mm.1	2.24826	2.23756	2.38713	2.25649	2.22412	NONMMUT002508	NONMMUT002508	NA	2.41696	2.24602	2.14802	2.15615	2.27414	2.28518	2.1804	2.37301	2.11165	2.317	2.40539	2.23997	2.58618	2.49096	2.20211	2.17461	2.28942	2.12537	2.21929	2.23553	2.20987	2.29911	2.1568
TC0100001144.mm.1	1.92474	1.93097	2.04483	2.03059	1.9709	NONMMUT002510	NONMMUT002510	NA	1.96031	1.95682	1.9273	1.77993	1.99936	1.8224	2.02039	1.78399	2.09711	2.06299	2.09974	1.92911	2.08748	2.16737	1.98661	2.00786	1.95676	2.03434	2.03198	1.91698	1.97175	1.97112	1.96266
TC0100001145.mm.1	2.53812	2.54112	2.53809	2.57788	2.58164	Thsd7b	NM_172485	thrombospondin, type I, domain containing 7B	2.65959	2.47341	2.55093	2.50772	2.49894	2.52583	2.54006	2.57376	2.52483	2.4099	2.54649	2.52672	2.66924	2.63184	2.56573	2.577	2.54196	2.57285	2.50842	2.71938	2.56556	2.56437	2.55049
TC0100001146.mm.1	1.22372	1.24888	1.27236	1.25074	1.23435	NONMMUT002514	NONMMUT002514	NA	1.18421	1.23998	1.25135	1.09381	1.34926	0.980981	1.25886	1.22575	1.52994	1.34556	1.22676	1.24089	1.27623	1.28138	1.11276	1.21737	1.33679	1.3054	1.2827	1.17833	1.28896	1.20228	1.21946
TC0100001147.mm.1	1.46496	1.46452	1.58908	1.48763	1.60394	NONMMUT002515	NONMMUT002515	NA	1.49508	1.42302	1.45391	1.52188	1.4309	1.42758	1.60158	1.45035	1.37858	1.63116	1.51164	1.61093	1.60258	1.46464	1.52779	1.30086	1.44288	1.70199	1.62241	1.73368	1.68362	1.46855	1.51145
TC0100001148.mm.1	1.33894	1.36952	1.38268	1.42054	1.37755	NONMMUT002516	NONMMUT002516	NA	1.34725	1.20692	1.48826	1.41882	1.23345	1.33449	1.33121	1.43521	1.37716	1.33728	1.24624	1.51748	1.42972	1.51045	1.44589	1.43619	1.23676	1.47341	1.37914	1.5402	1.23459	1.31382	1.42001
TC0100001149.mm.1	1.9381	1.99088	1.98777	2.06261	1.99655	NONMMUT002518	NONMMUT002518	NA	1.95305	1.9053	2.04051	1.96825	1.82338	1.80316	2.18578	2.04644	1.92814	2.2157	1.76196	1.99113	1.98228	2.17184	2.09713	2.14031	2.00654	1.89722	2.13008	1.89992	1.83948	2.0963	2.017
TC0100001150.mm.1	1.879	1.5962	1.85088	1.676	1.71691	NONMMUT002519	NONMMUT002519	NA	1.97567	1.61432	1.90414	2.07717	1.82368	1.6992	1.71629	1.61512	1.35422	2.13959	1.70304	1.7411	1.8198	1.78153	1.70959	1.60974	1.54128	1.73784	1.8777	1.75524	1.68043	1.67635	1.59482
TC0100001151.mm.1	1.48051	1.5012	1.53153	1.40381	1.53158	NONMMUT002520	NONMMUT002520	NA	1.33172	1.41255	1.51539	1.49433	1.64856	1.51071	1.46682	1.41509	1.61219	1.50981	1.47487	1.52806	1.6134	1.36276	1.48969	1.31343	1.39565	1.45752	1.37712	1.60681	1.40402	1.50904	1.76091
TC0100001152.mm.1	1.3858	1.28694	1.30032	1.34989	1.37178	NONMMUT002521	NONMMUT002521	NA	1.53102	1.23537	1.40277	1.40612	1.35373	1.28067	1.28691	1.40007	1.18011	1.26971	1.2895	1.4748	1.16728	1.16917	1.47903	1.20548	1.41788	1.47787	1.37311	1.52442	1.37814	1.34173	1.2415
TC0100001153.mm.1	1.34603	1.37332	1.36671	1.41004	1.40324	NONMMUT002522	NONMMUT002522	NA	1.28331	1.49689	1.44563	1.31158	1.19276	1.36328	1.42493	1.41231	1.29277	1.51897	1.49315	1.23714	1.21758	1.4648	1.41951	1.32789	1.32314	1.51487	1.4578	1.36024	1.40011	1.35274	1.44532
TC0100001154.mm.1	2.33972	2.3861	2.56173	2.37012	2.42447	Gm15674	ENSMUST00000143266	predicted gene 15674	2.35269	2.3404	2.48702	2.07813	2.44038	2.44913	2.34833	2.36738	2.37956	2.36391	2.55784	2.49022	2.83496	2.51476	2.4247	2.34631	2.25876	2.30606	2.31203	2.65313	2.3884	2.52016	2.24861
TC0100001155.mm.1	1.76531	1.76207	1.70896	1.75531	1.73638	Gm16083	ENSMUST00000125681	predicted gene 16083	1.82206	1.67897	1.86046	1.61429	1.85079	1.73821	1.73534	1.73868	1.83607	1.70295	1.76035	1.57844	1.79412	1.72708	1.75023	1.9726	1.70165	1.625	1.59551	1.87153	1.71801	1.77261	1.72423
TC0100001156.mm.1	1.45553	1.38528	1.50537	1.37133	1.31366	KnowTID_00000170	KnowTID_00000170	NA	1.45923	1.37869	1.48902	1.42145	1.52926	1.3107	1.42108	1.43038	1.37897	1.3067	1.40817	1.71231	1.59432	1.4458	1.27793	1.41545	1.37457	1.34288	1.44148	1.24052	1.31135	1.32656	1.24839
TC0100001157.mm.1	2.20293	2.34368	2.22414	2.3275	2.20539	KnowTID_00000171	KnowTID_00000171	NA	2.25205	2.18646	2.41098	2.10208	2.06312	2.47088	2.26722	2.35892	2.27769	2.12028	2.24751	2.24752	2.28125	2.27446	2.21942	2.36685	2.34718	2.42959	2.33556	2.21292	2.12123	2.10227	2.25498
TC0100001158.mm.1	5.2585	5.26378	5.27198	5.23613	5.25958	Yod1	NM_178691	YOD1 OTU deubiquitinating enzyme 1 homologue (S. cerevisiae)	5.19863	5.2758	5.32346	5.20721	5.28737	4.95652	5.26158	5.41946	5.41756	5.22278	5.38918	5.14614	5.32984	5.24339	5.29478	5.19887	5.22088	5.22276	5.2985	5.10098	5.45033	5.18728	5.26081
TC0100001159.mm.1	5.33176	5.41634	5.31403	5.20985	5.19272	NONMMUT002538	NONMMUT002538	NA	5.28407	5.19296	5.48742	5.51807	5.17629	5.06578	5.65921	5.41963	5.52076	5.39713	5.29198	5.29995	5.26706	5.48114	5.17489	5.18758	4.9632	5.24245	5.26015	4.96769	5.45419	5.04027	5.2413
TC0100001160.mm.1	3.71566	3.73025	3.7204	3.82712	3.75011	NONMMUT002541	NONMMUT002541	NA	3.8396	3.60606	3.57199	3.75076	3.80991	3.83422	3.65968	3.36386	4.06326	3.56087	3.66827	3.87037	3.78209	3.89206	3.9254	3.67483	3.93254	3.71077	3.75214	3.67652	3.47395	4.12924	3.71871
TC0100001161.mm.1	4.37449	4.25939	4.31615	4.39455	4.29457	AA986860	NM_177604	expressed sequence AA986860	4.31974	4.39015	4.30623	4.3416	4.51474	4.35879	4.28889	4.25241	4.13747	4.25868	4.2444	4.38117	4.38032	4.57508	4.34821	4.35928	4.42695	4.26321	4.2223	4.41567	4.23198	4.24651	4.35636
TC0100001162.mm.1	2.51439	2.4341	2.50755	2.58787	2.54601	KnowTID_00000172	KnowTID_00000172	NA	2.37541	2.58935	2.56854	2.53891	2.49974	2.48998	2.29037	2.562	2.39405	2.49487	2.42699	2.49925	2.60908	2.54606	2.59114	2.77824	2.56253	2.46139	2.52344	2.78994	2.4963	2.32696	2.59341
TC0100001163.mm.1	2.37442	2.25238	2.37515	2.41909	2.36694	NONMMUT002547	NONMMUT002547	NA	2.36493	2.46489	2.42679	2.19734	2.41814	2.2662	2.167	2.33522	2.2411	2.30535	2.44218	2.32524	2.42782	2.45879	2.4739	2.35074	2.36624	2.4458	2.36619	2.52771	2.36979	2.21983	2.35117
TC0100001164.mm.1	2.93937	2.89965	2.90694	2.98906	3.00482	Fcamr	NM_001170632	Fc receptor, IgA, IgM, high affinity	2.98389	2.85277	2.96331	2.9635	2.93336	3.01739	2.95077	2.8489	2.78155	2.79399	2.88892	2.88906	3.05581	3.09859	2.96673	2.8948	3.03254	2.95265	2.92683	3.14076	2.95085	3.09465	2.91103
TC0100001165.mm.1	2.97204	2.98151	3.03585	3.0171	3.00908	Pigr	NM_011082	polymeric immunoglobulin receptor	2.99408	2.96877	2.94918	2.93057	3.01763	3.00585	2.99888	3.00885	2.91248	2.98238	2.98612	3.03352	3.1414	3.02377	2.96015	3.11367	3.00753	2.98039	2.94731	3.10863	3.04065	2.98316	2.96563
TC0100001166.mm.1	3.31148	3.20573	3.36993	3.45514	3.24642	Faim3	NM_026976	Fas apoptotic inhibitory molecule 3	3.32251	3.09654	3.28493	3.25515	3.59826	3.40514	3.17736	3.2411	2.99931	3.32217	3.52479	3.24666	3.38609	3.40945	3.2842	3.60155	3.57973	3.40076	3.06408	3.45412	3.20904	3.21939	3.28544
TC0100001167.mm.1	2.17659	2.08325	2.12218	2.07579	2.08404	Il10	NM_010548	interleukin 10	2.19497	2.19792	2.33467	2.06168	2.0937	2.1357	2.07444	2.03385	2.089	1.98964	2.13704	2.17704	2.18501	2.06168	2.01608	1.89502	2.18355	2.22263	2.0106	2.18412	2.02697	2.15031	2.04821
TC0100001168.mm.1	5.4907	5.55021	5.53118	5.53309	5.48655	Eif2d	NM_001136070	eukaryotic translation initiation factor 2D	5.59978	5.52748	5.4246	5.49905	5.40261	5.52506	5.48998	5.62236	5.56344	5.58789	5.51452	5.55764	5.46467	5.44703	5.64095	5.59824	5.59729	5.38193	5.55221	5.58452	5.40939	5.45248	5.43411
TC0100001169.mm.1	3.48451	3.49493	3.54983	3.55816	3.5039	NONMMUT002561	NONMMUT002561	NA	3.55711	3.39535	3.57666	3.3469	3.54653	3.48842	3.69558	3.70858	3.08715	3.35541	3.47617	3.50022	3.86751	3.57775	3.47182	3.52755	3.42777	3.78589	3.53302	3.86458	3.56183	3.21603	3.34406
TC0100001170.mm.1	1.98764	1.98426	2.11758	1.88943	1.91288	Fam72a	NM_175382	family with sequence similarity 72, member A	1.88466	1.97231	2.09849	1.99113	1.99163	1.85658	2.04925	1.97129	2.05992	2.30509	2.11515	1.96503	2.08506	1.75189	1.75298	1.97299	1.8385	2.13082	1.8766	1.83396	1.99036	1.85929	2.0042
TC0100001171.mm.1	3.10052	3.1666	3.18411	3.18568	3.1302	Avpr1b	NM_011924	arginine vasopressin receptor 1B	3.13189	3.10399	3.13584	3.09632	3.03454	3.18924	3.20256	3.21557	3.05904	2.922	3.1209	3.24185	3.45168	3.2928	3.00574	3.16419	3.32736	3.13831	3.15011	3.30036	3.17282	3.01277	3.01494
TC0100001172.mm.1	4.40923	3.82396	3.76651	3.98406	4.19557	Ctse	NM_007799	cathepsin E	4.05556	4.37257	5.42759	4.1642	4.02624	3.8125	3.93349	3.89696	3.6529	3.66253	3.76671	3.7054	3.93142	3.85042	3.88946	3.80025	4.2012	4.17899	3.75257	3.87017	4.68064	3.86065	4.81379
TC0100001173.mm.1	6.74138	6.44137	6.27598	6.1739	6.52297	5430435G22Rik	NM_145509	RIKEN cDNA 5430435G22 gene	6.05631	7.24809	7.28412	6.36548	6.75292	6.60399	6.32922	6.34721	6.48506	6.12861	6.2698	6.22527	6.48025	5.93577	6.15983	5.50557	6.45674	6.81159	6.49974	6.39606	6.86534	6.62196	6.23174
TC0100001174.mm.1	3.02251	2.98898	3.08459	3.05429	3.06945	Slc26a9	NM_177243	solute carrier family 26, member 9	3.0493	3.0475	3.03989	2.94182	3.03406	3.056	2.99298	3.00158	2.90537	2.9038	3.09595	3.01403	3.3246	3.11075	3.00678	3.02852	3.05225	3.07314	2.96399	3.14629	3.16665	3.10739	2.96291
TC0100001175.mm.1	3.0619	3.01752	3.06828	3.14282	3.40239	Pm20d1	NM_178079	peptidase M20 domain containing 1	3.21309	2.93433	2.96628	3.16682	3.029	3.01475	3.09684	2.99271	2.96576	3.16724	3.05392	2.95873	3.09323	3.03413	3.10041	3.13776	3.27798	3.16382	3.26651	3.56532	3.12274	3.53743	3.51994
TC0100001176.mm.1	6.40947	6.30824	6.5787	6.34354	6.37578	Slc41a1	NM_173865	solute carrier family 41, member 1	6.42757	6.65209	6.26981	6.36402	6.33386	6.32244	6.3143	6.36633	6.22987	6.65491	6.44038	6.56635	6.65316	6.35761	6.41711	6.2848	6.29423	6.36396	6.39404	6.44938	6.25182	6.47006	6.31359
TC0100001177.mm.1	6.95276	6.91345	6.80663	6.78794	6.89772	Rab29	NM_144875	RAB29, member RAS oncogene family	6.85348	7.16353	7.14983	6.7026	6.89434	6.90385	6.91233	6.91767	6.91994	6.79422	6.77499	6.81573	6.84157	6.65035	6.96713	6.56357	6.88551	6.87316	6.94308	6.84833	7.06281	6.84194	6.79242
TC0100001178.mm.1	7.5984	7.5673	7.61081	7.48722	7.57265	Nucks1	NM_001145804	nuclear casein kinase and cyclin-dependent kinase substrate 1	7.58818	7.56672	7.59433	7.67926	7.56353	7.54015	7.54044	7.52529	7.66331	7.62805	7.59205	7.58801	7.63512	7.53433	7.52565	7.45875	7.47333	7.44405	7.63561	7.32062	7.71655	7.5276	7.66287
TC0100001179.mm.1	3.30654	3.23935	3.24937	3.12641	3.08171	NONMMUT002577	NONMMUT002577	NA	3.10043	3.22474	3.2779	3.54316	3.38645	2.93971	3.39675	3.07463	3.54632	3.49941	2.91997	3.32137	3.25675	3.17585	3.02464	3.1324	3.1057	3.19347	3.12821	2.90634	3.06975	2.80634	3.49792
TC0100001180.mm.1	5.24023	5.27556	5.02892	5.31849	5.3002	Slc45a3	NM_001177628	solute carrier family 45, member 3	5.19049	5.27832	5.28067	5.20411	5.24756	5.26344	5.23575	5.30914	5.29388	5.02734	5.00301	5.01292	5.07241	5.1743	5.30441	5.40431	5.36073	5.34871	5.20411	5.40874	5.27313	5.37261	5.24241
TC0100001181.mm.1	7.26135	7.19447	7.21474	7.11977	7.11351	Elk4	NM_007923	ELK4, member of ETS oncogene family	7.18637	7.23469	7.2428	7.28203	7.36085	7.10445	7.17196	7.22558	7.2759	7.29415	7.1866	7.18634	7.19186	7.18019	7.08393	7.01708	7.16256	7.15507	7.16983	7.03966	7.09348	7.09672	7.16784
TC0100001182.mm.1	4.80197	4.7887	4.88921	4.89262	4.93624	Gm26892	ENSMUST00000181695	predicted gene, 26892	4.93912	4.78736	4.8667	4.6663	4.75038	4.79643	4.8795	4.8885	4.59038	4.87043	4.86336	4.76583	5.05721	4.96109	4.8797	4.98524	4.83494	4.80211	4.85715	5.05993	5.03016	4.87993	4.85405
TC0100001183.mm.1	1.25296	1.36685	1.3255	1.31443	1.30454	KnowTID_00000173	KnowTID_00000173	NA	1.37181	1.13599	1.16377	1.15045	1.44276	1.38082	1.336	1.31609	1.43448	1.43286	1.1527	1.27481	1.44163	1.22203	1.32233	1.26705	1.44158	1.31915	1.23743	1.35927	1.36796	1.21947	1.33854
TC0100001184.mm.1	1.97335	1.91917	1.98138	1.97669	1.93267	Gm26034	ENSMUST00000158154	predicted gene, 26034	2.12772	1.78516	2.07095	1.90788	1.97503	1.84418	1.84437	2.12449	1.86364	1.94209	2.07295	1.82243	2.08806	1.91859	2.01768	1.90913	1.96138	2.07665	1.90192	2.07312	1.92539	1.78014	1.98279
TC0100001185.mm.1	3.00824	2.92673	3.00406	2.97932	2.96427	KnowTID_00000174	KnowTID_00000174	NA	3.00103	2.99855	3.11396	2.92398	3.00368	2.98266	2.9736	3.02947	2.72119	2.97514	2.98034	2.98453	3.07623	2.9459	2.96676	2.90955	2.99264	3.08176	2.94209	2.98446	3.02928	2.87928	2.98627
TC0100001186.mm.1	2.557	2.51703	2.62362	2.56398	2.58159	Lemd1	NM_001033250	LEM domain containing 1	2.60186	2.55866	2.60373	2.49157	2.52918	2.49857	2.53009	2.60258	2.43688	2.50911	2.58521	2.62401	2.77614	2.58427	2.55938	2.53339	2.53552	2.60734	2.47818	2.65653	2.57674	2.60209	2.59441
TC0100001187.mm.1	2.26755	2.30412	2.19026	2.23774	2.25348	Mir135b	NR_029777	microRNA 135b	2.39099	1.89466	2.21317	2.34301	2.49592	2.30752	2.0316	2.50106	2.37629	2.17683	2.35306	2.0546	2.17656	2.27942	2.17014	2.33676	2.08421	2.31815	2.17601	2.29239	2.38679	2.31903	2.09317
TC0100001188.mm.1	3.51875	3.50129	3.38547	3.48582	3.49253	Gm7241	ENSMUST00000159853	predicted pseudogene 7241	3.55716	3.57709	3.46996	3.44137	3.54818	3.6441	3.58206	3.55469	3.22432	3.44133	3.39007	3.26282	3.44765	3.43115	3.66505	3.30708	3.55828	3.46755	3.51602	3.35692	3.65298	3.47358	3.46312
TC0100001189.mm.1	3.13538	3.16752	3.23907	3.20808	3.20949	Klhdc8a	NM_144810	kelch domain containing 8A	3.11749	3.18763	3.16574	3.19648	3.00956	3.10017	3.19945	3.3149	3.05558	3.11683	3.18889	3.2246	3.42594	3.24034	3.10851	3.24675	3.18597	3.25884	3.13976	3.29394	3.12093	3.37323	3.11959
TC0100001190.mm.1	4.26949	4.10483	4.07474	4.00509	4.10083	Nuak2	NM_001195025	NUAK family, SNF1-like kinase, 2	3.88193	4.64428	4.70002	3.96476	4.15648	4.10021	4.05083	4.1328	4.13547	3.93899	4.14314	3.98812	4.2287	3.86061	4.05948	3.70096	4.09206	4.31236	4.00535	4.19025	4.07818	4.17218	4.05819
TC0100001191.mm.1	4.56901	4.514	4.64163	4.52649	4.58678	F730311O21Rik	uc007coq.1	RIKEN cDNA F730311O21 gene	4.53634	4.44059	4.85093	4.52662	4.49057	4.42609	4.51477	4.6827	4.43246	4.50218	4.74886	4.57445	4.74102	4.60137	4.4295	4.39306	4.55815	4.65035	4.47607	4.79601	4.58282	4.44494	4.63404
TC0100001192.mm.1	3.36324	3.49532	3.55576	3.36056	3.38476	Gm15849	ENSMUST00000159257	predicted gene 15849	3.42082	3.14282	3.4365	3.24221	3.57387	3.50795	3.28537	3.5984	3.58958	3.56018	3.52785	3.33253	3.80249	3.54897	3.14779	3.4578	3.29157	3.35664	3.24407	3.54196	3.5198	3.28329	3.33468
TC0100001193.mm.1	5.85069	5.95692	5.89117	5.92852	5.85995	Dstyk	NM_172516	dual serine/threonine and tyrosine protein kinase	6.01671	5.86689	5.64987	5.84495	5.87504	5.88987	5.89613	5.96746	6.07419	5.91644	5.86582	5.95103	5.8314	5.8558	6.0256	5.92949	5.91021	5.92152	5.95924	5.86347	5.68317	5.90077	5.89309
TC0100001194.mm.1	3.5704	3.52448	3.32378	3.54878	3.41187	NONMMUT002608	NONMMUT002608	NA	3.4402	3.91904	3.18269	3.75689	3.55318	3.27245	3.487	3.50626	3.8322	3.30352	3.45098	3.25384	3.28676	3.53267	3.55206	3.74061	3.38137	3.53719	3.11398	3.37087	3.453	3.49393	3.62758
TC0100001195.mm.1	6.20431	6.27074	6.2452	6.13553	6.28025	Rbbp5	NM_172517	retinoblastoma binding protein 5	6.19296	6.16502	6.22096	6.24249	6.2001	6.14231	6.29636	6.19532	6.44899	6.30881	6.17473	6.23719	6.26006	6.0815	6.10662	6.03985	6.06404	6.3856	6.2386	6.19787	6.28468	6.3215	6.35858
TC0100001196.mm.1	3.34634	3.51255	3.29115	3.28772	3.22772	Tmem81	NM_029025	transmembrane protein 81	3.56523	3.32767	3.19803	3.17968	3.46107	3.59708	3.52077	3.39305	3.53931	3.37875	3.13081	3.31985	3.33521	3.02882	3.41139	3.29894	3.26994	3.42951	3.17076	3.39482	3.02514	3.31665	3.23124
TC0100001197.mm.1	2.44205	2.32124	2.48552	2.40384	2.42013	NONMMUT002620	NONMMUT002620	NA	2.43521	2.38056	2.43707	2.47623	2.48116	2.37321	2.17427	2.45787	2.27961	2.36756	2.61309	2.38574	2.5757	2.48145	2.35318	2.26364	2.366	2.55495	2.11558	2.47923	2.63005	2.45036	2.42543
TC0100001198.mm.1	2.8164	2.78694	2.7378	2.89051	2.75865	Gm10538	NR_045892	predicted gene 10538	2.78624	2.78436	2.98655	2.76674	2.75809	2.69517	3.0599	2.71958	2.67309	2.53393	2.91932	2.61887	2.87907	2.79603	2.8305	2.88878	2.91417	3.02307	2.55809	2.96813	2.59723	2.83726	2.83255
TC0100001199.mm.1	1.91811	1.92446	1.87314	1.91861	1.91052	NONMMUT002622	NONMMUT002622	NA	1.91796	1.87959	1.9088	1.8901	1.99408	1.93136	1.87986	2.03265	1.85396	1.77584	1.87415	1.92159	1.92098	2.0574	1.766	1.89669	1.9719	1.90106	1.95023	2.15405	1.85758	1.75639	1.83434
TC0100001200.mm.1	4.83282	4.81583	4.93585	4.96336	4.9916	Lrrn2	NM_010732	leucine rich repeat protein 2, neuronal	4.90042	4.80885	4.90012	4.75716	4.79753	4.80224	4.89644	4.85457	4.71007	4.75908	4.91587	4.8657	5.20275	4.92079	4.90738	5.06884	4.97459	4.94521	4.94899	5.07174	5.00138	4.94838	4.9875
TC0100001201.mm.1	5.88326	5.99099	5.95974	5.93249	5.77302	Pik3c2b	NM_001099276	phosphoinositide-3-kinase, class 2, beta polypeptide	6.06294	5.8532	5.76291	5.87954	5.85773	5.94719	6.02524	6.10549	5.88602	6.10879	5.86906	5.94322	5.91787	6.04943	5.99985	5.86224	5.83432	5.91662	5.80923	5.96546	5.51194	5.7878	5.79064
TC0100001202.mm.1	6.92057	6.87769	6.98413	6.80358	6.77143	Ppp1r15b	NM_133819	protein phosphatase 1, regulatory (inhibitor) subunit 15b	6.77981	6.96787	6.83471	6.99856	7.02189	6.79795	6.86519	6.94864	6.89899	7.06577	6.85526	6.9345	7.08099	6.86131	6.7249	6.6343	6.77376	7.0236	6.72871	6.75246	6.65266	6.77737	6.94593
TC0100001203.mm.1	2.66109	2.44363	2.55275	2.5333	2.52958	KnowTID_00000176	KnowTID_00000176	NA	2.68446	2.54381	2.62775	2.63706	2.81237	2.28352	2.53188	2.52682	2.43228	2.50499	2.47321	2.52947	2.70332	2.47272	2.55592	2.49903	2.53335	2.60551	2.47994	2.66732	2.57826	2.49123	2.43113
TC0100001204.mm.1	4.82177	4.99352	5.04509	5.09021	4.9787	Plekha6	NM_001160268	pleckstrin homology domain containing, family A member 6	5.11294	4.72722	4.8275	4.75387	4.68735	4.99029	5.04749	5.07608	4.86021	5.10701	4.91946	5.07789	5.07598	5.14268	4.93666	5.61442	4.88949	4.86781	4.98584	4.99537	5.09212	5.035	4.78516
TC0100001205.mm.1	3.9247	3.9142	3.97844	3.9886	3.96721	Golt1a	NM_026680	golgi transport 1 homolog A (S. cerevisiae)	3.9803	3.8133	3.95454	3.86932	4.00603	3.98951	3.95317	3.87897	3.83514	3.82482	3.95892	3.90785	4.22219	4.0246	3.94546	4.00149	3.97138	4.00007	3.86429	4.09875	3.9977	3.98798	3.88733
TC0100001206.mm.1	3.93041	3.73658	3.76107	3.83463	3.98605	Ren1	NM_031192	renin 1 structural	3.67653	3.89741	4.39841	3.81106	3.86864	3.86974	3.59141	3.7368	3.74836	3.79766	3.62459	3.80077	3.82126	3.64499	4.31521	3.52489	3.75839	3.92966	4.0508	3.79042	4.07639	3.92236	4.09027
TC0100001207.mm.1	3.55054	3.47129	3.54932	3.58185	3.55289	Etnk2	NM_175443	ethanolamine kinase 2	3.59656	3.52927	3.5826	3.5304	3.51384	3.5461	3.42329	3.52973	3.38603	3.4951	3.48315	3.52202	3.697	3.58468	3.5176	3.59084	3.63173	3.58442	3.41145	3.71876	3.60958	3.53943	3.48524
TC0100001208.mm.1	2.29946	2.08665	2.28536	2.22532	2.23566	Gm23939	ENSMUST00000082880	predicted gene, 23939	2.3378	2.37686	2.66064	2.24849	1.87353	2.1956	1.96208	2.17487	2.01404	2.54861	2.36851	2.21411	2.01021	2.1778	2.40085	2.11247	2.3953	2.04021	2.35112	2.01894	2.3201	2.23084	2.25729
TC0100001209.mm.1	2.49867	2.46249	2.492	2.541	2.49312	Gm26706	ENSMUST00000180718	predicted gene, 26706	2.46967	2.53996	2.52992	2.56741	2.38639	2.50558	2.51733	2.41549	2.41157	2.41941	2.55663	2.48057	2.5114	2.60294	2.51744	2.53832	2.59541	2.45089	2.4559	2.52213	2.49431	2.49979	2.49345
TC0100001210.mm.1	1.64706	1.56987	1.65485	1.61837	1.5507	KnowTID_00000178	KnowTID_00000178	NA	1.65875	1.65164	1.68099	1.59959	1.64433	1.5275	1.54438	1.66108	1.54652	1.60433	1.69572	1.62941	1.68995	1.55571	1.62528	1.64343	1.56929	1.69812	1.57848	1.65063	1.46965	1.60302	1.45173
TC0100001211.mm.1	1.64065	1.6918	1.69936	1.81185	1.70155	KnowTID_00000183	KnowTID_00000183	NA	1.54919	1.58145	1.58733	1.7563	1.72898	1.675	1.67577	1.7063	1.71012	1.67324	1.61901	1.73136	1.77383	1.83297	1.73428	1.89606	1.87267	1.72328	1.70605	1.7934	1.70197	1.60479	1.70155
TC0100001212.mm.1	2.93858	3.06088	3.16036	3.18108	3.0658	KnowTID_00000184	KnowTID_00000184	NA	3.19948	2.93522	2.91793	2.78719	2.85307	3.0991	3.07026	3.23581	2.83833	2.88891	3.24474	3.19602	3.31178	3.36562	3.20975	3.1621	3.1906	2.97733	3.04577	3.0355	3.02544	3.14552	3.07679
TC0100001213.mm.1	4.87215	4.88747	5.09564	4.9728	4.82951	Gm15851	ENSMUST00000160564	predicted gene 15851	5.04008	4.80005	4.32372	5.0917	5.10522	4.89325	4.79981	4.89325	4.96356	5.07454	5.03997	5.10029	5.16777	5.14052	5.09697	5.06454	4.88062	4.68135	5.07913	5.13384	4.68341	4.76755	4.48361
TC0100001214.mm.1	3.67301	3.68835	3.68314	3.70003	3.69147	NONMMUT002665	NONMMUT002665	NA	3.66285	3.58174	3.63469	3.76187	3.72392	3.78399	3.64182	3.67948	3.64811	3.5261	3.65894	3.50272	4.04482	3.61258	3.78635	3.65081	3.68627	3.76414	3.64734	3.85873	3.72659	3.54292	3.68178
TC0100001215.mm.1	2.16637	2.07635	2.18656	2.16325	2.18897	KnowTID_00000185	KnowTID_00000185	NA	2.06092	1.8462	2.26639	2.45626	2.20206	2.18094	1.89212	2.22614	2.00619	1.89217	2.17034	2.14342	2.54033	2.24949	2.05831	2.01249	2.09024	2.40573	2.1803	2.06099	2.30958	2.16939	2.22458
TC0100001216.mm.1	4.5215	4.82172	4.71097	4.57659	4.81154	NONMMUT002667	NONMMUT002667	NA	4.87738	4.33863	4.55837	4.59496	4.23816	4.60217	4.87469	4.94477	4.86526	4.67071	4.72612	4.78347	4.66357	4.46647	4.93114	4.34949	4.94338	4.19245	5.23106	4.67978	4.84662	4.65775	4.64251
TC0100001217.mm.1	2.40187	2.46168	2.4463	2.40268	2.60649	KnowTID_00000186	KnowTID_00000186	NA	2.56136	1.97628	2.46596	2.39075	2.61503	2.27174	2.49432	2.5675	2.51315	2.471	2.33845	2.76106	2.21468	2.62203	2.50142	2.46416	2.18861	2.2372	2.83938	2.55208	2.38681	2.73525	2.51891
TC0100001218.mm.1	7.01027	7.57414	7.54101	7.35597	7.42477	Fmod	NM_021355	fibromodulin	7.46651	6.65828	6.93753	7.11036	6.87868	7.719	7.35652	7.47541	7.74561	7.48866	7.74023	7.52107	7.41406	7.31734	7.41756	7.38596	7.26844	7.39056	7.40575	7.56663	7.97372	7.24234	6.93539
TC0100001219.mm.1	10.5028	10.4562	10.4281	10.489	10.4854	Gm8618	XM_990438	predicted gene 8618	10.5188	10.4953	10.6647	10.5333	10.3021	10.5512	10.4858	10.4638	10.3237	10.4554	10.3649	10.443	10.4491	10.5325	10.481	10.3854	10.5488	10.4972	10.5036	10.5183	10.5306	10.4063	10.4681
TC0100001220.mm.1	2.7026	2.7613	2.80118	2.74965	2.77663	Chit1	NM_001284524	chitinase 1 (chitotriosidase)	2.82279	2.72003	2.70239	2.62609	2.64169	2.7756	2.7355	2.86246	2.67165	2.74494	2.79719	2.73152	2.93107	2.77853	2.70861	2.73604	2.79935	2.72572	2.67873	2.94261	2.81686	2.74701	2.69793
TC0100001221.mm.1	5.13445	4.95014	5.03946	5.21315	5.11826	NONMMUT002673	NONMMUT002673	NA	5.15705	5.17826	5.21245	5.07623	5.04827	4.97426	5.06003	4.98462	4.78165	4.95397	5.13339	5.05439	5.01609	5.46347	5.09674	5.12677	5.21761	5.16116	4.96803	5.29249	5.09763	5.09978	5.13337
TC0100001222.mm.1	3.21965	3.18875	3.32252	3.21355	3.28957	Chil1	NM_007695	chitinase-like 1	3.18894	3.11405	3.26248	3.36862	3.16416	3.16248	3.24929	3.22335	3.11989	3.14024	3.3018	3.18813	3.65992	3.24573	3.18407	3.23418	3.20838	3.19539	3.19823	3.3709	3.36119	3.29601	3.22154
TC0100001223.mm.1	3.86694	3.82198	3.85731	3.89585	3.92178	Mybph	NM_016749	myosin binding protein H	3.95944	3.80979	3.83125	3.86192	3.8723	3.81265	3.90184	3.80289	3.77055	3.79439	3.84337	3.83707	3.95441	3.97394	3.90964	3.89968	3.86399	3.83202	3.83164	4.00257	3.89621	3.93473	3.94377
TC0100001224.mm.1	3.41325	3.46607	3.67698	3.54821	3.51996	NONMMUT002676	NONMMUT002676	NA	3.26934	3.54253	3.4074	3.53576	3.31122	3.41217	3.35823	3.63838	3.4555	3.57879	3.79135	3.66718	3.6706	3.58484	3.43954	3.6113	3.58301	3.52237	3.58249	3.81406	3.5045	3.42468	3.27408
TC0100001225.mm.1	4.05321	4.07432	4.23032	4.18576	4.25032	Myog	NM_031189	myogenin	4.13965	3.95578	3.98259	4.03562	4.15244	4.14338	4.1218	4.15808	3.87402	4.07365	4.26941	4.14976	4.42847	4.30231	4.20986	4.17172	4.15331	4.09159	4.09322	4.46866	4.31676	4.1917	4.18128
TC0100001226.mm.1	2.22822	2.31543	2.2841	2.25918	2.24364	4933406M09Rik	NM_173771	RIKEN cDNA 4933406M09 gene	2.36439	2.16679	2.09371	2.26307	2.25311	2.31274	2.37639	2.25664	2.31597	2.2469	2.3856	2.06781	2.43607	2.36215	2.2882	2.23083	2.25874	2.15596	2.26906	2.35645	2.10685	2.26217	2.22364
TC0100001227.mm.1	5.36912	5.44692	5.32281	5.27356	5.30479	Cyb5r1	NM_028057	cytochrome b5 reductase 1	5.37596	5.43436	5.38214	5.3251	5.32806	5.50196	5.43061	5.40646	5.44863	5.3811	5.20039	5.37502	5.33472	5.16937	5.28594	5.29533	5.29693	5.32024	5.30501	5.28067	5.33506	5.32508	5.27813
TC0100001228.mm.1	7.46253	7.34785	7.31378	7.40231	7.40542	Adipor1	NM_028320	adiponectin receptor 1	7.33972	7.38305	7.71943	7.38226	7.48816	7.41028	7.32813	7.32463	7.32838	7.27221	7.29062	7.32114	7.37117	7.43259	7.38253	7.29863	7.40323	7.4946	7.31479	7.42083	7.45605	7.39304	7.44237
TC0100001229.mm.1	2.41417	2.51518	2.49486	2.43781	2.43408	KnowTID_00000187	KnowTID_00000187	NA	2.31562	2.35854	2.48474	2.36984	2.54213	2.49849	2.59212	2.50509	2.46502	2.57045	2.49444	2.63142	2.28314	2.50946	2.39526	2.37373	2.52116	2.38946	2.54504	2.6045	2.181	2.40459	2.43529
TC0100001230.mm.1	4.43573	4.54716	4.46513	4.49784	4.42106	Klhl12	NM_153128	kelch-like 12	4.43429	4.32388	4.41371	4.56463	4.44213	4.48854	4.52982	4.49529	4.67498	4.58493	4.4028	4.45254	4.42026	4.378	4.49072	4.63101	4.50629	4.48318	4.42307	4.44642	4.38252	4.34023	4.51305
TC0100001231.mm.1	7.08279	7.28901	7.19486	7.08945	7.16784	Rabif	NM_145510	RAB interacting factor	7.15711	7.18054	7.07223	7.04759	6.95649	7.29955	7.28591	7.23519	7.3354	7.27453	7.0673	7.17747	7.26016	6.91538	7.14981	7.03678	7.09254	7.25273	7.22725	7.27935	7.00655	7.17458	7.15146
TC0100001232.mm.1	2.34353	2.45065	2.43641	2.37322	2.40768	Gm25612	ENSMUST00000104014	predicted gene, 25612	2.17884	2.31597	2.48836	2.27192	2.46257	2.46555	2.35784	2.46919	2.51001	2.53681	2.39874	2.26361	2.54646	2.44027	2.23956	1.99693	2.71692	2.47242	2.06381	2.36906	2.5355	2.45922	2.61081
TC0100001233.mm.1	8.15633	8.1078	8.1247	8.12496	8.11293	Gm15454	ENSMUST00000179718	predicted gene 15454	8.10009	8.12908	8.29057	8.07548	8.18642	8.14499	8.07746	8.10393	8.10484	8.06111	8.11377	8.01444	8.30946	8.22825	8.07024	8.05995	8.17077	8.0956	8.11774	8.1907	8.21366	8.07093	7.9716
TC0100001234.mm.1	6.42762	6.42113	6.47097	6.44701	6.31266	Kdm5b	NM_152895	lysine (K)-specific demethylase 5B	6.49282	6.43821	6.20439	6.54927	6.45343	6.33308	6.41005	6.40644	6.53495	6.59462	6.36822	6.56635	6.35469	6.421	6.53665	6.48325	6.38859	6.40556	6.42114	6.3268	6.09843	6.35469	6.36226
TC0100001235.mm.1	3.30761	3.40729	3.47447	3.51562	3.34085	NONMMUT002686	NONMMUT002686	NA	3.21217	3.5883	3.00559	3.41353	3.31845	3.18056	3.69105	3.41372	3.34384	3.52101	3.66726	3.32208	3.38751	3.68696	3.2983	3.52414	3.50902	3.55969	3.43021	3.41122	3.16644	3.17782	3.51856
TC0100001236.mm.1	2.614	2.77547	2.73222	2.69684	2.74843	NONMMUT002687	NONMMUT002687	NA	2.43129	2.81968	2.86585	2.63477	2.31843	2.6282	2.57947	3.06953	2.82466	2.81633	2.95677	2.56904	2.58673	2.76126	2.72215	2.44046	2.6934	2.86692	2.56398	2.74321	2.73453	2.53396	3.16649
TC0100001237.mm.1	3.33034	3.31812	3.39548	3.53475	3.49318	Syt2	NM_009307	synaptotagmin II	3.38001	3.22638	3.45909	3.24745	3.33876	3.31914	3.31082	3.37166	3.27087	3.23383	3.38432	3.30835	3.65542	3.46643	3.31221	4.14503	3.34034	3.40973	3.29264	3.49676	3.73647	3.58832	3.3517
TC0100001238.mm.1	7.9335	7.91026	7.92754	7.98573	7.98859	Gm22232	ENSMUST00000104654	predicted gene, 22232	7.74506	7.9862	7.97411	7.92738	8.03476	7.85589	8.03925	7.9067	7.83921	7.65861	8.15608	7.79855	8.09693	8.26933	8.025	7.98135	7.85461	7.79838	7.94047	8.12416	8.10506	7.83463	7.93862
TC0100001239.mm.1	1.87425	1.99778	1.94399	1.85668	1.86102	NONMMUT002700	NONMMUT002700	NA	1.84198	1.81191	1.861	1.84532	2.01102	1.93136	2.11487	1.93857	2.00632	1.82778	1.90149	1.99415	2.05254	1.84312	1.92394	1.91849	1.80347	1.79437	1.81348	1.96118	1.90237	1.80619	1.82189
TC0100001240.mm.1	2.17527	2.19701	2.18384	2.23585	2.26612	Ube2t	NM_001278115	ubiquitin-conjugating enzyme E2T (putative)	2.17847	2.21402	2.24458	2.12403	2.11525	2.27509	2.23398	2.21624	2.06275	2.07558	2.17565	2.09322	2.39092	2.21866	2.1897	2.16861	2.16859	2.43371	2.15942	2.34866	2.45828	2.20235	2.16191
TC0100001241.mm.1	5.73571	5.86799	6.14661	6.04822	5.65166	NONMMUT002706	NONMMUT002706	NA	6.22119	5.62251	4.77626	6.06795	5.99065	5.73206	5.82291	6.10711	5.80989	6.30074	6.15461	6.10523	6.02588	6.02152	5.95255	6.17131	5.98348	6.11222	5.89827	6.07463	5.1473	5.65495	5.48312
TC0100001242.mm.1	4.03	4.16763	4.24894	4.2054	3.93865	NONMMUT002707	NONMMUT002707	NA	4.15916	3.98146	3.87297	4.04977	4.08662	4.26681	4.25444	4.10059	4.04869	4.40961	4.22985	4.01969	4.33662	4.22765	4.11407	4.32847	4.12845	4.22835	3.88653	4.28113	3.64398	3.82404	4.0576
TC0100001243.mm.1	2.9867	2.99938	3.04079	2.99851	3.13484	Gm10535	XR_106095	predicted gene 10535	2.95902	2.8886	3.05318	2.87428	3.15839	3.1352	3.04209	2.94052	2.87972	2.96591	3.05353	2.86964	3.27407	3.12144	3.06004	2.96862	2.87513	2.96731	2.85025	3.38405	3.34854	3.20137	2.88997
TC0100001244.mm.1	4.82372	4.67051	4.5656	4.56789	4.64712	Ptpn7	NM_177081	protein tyrosine phosphatase, non-receptor type 7	4.49344	5.26738	5.09996	4.5754	4.68243	4.58575	4.767	4.64985	4.67945	4.44976	4.53958	4.46271	4.81037	4.54131	4.47117	4.33248	4.65448	4.84	4.52895	4.73553	4.67825	4.64389	4.64901
TC0100001245.mm.1	7.30385	7.17194	7.14332	7.25341	7.17864	Arl8a	NM_026823	ADP-ribosylation factor-like 8A	7.1517	7.46821	7.32509	7.20809	7.36614	7.22775	7.13041	7.10959	7.22001	7.21625	7.06801	7.13544	7.1536	7.13791	7.18404	7.43847	7.13995	7.36668	7.06581	7.20258	7.2379	7.26681	7.12008
TC0100001246.mm.1	4.29399	4.03274	4.22416	4.13039	4.05444	Gm15445	ENSMUST00000146700	predicted gene 15445	3.77279	4.60925	4.50935	4.3138	4.26478	3.99178	4.22151	4.13448	3.78317	4.29796	4.39551	4.13771	4.06545	4.15514	4.14149	4.27486	4.08395	3.9965	3.95977	3.80735	4.19816	3.99729	4.30961
TC0100001247.mm.1	9.11694	9.05723	9.19323	9.01663	9.06237	Gm4204	ENSMUST00000110798	predicted gene 4204	8.98907	8.95326	9.15239	9.27454	9.21545	8.98777	9.07491	9.0402	9.12606	9.13913	9.17016	9.16442	9.29919	9.22088	9.00589	8.99387	8.9296	8.93291	9.13822	8.87155	9.25387	9.03856	9.00964
TC0100001248.mm.1	3.92117	3.81666	3.87362	3.81942	3.92979	Rnpep	ENSMUST00000180981	arginyl aminopeptidase (aminopeptidase B)	3.96147	3.96072	3.8827	3.81031	3.99067	3.83455	3.78549	3.72284	3.92378	3.89766	3.7242	3.77509	4.09754	3.88761	3.77866	3.90664	3.78505	3.73915	4.01259	4.01057	3.82054	3.93257	3.87267
TC0100001249.mm.1	8.53174	8.83751	8.80532	8.90188	8.35599	Lmod1	NM_053106	leiomodin 1 (smooth muscle)	9.01042	8.38721	7.601	8.78793	8.87216	8.80451	8.83715	8.95263	8.75576	8.99625	8.7384	8.8488	8.63781	8.79235	9.10488	8.9739	8.85555	8.78274	8.75141	8.54546	7.76279	8.39049	8.32981
TC0100001250.mm.1	5.45803	5.39535	5.55318	5.50225	5.46878	NONMMUT002737	NONMMUT002737	NA	5.49164	5.54691	5.42371	5.43032	5.39755	5.44858	5.41582	5.4767	5.24031	5.46371	5.52343	5.57528	5.6503	5.63426	5.45364	5.62765	5.46359	5.33209	5.4461	5.64847	5.3588	5.45382	5.4367
TC0100001251.mm.1	3.65598	3.6435	3.7554	3.59893	3.63583	Gm4793	ENSMUST00000067468	predicted gene 4793	3.81769	3.69258	3.67823	3.48474	3.60667	3.64752	3.61328	3.68437	3.62884	3.55729	3.8203	3.73529	3.90874	3.69883	3.5929	3.61587	3.55387	3.53316	3.54207	3.83109	3.51652	3.65251	3.63693
TC0100001252.mm.1	10.0037	10.1124	10.1255	10.0987	9.9257	Csrp1	NM_007791	cysteine and glycine-rich protein 1	10.1434	10.0189	9.65424	10.0413	10.1608	10.0504	10.0648	10.2468	10.0878	10.1919	10.06	10.1671	10.0832	10.1303	10.15	10.1134	10.0543	10.0456	10.1127	10.0264	9.63293	9.97495	9.88161
TC0100001253.mm.1	3.13823	3.16168	3.1251	3.17089	3.26208	NONMMUT002750	NONMMUT002750	NA	3.17434	3.13695	3.1463	3.01656	3.21702	3.05404	3.22488	3.28304	3.08478	3.17483	3.17697	2.80264	3.34597	3.11018	3.15939	3.33376	3.14907	3.10205	3.14287	3.20436	3.35035	3.35803	3.25481
TC0100001254.mm.1	5.84093	5.79998	5.82069	5.88665	5.91522	Phlda3	NM_013750	pleckstrin homology-like domain, family A, member 3	5.92687	5.74587	5.71427	5.85772	5.95992	5.83868	5.88921	5.75992	5.7121	5.78398	5.79217	5.79974	5.90686	5.87247	5.83668	5.75525	5.79842	6.17044	5.73457	5.99236	5.95425	5.94686	5.94805
TC0100001256.mm.1	4.26104	4.20821	4.35536	4.33694	4.29922	Lad1	NM_133664	ladinin	4.4014	4.18624	4.31839	4.13848	4.26071	4.28552	4.25246	4.28239	4.01248	4.15062	4.31623	4.31549	4.63908	4.33878	4.29079	4.39593	4.26898	4.39024	4.15441	4.47413	4.27416	4.26356	4.32986
TC0100001257.mm.1	6.70936	6.60307	6.80281	6.95274	7.06734	Tnnt2	NM_001130174	troponin T2, cardiac	6.6348	6.19395	6.56314	7.26117	6.89373	6.7532	6.34869	6.63467	6.67572	6.65337	7.10358	6.56503	6.88926	7.09526	6.97351	6.8617	6.78638	7.04682	6.58858	6.47294	6.27171	9.40463	6.59884
TC0100001258.mm.1	5.59455	5.56857	5.63294	5.70146	5.64044	Tmem9	NM_001160145	transmembrane protein 9	5.73223	5.65296	5.56775	5.54236	5.47747	5.5889	5.57689	5.66204	5.44644	5.63157	5.57403	5.6486	5.67755	5.66645	5.72828	5.78287	5.71052	5.61917	5.61913	5.71627	5.65654	5.63876	5.57146
TC0100001259.mm.1	4.34761	4.35392	4.46899	4.41442	4.40798	Ascl5	NM_001270609	achaete-scute complex homolog 5 (Drosophila)	4.48891	4.19136	4.42856	4.1968	4.43245	4.26825	4.37528	4.477	4.29514	4.28262	4.62179	4.31758	4.65397	4.51619	4.4097	4.21068	4.41123	4.52431	4.30069	4.47032	4.39038	4.54205	4.33643
TC0100001260.mm.1	3.46149	3.52388	3.63711	3.58086	3.53221	Cacna1s	NM_001081023	calcium channel, voltage-dependent, L type, alpha 1S subunit	3.53812	3.49848	3.40254	3.4597	3.4086	3.53175	3.52027	3.49768	3.54583	3.76403	3.52758	3.5543	3.70255	3.77205	3.49998	3.65398	3.48176	3.49652	3.45894	3.65864	3.47366	3.53825	3.53154
TC0100001261.mm.1	2.06883	2.14558	2.08815	2.03144	2.1791	NONMMUT002757	NONMMUT002757	NA	2.10972	2.0873	2.05305	2.14175	1.95231	2.17873	2.23733	2.05823	2.10803	2.15518	2.08248	1.98993	2.12501	2.16665	1.84737	1.99797	2.06285	2.08234	2.30563	2.20204	2.09244	2.26363	2.03174
TC0100001262.mm.1	4.7861	4.70551	4.7429	4.74909	4.68509	Kif21b	NM_001039472	kinesin family member 21B	4.82503	4.93654	4.78587	4.70227	4.68081	4.77171	4.66389	4.73484	4.65159	4.68259	4.74411	4.67645	4.86844	4.72859	4.73293	4.69802	4.88473	4.70117	4.71903	4.84939	4.61643	4.6478	4.59281
TC0100001263.mm.1	2.13236	2.2443	2.23622	2.21058	2.16023	NONMMUT002763	NONMMUT002763	NA	2.11782	2.2205	2.08013	2.13961	2.10375	2.11026	2.28962	2.37487	2.20244	2.19914	2.22734	2.20021	2.3182	2.04459	1.94955	2.23035	2.39063	2.43779	2.2304	2.24749	2.16867	1.96978	2.18481
TC0100001264.mm.1	2.47492	2.59572	2.6755	2.71044	2.48242	Gm26568	ENSMUST00000180496	predicted gene, 26568	2.571	2.33591	2.51343	2.53148	2.4228	2.47442	2.80982	2.65377	2.44485	2.52176	2.50455	2.87262	2.80305	2.61131	2.78501	2.70682	2.61398	2.83506	2.47013	2.64098	2.3235	2.42619	2.5513
TC0100001265.mm.1	1.75705	1.84601	1.83359	1.78743	1.69632	KnowTID_00000188	KnowTID_00000188	NA	1.60916	2.01777	1.7868	1.60147	1.77006	1.69182	1.7245	1.88119	2.08652	1.74613	1.76751	1.72044	2.10028	1.75147	1.79238	1.63473	1.81442	1.94417	1.73481	1.78553	1.5095	1.7001	1.75163
TC0100001266.mm.1	3.99682	4.03872	3.93133	4.12378	3.98509	Gm26781	ENSMUST00000181385	predicted gene, 26781	4.03021	3.8722	4.07626	3.91621	4.08923	4.05687	4.07928	4.14838	3.87035	3.87603	3.98285	3.97176	3.8947	4.17763	4.19982	4.07247	4.02939	4.13959	3.93638	3.9024	4.06076	4.06397	3.96196
TC0100001267.mm.1	2.13266	2.08947	2.15997	2.22331	2.25512	NONMMUT002774	NONMMUT002774	NA	2.16655	1.95924	2.21354	2.1924	2.13155	2.20098	2.04176	2.14607	1.96905	1.99424	2.10703	2.49336	2.04523	2.16159	2.266	2.33951	2.10855	2.24089	2.32721	2.44947	1.98279	2.24167	2.27445
TC0100001268.mm.1	5.52437	5.50662	5.54306	5.52981	5.47371	Ddx59	NM_026500	DEAD (Asp-Glu-Ala-Asp) box polypeptide 59	5.52475	5.50146	5.47107	5.58095	5.5436	5.5172	5.51154	5.61645	5.3813	5.54724	5.5239	5.55614	5.54497	5.49087	5.61109	5.5392	5.60103	5.40685	5.51867	5.49186	5.37161	5.43159	5.55484
TC0100001269.mm.1	2.13486	2.12054	2.27015	2.18851	2.19703	NONMMUT002777	NONMMUT002777	NA	2.10646	2.06667	2.19249	2.08396	2.22473	2.13483	2.19518	2.15148	2.00066	2.26318	2.35773	2.26726	2.19243	2.33151	2.14663	1.993	2.27299	2.19844	2.09027	2.02615	2.4452	2.21541	2.20811
TC0100001270.mm.1	1.71932	1.95345	1.98723	1.77769	1.84582	NONMMUT002779	NONMMUT002779	NA	1.78134	1.6027	1.82412	1.58308	1.80535	1.93476	1.90276	1.94839	2.02789	2.07613	2.00749	1.8386	2.02672	1.76758	1.81292	1.78098	1.62907	1.8979	1.90155	1.91232	1.71379	1.90482	1.7966
TC0100001271.mm.1	2.69632	2.60327	2.61113	2.59442	2.64085	Kif14	NM_001081258	kinesin family member 14	2.56251	2.89094	2.79258	2.55416	2.6814	2.56532	2.6325	2.68071	2.53453	2.52511	2.6099	2.59511	2.71439	2.49816	2.62946	2.57472	2.61534	2.65441	2.67951	2.69908	2.6248	2.5915	2.60935
TC0100001272.mm.1	2.2167	2.16879	2.1529	2.19268	2.28792	KnowTID_00000189	KnowTID_00000189	NA	2.14257	2.21958	2.28602	2.15498	2.28034	2.0926	2.14051	2.1158	2.32625	1.93636	2.24631	2.03994	2.38897	2.47669	2.20464	2.181	2.0206	2.08045	2.3028	2.29019	2.39461	2.2069	2.24508
TC0100001273.mm.1	1.24549	1.11557	1.24893	1.19578	1.25763	KnowTID_00000192	KnowTID_00000192	NA	1.46002	1.24111	1.23599	1.21582	1.0745	1.06537	1.14387	1.06347	1.18957	1.21839	1.26295	1.15625	1.35815	1.18473	1.11785	1.33781	0.987352	1.35116	1.31262	1.28556	1.299	1.26293	1.12805
TC0100001274.mm.1	5.67934	5.67306	5.68723	5.6506	5.52874	Zfp281	NM_001160251	zinc finger protein 281	5.46394	5.8605	5.55068	5.76949	5.75209	5.50463	5.79946	5.74075	5.6474	5.64787	5.64275	5.63443	5.82388	5.57164	5.67567	5.75291	5.62054	5.63225	5.57423	5.57494	5.31101	5.60482	5.57869
TC0100001275.mm.1	3.82896	3.85932	3.86099	3.8682	3.8794	Gm19705	NR_045324	predicted gene, 19705	3.87809	3.7806	3.8651	3.87898	3.74202	3.84729	3.87214	3.88068	3.83717	3.78402	3.90569	3.83796	3.91631	3.93052	3.86392	3.83904	3.86892	3.83861	3.93413	3.91868	3.84763	3.8836	3.81294
TC0100001276.mm.1	1.92154	1.85072	1.92308	1.87377	1.87566	Gm16880	NR_037986	predicted gene, 16880	1.8649	2.0168	1.89437	1.8625	1.96916	1.84728	1.9107	1.87582	1.76908	1.94578	1.82745	1.91243	2.00664	1.9803	1.79421	1.85558	1.86688	1.87191	1.73936	1.94479	1.99173	1.83875	1.86368
TC0100001277.mm.1	4.37357	4.34165	4.5272	4.36932	4.43843	Gm24086	ENSMUST00000175171	predicted gene, 24086	4.38568	4.41507	4.43294	4.33997	4.29418	4.38408	4.25043	4.35575	4.37634	4.60445	4.467	4.55348	4.48386	4.28653	4.35814	4.35849	4.45685	4.38661	4.38859	4.40663	4.51607	4.36902	4.51182
TC0100001278.mm.1	1.47262	1.5792	1.57834	1.51914	1.54039	KnowTID_00000290	KnowTID_00000290	NA	1.60477	1.52228	1.47357	1.27131	1.49118	1.47819	1.70867	1.61559	1.51436	1.77397	1.42825	1.52281	1.58832	1.45015	1.65162	1.42557	1.52587	1.54248	1.58362	1.65798	1.56597	1.38865	1.50571
TC0100001279.mm.1	1.36002	1.32049	1.40529	1.31697	1.47181	Gm22727	ENSMUST00000158090	predicted gene, 22727	1.23597	1.28344	1.55711	1.43057	1.29301	1.40084	1.2916	1.33879	1.25073	1.23361	1.59422	1.41264	1.3807	1.23663	1.28958	1.26497	1.53863	1.25502	1.41388	1.55158	1.40699	1.5546	1.43201
TC0100001280.mm.1	1.68486	1.64733	1.65383	1.70528	1.65032	NONMMUT002906	NONMMUT002906	NA	1.72614	1.70033	1.71331	1.64724	1.63726	1.57324	1.70819	1.61904	1.68886	1.64264	1.66478	1.60917	1.69873	1.79408	1.67264	1.66263	1.75091	1.64616	1.57146	1.64322	1.62766	1.75726	1.65203
TC0100001281.mm.1	1.92969	1.91704	1.96017	1.94622	1.94675	KnowTID_00000291	KnowTID_00000291	NA	1.98198	1.98575	1.99101	1.73839	1.9513	1.92986	1.81728	1.92329	1.99773	1.91007	1.84681	2.09737	1.98642	2.07017	1.94427	1.85157	1.89289	1.97217	1.95831	2.0349	1.99581	1.99779	1.74694
TC0100001282.mm.1	2.37766	2.37388	2.33827	2.30723	2.27366	Gm4258	ENSMUST00000182127	predicted gene 4258	2.34468	2.46783	2.31686	2.41524	2.34367	2.33081	2.34444	2.34623	2.47402	2.33351	2.41626	2.28681	2.3165	2.31097	2.31368	2.29395	2.31322	2.30431	2.37615	2.26177	2.16198	2.21963	2.34879
TC0100001283.mm.1	3.43443	3.37039	3.42232	3.30865	3.19578	KnowTID_00000294	KnowTID_00000294	NA	3.16483	3.73349	2.98417	3.73119	3.55849	3.35582	3.34669	3.10591	3.67314	3.52422	3.64513	3.47741	3.04254	3.28521	3.10862	3.2061	3.36283	3.58047	3.39512	3.07517	2.89058	3.11037	3.50767
TC0100001284.mm.1	2.92294	2.87014	2.70251	2.63342	2.7214	KnowTID_00000295	KnowTID_00000295	NA	2.86603	3.28845	2.67225	2.83614	2.95181	2.90519	3.03846	2.95639	2.58051	2.65788	2.89218	2.69259	2.5674	3.0835	2.33795	2.51727	2.64893	2.57945	2.75091	2.98266	2.48239	2.52402	2.867
TC0100001285.mm.1	1.70497	1.73331	1.82594	1.71285	1.73512	A130050O07Rik	XR_106099	RIKEN cDNA A130050O07 gene	1.55743	1.77183	1.63017	1.88818	1.67726	1.86818	1.60655	1.67011	1.78838	1.83015	1.84271	1.85231	1.77861	1.63908	1.75772	1.7467	1.87297	1.54777	1.74919	1.68529	1.61098	1.71064	1.91952
TC0100001286.mm.1	3.02908	3.20486	3.09581	2.97702	2.86103	KnowTID_00000297	KnowTID_00000297	NA	3.08369	2.92245	2.89444	3.15472	3.09009	3.01224	3.4483	3.1699	3.18902	3.05272	3.01672	3.08292	3.23088	3.25914	2.96999	2.80413	2.94697	2.90485	2.9123	2.98525	2.66261	2.88688	2.85811
TC0100001287.mm.1	3.64082	3.84326	3.78115	3.40641	3.48802	KnowTID_00000299	KnowTID_00000299	NA	3.4501	3.89767	3.71545	3.58803	3.55282	3.8237	3.78783	3.56757	4.19394	3.92337	4.02714	3.64373	3.53037	3.70402	3.59403	2.87754	3.3297	3.52679	3.49219	3.33251	3.64237	3.27565	3.69737
TC0100001288.mm.1	2.63466	2.61885	2.58382	2.52474	2.54076	Mir181a-1	NR_029795	microRNA 181a-1	2.756	2.51485	2.58925	2.68843	2.62476	2.65258	2.62561	2.69647	2.50076	2.60866	2.55259	2.55826	2.61577	2.44342	2.64017	2.37667	2.59964	2.56377	2.59178	2.41148	2.62374	2.69586	2.38093
TC0100001289.mm.1	1.6775	1.65299	1.7139	1.76573	1.64849	KnowTID_00000300	KnowTID_00000300	NA	1.73049	1.74843	1.66483	1.71478	1.52898	1.56143	1.76101	1.58685	1.70267	1.784	1.62589	1.7335	1.7122	1.68015	1.81818	1.74186	1.64039	1.94805	1.8856	1.59838	1.61892	1.43014	1.70943
TC0100001290.mm.1	1.49466	1.54123	1.53909	1.57451	1.53296	NONMMUT002950	NONMMUT002950	NA	1.59701	1.52901	1.43488	1.57585	1.33656	1.54908	1.49594	1.5238	1.59608	1.55913	1.49892	1.59792	1.50038	1.59078	1.51788	1.6252	1.60689	1.53182	1.57032	1.36119	1.7619	1.48979	1.48157
TC0100001291.mm.1	1.68656	1.77001	1.81443	1.84532	1.63974	KnowTID_00000301	KnowTID_00000301	NA	1.67746	1.66316	1.69443	1.67767	1.72011	1.85169	1.75898	1.7046	1.76475	1.62904	1.89712	1.76964	1.96192	1.79512	1.6375	1.9514	1.83915	2.00343	1.48987	1.86785	1.69601	1.55312	1.59186
TC0100001292.mm.1	2.43133	2.41447	2.48078	2.45172	2.4752	Atp6v1g3	NM_177397	ATPase, H+ transporting, lysosomal V1 subunit G3	2.47682	2.46321	2.5572	2.36684	2.29259	2.47652	2.37193	2.34655	2.46287	2.36136	2.60503	2.47026	2.48645	2.43524	2.36736	2.53047	2.45405	2.47148	2.44119	2.54621	2.47403	2.42679	2.48777
TC0100001293.mm.1	2.45376	2.57231	2.6234	2.52668	2.51684	NONMMUT002952	NONMMUT002952	NA	2.73801	2.43088	2.2926	2.41622	2.39111	2.59853	2.63579	2.65966	2.39526	2.51342	2.71849	2.52812	2.73355	2.64591	2.41112	2.58734	2.45417	2.53486	2.36992	2.64179	2.56891	2.51885	2.48472
TC0100001294.mm.1	5.69081	5.62935	5.54017	5.48584	5.5759	Dennd1b	NM_001166501	DENN/MADD domain containing 1B	5.43388	5.74337	5.95842	5.58568	5.7327	5.61488	5.58896	5.58455	5.72902	5.51938	5.58396	5.53806	5.51927	5.46135	5.45449	5.23212	5.56855	5.71271	5.62193	5.47665	5.63382	5.60847	5.53862
TC0100001295.mm.1	3.22312	3.23379	3.07053	3.15337	3.13356	NONMMUT002968	NONMMUT002968	NA	2.80793	3.41139	3.19261	3.18566	3.51801	3.13067	3.36145	3.15858	3.28444	3.05371	3.2297	3.03085	2.96788	3.20455	2.97439	2.96192	3.48409	3.14188	2.96723	3.25354	2.96024	3.19359	3.29321
TC0100001296.mm.1	1.75473	1.64425	1.70138	1.67293	1.65256	4930596I21Rik	NR_108103	RIKEN cDNA 4930596I21 gene	1.738	1.79763	1.65529	1.84742	1.73531	1.56282	1.5953	1.67113	1.74776	1.61196	1.80481	1.94799	1.44075	1.9207	1.6562	1.53616	1.613	1.6386	1.71359	1.6711	1.60846	1.60201	1.66766
TC0100001297.mm.1	3.45132	3.58453	3.4646	3.4386	3.32814	NONMMUT002970	NONMMUT002970	NA	3.24596	3.57284	3.25355	3.60439	3.57988	3.55795	3.50626	3.51941	3.75451	3.77688	3.44128	3.42595	3.21429	3.38869	3.3596	3.07125	3.54654	3.82696	3.27068	3.14996	3.2126	3.42459	3.58286
TC0100001298.mm.1	1.88233	2.13225	1.94437	1.90128	1.98861	NONMMUT002973	NONMMUT002973	NA	1.73147	1.75103	1.88517	2.17053	1.87346	2.20308	1.86287	2.16072	2.30234	1.8371	2.10853	1.90699	1.92487	1.81508	1.83203	1.88838	1.93492	2.03601	1.99319	2.07658	1.95581	1.92724	1.99021
TC0100001299.mm.1	3.01218	2.88153	2.96329	2.79818	2.82831	NONMMUT002976	NONMMUT002976	NA	2.73473	3.14561	3.1576	3.23826	2.78471	3.03451	2.93637	2.47471	3.08053	3.08426	2.71017	2.86523	3.1935	2.75728	2.88045	2.57585	2.70046	3.07684	2.92113	2.5847	2.73378	2.68815	3.21381
TC0100001300.mm.1	2.98149	3.01833	3.06968	3.00897	3.02934	4933436E23Rik	NR_040455	RIKEN cDNA 4933436E23 gene	3.04963	2.89712	2.9813	3.00236	2.97702	3.0305	2.98707	3.08597	2.96977	2.91795	3.10883	3.04404	3.20792	2.91875	2.95876	3.07154	3.03017	3.06565	2.88315	3.07236	3.09941	3.02837	3.06342
TC0100001301.mm.1	4.73766	4.68839	4.74218	4.79427	4.80648	KnowTID_00000303	KnowTID_00000303	NA	4.71337	4.86746	4.76268	4.6433	4.70148	4.75298	4.65377	4.60662	4.74017	4.57925	4.82527	4.67488	4.88933	4.90209	4.74572	4.83036	4.71552	4.77766	4.68395	4.88702	4.86292	4.7225	4.876
TC0100001302.mm.1	7.29191	7.38094	7.41956	7.2645	7.28348	Zbtb41	NM_172643	zinc finger and BTB domain containing 41 homolog	7.36991	7.09177	7.16269	7.44505	7.39013	7.22666	7.33132	7.40964	7.55613	7.4805	7.4339	7.48163	7.28221	7.31514	7.33231	7.25841	7.29639	7.12023	7.41914	7.1407	7.22507	7.30348	7.32901
TC0100001303.mm.1	2.66486	2.51589	2.4067	2.41732	2.53175	Aspm	NM_009791	asp (abnormal spindle)-like, microcephaly associated (Drosophila)	2.37365	2.901	2.82229	2.49005	2.73731	2.47332	2.5965	2.5632	2.43054	2.37441	2.43015	2.33398	2.48825	2.25323	2.39265	2.26192	2.45168	2.7271	2.56538	2.58207	2.45974	2.51636	2.53519
TC0100001304.mm.1	1.63778	1.63354	1.68143	1.63408	1.65194	F13b	NM_031164	coagulation factor XIII, beta subunit	1.67694	1.63144	1.60751	1.67532	1.5977	1.66593	1.61366	1.65165	1.60291	1.6439	1.60938	1.72804	1.7444	1.67212	1.64965	1.63922	1.61259	1.59682	1.58693	1.76561	1.64518	1.69053	1.57149
TC0100001305.mm.1	1.15075	1.18641	1.12023	1.07945	1.15914	Gm26271	ENSMUST00000158349	predicted gene, 26271	1.04363	1.08947	1.11005	1.11915	1.39146	0.955501	1.31888	1.1295	1.34174	1.0626	1.10153	1.1723	1.14451	1.08831	1.02037	1.07597	1.10207	1.11052	1.15693	1.15041	1.17322	1.17935	1.13581
TC0100001306.mm.1	1.16904	1.10852	1.12181	1.07839	1.12191	Gm25619	ENSMUST00000122621	predicted gene, 25619	1.09115	1.25611	1.10192	0.966012	1.43	0.964961	1.07394	1.09737	1.29782	1.13259	1.11308	1.17553	1.06602	1.04194	0.977437	1.16351	1.1724	1.03665	1.14021	1.03833	1.10757	1.28009	1.04333
TC0100001307.mm.1	6.40947	6.32862	6.3093	6.24303	6.50403	Gm26048	ENSMUST00000157305	predicted gene, 26048	6.40172	5.96964	6.63444	6.5508	6.49075	6.3131	6.34025	6.36305	6.29807	6.33188	6.24343	6.40659	6.2553	6.17455	6.16608	6.08153	6.44974	6.34323	6.37945	6.3404	6.8072	6.46644	6.52665
TC0100001308.mm.1	6.50533	6.3853	6.54194	6.36758	6.39725	Kcnt2	NM_001081027	potassium channel, subfamily T, member 2	6.41917	6.2322	6.63177	6.56601	6.6775	6.34428	6.22043	6.42111	6.55539	6.60316	6.57833	6.66621	6.32006	6.63821	6.48497	6.20872	6.29722	6.20879	6.48841	6.12462	6.83401	6.23101	6.3082
TC0100001309.mm.1	4.48604	4.53041	4.79571	4.484	4.18303	NONMMUT003004	NONMMUT003004	NA	4.76891	4.59614	3.72677	4.50756	4.83079	4.90147	4.62969	4.1309	4.45957	4.90245	4.91797	4.91306	4.44937	4.75511	4.59428	4.46391	4.52105	4.08566	4.44706	4.25271	3.79539	3.87154	4.54846
TC0100001311.mm.1	6.01319	5.86097	5.8268	5.87709	6.16288	Gm25457	ENSMUST00000179509	predicted gene, 25457	5.83574	5.95818	6.28318	5.98518	6.00369	5.83639	5.97318	5.96414	5.67017	5.73844	5.99584	5.79379	5.77913	5.84585	5.57414	5.86252	6.01258	6.09034	5.90045	6.19393	6.41492	6.15912	6.14597
TC0100001312.mm.1	1.45596	1.53522	1.48107	1.50625	1.47301	Gm22016	ENSMUST00000158793	predicted gene, 22016	1.56361	1.45464	1.53448	1.47009	1.25699	1.40321	1.79633	1.56615	1.37519	1.40349	1.45975	1.55197	1.50908	1.51241	1.39306	1.72628	1.40459	1.4949	1.72799	1.1716	1.6031	1.4899	1.37248
TC0100001313.mm.1	5.86941	5.55418	5.71687	5.57897	5.67109	B3galt2	NM_020025	UDP-Gal:betaGlcNAc beta 1,3-galactosyltransferase, polypeptide 2	5.18728	5.33927	5.71074	6.57359	6.53619	5.39115	5.97146	5.45688	5.39723	5.79424	5.46167	5.99375	5.6178	6.33501	5.18417	5.54184	5.65343	5.1804	5.67507	4.73359	5.58095	5.5537	6.81212
TC0100001314.mm.1	1.76011	1.70551	1.61365	1.70307	1.65342	NONMMUT003025	NONMMUT003025	NA	1.72655	1.7953	1.60872	1.55791	2.11206	1.92503	1.61222	1.62586	1.65893	1.58142	1.7783	1.47196	1.62291	1.7061	1.62487	1.77355	1.93891	1.47192	2.00444	1.68357	1.66436	1.38257	1.53216
TC0100001315.mm.1	9.17928	9.13564	9.17396	8.91723	9.04849	Gm6397	ENSMUST00000161973	predicted gene 6397	9.00774	9.16266	9.33563	9.30981	9.08058	8.98268	9.1644	9.07666	9.31882	9.04354	9.17095	9.0805	9.40086	8.9641	8.85844	8.8122	8.88351	9.06789	9.08831	8.7775	9.2431	8.99683	9.1367
TC0100001316.mm.1	5.45909	5.49062	5.49053	5.5075	5.44003	Glrx2	NM_001038592	glutaredoxin 2 (thioltransferase)	5.52048	5.42134	5.42445	5.49671	5.43247	5.40878	5.51531	5.4866	5.5518	5.54608	5.44108	5.48126	5.49372	5.47799	5.48078	5.56189	5.49819	5.51866	5.43692	5.39454	5.47812	5.41195	5.47862
TC0100001317.mm.1	6.88698	6.63748	6.69578	6.74553	6.67871	Uchl5	NM_001159866	ubiquitin carboxyl-terminal esterase L5	6.65253	6.68905	7.20446	7.2113	6.67758	6.67564	6.53714	6.43368	6.90348	6.69769	6.59892	6.65358	6.83293	6.74714	6.68592	6.67192	6.78774	6.83494	6.67426	6.31899	6.99396	6.67478	6.73155
TC0100001318.mm.1	2.04696	2.24966	2.08735	2.22915	1.92928	Gm25663	ENSMUST00000157698	predicted gene, 25663	2.02277	2.01982	1.99898	2.28472	1.9085	1.89149	2.19893	2.36137	2.54684	2.38044	2.12268	2.11214	1.73415	2.3129	2.09166	2.28751	2.24157	2.2121	2.0298	1.60586	2.09302	1.77052	2.14719
TC0100001319.mm.1	3.5372	3.00272	3.5158	3.43243	3.16226	XR_140466	XR_140466	Jackson Lab	3.0176	3.31841	3.56889	3.47937	4.30174	2.89675	2.98842	2.95011	3.17559	4.02112	3.26428	3.79171	2.98609	3.28871	4.09217	3.62181	3.52048	2.63901	3.08977	3.25488	2.80238	3.36424	3.30001
TC0100001320.mm.1	1.56985	1.64707	1.64308	1.66857	1.5915	NONMMUT003038	NONMMUT003038	NA	1.53025	1.57912	1.6805	1.39611	1.66326	1.66285	1.80611	1.46574	1.65357	1.56691	1.63183	1.66095	1.71263	1.80661	1.81482	1.5685	1.5241	1.62879	1.45395	1.68326	1.71189	1.59476	1.51362
TC0100001321.mm.1	6.57755	6.48441	6.36303	6.34935	6.39205	AB350311	uc029qts.1	NA	6.00576	6.72082	6.63633	6.61415	6.91068	6.25234	6.83211	6.13528	6.71792	6.28626	6.55951	6.44759	6.15875	6.50548	6.41377	6.3744	6.31288	6.14019	6.29042	6.41866	6.45451	6.31526	6.48138
TC0100001322.mm.1	1.23958	1.15805	1.20377	1.17436	1.19834	NONMMUT003042	NONMMUT003042	NA	1.00664	1.1552	1.21549	1.24431	1.57625	1.16316	1.11517	1.17776	1.1761	1.23219	1.20355	1.25878	1.12056	1.19047	1.04732	1.14394	1.38065	1.10942	1.24109	1.28196	1.09394	1.29058	1.08415
TC0100001323.mm.1	3.49368	3.33119	3.34016	3.51364	3.39731	KnowTID_00000304	KnowTID_00000304	NA	3.33904	3.60277	3.40305	3.61907	3.50446	3.38697	3.50761	3.21542	3.21474	3.28334	3.61545	3.25299	3.20888	3.79833	3.6034	3.51488	3.30947	3.34212	3.51575	3.21924	3.42093	3.45112	3.37948
TC0100001324.mm.1	3.79586	3.78399	3.87379	3.88249	3.89874	Gm5262	ENSMUST00000180655	predicted gene 5262	3.9737	3.78289	3.89772	3.70186	3.62312	3.90161	3.76967	3.78565	3.67901	3.82852	3.89594	3.81899	3.95171	3.83632	3.83757	4.04329	3.92777	3.7675	4.01416	3.86845	3.81328	3.91809	3.87971
TC0100001325.mm.1	7.42444	7.31759	7.2936	7.17535	7.29487	AB350709	uc029qtt.1	NA	7.03854	7.41644	7.46801	7.37992	7.81929	7.12336	7.56932	7.02248	7.55519	7.28685	7.48504	7.35	7.05249	7.26868	7.22241	7.29506	6.9733	7.1173	7.04277	7.35067	7.2487	7.24754	7.58467
TC0100001326.mm.1	7.42444	7.31759	7.2936	7.17535	7.29487	AB350709	uc029qtu.1	NA	7.03854	7.41644	7.46801	7.37992	7.81929	7.12336	7.56932	7.02248	7.55519	7.28685	7.48504	7.35	7.05249	7.26868	7.22241	7.29506	6.9733	7.1173	7.04277	7.35067	7.2487	7.24754	7.58467
TC0100001327.mm.1	7.42444	7.31759	7.2936	7.17535	7.29487	AB350709	uc029qtv.1	NA	7.03854	7.41644	7.46801	7.37992	7.81929	7.12336	7.56932	7.02248	7.55519	7.28685	7.48504	7.35	7.05249	7.26868	7.22241	7.29506	6.9733	7.1173	7.04277	7.35067	7.2487	7.24754	7.58467
TC0100001328.mm.1	1.22774	1.24233	1.24732	1.24621	1.25306	NONMMUT003052	NONMMUT003052	NA	1.30934	1.12291	1.33386	1.22468	1.1479	1.24803	1.25521	1.25643	1.20963	1.09607	1.26789	1.18639	1.43895	1.2557	1.36582	1.25742	1.29111	1.061	1.24462	1.2119	1.30427	1.26195	1.24257
TC0100001329.mm.1	3.05788	2.90111	2.914	2.80378	2.94882	Gm5263	ENSMUST00000163646	predicted gene 5263	3.24749	2.80289	3.21711	2.87449	3.1474	3.13671	2.98844	2.65142	2.82788	2.63845	2.90159	3.06679	3.04918	2.7985	2.85893	2.89234	2.59989	2.86924	3.10114	2.81001	2.92079	3.15035	2.76182
TC0100001330.mm.1	1.66891	1.70872	1.78118	1.71537	1.74642	Brinp3	NM_001145807	bone morphogenetic protein/retinoic acid inducible neural specific 3	1.67203	1.6922	1.66274	1.65409	1.6635	1.73881	1.67273	1.81354	1.60982	1.7403	1.73617	1.80849	1.83978	1.6834	1.72819	1.69964	1.74101	1.72463	1.72532	1.75397	1.77739	1.75131	1.72411
TC0100001331.mm.1	1.52047	1.50216	1.55907	1.57106	1.49939	NONMMUT003064	NONMMUT003064	NA	1.5236	1.46698	1.45452	1.46962	1.68761	1.52505	1.47122	1.44169	1.57067	1.38678	1.53784	1.58766	1.724	1.56047	1.39308	1.44879	1.78655	1.66639	1.4842	1.43656	1.52065	1.53966	1.51588
TC0100001332.mm.1	5.44414	5.45141	5.43231	5.30864	5.45289	Gm15583	XM_001480180	predicted gene 15583	5.19351	5.42558	5.65871	5.30441	5.6385	5.10763	5.61291	5.24254	5.84255	5.43602	5.34571	5.45833	5.48919	5.17936	5.23458	5.22624	5.32985	5.57319	5.41716	5.34408	5.43317	5.48249	5.58755
TC0100001333.mm.1	1.22584	1.22199	1.29536	1.18422	1.15902	NONMMUT003066	NONMMUT003066	NA	1.24209	1.20586	1.08225	1.31839	1.28059	1.14578	1.35586	1.17321	1.21312	1.25931	1.25904	1.38497	1.27813	1.14056	1.19805	1.12761	1.3494	1.10549	1.11931	1.21703	1.22016	1.0326	1.20602
TC0100001334.mm.1	1.41104	1.29632	1.36738	1.3645	1.30445	KnowTID_00000305	KnowTID_00000305	NA	1.32297	1.34314	1.48966	1.40568	1.49377	1.18251	1.24029	1.30251	1.45995	1.44688	1.4754	1.24417	1.30307	1.20565	1.50414	1.25357	1.34087	1.51829	1.34303	1.39239	1.28612	1.34197	1.15874
TC0100001335.mm.1	1.12354	1.11304	1.12447	1.1845	1.15807	KnowTID_00000306	KnowTID_00000306	NA	1.06601	1.0952	1.11761	1.28729	1.05159	1.3121	0.964703	1.07423	1.10112	1.28031	1.12728	1.11429	0.975994	1.28972	1.1417	1.17374	1.1372	1.18016	1.10432	1.35105	1.2125	1.07443	1.04807
TC0100001336.mm.1	1.67564	1.81822	1.75407	1.64767	1.76078	n-R5s219	ENSMUST00000104328	nuclear encoded rRNA 5S 219	1.77684	1.72376	1.70801	1.64326	1.52634	1.72711	1.88271	1.90524	1.75783	1.69633	1.79641	1.69868	1.82485	1.42898	1.71224	1.69702	1.71526	1.68486	1.64718	1.54703	1.99323	1.88103	1.73545
TC0100001337.mm.1	4.94225	4.75832	5.11053	5.14332	4.98915	NONMMUT003082	NONMMUT003082	NA	4.97134	5.16264	4.9281	4.90401	4.74518	5.0597	4.83924	4.98666	4.14769	4.88064	5.42919	5.13374	4.99855	5.11908	5.10577	5.08579	5.31563	5.09033	5.01801	5.05847	5.03159	4.82209	5.01559
TC0100001338.mm.1	7.75981	8.06484	7.91769	7.66441	7.65954	Ptgs2	NM_011198	prostaglandin-endoperoxide synthase 2	7.13369	8.14645	8.41801	7.60395	7.49693	7.48269	8.11722	8.16192	8.49752	7.24721	7.88418	7.91353	8.62585	6.90075	8.22327	7.84296	7.76341	7.59165	7.61515	7.89707	7.46203	7.67165	7.65179
TC0100001339.mm.1	1.53402	1.47978	1.63741	1.57098	1.52027	Pdc	NM_001159730	phosducin	1.49243	1.64073	1.3953	1.53031	1.61136	1.48238	1.5011	1.52484	1.4108	1.6383	1.53512	1.63066	1.74558	1.62522	1.58101	1.57929	1.41595	1.65345	1.55392	1.64887	1.49286	1.39457	1.51113
TC0100001340.mm.1	1.30775	1.23198	1.28181	1.2313	1.30049	NONMMUT003088	NONMMUT003088	NA	1.38435	1.30839	1.23048	1.29059	1.32495	1.11517	1.19809	1.26767	1.34699	1.23305	1.23069	1.23647	1.42703	1.19355	1.24675	1.2298	1.30367	1.18272	1.29574	1.31514	1.28386	1.29672	1.31099
TC0100001341.mm.1	7.75071	7.67899	7.69518	7.64071	7.63123	Tpr	NM_133780	translocated promoter region, nuclear basket protein	7.6485	7.71412	7.75553	7.79884	7.83659	7.66304	7.65642	7.66924	7.72725	7.69726	7.73586	7.69151	7.65611	7.69045	7.63991	7.62708	7.64431	7.60181	7.65076	7.53963	7.66855	7.63736	7.65986
TC0100001342.mm.1	8.51637	8.23568	7.96697	7.67175	7.64713	NONMMUT003096	NONMMUT003096	NA	7.88226	8.82429	8.27105	8.6552	8.94904	8.26627	8.17107	8.38734	8.11805	7.7713	7.51728	8.42061	8.15868	8.29736	7.80623	6.3593	7.52482	8.37103	7.83897	8.03303	7.45589	7.50179	7.40598
TC0100001343.mm.1	1.26657	1.24743	1.36539	1.3164	1.272	NONMMUT003099	NONMMUT003099	NA	1.23836	1.3212	1.2608	1.27717	1.23531	1.20601	1.26132	1.31035	1.21204	1.3448	1.43677	1.28923	1.39076	1.419	1.21588	1.35094	1.28949	1.30671	1.33579	1.28428	1.28953	1.21701	1.23337
TC0100001344.mm.1	2.4482	2.34972	2.43252	2.42468	2.56983	NONMMUT003101	NONMMUT003101	NA	2.36532	2.46647	2.54168	2.3652	2.50236	2.35834	2.27764	2.3277	2.43521	2.39648	2.51672	2.30818	2.50869	2.44748	2.42846	2.46407	2.41717	2.36623	2.40262	2.57609	2.52489	2.91725	2.42831
TC0100001345.mm.1	2.59587	2.57457	2.61506	2.65899	2.70671	Gm20631	ENSMUST00000177239	predicted gene 20631	2.528	2.68176	2.65012	2.39136	2.72809	2.55115	2.59874	2.57787	2.57053	2.49879	2.69534	2.54272	2.72337	2.7155	2.65869	2.61435	2.6822	2.62423	2.61915	2.8517	2.67709	2.63515	2.75047
TC0100001346.mm.1	2.58446	2.64295	2.63065	2.62878	2.57031	NONMMUT003105	NONMMUT003105	NA	2.56882	2.57884	2.77439	2.43823	2.56201	2.66082	2.49417	2.75701	2.65979	2.28425	2.72165	2.80402	2.71267	2.67525	2.60392	2.42675	2.6587	2.77927	2.51877	2.8152	2.40415	2.87113	2.2423
TC0100001347.mm.1	3.59924	3.54726	3.56504	3.68208	3.67402	Gm8941	ENSMUST00000181451	predicted gene 8941	3.69358	3.64539	3.7244	3.43446	3.49834	3.76945	3.52669	3.57163	3.32129	3.59437	3.62402	3.51935	3.52243	3.5771	3.70653	3.8497	3.69921	3.57785	3.7962	3.60048	3.66804	3.65521	3.65018
TC0100001348.mm.1	1.53433	1.61431	1.57391	1.57662	1.59467	C730036E19Rik	NR_038011	RIKEN cDNA C730036E19 gene	1.52093	1.52771	1.53838	1.52885	1.55577	1.65594	1.5511	1.66868	1.58151	1.50565	1.60489	1.5776	1.60751	1.51664	1.67516	1.56669	1.57908	1.54551	1.56651	1.65247	1.62469	1.57373	1.55597
TC0100001349.mm.1	4.14745	4.00181	4.11335	4.16708	4.13497	3110040M04Rik	XM_993996	RIKEN cDNA 3110040M04 gene	4.24058	4.14142	4.04541	4.12229	4.18756	4.05336	3.93968	4.03805	3.97616	3.90851	4.02887	4.1769	4.33914	4.12113	4.18881	4.20935	4.01486	4.30125	4.03722	4.23682	4.1403	4.17345	4.08704
TC0100001350.mm.1	4.13706	4.11575	4.0813	4.12322	4.09891	NONMMUT003117	NONMMUT003117	NA	4.23835	4.12498	4.14729	4.09154	4.08315	4.26613	4.05307	4.10612	4.03766	3.82604	4.03939	4.1655	4.29427	4.00039	4.19379	4.21586	3.99933	4.2067	3.98648	4.14806	4.1249	4.23737	3.99775
TC0100001351.mm.1	7.63857	7.18227	7.06852	7.38586	7.23601	Ivns1abp	NM_001039511	influenza virus NS1A binding protein	6.84456	7.33485	7.78895	8.24096	7.98352	7.19178	7.26437	6.96494	7.30801	7.33487	6.87842	7.01041	7.05037	7.49567	7.11747	7.29439	7.62616	7.3956	7.16547	6.82547	7.107	7.44153	7.6406
TC0100001352.mm.1	4.22248	4.09251	4.24653	4.13321	4.08595	NONMMUT003127	NONMMUT003127	NA	3.86635	4.26914	4.40217	4.32103	4.25372	4.10241	4.00701	4.21433	4.04628	4.32566	4.23627	4.39021	4.03399	4.19586	4.1664	4.04395	4.06552	4.19432	4.06981	4.22535	3.93422	4.26356	3.93678
TC0100001353.mm.1	5.91043	6.12945	6.07432	5.89771	6.08842	Trmt1l	NM_026876	tRNA methyltransferase 1 like	5.89648	5.90071	5.76898	6.01314	5.97283	5.99196	6.2051	6.02524	6.29552	6.14308	6.02219	6.1574	5.97462	5.736	5.9554	5.84633	5.74053	6.21029	6.00289	6.05946	6.07206	6.16244	6.14524
TC0100001354.mm.1	3.89681	3.89061	3.79113	3.78951	3.73315	Mir7682	NR_106150	microRNA mir-7682	3.59225	4.13038	3.90378	3.85349	4.00416	3.77107	3.66403	4.00578	4.12156	3.7571	4.07185	3.89974	3.43584	3.77125	3.78206	3.9305	3.80075	3.66297	3.68956	3.77792	3.69778	3.58554	3.91497
TC0100001355.mm.1	4.49604	4.42638	4.21885	4.43623	4.37089	NONMMUT003134	NONMMUT003134	NA	4.02681	4.65646	4.72032	4.6109	4.46569	3.84612	4.59447	4.50281	4.76213	3.93613	4.15977	4.50918	4.27033	4.4552	4.57242	4.38691	4.3741	4.39253	4.26933	4.35307	4.14415	4.42622	4.6617
TC0100001356.mm.1	8.75794	8.91884	9.06587	8.90072	8.73548	Fam129a	NM_022018	family with sequence similarity 129, member A	9.11067	8.78738	8.26174	8.87859	8.7513	8.89153	8.8709	9.01222	8.90071	9.14667	9.06708	8.9943	9.05544	8.97302	8.87852	8.88287	8.88713	8.88208	8.94327	8.81426	8.40867	8.79136	8.71981
TC0100001357.mm.1	2.53759	3.10335	2.81333	2.88564	2.94964	NONMMUT003138	NONMMUT003138	NA	2.60813	2.66886	2.48798	2.49905	2.42389	2.66116	3.40628	3.33783	3.00815	2.8695	2.84219	2.71866	2.82296	2.97171	3.01114	2.8611	2.79616	2.78808	2.85486	3.06916	2.69707	3.02099	3.10609
TC0100001358.mm.1	7.71126	7.89555	7.86197	7.71738	7.71964	Edem3	NM_001039644	ER degradation enhancer, mannosidase alpha-like 3	7.69675	7.68278	7.61046	7.77518	7.79111	7.83945	7.83964	7.89036	8.01275	7.92139	7.84101	7.85583	7.82965	7.75625	7.74333	7.64536	7.65102	7.79092	7.82596	7.7019	7.53049	7.78318	7.75666
TC0100001359.mm.1	3.29132	3.67713	3.39065	3.35948	3.24701	NONMMUT003143	NONMMUT003143	NA	2.8884	3.91145	2.94864	3.32577	3.38236	3.33633	3.69319	4.08691	3.59211	3.30579	3.55072	3.47049	3.2356	3.33334	3.47043	3.45019	3.17951	3.36392	3.13839	3.67708	3.01248	3.08021	3.32691
TC0100001360.mm.1	3.13039	3.01215	3.03803	2.85662	2.93058	NONMMUT003144	NONMMUT003144	NA	2.72823	2.8508	3.42296	3.13227	3.51769	2.61843	3.0859	3.1015	3.24275	2.96893	2.96629	3.04046	3.17645	2.85934	2.91639	3.00321	2.63056	2.8736	3.05261	2.8535	2.68983	2.8812	3.17578
TC0100001361.mm.1	2.37965	2.35673	2.35845	2.43531	2.40215	NONMMUT003152	NONMMUT003152	NA	2.37258	2.38651	2.44631	2.3499	2.34294	2.60028	2.36079	2.30848	2.15738	2.29818	2.35251	2.47844	2.30467	2.29567	2.56339	2.48124	2.50774	2.32851	2.33342	2.61388	2.44675	2.37509	2.24161
TC0100001362.mm.1	2.51484	2.66241	2.6317	2.61133	2.51897	NONMMUT003154	NONMMUT003154	NA	2.39202	2.67571	2.639	2.46661	2.40084	2.70497	2.59832	2.54317	2.80318	2.49501	2.89571	2.56697	2.5691	2.53848	2.56309	2.49774	2.71456	2.74281	2.52615	2.50725	2.39423	2.68724	2.47999
TC0100001363.mm.1	2.04547	1.96424	1.99429	1.98275	2.04388	NONMMUT003155	NONMMUT003155	NA	2.10291	2.05118	2.09694	1.95714	2.0192	2.02675	1.98493	1.94103	1.90425	2.0296	1.90887	2.03164	2.00705	1.98155	1.90216	1.95645	2.05489	2.01871	2.14632	1.96359	2.04906	2.04195	2.01846
TC0100001364.mm.1	1.48225	1.50252	1.49566	1.52629	1.57104	NONMMUT003156	NONMMUT003156	NA	1.53444	1.43967	1.45494	1.59867	1.38352	1.46924	1.54576	1.60531	1.38979	1.5582	1.39274	1.44214	1.58956	1.46146	1.50235	1.46908	1.61365	1.5849	1.59235	1.70666	1.51165	1.57664	1.46789
TC0100001365.mm.1	3.2194	3.23407	3.29073	3.30881	3.35336	Colgalt2	NM_177756	collagen beta(1-O)galactosyltransferase 2	3.28883	3.19557	3.25699	3.09799	3.25763	3.25777	3.28452	3.26408	3.12991	3.17259	3.28904	3.28295	3.41835	3.31786	3.3107	3.43142	3.24949	3.23459	3.24901	3.38759	3.38069	3.32729	3.42222
TC0100001366.mm.1	1.95497	1.71738	1.91133	1.90546	1.73751	NONMMUT003164	NONMMUT003164	NA	2.12983	2.15243	2.10541	1.92804	1.45916	1.7871	1.79152	1.71353	1.57738	1.95168	1.82141	1.8117	2.06053	2.18746	1.66542	1.80338	1.83674	2.03431	1.76485	1.90748	1.49241	1.66606	1.85677
TC0100001367.mm.1	1.15754	1.19675	1.22125	1.19697	1.13465	Apobec4	NM_001081197	apolipoprotein B mRNA editing enzyme, catalytic polypeptide-like 4 (putative)	1.06971	1.19133	1.16084	1.19444	1.17138	1.22647	1.15246	1.21425	1.19381	1.23883	1.17411	1.28493	1.18714	1.23366	1.2564	1.13479	1.26121	1.09879	1.05656	1.23112	1.15682	1.05466	1.17411
TC0100001368.mm.1	1.03813	1.11094	1.07023	1.08502	1.11256	NONMMUT003166	NONMMUT003166	NA	1.08089	0.948079	0.958579	1.0649	1.13819	1.12841	1.00315	1.16524	1.14694	1.00247	1.10502	1.18161	0.991813	1.09713	0.993322	1.04455	1.17468	1.11541	1.06152	1.12762	1.14133	1.12914	1.10322
TC0100001369.mm.1	8.13613	7.88823	7.89554	7.78766	7.90266	Arpc5	NM_026369	actin related protein 2/3 complex, subunit 5	7.7429	8.43025	8.553	7.90171	8.05276	7.85654	7.8648	7.85688	7.9747	7.86363	7.90155	7.80594	8.01104	7.78132	7.71286	7.50207	7.94935	7.9927	7.82625	7.7439	8.15208	7.90517	7.88588
TC0100001370.mm.1	6.57264	6.22542	6.03285	5.96778	6.30848	Ncf2	NM_010877	neutrophil cytosolic factor 2	5.83604	7.16351	7.3805	6.05223	6.43093	6.38774	6.11949	6.11756	6.27688	5.86857	6.07078	5.84397	6.34809	5.80712	5.84587	5.09326	6.34894	6.74371	6.06713	6.38168	6.53909	6.46444	6.09004
TC0100001371.mm.1	2.3834	2.37226	2.47285	2.50221	2.49722	KnowTID_00000308	KnowTID_00000308	NA	2.33177	2.44493	2.39523	2.24149	2.50356	2.35329	2.28791	2.48851	2.35932	2.37138	2.45588	2.38437	2.67976	2.37574	2.61388	2.47651	2.4834	2.56154	2.386	2.65186	2.47134	2.39027	2.58662
TC0100001372.mm.1	1.48718	1.53795	1.64301	1.57241	1.51706	KnowTID_00000309	KnowTID_00000309	NA	1.54549	1.54806	1.51997	1.47228	1.35009	1.44083	1.49274	1.81646	1.40176	1.54995	1.7079	1.65852	1.65568	1.65193	1.56434	1.5793	1.59253	1.47395	1.37921	1.57827	1.52291	1.66457	1.44032
TC0100001373.mm.1	5.14454	5.19555	4.93383	5.41082	5.23363	Nmnat2	NM_175460	nicotinamide nucleotide adenylyltransferase 2	5.08792	5.06652	5.46847	4.86499	5.23481	5.18509	5.24482	5.12195	5.23034	5.04022	4.88194	4.7847	5.02847	4.92831	4.9718	7.02826	4.93	5.19574	4.88977	4.84065	5.9023	5.51221	5.02323
TC0100001374.mm.1	8.61908	8.49176	8.51142	8.70437	8.60446	NONMMUT003173	NONMMUT003173	NA	8.58052	8.6303	8.61459	8.63483	8.63516	8.47637	8.54846	8.51595	8.42627	8.41476	8.63348	8.46061	8.53685	8.76494	8.64506	8.84079	8.67776	8.59329	8.54521	8.5782	8.67653	8.59216	8.63019
TC0100001375.mm.1	5.82978	5.90742	5.79854	5.7545	5.91317	Gm8818	ENSMUST00000110797	predicted pseudogene 8818	5.78624	5.64234	5.87981	5.94069	5.8998	5.85027	5.87524	5.9035	6.00069	5.93623	5.74127	5.84423	5.67241	5.72126	5.7917	5.57009	5.86368	5.82576	5.95722	5.68652	6.03932	5.94669	5.93609
TC0100001377.mm.1	2.06216	2.05917	2.10637	2.0836	2.05363	Shcbp1l	NM_001033162	Shc SH2-domain binding protein 1-like	2.14068	2.04328	2.10891	1.99049	2.02746	2.12952	2.02135	2.15261	1.93319	2.11252	2.00215	2.08866	2.22216	2.13352	1.98818	2.03155	2.1737	2.09103	2.04951	2.1569	2.03389	2.04814	1.97974
TC0100001378.mm.1	1.59386	1.493	1.55077	1.53007	1.5477	Gm25588	ENSMUST00000082501	predicted gene, 25588	1.68131	1.61553	1.55943	1.67634	1.43668	1.52778	1.51827	1.43474	1.49123	1.45699	1.52224	1.58987	1.63397	1.34419	1.54416	1.34165	1.81567	1.60466	1.44422	1.46882	1.69466	1.4972	1.6336
TC0100001379.mm.1	3.87893	3.81797	3.87766	3.92065	3.94103	Rgs8	NM_026380	regulator of G-protein signaling 8	3.88074	3.84905	3.99226	3.86709	3.80549	3.8627	3.81295	3.89112	3.7051	3.72552	3.94325	3.78915	4.05272	3.99646	3.78631	4.0182	3.89826	3.90399	3.79442	4.05452	4.02829	3.95687	3.87107
TC0100001380.mm.1	1.73471	1.62768	1.82328	1.74615	1.86513	KnowTID_00000310	KnowTID_00000310	NA	1.6869	1.76476	1.76252	1.75435	1.705	1.60481	1.68182	1.6953	1.52878	1.74716	1.82344	1.86648	1.85602	1.64046	1.79965	1.91608	1.75507	1.61948	1.59487	2.09197	1.77548	1.82347	2.03985
TC0100001381.mm.1	4.39276	3.91088	3.93555	3.933	4.11619	Rgs16	NM_011267	regulator of G-protein signaling 16	3.58888	4.73006	5.16375	3.98809	4.49302	3.91265	3.97843	3.80033	3.95211	3.66337	3.90872	3.84285	4.32726	3.76403	3.90202	3.81313	3.79781	4.388	3.93648	4.301	4.10315	4.24924	3.99111
TC0100001382.mm.1	5.14377	4.80949	4.77148	4.88564	5.01268	Rnasel	NM_011882	ribonuclease L (2, 5-oligoisoadenylate synthetase-dependent)	4.78404	5.24545	5.70507	4.88869	5.09561	4.80281	4.86258	4.60717	4.9654	4.70901	4.81586	4.76601	4.79505	4.83414	4.84578	4.61612	4.99244	5.1397	4.91444	4.71541	5.43781	4.89086	5.1049
TC0100001383.mm.1	1.74302	1.78893	1.67546	1.81783	1.82447	NONMMUT003189	NONMMUT003189	NA	1.64264	1.71312	1.78655	1.76425	1.80856	1.70857	1.74572	1.67991	2.02153	1.51124	1.67408	1.81733	1.69918	1.6203	1.96804	1.83994	1.76461	1.89626	1.93838	1.63756	2.0778	1.87033	1.59831
TC0100001384.mm.1	1.50108	1.55876	1.59956	1.52935	1.58192	NONMMUT003191	NONMMUT003191	NA	1.4257	1.50335	1.37311	1.5145	1.68873	1.60085	1.47758	1.41547	1.74113	1.56314	1.50494	1.69209	1.63808	1.74716	1.33748	1.36941	1.74579	1.44691	1.59961	1.653	1.56089	1.55003	1.54608
TC0100001385.mm.1	1.71683	1.77081	1.75219	1.79975	1.69792	Gm5531	NM_001008426	predicted gene 5531	1.64608	1.72264	1.6682	1.69225	1.85501	1.76166	1.78782	1.85415	1.67958	1.82035	1.6645	1.72259	1.80131	1.79145	1.88874	1.70229	1.89	1.72627	1.67328	1.68851	1.78759	1.54793	1.79231
TC0100001386.mm.1	2.75423	2.80287	2.8377	2.75936	2.74248	Teddm1	NM_178244	transmembrane epididymal protein 1	2.87165	2.73308	2.65115	2.76308	2.75217	2.98645	2.79066	2.76633	2.66804	2.84818	2.72291	2.88419	2.8955	2.62508	2.74699	2.8548	2.83557	2.73437	2.63167	2.82258	2.80583	2.67762	2.77472
TC0100001387.mm.1	9.47708	9.0165	9.15624	9.58228	9.29359	Glul	NM_008131	glutamate-ammonia ligase (glutamine synthetase)	9.3099	9.30336	9.41148	9.65925	9.70143	9.25427	8.95894	8.88757	8.96521	9.35237	9.00411	9.28348	8.98501	9.51038	9.60064	9.67799	9.66411	9.45826	9.27417	9.21138	9.45816	9.18103	9.34322
TC0100001388.mm.1	8.50638	8.3834	8.41866	8.61995	8.51595	A930039A15Rik	ENSMUST00000105679	RIKEN cDNA A930039A15 gene	8.46491	8.46807	8.45124	8.59974	8.54792	8.32631	8.42336	8.40467	8.37926	8.48189	8.43526	8.50811	8.24936	8.66302	8.64859	8.72143	8.5904	8.47628	8.58076	8.52888	8.48809	8.47256	8.50945
TC0100001389.mm.1	2.82126	2.81938	2.77355	2.81061	2.85072	NONMMUT003198	NONMMUT003198	NA	2.89645	2.67974	2.85539	2.86879	2.80595	2.91752	2.84214	2.82396	2.69388	2.66156	2.79728	2.78976	2.84559	2.79518	2.86826	2.8851	2.76113	2.7434	2.86846	2.88462	2.96324	2.78786	2.74944
TC0100001390.mm.1	2.04925	1.94105	2.04828	2.00468	2.01742	NONMMUT003200	NONMMUT003200	NA	2.05812	1.94535	2.07282	1.99075	2.1792	1.94968	1.94513	1.97105	1.89834	1.93582	2.07591	1.97841	2.20297	2.05286	1.95109	2.02898	2.03052	1.95993	1.95414	2.05886	2.13401	2.02031	1.91976
TC0100001391.mm.1	2.33804	2.2547	2.28987	2.2652	2.35887	NONMMUT003207	NONMMUT003207	NA	2.31462	2.49199	2.44209	2.25007	2.19143	2.34654	2.25483	2.3538	2.06363	2.17674	2.25852	2.40301	2.3212	2.23366	2.21434	2.29145	2.42841	2.15815	2.40796	2.28989	2.58034	2.26875	2.24739
TC0100001392.mm.1	3.69203	3.59653	3.80884	3.63139	3.71565	Zfp648	NM_001204908	zinc finger protein 648	3.76805	3.68348	3.66959	3.70066	3.63838	3.609	3.75109	3.53411	3.49193	3.70418	3.8393	3.66502	4.02686	3.74903	3.595	3.59681	3.54803	3.66809	3.59967	3.98392	3.58908	3.75284	3.65273
TC0100001393.mm.1	2.96175	2.78021	2.82186	2.75197	2.83443	4930532M18Rik	NR_108050	RIKEN cDNA 4930532M18 gene	2.99102	2.91383	2.9613	2.95028	2.99234	2.70559	2.93516	2.91565	2.56443	2.766	2.74507	2.84327	2.93311	2.67785	2.69306	2.97105	2.70156	2.71632	2.84522	2.83922	2.91052	2.8785	2.69868
TC0100001394.mm.1	1.85673	1.9404	2.09012	2.05561	1.99164	NONMMUT003216	NONMMUT003216	NA	1.82601	1.96923	1.83363	1.99809	1.65668	1.97153	2.05502	1.73716	1.99791	2.12905	2.15275	1.98042	2.09824	2.11928	1.87203	2.02635	2.28476	1.97564	1.80374	2.20644	2.01067	2.01928	1.91809
TC0100001395.mm.1	2.73522	2.70518	2.74121	2.81844	2.72169	NONMMUT003217	NONMMUT003217	NA	2.87413	2.7743	2.82641	2.67709	2.5242	2.80065	2.7908	2.63748	2.59179	2.64126	2.72462	2.87882	2.72014	2.83525	2.82207	2.75482	2.8353	2.84478	2.56379	2.82233	2.85129	2.65974	2.71132
TC0100001396.mm.1	2.40504	2.39271	2.53967	2.53272	2.41238	NONMMUT003224	NONMMUT003224	NA	2.36419	2.33432	2.61854	2.28843	2.41971	2.29415	2.35594	2.52268	2.39807	2.33622	2.51946	2.55179	2.75119	2.41962	2.32856	2.66746	2.61401	2.63392	2.42566	2.63319	2.41499	2.31012	2.27793
TC0100001397.mm.1	6.13028	6.1602	6.07472	6.05627	6.12326	Stx6	NM_021433	syntaxin 6	6.08162	6.29118	6.18899	5.97191	6.11768	6.02782	6.28575	6.2054	6.12182	6.05244	5.99863	6.04712	6.20071	5.97311	6.06676	5.95518	6.09754	6.18874	6.11872	6.18376	6.05337	6.12482	6.13564
TC0100001398.mm.1	2.8158	2.66316	2.73162	2.7591	2.83309	NONMMUT003228	NONMMUT003228	NA	2.77775	2.82368	2.66738	2.87267	2.93753	2.4532	2.72144	2.96959	2.50843	2.9503	2.55154	2.59633	2.82831	2.64368	2.65584	2.6872	2.89884	2.90994	2.75053	2.64103	3.16731	2.86518	2.74139
TC0100001399.mm.1	4.3393	4.34642	4.37461	4.40372	4.45016	NONMMUT003230	NONMMUT003230	NA	4.35324	4.31271	4.47438	4.30123	4.25494	4.47558	4.41193	4.3681	4.13009	4.31456	4.45981	4.27555	4.44853	4.50669	4.32758	4.52388	4.4232	4.23725	4.48331	4.6228	4.45047	4.51403	4.1802
TC0100001400.mm.1	11.1393	11.0517	11.0303	11.1341	11.0531	Gm22569	ENSMUST00000175545	predicted gene, 22569	11.0294	11.1987	11.1399	11.1689	11.1594	11.0459	11.1006	11.0283	11.0319	10.9695	11.1204	11.0002	11.0311	11.2192	11.121	11.1411	11.1025	11.0866	10.9997	11.0648	11.1115	11.0028	11.0868
TC0100001401.mm.1	1.8891	1.84423	1.74257	1.89604	1.8281	NONMMUT003235	NONMMUT003235	NA	1.92431	1.77002	1.82454	1.90606	2.02059	1.91204	1.92608	1.81453	1.72426	1.81668	1.90183	1.62803	1.62374	1.94382	1.83692	1.99969	1.91649	1.78329	1.78236	1.94219	1.79396	1.86191	1.76005
TC0100001402.mm.1	5.35452	5.26819	5.19868	5.3717	5.24433	Acbd6	NM_001145781	acyl-Coenzyme A binding domain containing 6	5.33049	5.36287	5.2768	5.40399	5.39848	5.28561	5.23473	5.27376	5.27867	5.22841	5.20038	5.28117	5.08476	5.28186	5.49561	5.38358	5.35028	5.3472	5.34739	5.12164	5.31741	5.18895	5.24628
TC0100001403.mm.1	3.62257	3.52824	3.66788	3.46928	3.52731	NONMMUT003243	NONMMUT003243	NA	3.59774	3.55754	3.52992	3.63431	3.79334	3.41206	3.4074	3.74505	3.54844	4.00941	3.62665	3.60689	3.42859	3.28672	3.65458	3.69341	3.63636	3.0753	3.39224	3.35797	3.75085	3.45372	3.68177
TC0100001404.mm.1	4.22482	4.18941	4.3143	4.28915	4.18753	XR_140457	XR_140457	Jackson Lab	4.35848	4.26349	3.84817	4.13705	4.5169	4.30891	4.08983	4.18009	4.17881	4.15309	4.23211	4.32496	4.54706	4.22371	4.29672	4.45151	4.28124	4.19259	3.99513	4.39467	4.17613	4.26176	4.10996
TC0100001405.mm.1	6.42263	6.20594	6.20782	6.3444	6.36912	Gm23744	ENSMUST00000104231	predicted gene, 23744	6.3049	6.45412	6.72233	6.30816	6.32364	6.23365	6.31168	6.14932	6.12911	6.20638	6.33022	6.22504	6.06963	6.25532	6.30168	6.38558	6.38723	6.39221	6.33666	6.28621	6.58706	6.29256	6.34312
TC0100001406.mm.1	3.91385	3.9974	3.97914	4.00432	3.91542	NONMMUT003257	NONMMUT003257	NA	4.03249	3.96535	3.8325	3.95721	3.78167	4.02486	4.03647	3.92516	4.00311	4.00474	4.01612	3.78867	4.10702	4.0759	4.05171	3.97768	3.90485	4.01144	3.78182	3.88965	3.90736	3.98791	4.01036
TC0100001407.mm.1	3.50788	3.45094	3.57726	3.55627	3.52605	KnowTID_00000312	KnowTID_00000312	NA	3.78721	3.36353	3.37915	3.57602	3.4335	3.27964	3.48999	3.56709	3.46705	3.31817	3.66555	3.5451	3.78022	3.44606	3.40014	3.58554	3.56718	3.78243	3.49025	3.65275	3.63389	3.4902	3.36313
TC0100001408.mm.1	8.84357	8.79323	8.75808	8.84873	8.81014	KnowTID_00000313	KnowTID_00000313	NA	8.72884	8.91632	8.80213	8.89479	8.87578	8.73725	8.88284	8.75122	8.80159	8.64241	8.83042	8.77561	8.78385	8.97703	8.83367	8.88782	8.82186	8.7233	8.72789	8.82843	8.81224	8.77814	8.904
TC0100001409.mm.1	6.02754	5.918	6.12689	5.9248	5.99929	Tor1aip2	NM_001160180	torsin A interacting protein 2	6.00975	6.12697	6.00755	5.97372	6.01969	5.90035	5.86568	5.99219	5.91377	6.18353	6.13082	6.13503	6.05818	5.97683	5.90282	5.88868	5.95352	5.90217	6.06659	5.95669	5.99493	6.02952	5.94873
TC0100001410.mm.1	2.3082	2.36586	2.32484	2.32165	2.46348	NONMMUT003271	NONMMUT003271	NA	2.27343	2.21019	2.5284	2.48946	2.03953	2.38599	2.40102	2.31052	2.36593	1.9628	2.56763	2.19336	2.57558	2.28973	2.42177	2.5911	2.11957	2.18608	2.51084	2.47869	2.44049	2.55818	2.32922
TC0100001411.mm.1	1.19784	1.16423	1.28517	1.24241	1.28059	NONMMUT003273	NONMMUT003273	NA	1.23766	1.11478	1.16421	1.12909	1.34346	1.16517	1.11133	1.28569	1.09472	1.21776	1.29687	1.192	1.43406	1.19483	1.29603	1.21579	1.33134	1.17407	1.26875	1.30043	1.4261	1.20068	1.207
TC0100001412.mm.1	3.11525	2.98562	3.0519	3.06376	3.04611	Nphs2	NM_130456	nephrosis 2, podocin	3.13604	2.98501	3.06142	3.09604	3.29772	2.97012	2.90341	3.09193	2.97702	2.86647	3.17711	2.95465	3.20937	3.19777	2.97411	2.9853	3.0473	3.11433	2.91086	3.22262	3.00343	3.05	3.04363
TC0100001413.mm.1	1.33231	1.29773	1.52643	1.42097	1.34775	NONMMUT003278	NONMMUT003278	NA	1.39725	1.37161	1.36933	1.35607	1.16731	1.29418	1.42791	1.2088	1.26003	1.41277	1.34991	1.79965	1.54339	1.38813	1.496	1.44333	1.39229	1.38511	1.34071	1.24036	1.33227	1.33606	1.48934
TC0100001414.mm.1	9.82993	9.70075	9.58793	9.69124	9.74151	Rpl35	ENSMUST00000102782	ribosomal protein L35	9.6825	9.78933	10.0833	9.72448	9.87004	9.76516	9.67338	9.70556	9.65889	9.60763	9.56062	9.65883	9.52463	9.6566	9.73363	9.5733	9.7374	9.75528	9.69121	9.78674	9.9368	9.66789	9.62489
TC0100001415.mm.1	3.07725	3.08176	3.15155	3.15659	3.14953	KnowTID_00000314	KnowTID_00000314	NA	3.12667	2.98216	3.17372	2.93631	3.16741	3.13698	3.12362	3.06336	3.00309	2.93841	3.19355	3.12408	3.35015	3.15659	3.15935	3.28576	3.08594	3.09533	2.93544	3.24143	3.17085	3.17797	3.22198
TC0100001416.mm.1	2.41696	2.47175	2.32945	2.41914	2.34554	NONMMUT003284	NONMMUT003284	NA	2.29206	2.50674	2.57142	2.26417	2.45041	2.45353	2.47884	2.31918	2.63544	2.22744	2.38968	2.33395	2.36672	2.43819	2.46582	2.34371	2.27506	2.57294	2.28572	2.35645	2.43517	2.27048	2.37988
TC0100001417.mm.1	2.15875	1.98338	2.04628	2.02881	2.08509	NONMMUT003285	NONMMUT003285	NA	2.08929	2.16494	2.06911	2.31476	2.15563	2.18114	1.82131	1.95246	1.97859	1.97761	2.05211	1.94205	2.21335	2.10228	1.86415	1.96641	2.09693	2.11426	1.90711	2.33152	2.09969	2.06864	2.01847
[truncated: 64,557 more rows]
