# Supplementary material for: Potential Role of mRNAs and LncRNAs in Chronic Intermittent Hypoxia Exposure-Aggravated Atherosclerosis
Source: Front Genet. 2020 Apr 9;11:290. doi: 10.3389/fgene.2020.00290 (PMC7160761; doi:10.3389/fgene.2020.00290)
Supplement: Supplementary file 5 [file Table_4.XLSX]

## Sheet: Up CIH8W vs Nor8W
Supplementary Table S4 mRNAs GO analysis
Catergory	GO_ID	GO_Name	Population_mapped_id	Study_mapped_id	Enrichment	P_value	FDR
biological_process	GO:0002376	immune system process	385	90	4.542	1.06557e-34	1.95746e-31
biological_process	GO:0006954	inflammatory response	311	77	4.81	1.28887e-31	1.77573e-28
biological_process	GO:0045087	innate immune response	501	93	3.607	1.35263e-27	1.49087e-24
biological_process	GO:0030593	neutrophil chemotaxis	60	19	6.153	7.85924e-11	2.88748e-08
biological_process	GO:0002250	adaptive immune response	135	28	4.03	2.19265e-10	7.5523e-08
biological_process	GO:0032496	response to lipopolysaccharide	135	27	3.886	1.07774e-09	2.82829e-07
biological_process	GO:0006955	immune response	313	44	2.731	1.447e-09	3.62473e-07
biological_process	GO:0006935	chemotaxis	119	25	4.082	1.51565e-09	3.63162e-07
biological_process	GO:0002224	toll-like receptor signaling pathway	17	10	11.429	1.75791e-09	3.90968e-07
biological_process	GO:0006508	proteolysis	571	65	2.212	1.77358e-09	3.90968e-07
biological_process	GO:0032729	positive regulation of interferon-gamma production	51	16	6.095	2.86519e-09	6.07309e-07
biological_process	GO:0001525	angiogenesis	225	35	3.022	4.87787e-09	9.60069e-07
biological_process	GO:0050715	positive regulation of cytokine secretion	34	13	7.429	5.63133e-09	1.07015e-06
biological_process	GO:0050853	B cell receptor signaling pathway	160	28	3.4	1.21847e-08	2.23832e-06
biological_process	GO:0045766	positive regulation of angiogenesis	123	24	3.791	1.49527e-08	2.65821e-06
biological_process	GO:0050728	negative regulation of inflammatory response	88	20	4.416	1.58004e-08	2.72112e-06
biological_process	GO:0007229	integrin-mediated signaling pathway	66	17	5.004	2.56277e-08	3.92318e-06
biological_process	GO:0050766	positive regulation of phagocytosis	47	14	5.787	5.87991e-08	8.30876e-06
biological_process	GO:0009617	response to bacterium	34	12	6.857	6.25581e-08	8.40872e-06
biological_process	GO:0030335	positive regulation of cell migration	186	29	3.029	9.44233e-08	1.21016e-05
biological_process	GO:0070269	pyroptosis	10	7	13.6	9.84829e-08	1.2335e-05
biological_process	GO:0070374	positive regulation of ERK1 and ERK2 cascade	182	28	2.989	2.0802e-07	2.49217e-05
biological_process	GO:0002755	MyD88-dependent toll-like receptor signaling pathway	15	8	10.362	2.2407e-07	2.62734e-05
biological_process	GO:0007166	cell surface receptor signaling pathway	174	27	3.015	2.85838e-07	3.2148e-05
biological_process	GO:0007165	signal transduction	1243	105	1.641	3.60959e-07	3.82547e-05
biological_process	GO:0050702	interleukin-1 beta secretion	8	6	14.572	4.70397e-07	4.70614e-05
biological_process	GO:0030217	T cell differentiation	41	12	5.687	6.4452e-07	6.04158e-05
biological_process	GO:0050729	positive regulation of inflammatory response	49	13	5.155	7.73998e-07	7.10917e-05
biological_process	GO:0018108	peptidyl-tyrosine phosphorylation	65	15	4.484	7.91365e-07	7.14953e-05
biological_process	GO:0008360	regulation of cell shape	132	22	3.238	1.0311e-06	9.16512e-05
biological_process	GO:0042535	positive regulation of tumor necrosis factor biosynthetic process	13	7	10.462	1.2279e-06	0.000105734
biological_process	GO:0045576	mast cell activation	13	7	10.462	1.2279e-06	0.000105734
biological_process	GO:0032755	positive regulation of interleukin-6 production	51	13	4.953	1.2752e-06	0.000108117
biological_process	GO:0001774	microglial cell activation	18	8	8.635	1.32601e-06	0.000109069
biological_process	GO:0030889	negative regulation of B cell proliferation	18	8	8.635	1.32601e-06	0.000109069
biological_process	GO:0002218	activation of innate immune response	9	6	12.953	1.34934e-06	0.000109356
biological_process	GO:0042127	regulation of cell proliferation	225	30	2.591	1.77828e-06	0.00014203
biological_process	GO:0043029	T cell homeostasis	31	10	6.267	2.06779e-06	0.000160502
biological_process	GO:0006509	membrane protein ectodomain proteolysis	19	8	8.181	2.18683e-06	0.000167384
biological_process	GO:0007155	cell adhesion	510	52	1.981	2.24567e-06	0.000169533
biological_process	GO:0043065	positive regulation of apoptotic process	313	37	2.297	2.28976e-06	0.000170135
biological_process	GO:0006915	apoptotic process	552	55	1.936	2.33777e-06	0.000170135
biological_process	GO:0051279	regulation of release of sequestered calcium ion into cytosol	14	7	9.715	2.34627e-06	0.000170135
biological_process	GO:0016477	cell migration	194	27	2.704	2.52686e-06	0.000178533
biological_process	GO:0051092	positive regulation of NF-kappaB transcription factor activity	110	19	3.356	3.19977e-06	0.000216785
biological_process	GO:0050707	regulation of cytokine secretion	10	6	11.657	3.22561e-06	0.000216785
biological_process	GO:0048247	lymphocyte chemotaxis	26	9	6.725	3.47026e-06	0.00022563
biological_process	GO:0050718	positive regulation of interleukin-1 beta secretion	20	8	7.772	3.48005e-06	0.00022563
biological_process	GO:0019221	cytokine-mediated signaling pathway	143	22	2.989	4.06257e-06	0.000257727
biological_process	GO:0042742	defense response to bacterium	283	34	2.334	4.06863e-06	0.000257727
biological_process	GO:0015031	protein transport	579	56	1.879	4.68188e-06	0.000293203
biological_process	GO:0050731	positive regulation of peptidyl-tyrosine phosphorylation	103	18	3.395	4.86058e-06	0.000300974
biological_process	GO:0035556	intracellular signal transduction	405	43	2.063	6.07253e-06	0.000367755
biological_process	GO:0071726	cellular response to diacyl bacterial lipopeptide	4	4	19.429	6.98543e-06	0.000409539
biological_process	GO:1901299	negative regulation of hydrogen peroxide-mediated programmed cell death	4	4	19.429	6.98543e-06	0.000409539
biological_process	GO:0050830	defense response to Gram-positive bacterium	77	15	3.785	7.53684e-06	0.000432662
biological_process	GO:0007159	leukocyte cell-cell adhesion	22	8	7.065	8.05448e-06	0.000452941
biological_process	GO:0030574	collagen catabolic process	22	8	7.065	8.05448e-06	0.000452941
biological_process	GO:0006810	transport	1803	134	1.444	9.33062e-06	0.00051421
biological_process	GO:0001782	B cell homeostasis	29	9	6.03	9.66962e-06	0.000527617
biological_process	GO:0006911	phagocytosis, engulfment	151	22	2.831	9.99305e-06	0.000539919
biological_process	GO:0045579	positive regulation of B cell differentiation	17	7	8	1.15972e-05	0.000614539
biological_process	GO:0071222	cellular response to lipopolysaccharide	177	24	2.634	1.40061e-05	0.000721379
biological_process	GO:0071223	cellular response to lipoteichoic acid	8	5	12.143	1.76108e-05	0.000880377
biological_process	GO:0002548	monocyte chemotaxis	31	9	5.641	1.77321e-05	0.000880377
biological_process	GO:0050852	T cell receptor signaling pathway	47	11	4.547	2.01859e-05	0.000984464
biological_process	GO:0043123	positive regulation of I-kappaB kinase/NF-kappaB signaling	125	19	2.953	2.15224e-05	0.00104044
biological_process	GO:0008284	positive regulation of cell proliferation	470	46	1.902	2.41217e-05	0.00114939
biological_process	GO:0043547	positive regulation of GTPase activity	137	20	2.836	2.41932e-05	0.00114939
biological_process	GO:0032760	positive regulation of tumor necrosis factor production	57	12	4.09	2.69079e-05	0.00125669
biological_process	GO:0050859	negative regulation of B cell receptor signaling pathway	5	4	15.543	3.34934e-05	0.00152547
biological_process	GO:0051450	myoblast proliferation	5	4	15.543	3.34934e-05	0.00152547
biological_process	GO:0032486	Rap protein signal transduction	9	5	10.794	3.79375e-05	0.00168049
biological_process	GO:0006956	complement activation	14	6	8.327	3.85788e-05	0.00168049
biological_process	GO:0042267	natural killer cell mediated cytotoxicity	14	6	8.327	3.85788e-05	0.00168049
biological_process	GO:0048246	macrophage chemotaxis	14	6	8.327	3.85788e-05	0.00168049
biological_process	GO:1990001	inhibition of cysteine-type endopeptidase activity involved in apoptotic process	14	6	8.327	3.85788e-05	0.00168049
biological_process	GO:0010033	response to organic substance	59	12	3.952	3.87267e-05	0.00168049
biological_process	GO:0042110	T cell activation	34	9	5.143	4.01213e-05	0.00170083
biological_process	GO:1902042	negative regulation of extrinsic apoptotic signaling pathway via death domain receptors	27	8	5.757	4.44118e-05	0.00185419
biological_process	GO:0034097	response to cytokine	61	12	3.822	5.48013e-05	0.0022538
biological_process	GO:0032481	positive regulation of type I interferon production	15	6	7.772	6.14959e-05	0.00249194
biological_process	GO:0032695	negative regulation of interleukin-12 production	15	6	7.772	6.14959e-05	0.00249194
biological_process	GO:0007067	mitotic nuclear division	271	30	2.151	6.93097e-05	0.00277501
biological_process	GO:0051607	defense response to virus	136	19	2.714	7.07123e-05	0.00280356
biological_process	GO:0071404	cellular response to low-density lipoprotein particle stimulus	10	5	9.715	7.26495e-05	0.00283971
biological_process	GO:0006958	complement activation, classical pathway	160	21	2.55	7.63171e-05	0.00296186
biological_process	GO:0006468	protein phosphorylation	555	50	1.75	9.28974e-05	0.00352117
biological_process	GO:0006629	lipid metabolic process	454	43	1.84	9.32034e-05	0.00352117
biological_process	GO:0007599	hemostasis	46	10	4.224	9.39234e-05	0.00352117
biological_process	GO:0038083	peptidyl-tyrosine autophosphorylation	46	10	4.224	9.39234e-05	0.00352117
biological_process	GO:0070098	chemokine-mediated signaling pathway	46	10	4.224	9.39234e-05	0.00352117
biological_process	GO:0032715	negative regulation of interleukin-6 production	30	8	5.181	0.000102005	0.00377281
biological_process	GO:0031623	receptor internalization	38	9	4.602	0.000103545	0.00380425
biological_process	GO:0071356	cellular response to tumor necrosis factor	75	13	3.368	0.000107533	0.00392458
biological_process	GO:0007264	small GTPase mediated signal transduction	226	26	2.235	0.000109884	0.00395797
biological_process	GO:0050777	negative regulation of immune response	11	5	8.831	0.000127536	0.00451083
biological_process	GO:0034605	cellular response to heat	39	9	4.484	0.000128507	0.00451083
biological_process	GO:0002246	wound healing involved in inflammatory response	3	3	19.429	0.000136033	0.00454349
biological_process	GO:0002283	neutrophil activation involved in immune response	3	3	19.429	0.000136033	0.00454349
biological_process	GO:0032493	response to bacterial lipoprotein	3	3	19.429	0.000136033	0.00454349
biological_process	GO:0038094	Fc-gamma receptor signaling pathway	3	3	19.429	0.000136033	0.00454349
biological_process	GO:0051088	PMA-inducible membrane protein ectodomain proteolysis	3	3	19.429	0.000136033	0.00454349
biological_process	GO:0055099	response to high density lipoprotein particle	3	3	19.429	0.000136033	0.00454349
biological_process	GO:0070433	negative regulation of nucleotide-binding oligomerization domain containing 2 signaling pathway	3	3	19.429	0.000136033	0.00454349
biological_process	GO:0071727	cellular response to triacyl bacterial lipopeptide	3	3	19.429	0.000136033	0.00454349
biological_process	GO:0050732	negative regulation of peptidyl-tyrosine phosphorylation	17	6	6.857	0.000139117	0.00459085
biological_process	GO:0050860	negative regulation of T cell receptor signaling pathway	17	6	6.857	0.000139117	0.00459085
biological_process	GO:0016310	phosphorylation	609	53	1.691	0.000140507	0.00460914
biological_process	GO:0031532	actin cytoskeleton reorganization	50	10	3.886	0.0001963	0.00628959
biological_process	GO:0002237	response to molecule of bacterial origin	12	5	8.095	0.000209362	0.00663101
biological_process	GO:0032743	positive regulation of interleukin-2 production	12	5	8.095	0.000209362	0.00663101
biological_process	GO:0032611	interleukin-1 beta production	7	4	11.102	0.000215649	0.00667664
biological_process	GO:0045359	positive regulation of interferon-beta biosynthetic process	7	4	11.102	0.000215649	0.00667664
biological_process	GO:0045730	respiratory burst	7	4	11.102	0.000215649	0.00667664
biological_process	GO:0032728	positive regulation of interferon-beta production	26	7	5.231	0.000260836	0.00803053
biological_process	GO:0006801	superoxide metabolic process	19	6	6.136	0.000279072	0.00845037
biological_process	GO:0032720	negative regulation of tumor necrosis factor production	43	9	4.067	0.000284126	0.0085564
biological_process	GO:0002523	leukocyte migration involved in inflammatory response	13	5	7.473	0.000325807	0.00970553
biological_process	GO:0002092	positive regulation of receptor internalization	27	7	5.037	0.000336584	0.00991933
biological_process	GO:0043552	positive regulation of phosphatidylinositol 3-kinase activity	27	7	5.037	0.000336584	0.00991933
biological_process	GO:0007596	blood coagulation	74	12	3.151	0.000372914	0.0108737
biological_process	GO:0030301	cholesterol transport	20	6	5.829	0.000381389	0.010947
biological_process	GO:0032722	positive regulation of chemokine production	20	6	5.829	0.000381389	0.010947
biological_process	GO:0045780	positive regulation of bone resorption	20	6	5.829	0.000381389	0.010947
biological_process	GO:0070527	platelet aggregation	36	8	4.318	0.000400619	0.0111756
biological_process	GO:0001812	positive regulation of type I hypersensitivity	8	4	9.715	0.000413687	0.0111756
biological_process	GO:0006691	leukotriene metabolic process	8	4	9.715	0.000413687	0.0111756
biological_process	GO:0032494	response to peptidoglycan	8	4	9.715	0.000413687	0.0111756
biological_process	GO:0042116	macrophage activation	8	4	9.715	0.000413687	0.0111756
biological_process	GO:0044267	cellular protein metabolic process	8	4	9.715	0.000413687	0.0111756
biological_process	GO:0051301	cell division	358	34	1.845	0.000459661	0.0122971
biological_process	GO:0000902	cell morphogenesis	76	12	3.068	0.000479672	0.0125583
biological_process	GO:0016337	single organismal cell-cell adhesion	98	14	2.776	0.000484824	0.0125583
biological_process	GO:0001817	regulation of cytokine production	14	5	6.939	0.000485379	0.0125583
biological_process	GO:0006672	ceramide metabolic process	14	5	6.939	0.000485379	0.0125583
biological_process	GO:0050765	negative regulation of phagocytosis	14	5	6.939	0.000485379	0.0125583
biological_process	GO:0051016	barbed-end actin filament capping	14	5	6.939	0.000485379	0.0125583
biological_process	GO:0010628	positive regulation of gene expression	388	36	1.803	0.000492528	0.0126838
biological_process	GO:0001805	positive regulation of type III hypersensitivity	4	3	14.572	0.000523174	0.0129874
biological_process	GO:0001820	serotonin secretion	4	3	14.572	0.000523174	0.0129874
biological_process	GO:0002292	T cell differentiation involved in immune response	4	3	14.572	0.000523174	0.0129874
biological_process	GO:0006048	UDP-N-acetylglucosamine biosynthetic process	4	3	14.572	0.000523174	0.0129874
biological_process	GO:0034154	toll-like receptor 7 signaling pathway	4	3	14.572	0.000523174	0.0129874
biological_process	GO:0042981	regulation of apoptotic process	184	21	2.217	0.000537717	0.0130443
biological_process	GO:0006887	exocytosis	99	14	2.748	0.000538401	0.0130443
biological_process	GO:0006904	vesicle docking involved in exocytosis	29	7	4.69	0.00054056	0.0130443
biological_process	GO:0031663	lipopolysaccharide-mediated signaling pathway	29	7	4.69	0.00054056	0.0130443
biological_process	GO:0048661	positive regulation of smooth muscle cell proliferation	77	12	3.028	0.000542031	0.0130443
biological_process	GO:0034976	response to endoplasmic reticulum stress	67	11	3.19	0.000580573	0.013911
biological_process	GO:0006879	cellular iron ion homeostasis	38	8	4.09	0.000590901	0.0140364
biological_process	GO:0007040	lysosome organization	38	8	4.09	0.000590901	0.0140364
biological_process	GO:0051603	proteolysis involved in cellular protein catabolic process	57	10	3.409	0.000595373	0.014082
biological_process	GO:0007160	cell-matrix adhesion	78	12	2.989	0.000611064	0.0143301
biological_process	GO:0030218	erythrocyte differentiation	48	9	3.643	0.000670717	0.0154133
biological_process	GO:0033209	tumor necrosis factor-mediated signaling pathway	22	6	5.299	0.000671983	0.0154133
biological_process	GO:0045089	positive regulation of innate immune response	22	6	5.299	0.000671983	0.0154133
biological_process	GO:0008152	metabolic process	439	39	1.726	0.000687081	0.0156208
biological_process	GO:0030502	negative regulation of bone mineralization	15	5	6.476	0.00069732	0.0156208
biological_process	GO:0033627	cell adhesion mediated by integrin	15	5	6.476	0.00069732	0.0156208
biological_process	GO:2000114	regulation of establishment of cell polarity	15	5	6.476	0.00069732	0.0156208
biological_process	GO:0008608	attachment of spindle microtubules to kinetochore	9	4	8.635	0.000714287	0.0156208
biological_process	GO:0042088	T-helper 1 type immune response	9	4	8.635	0.000714287	0.0156208
biological_process	GO:0043534	blood vessel endothelial cell migration	9	4	8.635	0.000714287	0.0156208
biological_process	GO:0045906	negative regulation of vasoconstriction	9	4	8.635	0.000714287	0.0156208
biological_process	GO:0060055	angiogenesis involved in wound healing	9	4	8.635	0.000714287	0.0156208
biological_process	GO:0007169	transmembrane receptor protein tyrosine kinase signaling pathway	102	14	2.667	0.000730275	0.0158447
biological_process	GO:0042130	negative regulation of T cell proliferation	40	8	3.886	0.00084821	0.0181182
biological_process	GO:0003333	amino acid transmembrane transport	23	6	5.068	0.000869858	0.0184376
biological_process	GO:0043542	endothelial cell migration	23	6	5.068	0.000869858	0.0184376
biological_process	GO:0050727	regulation of inflammatory response	60	10	3.238	0.000904097	0.01909
biological_process	GO:0010759	positive regulation of macrophage chemotaxis	16	5	6.072	0.000971506	0.0201277
biological_process	GO:0030261	chromosome condensation	16	5	6.072	0.000971506	0.0201277
biological_process	GO:0034314	Arp2/3 complex-mediated actin nucleation	16	5	6.072	0.000971506	0.0201277
biological_process	GO:2001222	regulation of neuron migration	16	5	6.072	0.000971506	0.0201277
biological_process	GO:0010575	positive regulation of vascular endothelial growth factor production	24	6	4.857	0.00110973	0.02282
biological_process	GO:0030833	regulation of actin filament polymerization	24	6	4.857	0.00110973	0.02282
biological_process	GO:0006910	phagocytosis, recognition	143	17	2.31	0.00111467	0.0228363
biological_process	GO:0001974	blood vessel remodeling	42	8	3.701	0.00118844	0.0239833
biological_process	GO:0051897	positive regulation of protein kinase B signaling	84	12	2.776	0.00119838	0.0239833
biological_process	GO:0001922	B-1 B cell homeostasis	5	3	11.657	0.0012577	0.0239833
biological_process	GO:0002322	B cell proliferation involved in immune response	5	3	11.657	0.0012577	0.0239833
biological_process	GO:0010543	regulation of platelet activation	5	3	11.657	0.0012577	0.0239833
biological_process	GO:0010572	positive regulation of platelet activation	5	3	11.657	0.0012577	0.0239833
biological_process	GO:0032367	intracellular cholesterol transport	5	3	11.657	0.0012577	0.0239833
biological_process	GO:0045621	positive regulation of lymphocyte differentiation	5	3	11.657	0.0012577	0.0239833
biological_process	GO:0051653	spindle localization	5	3	11.657	0.0012577	0.0239833
biological_process	GO:0070934	CRD-mediated mRNA stabilization	5	3	11.657	0.0012577	0.0239833
biological_process	GO:1900227	positive regulation of NLRP3 inflammasome complex assembly	5	3	11.657	0.0012577	0.0239833
biological_process	GO:2000427	positive regulation of apoptotic cell clearance	5	3	11.657	0.0012577	0.0239833
biological_process	GO:2001056	positive regulation of cysteine-type endopeptidase activity	5	3	11.657	0.0012577	0.0239833
biological_process	GO:2001181	positive regulation of interleukin-10 secretion	5	3	11.657	0.0012577	0.0239833
biological_process	GO:0043032	positive regulation of macrophage activation	17	5	5.714	0.00131834	0.0247964
biological_process	GO:0050870	positive regulation of T cell activation	17	5	5.714	0.00131834	0.0247964
biological_process	GO:0001932	regulation of protein phosphorylation	63	10	3.084	0.00133331	0.0249081
biological_process	GO:0045454	cell redox homeostasis	63	10	3.084	0.00133331	0.0249081
biological_process	GO:0009611	response to wounding	43	8	3.615	0.00139515	0.0258389
biological_process	GO:0033344	cholesterol efflux	25	6	4.663	0.0013972	0.0258389
biological_process	GO:0071346	cellular response to interferon-gamma	53	9	3.299	0.00140781	0.0258615
biological_process	GO:0071347	cellular response to interleukin-1	53	9	3.299	0.00140781	0.0258615
biological_process	GO:0043066	negative regulation of apoptotic process	488	41	1.632	0.00149419	0.0271765
biological_process	GO:0071407	cellular response to organic cyclic compound	54	9	3.238	0.00161349	0.0292498
biological_process	GO:0016485	protein processing	76	11	2.812	0.00169825	0.0300274
biological_process	GO:0043154	negative regulation of cysteine-type endopeptidase activity involved in apoptotic process	65	10	2.989	0.00170214	0.0300274
biological_process	GO:0030101	natural killer cell activation	11	4	7.065	0.00172177	0.0300274
biological_process	GO:0032495	response to muramyl dipeptide	11	4	7.065	0.00172177	0.0300274
biological_process	GO:0032691	negative regulation of interleukin-1 beta production	11	4	7.065	0.00172177	0.0300274
biological_process	GO:0034142	toll-like receptor 4 signaling pathway	11	4	7.065	0.00172177	0.0300274
biological_process	GO:0042554	superoxide anion generation	11	4	7.065	0.00172177	0.0300274
biological_process	GO:0046641	positive regulation of alpha-beta T cell proliferation	11	4	7.065	0.00172177	0.0300274
biological_process	GO:0051272	positive regulation of cellular component movement	11	4	7.065	0.00172177	0.0300274
biological_process	GO:0060100	positive regulation of phagocytosis, engulfment	11	4	7.065	0.00172177	0.0300274
biological_process	GO:0031589	cell-substrate adhesion	18	5	5.397	0.00174862	0.0302088
biological_process	GO:0042346	positive regulation of NF-kappaB import into nucleus	18	5	5.397	0.00174862	0.0302088
biological_process	GO:0050868	negative regulation of T cell activation	18	5	5.397	0.00174862	0.0302088
biological_process	GO:0048514	blood vessel morphogenesis	35	7	3.886	0.00177865	0.0306317
biological_process	GO:0060326	cell chemotaxis	55	9	3.179	0.00184257	0.0316337
biological_process	GO:0005975	carbohydrate metabolic process	190	20	2.045	0.00194836	0.033346
biological_process	GO:0045785	positive regulation of cell adhesion	56	9	3.123	0.00209692	0.0357774
biological_process	GO:0000910	cytokinesis	36	7	3.778	0.00211128	0.0359113
biological_process	GO:0046777	protein autophosphorylation	178	19	2.074	0.00212601	0.0359315
biological_process	GO:0090023	positive regulation of neutrophil chemotaxis	27	6	4.318	0.00213855	0.0359315
biological_process	GO:0008630	intrinsic apoptotic signaling pathway in response to DNA damage	46	8	3.379	0.00219062	0.0364857
biological_process	GO:0030307	positive regulation of cell growth	90	12	2.591	0.00219139	0.0364857
biological_process	GO:0002693	positive regulation of cellular extravasation	6	3	9.715	0.00241903	0.0371192
biological_process	GO:0009620	response to fungus	6	3	9.715	0.00241903	0.0371192
biological_process	GO:0033004	negative regulation of mast cell activation	6	3	9.715	0.00241903	0.0371192
biological_process	GO:0043305	negative regulation of mast cell degranulation	6	3	9.715	0.00241903	0.0371192
biological_process	GO:0045588	positive regulation of gamma-delta T cell differentiation	6	3	9.715	0.00241903	0.0371192
biological_process	GO:0070723	response to cholesterol	6	3	9.715	0.00241903	0.0371192
biological_process	GO:2000391	positive regulation of neutrophil extravasation	6	3	9.715	0.00241903	0.0371192
biological_process	GO:0001775	cell activation	12	4	6.476	0.00247797	0.0371192
biological_process	GO:0007252	I-kappaB phosphorylation	12	4	6.476	0.00247797	0.0371192
biological_process	GO:0016045	detection of bacterium	12	4	6.476	0.00247797	0.0371192
biological_process	GO:0032700	negative regulation of interleukin-17 production	12	4	6.476	0.00247797	0.0371192
biological_process	GO:0032740	positive regulation of interleukin-17 production	12	4	6.476	0.00247797	0.0371192
biological_process	GO:0033630	positive regulation of cell adhesion mediated by integrin	12	4	6.476	0.00247797	0.0371192
biological_process	GO:0007204	positive regulation of cytosolic calcium ion concentration	141	16	2.205	0.00249218	0.0371192
biological_process	GO:0001909	leukocyte mediated cytotoxicity	2	2	19.429	0.00264704	0.0371192
biological_process	GO:0002366	leukocyte activation involved in immune response	2	2	19.429	0.00264704	0.0371192
biological_process	GO:0002431	Fc receptor mediated stimulatory signaling pathway	2	2	19.429	0.00264704	0.0371192
biological_process	GO:0002537	nitric oxide production involved in inflammatory response	2	2	19.429	0.00264704	0.0371192
biological_process	GO:0002588	positive regulation of antigen processing and presentation of peptide antigen via MHC class II	2	2	19.429	0.00264704	0.0371192
biological_process	GO:0002902	regulation of B cell apoptotic process	2	2	19.429	0.00264704	0.0371192
biological_process	GO:0010810	regulation of cell-substrate adhesion	2	2	19.429	0.00264704	0.0371192
biological_process	GO:0033206	meiotic cytokinesis	2	2	19.429	0.00264704	0.0371192
biological_process	GO:0034125	negative regulation of MyD88-dependent toll-like receptor signaling pathway	2	2	19.429	0.00264704	0.0371192
biological_process	GO:0034381	plasma lipoprotein particle clearance	2	2	19.429	0.00264704	0.0371192
biological_process	GO:0035772	interleukin-13-mediated signaling pathway	2	2	19.429	0.00264704	0.0371192
biological_process	GO:0038065	collagen-activated signaling pathway	2	2	19.429	0.00264704	0.0371192
biological_process	GO:0042495	detection of triacyl bacterial lipopeptide	2	2	19.429	0.00264704	0.0371192
biological_process	GO:0042496	detection of diacyl bacterial lipopeptide	2	2	19.429	0.00264704	0.0371192
biological_process	GO:0045428	regulation of nitric oxide biosynthetic process	2	2	19.429	0.00264704	0.0371192
biological_process	GO:0070571	negative regulation of neuron projection regeneration	2	2	19.429	0.00264704	0.0371192
biological_process	GO:0071226	cellular response to molecule of fungal origin	2	2	19.429	0.00264704	0.0371192
biological_process	GO:0090265	positive regulation of immune complex clearance by monocytes and macrophages	2	2	19.429	0.00264704	0.0371192
biological_process	GO:1902202	regulation of hepatocyte growth factor receptor signaling pathway	2	2	19.429	0.00264704	0.0371192
biological_process	GO:1902227	negative regulation of macrophage colony-stimulating factor signaling pathway	2	2	19.429	0.00264704	0.0371192
biological_process	GO:1903334	positive regulation of protein folding	2	2	19.429	0.00264704	0.0371192
biological_process	GO:2000473	positive regulation of hematopoietic stem cell migration	2	2	19.429	0.00264704	0.0371192
biological_process	GO:2000521	negative regulation of immunological synapse formation	2	2	19.429	0.00264704	0.0371192
biological_process	GO:2001189	negative regulation of T cell activation via T cell receptor contact with antigen bound to MHC molecule on antigen presenting cell	2	2	19.429	0.00264704	0.0371192
biological_process	GO:0031647	regulation of protein stability	69	10	2.816	0.00268674	0.0375802
biological_process	GO:0042542	response to hydrogen peroxide	38	7	3.579	0.0029188	0.0404159
biological_process	GO:0042493	response to drug	145	16	2.144	0.00330461	0.0450813
biological_process	GO:0043087	regulation of GTPase activity	71	10	2.736	0.00332637	0.0452633
biological_process	GO:0032930	positive regulation of superoxide anion generation	13	4	5.978	0.00343448	0.0465048
biological_process	GO:0045824	negative regulation of innate immune response	13	4	5.978	0.00343448	0.0465048
biological_process	GO:0022409	positive regulation of cell-cell adhesion	21	5	4.626	0.00365205	0.049209
biological_process	GO:0006909	phagocytosis	50	8	3.109	0.00376026	0.050425
biological_process	GO:0050776	regulation of immune response	30	6	3.886	0.0037606	0.050425
biological_process	GO:0050714	positive regulation of protein secretion	40	7	3.4	0.00394362	0.0520612
biological_process	GO:0016311	dephosphorylation	109	13	2.317	0.00397044	0.0520612
biological_process	GO:0010803	regulation of tumor necrosis factor-mediated signaling pathway	7	3	8.327	0.00407156	0.0520612
biological_process	GO:0031346	positive regulation of cell projection organization	7	3	8.327	0.00407156	0.0520612
biological_process	GO:0033993	response to lipid	7	3	8.327	0.00407156	0.0520612
biological_process	GO:0034144	negative regulation of toll-like receptor 4 signaling pathway	7	3	8.327	0.00407156	0.0520612
biological_process	GO:0043619	regulation of transcription from RNA polymerase II promoter in response to oxidative stress	7	3	8.327	0.00407156	0.0520612
biological_process	GO:0044351	macropinocytosis	7	3	8.327	0.00407156	0.0520612
biological_process	GO:0050665	hydrogen peroxide biosynthetic process	7	3	8.327	0.00407156	0.0520612
biological_process	GO:0050856	regulation of T cell receptor signaling pathway	7	3	8.327	0.00407156	0.0520612
biological_process	GO:0050861	positive regulation of B cell receptor signaling pathway	7	3	8.327	0.00407156	0.0520612
biological_process	GO:0050869	negative regulation of B cell activation	7	3	8.327	0.00407156	0.0520612
biological_process	GO:0070542	response to fatty acid	7	3	8.327	0.00407156	0.0520612
biological_process	GO:0072540	T-helper 17 cell lineage commitment	7	3	8.327	0.00407156	0.0520612
biological_process	GO:0043406	positive regulation of MAP kinase activity	51	8	3.048	0.00426271	0.0539244
biological_process	GO:0042632	cholesterol homeostasis	62	9	2.82	0.0042662	0.0539244
biological_process	GO:0000281	mitotic cytokinesis	31	6	3.76	0.00446339	0.0560313
biological_process	GO:2000379	positive regulation of reactive oxygen species metabolic process	31	6	3.76	0.00446339	0.0560313
biological_process	GO:0002230	positive regulation of defense response to virus by host	22	5	4.416	0.00452854	0.0561334
biological_process	GO:0006928	movement of cell or subcellular component	22	5	4.416	0.00452854	0.0561334
biological_process	GO:0034612	response to tumor necrosis factor	22	5	4.416	0.00452854	0.0561334
biological_process	GO:1902895	positive regulation of pri-miRNA transcription from RNA polymerase II promoter	22	5	4.416	0.00452854	0.0561334
biological_process	GO:0006855	drug transmembrane transport	14	4	5.551	0.00461413	0.0561334
biological_process	GO:0010875	positive regulation of cholesterol efflux	14	4	5.551	0.00461413	0.0561334
biological_process	GO:0030195	negative regulation of blood coagulation	14	4	5.551	0.00461413	0.0561334
biological_process	GO:0033160	positive regulation of protein import into nucleus, translocation	14	4	5.551	0.00461413	0.0561334
biological_process	GO:0046835	carbohydrate phosphorylation	14	4	5.551	0.00461413	0.0561334
biological_process	GO:0048771	tissue remodeling	14	4	5.551	0.00461413	0.0561334
biological_process	GO:0060993	kidney morphogenesis	14	4	5.551	0.00461413	0.0561334
biological_process	GO:0035690	cellular response to drug	52	8	2.989	0.00481525	0.0584512
biological_process	GO:0008285	negative regulation of cell proliferation	368	31	1.637	0.00508328	0.0615691
biological_process	GO:0007049	cell cycle	603	46	1.482	0.00520772	0.0628004
biological_process	GO:0030890	positive regulation of B cell proliferation	42	7	3.238	0.00522021	0.0628134
biological_process	GO:0007249	I-kappaB kinase/NF-kappaB signaling	32	6	3.643	0.00525835	0.0629974
biological_process	GO:0097192	extrinsic apoptotic signaling pathway in absence of ligand	32	6	3.643	0.00525835	0.0629974
biological_process	GO:0001666	response to hypoxia	113	13	2.235	0.00540271	0.0645864
biological_process	GO:0015991	ATP hydrolysis coupled proton transport	23	5	4.224	0.00554485	0.0657154
biological_process	GO:0032733	positive regulation of interleukin-10 production	23	5	4.224	0.00554485	0.0657154
biological_process	GO:0050850	positive regulation of calcium-mediated signaling	23	5	4.224	0.00554485	0.0657154
biological_process	GO:0007162	negative regulation of cell adhesion	43	7	3.163	0.00596397	0.0697646
biological_process	GO:0007265	Ras protein signal transduction	43	7	3.163	0.00596397	0.0697646
biological_process	GO:0001913	T cell mediated cytotoxicity	15	4	5.181	0.00603842	0.0697646
biological_process	GO:0006693	prostaglandin metabolic process	15	4	5.181	0.00603842	0.0697646
biological_process	GO:0008015	blood circulation	15	4	5.181	0.00603842	0.0697646
biological_process	GO:0043306	positive regulation of mast cell degranulation	15	4	5.181	0.00603842	0.0697646
biological_process	GO:0045779	negative regulation of bone resorption	15	4	5.181	0.00603842	0.0697646
biological_process	GO:0071425	hematopoietic stem cell proliferation	15	4	5.181	0.00603842	0.0697646
biological_process	GO:0090026	positive regulation of monocyte chemotaxis	15	4	5.181	0.00603842	0.0697646
biological_process	GO:2000249	regulation of actin cytoskeleton reorganization	15	4	5.181	0.00603842	0.0697646
biological_process	GO:0001798	positive regulation of type IIa hypersensitivity	8	3	7.286	0.00626629	0.070333
biological_process	GO:0002446	neutrophil mediated immunity	8	3	7.286	0.00626629	0.070333
biological_process	GO:0002675	positive regulation of acute inflammatory response	8	3	7.286	0.00626629	0.070333
biological_process	GO:0032836	glomerular basement membrane development	8	3	7.286	0.00626629	0.070333
biological_process	GO:0045084	positive regulation of interleukin-12 biosynthetic process	8	3	7.286	0.00626629	0.070333
biological_process	GO:0045416	positive regulation of interleukin-8 biosynthetic process	8	3	7.286	0.00626629	0.070333
biological_process	GO:0048387	negative regulation of retinoic acid receptor signaling pathway	8	3	7.286	0.00626629	0.070333
biological_process	GO:0050764	regulation of phagocytosis	8	3	7.286	0.00626629	0.070333
biological_process	GO:0060907	positive regulation of macrophage cytokine production	8	3	7.286	0.00626629	0.070333
biological_process	GO:0030036	actin cytoskeleton organization	142	15	2.052	0.00652794	0.0729725
biological_process	GO:0060548	negative regulation of cell death	78	10	2.491	0.00656604	0.0732499
biological_process	GO:0045453	bone resorption	24	5	4.048	0.00671198	0.0742766
biological_process	GO:0008283	cell proliferation	212	20	1.833	0.006751	0.0743205
biological_process	GO:0009968	negative regulation of signal transduction	55	8	2.826	0.006805	0.0743205
biological_process	GO:0006665	sphingolipid metabolic process	34	6	3.429	0.00715165	0.0743205
biological_process	GO:0006919	activation of cysteine-type endopeptidase activity involved in apoptotic process	67	9	2.61	0.00715831	0.0743205
biological_process	GO:0032088	negative regulation of NF-kappaB transcription factor activity	67	9	2.61	0.00715831	0.0743205
biological_process	GO:0030336	negative regulation of cell migration	104	12	2.242	0.00718721	0.0743205
biological_process	GO:0001787	natural killer cell proliferation	3	2	12.953	0.00766906	0.0743205
biological_process	GO:0001915	negative regulation of T cell mediated cytotoxicity	3	2	12.953	0.00766906	0.0743205
biological_process	GO:0002277	myeloid dendritic cell activation involved in immune response	3	2	12.953	0.00766906	0.0743205
biological_process	GO:0002337	B-1a B cell differentiation	3	2	12.953	0.00766906	0.0743205
biological_process	GO:0002513	tolerance induction to self antigen	3	2	12.953	0.00766906	0.0743205
biological_process	GO:0002554	serotonin secretion by platelet	3	2	12.953	0.00766906	0.0743205
biological_process	GO:0002685	regulation of leukocyte migration	3	2	12.953	0.00766906	0.0743205
biological_process	GO:0002826	negative regulation of T-helper 1 type immune response	3	2	12.953	0.00766906	0.0743205
biological_process	GO:0002924	negative regulation of humoral immune response mediated by circulating immunoglobulin	3	2	12.953	0.00766906	0.0743205
biological_process	GO:0008356	asymmetric cell division	3	2	12.953	0.00766906	0.0743205
biological_process	GO:0009191	ribonucleoside diphosphate catabolic process	3	2	12.953	0.00766906	0.0743205
biological_process	GO:0016344	meiotic chromosome movement towards spindle pole	3	2	12.953	0.00766906	0.0743205
biological_process	GO:0018242	protein O-linked glycosylation via serine	3	2	12.953	0.00766906	0.0743205
biological_process	GO:0032310	prostaglandin secretion	3	2	12.953	0.00766906	0.0743205
biological_process	GO:0032782	bile acid secretion	3	2	12.953	0.00766906	0.0743205
biological_process	GO:0033003	regulation of mast cell activation	3	2	12.953	0.00766906	0.0743205
biological_process	GO:0033031	positive regulation of neutrophil apoptotic process	3	2	12.953	0.00766906	0.0743205
biological_process	GO:0034395	regulation of transcription from RNA polymerase II promoter in response to iron	3	2	12.953	0.00766906	0.0743205
biological_process	GO:0035590	purinergic nucleotide receptor signaling pathway	3	2	12.953	0.00766906	0.0743205
biological_process	GO:0042117	monocyte activation	3	2	12.953	0.00766906	0.0743205
biological_process	GO:0042531	positive regulation of tyrosine phosphorylation of STAT protein	3	2	12.953	0.00766906	0.0743205
biological_process	GO:0045401	positive regulation of interleukin-3 biosynthetic process	3	2	12.953	0.00766906	0.0743205
biological_process	GO:0045425	positive regulation of granulocyte macrophage colony-stimulating factor biosynthetic process	3	2	12.953	0.00766906	0.0743205
biological_process	GO:0046209	nitric oxide metabolic process	3	2	12.953	0.00766906	0.0743205
biological_process	GO:0050855	regulation of B cell receptor signaling pathway	3	2	12.953	0.00766906	0.0743205
biological_process	GO:0051445	regulation of meiotic cell cycle	3	2	12.953	0.00766906	0.0743205
biological_process	GO:0060139	positive regulation of apoptotic process by virus	3	2	12.953	0.00766906	0.0743205
biological_process	GO:0061097	regulation of protein tyrosine kinase activity	3	2	12.953	0.00766906	0.0743205
biological_process	GO:0070358	actin polymerization-dependent cell motility	3	2	12.953	0.00766906	0.0743205
biological_process	GO:0071221	cellular response to bacterial lipopeptide	3	2	12.953	0.00766906	0.0743205
biological_process	GO:0071621	granulocyte chemotaxis	3	2	12.953	0.00766906	0.0743205
biological_process	GO:0071663	positive regulation of granzyme B production	3	2	12.953	0.00766906	0.0743205
biological_process	GO:0072697	protein localization to cell cortex	3	2	12.953	0.00766906	0.0743205
biological_process	GO:1900158	negative regulation of bone mineralization involved in bone maturation	3	2	12.953	0.00766906	0.0743205
biological_process	GO:1900740	positive regulation of protein insertion into mitochondrial membrane involved in apoptotic signaling pathway	3	2	12.953	0.00766906	0.0743205
biological_process	GO:1903588	negative regulation of blood vessel endothelial cell proliferation involved in sprouting angiogenesis	3	2	12.953	0.00766906	0.0743205
biological_process	GO:2000373	positive regulation of DNA topoisomerase (ATP-hydrolyzing) activity	3	2	12.953	0.00766906	0.0743205
biological_process	GO:0006491	N-glycan processing	16	4	4.857	0.00772739	0.0743205
biological_process	GO:0007250	activation of NF-kappaB-inducing kinase activity	16	4	4.857	0.00772739	0.0743205
biological_process	GO:0030595	leukocyte chemotaxis	16	4	4.857	0.00772739	0.0743205
biological_process	GO:0043277	apoptotic cell clearance	16	4	4.857	0.00772739	0.0743205
biological_process	GO:0044344	cellular response to fibroblast growth factor stimulus	16	4	4.857	0.00772739	0.0743205
biological_process	GO:0050832	defense response to fungus	16	4	4.857	0.00772739	0.0743205
biological_process	GO:0001889	liver development	68	9	2.572	0.00788322	0.0755555
biological_process	GO:0010332	response to gamma radiation	25	5	3.886	0.00804068	0.0762688
biological_process	GO:0014065	phosphatidylinositol 3-kinase signaling	25	5	3.886	0.00804068	0.0762688
biological_process	GO:0030099	myeloid cell differentiation	25	5	3.886	0.00804068	0.0762688
biological_process	GO:0032456	endocytic recycling	25	5	3.886	0.00804068	0.0762688
biological_process	GO:0032757	positive regulation of interleukin-8 production	25	5	3.886	0.00804068	0.0762688
biological_process	GO:0030073	insulin secretion	35	6	3.331	0.0082633	0.0779778
biological_process	GO:0070059	intrinsic apoptotic signaling pathway in response to endoplasmic reticulum stress	35	6	3.331	0.0082633	0.0779778
biological_process	GO:0015992	proton transport	57	8	2.727	0.00844049	0.0795138
biological_process	GO:0007059	chromosome segregation	81	10	2.399	0.00854018	0.0803155
biological_process	GO:0002244	hematopoietic progenitor cell differentiation	94	11	2.274	0.00887229	0.0819606
biological_process	GO:0002281	macrophage activation involved in immune response	9	3	6.476	0.00904229	0.0819606
biological_process	GO:0006353	DNA-templated transcription, termination	9	3	6.476	0.00904229	0.0819606
biological_process	GO:0006488	dolichol-linked oligosaccharide biosynthetic process	9	3	6.476	0.00904229	0.0819606
biological_process	GO:0006892	post-Golgi vesicle-mediated transport	9	3	6.476	0.00904229	0.0819606
biological_process	GO:0010447	response to acidic pH	9	3	6.476	0.00904229	0.0819606
biological_process	GO:0030098	lymphocyte differentiation	9	3	6.476	0.00904229	0.0819606
biological_process	GO:0034501	protein localization to kinetochore	9	3	6.476	0.00904229	0.0819606
biological_process	GO:0042428	serotonin metabolic process	9	3	6.476	0.00904229	0.0819606
biological_process	GO:0043304	regulation of mast cell degranulation	9	3	6.476	0.00904229	0.0819606
biological_process	GO:0045410	positive regulation of interleukin-6 biosynthetic process	9	3	6.476	0.00904229	0.0819606
biological_process	GO:0045646	regulation of erythrocyte differentiation	9	3	6.476	0.00904229	0.0819606
biological_process	GO:0050798	activated T cell proliferation	9	3	6.476	0.00904229	0.0819606
biological_process	GO:0061032	visceral serous pericardium development	9	3	6.476	0.00904229	0.0819606
biological_process	GO:0097011	cellular response to granulocyte macrophage colony-stimulating factor stimulus	9	3	6.476	0.00904229	0.0819606
biological_process	GO:0042147	retrograde transport, endosome to Golgi	58	8	2.68	0.0093607	0.0845686
biological_process	GO:0051017	actin filament bundle assembly	36	6	3.238	0.00949371	0.0852608
biological_process	GO:0042060	wound healing	70	9	2.498	0.00949921	0.0852608
biological_process	GO:0001841	neural tube formation	17	4	4.572	0.00969941	0.0860764
biological_process	GO:0001921	positive regulation of receptor recycling	17	4	4.572	0.00969941	0.0860764
biological_process	GO:0043171	peptide catabolic process	17	4	4.572	0.00969941	0.0860764
biological_process	GO:2000573	positive regulation of DNA biosynthetic process	17	4	4.572	0.00969941	0.0860764
biological_process	GO:0016049	cell growth	47	7	2.894	0.00974694	0.0862206
cellular_component	GO:0016020	membrane	6929	586	1.643	1.56414e-45	8.61999e-42
cellular_component	GO:0070062	extracellular exosome	2588	279	2.095	7.92308e-35	1.95746e-31
cellular_component	GO:0005886	plasma membrane	3692	321	1.689	3.54312e-23	3.25436e-20
cellular_component	GO:0009897	external side of plasma membrane	413	75	3.528	7.52159e-22	5.92164e-19
cellular_component	GO:0005737	cytoplasm	5599	428	1.485	1.61155e-20	9.86804e-18
cellular_component	GO:0005764	lysosome	333	60	3.501	1.48822e-17	8.20158e-15
cellular_component	GO:0009986	cell surface	593	76	2.49	2.04544e-13	9.39366e-11
cellular_component	GO:0005829	cytosol	2743	223	1.58	1.29687e-12	5.49773e-10
cellular_component	GO:0005615	extracellular space	1536	142	1.796	4.93422e-12	1.94232e-09
cellular_component	GO:0005794	Golgi apparatus	1166	111	1.85	2.37084e-10	7.68569e-08
cellular_component	GO:0005783	endoplasmic reticulum	1328	122	1.785	2.70412e-10	8.26473e-08
cellular_component	GO:0016021	integral component of membrane	5298	364	1.335	2.99936e-10	8.26473e-08
cellular_component	GO:0005768	endosome	557	61	2.128	2.38598e-08	3.82312e-06
cellular_component	GO:0005925	focal adhesion	355	45	2.463	2.42547e-08	3.82312e-06
cellular_component	GO:0002102	podosome	26	11	8.22	2.42804e-08	3.82312e-06
cellular_component	GO:0045121	membrane raft	248	35	2.742	6.14573e-08	8.40872e-06
cellular_component	GO:0005765	lysosomal membrane	173	28	3.145	6.96043e-08	9.13308e-06
cellular_component	GO:0005576	extracellular region	1634	130	1.546	3.95332e-07	4.03458e-05
cellular_component	GO:0043231	intracellular membrane-bounded organelle	791	74	1.818	5.15828e-07	4.98724e-05
cellular_component	GO:0072557	IPAF inflammasome complex	6	5	16.191	2.05872e-06	0.000160502
cellular_component	GO:0005887	integral component of plasma membrane	1003	86	1.666	2.37743e-06	0.000170156
cellular_component	GO:0048471	perinuclear region of cytoplasm	568	56	1.916	2.62137e-06	0.000182865
cellular_component	GO:0005913	cell-cell adherens junction	317	37	2.268	3.09119e-06	0.000212944
cellular_component	GO:0008305	integrin complex	26	9	6.725	3.47026e-06	0.00022563
cellular_component	GO:0030175	filopodium	59	13	4.281	7.38381e-06	0.000428338
cellular_component	GO:0030496	midbody	118	19	3.128	9.25254e-06	0.00051421
cellular_component	GO:0030027	lamellipodium	142	21	2.873	1.24921e-05	0.000655657
cellular_component	GO:0072562	blood microparticle	237	29	2.377	1.42961e-05	0.000729498
cellular_component	GO:0031234	extrinsic component of cytoplasmic side of plasma membrane	75	14	3.627	2.50342e-05	0.00117918
cellular_component	GO:0001726	ruffle	78	14	3.487	3.95825e-05	0.001691
cellular_component	GO:0031410	cytoplasmic vesicle	656	58	1.718	4.48494e-05	0.00185838
cellular_component	GO:0005902	microvillus	72	13	3.508	6.94887e-05	0.00277501
cellular_component	GO:0005634	nucleus	5677	349	1.194	7.26546e-05	0.00283971
cellular_component	GO:0061702	inflammasome complex	6	4	12.953	9.63628e-05	0.00358821
cellular_component	GO:0005911	cell-cell junction	195	23	2.292	0.000184807	0.00597174
cellular_component	GO:0005730	nucleolus	695	58	1.621	0.000212161	0.00667664
cellular_component	GO:0001772	immunological synapse	34	8	4.572	0.000263404	0.00806457
cellular_component	GO:0005654	nucleoplasm	1806	126	1.356	0.000272809	0.00830635
cellular_component	GO:0031012	extracellular matrix	285	29	1.977	0.00038528	0.0110014
cellular_component	GO:0000778	condensed nuclear chromosome kinetochore	8	4	9.715	0.000413687	0.0111756
cellular_component	GO:0000796	condensin complex	8	4	9.715	0.000413687	0.0111756
cellular_component	GO:0031252	cell leading edge	55	10	3.533	0.000442625	0.011899
cellular_component	GO:0005770	late endosome	121	16	2.569	0.000481933	0.0125583
cellular_component	GO:0070820	tertiary granule	4	3	14.572	0.000523174	0.0129874
cellular_component	GO:0097169	AIM2 inflammasome complex	4	3	14.572	0.000523174	0.0129874
cellular_component	GO:0071203	WASH complex	9	4	8.635	0.000714287	0.0156208
cellular_component	GO:0005856	cytoskeleton	1115	82	1.429	0.000726655	0.0158284
cellular_component	GO:0045177	apical part of cell	115	15	2.534	0.000825427	0.0178389
cellular_component	GO:0030863	cortical cytoskeleton	31	7	4.387	0.000832326	0.0179178
cellular_component	GO:0045335	phagocytic vesicle	40	8	3.886	0.00084821	0.0181182
cellular_component	GO:0005885	Arp2/3 protein complex	10	4	7.772	0.00114205	0.0232244
cellular_component	GO:0046581	intercellular canaliculus	10	4	7.772	0.00114205	0.0232244
cellular_component	GO:0072559	NLRP3 inflammasome complex	5	3	11.657	0.0012577	0.0239833
cellular_component	GO:0001650	fibrillar center	121	15	2.409	0.0013967	0.0258389
cellular_component	GO:0031902	late endosome membrane	27	6	4.318	0.00213855	0.0359315
cellular_component	GO:0005884	actin filament	67	10	2.9	0.00214944	0.0360048
cellular_component	GO:0070937	CRD-mediated mRNA stability complex	6	3	9.715	0.00241903	0.0371192
cellular_component	GO:0034663	endoplasmic reticulum chaperone complex	12	4	6.476	0.00247797	0.0371192
cellular_component	GO:0000775	chromosome, centromeric region	141	16	2.205	0.00249218	0.0371192
cellular_component	GO:0035354	Toll-like receptor 1-Toll-like receptor 2 protein complex	2	2	19.429	0.00264704	0.0371192
cellular_component	GO:0035355	Toll-like receptor 2-Toll-like receptor 6 protein complex	2	2	19.429	0.00264704	0.0371192
cellular_component	GO:0071065	alpha9-beta1 integrin-vascular cell adhesion molecule-1 complex	2	2	19.429	0.00264704	0.0371192
cellular_component	GO:0016459	myosin complex	48	8	3.238	0.00289336	0.0402659
cellular_component	GO:0071944	cell periphery	70	10	2.776	0.00299296	0.0413389
cellular_component	GO:0015630	microtubule cytoskeleton	157	17	2.104	0.00305569	0.0420998
cellular_component	GO:0005793	endoplasmic reticulum-Golgi intermediate compartment	49	8	3.172	0.00330482	0.0450813
cellular_component	GO:0072686	mitotic spindle	49	8	3.172	0.00330482	0.0450813
cellular_component	GO:0042629	mast cell granule	7	3	8.327	0.00407156	0.0520612
cellular_component	GO:0005871	kinesin complex	51	8	3.048	0.00426271	0.0539244
cellular_component	GO:0010008	endosome membrane	62	9	2.82	0.0042662	0.0539244
cellular_component	GO:0097431	mitotic spindle pole	14	4	5.551	0.00461413	0.0561334
cellular_component	GO:0000779	condensed chromosome, centromeric region	8	3	7.286	0.00626629	0.070333
cellular_component	GO:0031209	SCAR complex	8	3	7.286	0.00626629	0.070333
cellular_component	GO:0043005	neuron projection	420	34	1.573	0.00634875	0.0711138
cellular_component	GO:0016324	apical plasma membrane	287	25	1.692	0.00739763	0.0743205
cellular_component	GO:0000221	vacuolar proton-transporting V-type ATPase, V1 domain	3	2	12.953	0.00766906	0.0743205
cellular_component	GO:0005944	phosphatidylinositol 3-kinase complex, class IB	3	2	12.953	0.00766906	0.0743205
cellular_component	GO:0031088	platelet dense granule membrane	3	2	12.953	0.00766906	0.0743205
cellular_component	GO:0034666	integrin alpha2-beta1 complex	3	2	12.953	0.00766906	0.0743205
cellular_component	GO:0072558	NLRP1 inflammasome complex	3	2	12.953	0.00766906	0.0743205
cellular_component	GO:0097149	centralspindlin complex	3	2	12.953	0.00766906	0.0743205
cellular_component	GO:0098636	protein complex involved in cell adhesion	3	2	12.953	0.00766906	0.0743205
cellular_component	GO:0030140	trans-Golgi network transport vesicle	16	4	4.857	0.00772739	0.0743205
cellular_component	GO:0005819	spindle	68	9	2.572	0.00788322	0.0755555
cellular_component	GO:0043025	neuronal cell body	538	41	1.481	0.008149	0.0771635
cellular_component	GO:0005788	endoplasmic reticulum lumen	46	7	2.957	0.00867102	0.0814072
cellular_component	GO:0005814	centriole	94	11	2.274	0.00887229	0.0819606
cellular_component	GO:0000776	kinetochore	120	13	2.105	0.00887872	0.0819606
cellular_component	GO:0042582	azurophil granule	9	3	6.476	0.00904229	0.0819606
cellular_component	GO:0043020	NADPH oxidase complex	9	3	6.476	0.00904229	0.0819606
cellular_component	GO:0044233	ER-mitochondrion membrane contact site	9	3	6.476	0.00904229	0.0819606
cellular_component	GO:0042571	immunoglobulin complex, circulating	134	14	2.03	0.0092374	0.0835916
cellular_component	GO:0031941	filamentous actin	36	6	3.238	0.00949371	0.0852608
cellular_component	GO:0019898	extrinsic component of membrane	70	9	2.498	0.00949921	0.0852608
cellular_component	GO:0030173	integral component of Golgi membrane	47	7	2.894	0.00974694	0.0862206
molecular_function	GO:0005515	protein binding	4545	367	1.569	4.45055e-21	3.06587e-18
molecular_function	GO:0016787	hydrolase activity	1513	149	1.913	8.68506e-15	4.35121e-12
molecular_function	GO:0008233	peptidase activity	509	62	2.367	2.89068e-10	8.26473e-08
molecular_function	GO:0005524	ATP binding	1371	121	1.715	3.59556e-09	7.33893e-07
molecular_function	GO:0000166	nucleotide binding	1862	149	1.555	3.52267e-08	5.24687e-06
molecular_function	GO:0017124	SH3 domain binding	121	23	3.693	4.95307e-08	7.18326e-06
molecular_function	GO:0005178	integrin binding	98	20	3.965	1.07614e-07	1.31791e-05
molecular_function	GO:0032403	protein complex binding	360	43	2.321	2.67191e-07	3.06768e-05
molecular_function	GO:0003779	actin binding	337	41	2.364	3.08275e-07	3.39781e-05
molecular_function	GO:0098641	cadherin binding involved in cell-cell adhesion	277	36	2.525	3.23515e-07	3.49586e-05
molecular_function	GO:0030246	carbohydrate binding	198	29	2.846	3.69844e-07	3.84568e-05
molecular_function	GO:0004896	cytokine receptor activity	40	12	5.829	4.78214e-07	4.70614e-05
molecular_function	GO:0004197	cysteine-type endopeptidase activity	56	14	4.857	6.46803e-07	6.04158e-05
molecular_function	GO:0008234	cysteine-type peptidase activity	134	21	3.045	4.9578e-06	0.000303582
molecular_function	GO:0016740	transferase activity	1482	115	1.508	6.25029e-06	0.000374406
molecular_function	GO:0005096	GTPase activator activity	234	29	2.408	1.11884e-05	0.000598633
molecular_function	GO:0043027	cysteine-type endopeptidase inhibitor activity involved in apoptotic process	30	9	5.829	1.31844e-05	0.000685466
molecular_function	GO:0046982	protein heterodimerization activity	517	50	1.879	1.49696e-05	0.000756856
molecular_function	GO:0001784	phosphotyrosine binding	18	7	7.556	1.81334e-05	0.000892259
molecular_function	GO:0005518	collagen binding	58	12	4.02	3.23518e-05	0.00149824
molecular_function	GO:0008237	metallopeptidase activity	153	21	2.667	3.93062e-05	0.001691
molecular_function	GO:0043236	laminin binding	27	8	5.757	4.44118e-05	0.00185419
molecular_function	GO:0019901	protein kinase binding	443	42	1.842	0.000109423	0.00395797
molecular_function	GO:0051015	actin filament binding	141	19	2.618	0.00011566	0.00413897
molecular_function	GO:0008009	chemokine activity	39	9	4.484	0.000128507	0.00451083
molecular_function	GO:0004715	non-membrane spanning protein tyrosine kinase activity	49	10	3.965	0.000164554	0.005366
molecular_function	GO:0001948	glycoprotein binding	79	13	3.197	0.000185296	0.00597174
molecular_function	GO:0016301	kinase activity	614	52	1.645	0.000312272	0.0093529
molecular_function	GO:0016757	transferase activity, transferring glycosyl groups	204	23	2.191	0.000357601	0.0104826
molecular_function	GO:0004553	hydrolase activity, hydrolyzing O-glycosyl compounds	36	8	4.318	0.000400619	0.0111756
molecular_function	GO:0016175	superoxide-generating NADPH oxidase activity	8	4	9.715	0.000413687	0.0111756
molecular_function	GO:0043394	proteoglycan binding	8	4	9.715	0.000413687	0.0111756
molecular_function	GO:0019767	IgE receptor activity	4	3	14.572	0.000523174	0.0129874
molecular_function	GO:0001968	fibronectin binding	29	7	4.69	0.00054056	0.0130443
molecular_function	GO:0016798	hydrolase activity, acting on glycosyl bonds	77	12	3.028	0.000542031	0.0130443
molecular_function	GO:0046872	metal ion binding	2937	189	1.25	0.000606598	0.0142862
molecular_function	GO:0005031	tumor necrosis factor-activated receptor activity	22	6	5.299	0.000671983	0.0154133
molecular_function	GO:1990841	promoter-specific chromatin binding	22	6	5.299	0.000671983	0.0154133
molecular_function	GO:0015171	amino acid transmembrane transporter activity	30	7	4.533	0.000674033	0.0154133
molecular_function	GO:0030676	Rac guanyl-nucleotide exchange factor activity	15	5	6.476	0.00069732	0.0156208
molecular_function	GO:0004653	polypeptide N-acetylgalactosaminyltransferase activity	16	5	6.072	0.000971506	0.0201277
molecular_function	GO:0003823	antigen binding	170	19	2.171	0.00124302	0.0239833
molecular_function	GO:0019863	IgE binding	5	3	11.657	0.0012577	0.0239833
molecular_function	GO:0071723	lipopeptide binding	5	3	11.657	0.0012577	0.0239833
molecular_function	GO:0046703	natural killer cell lectin-like receptor binding	17	5	5.714	0.00131834	0.0247964
molecular_function	GO:0046961	proton-transporting ATPase activity, rotational mechanism	17	5	5.714	0.00131834	0.0247964
molecular_function	GO:0005509	calcium ion binding	595	48	1.567	0.00146456	0.0268145
molecular_function	GO:0051117	ATPase binding	86	12	2.711	0.0014761	0.0269365
molecular_function	GO:0034987	immunoglobulin receptor binding	136	16	2.286	0.00171673	0.0300274
molecular_function	GO:0051400	BH domain binding	11	4	7.065	0.00172177	0.0300274
molecular_function	GO:0004177	aminopeptidase activity	27	6	4.318	0.00213855	0.0359315
molecular_function	GO:0003756	protein disulfide isomerase activity	19	5	5.113	0.00227345	0.0371192
molecular_function	GO:0004563	beta-N-acetylhexosaminidase activity	6	3	9.715	0.00241903	0.0371192
molecular_function	GO:0004908	interleukin-1 receptor activity	6	3	9.715	0.00241903	0.0371192
molecular_function	GO:0008559	xenobiotic-transporting ATPase activity	6	3	9.715	0.00241903	0.0371192
molecular_function	GO:0070891	lipoteichoic acid binding	6	3	9.715	0.00241903	0.0371192
molecular_function	GO:0097153	cysteine-type endopeptidase activity involved in apoptotic process	6	3	9.715	0.00241903	0.0371192
molecular_function	GO:0005085	guanyl-nucleotide exchange factor activity	154	17	2.145	0.00249527	0.0371192
molecular_function	GO:0001605	adrenomedullin receptor activity	2	2	19.429	0.00264704	0.0371192
molecular_function	GO:0003977	UDP-N-acetylglucosamine diphosphorylase activity	2	2	19.429	0.00264704	0.0371192
molecular_function	GO:0005415	nucleoside:sodium symporter activity	2	2	19.429	0.00264704	0.0371192
molecular_function	GO:0015211	purine nucleoside transmembrane transporter activity	2	2	19.429	0.00264704	0.0371192
molecular_function	GO:0035717	chemokine (C-C motif) ligand 7 binding	2	2	19.429	0.00264704	0.0371192
molecular_function	GO:0038064	collagen receptor activity	2	2	19.429	0.00264704	0.0371192
molecular_function	GO:0042497	triacyl lipopeptide binding	2	2	19.429	0.00264704	0.0371192
molecular_function	GO:0042498	diacyl lipopeptide binding	2	2	19.429	0.00264704	0.0371192
molecular_function	GO:0050135	NAD(P)+ nucleosidase activity	2	2	19.429	0.00264704	0.0371192
molecular_function	GO:0061809	NAD+ nucleotidase, cyclic ADP-ribose generating	2	2	19.429	0.00264704	0.0371192
molecular_function	GO:0071791	chemokine (C-C motif) ligand 5 binding	2	2	19.429	0.00264704	0.0371192
molecular_function	GO:0008289	lipid binding	252	24	1.85	0.00284598	0.0397068
molecular_function	GO:0008375	acetylglucosaminyltransferase activity	20	5	4.857	0.00290414	0.0403141
molecular_function	GO:0042277	peptide binding	94	12	2.48	0.00316757	0.0435323
molecular_function	GO:0001530	lipopolysaccharide binding	21	5	4.626	0.00365205	0.049209
molecular_function	GO:0004559	alpha-mannosidase activity	7	3	8.327	0.00407156	0.0520612
molecular_function	GO:0005138	interleukin-6 receptor binding	7	3	8.327	0.00407156	0.0520612
molecular_function	GO:0019209	kinase activator activity	7	3	8.327	0.00407156	0.0520612
molecular_function	GO:0019864	IgG binding	7	3	8.327	0.00407156	0.0520612
molecular_function	GO:0031730	CCR5 chemokine receptor binding	7	3	8.327	0.00407156	0.0520612
molecular_function	GO:0030971	receptor tyrosine kinase binding	51	8	3.048	0.00426271	0.0539244
molecular_function	GO:0016853	isomerase activity	110	13	2.296	0.0042958	0.0541743
molecular_function	GO:0043325	phosphatidylinositol-3,4-bisphosphate binding	22	5	4.416	0.00452854	0.0561334
molecular_function	GO:0048365	Rac GTPase binding	41	7	3.317	0.00454825	0.0561334
molecular_function	GO:0005516	calmodulin binding	179	18	1.954	0.0051701	0.0624834
molecular_function	GO:0017075	syntaxin-1 binding	23	5	4.224	0.00554485	0.0657154
molecular_function	GO:0004843	thiol-dependent ubiquitin-specific protease activity	77	10	2.523	0.00599361	0.0697646
molecular_function	GO:0070006	metalloaminopeptidase activity	15	4	5.181	0.00603842	0.0697646
molecular_function	GO:0042803	protein homodimerization activity	787	57	1.407	0.00605455	0.0698046
molecular_function	GO:0004252	serine-type endopeptidase activity	182	18	1.922	0.00613292	0.070333
molecular_function	GO:0034046	poly(G) binding	8	3	7.286	0.00626629	0.070333
molecular_function	GO:0042802	identical protein binding	791	57	1.4	0.00669944	0.0742766
molecular_function	GO:0004869	cysteine-type endopeptidase inhibitor activity	24	5	4.048	0.00671198	0.0742766
molecular_function	GO:0016831	carboxy-lyase activity	24	5	4.048	0.00671198	0.0742766
molecular_function	GO:0004872	receptor activity	170	17	1.943	0.00682091	0.0743205
molecular_function	GO:0050839	cell adhesion molecule binding	67	9	2.61	0.00715831	0.0743205
molecular_function	GO:0003953	NAD+ nucleosidase activity	3	2	12.953	0.00766906	0.0743205
molecular_function	GO:0004117	calmodulin-dependent cyclic-nucleotide phosphodiesterase activity	3	2	12.953	0.00766906	0.0743205
molecular_function	GO:0016505	peptidase activator activity involved in apoptotic process	3	2	12.953	0.00766906	0.0743205
molecular_function	GO:0019153	protein-disulfide reductase (glutathione) activity	3	2	12.953	0.00766906	0.0743205
molecular_function	GO:0019776	Atg8 ligase activity	3	2	12.953	0.00766906	0.0743205
molecular_function	GO:0019865	immunoglobulin binding	3	2	12.953	0.00766906	0.0743205
molecular_function	GO:0019976	interleukin-2 binding	3	2	12.953	0.00766906	0.0743205
molecular_function	GO:0034594	phosphatidylinositol trisphosphate phosphatase activity	3	2	12.953	0.00766906	0.0743205
molecular_function	GO:0034988	Fc-gamma receptor I complex binding	3	2	12.953	0.00766906	0.0743205
molecular_function	GO:0035663	Toll-like receptor 2 binding	3	2	12.953	0.00766906	0.0743205
molecular_function	GO:0038023	signaling receptor activity	3	2	12.953	0.00766906	0.0743205
molecular_function	GO:0048101	calcium- and calmodulin-regulated 3',5'-cyclic-GMP phosphodiesterase activity	3	2	12.953	0.00766906	0.0743205
molecular_function	GO:0070569	uridylyltransferase activity	3	2	12.953	0.00766906	0.0743205
molecular_function	GO:0097001	ceramide binding	3	2	12.953	0.00766906	0.0743205
molecular_function	GO:0042288	MHC class I protein binding	16	4	4.857	0.00772739	0.0743205
molecular_function	GO:0004190	aspartic-type endopeptidase activity	25	5	3.886	0.00804068	0.0762688
molecular_function	GO:0005125	cytokine activity	203	19	1.818	0.00882695	0.0819606
molecular_function	GO:0001618	virus receptor activity	17	4	4.572	0.00969941	0.0860764
molecular_function	GO:0004435	phosphatidylinositol phospholipase C activity	17	4	4.572	0.00969941	0.0860764
molecular_function	GO:0017127	cholesterol transporter activity	17	4	4.572	0.00969941	0.0860764

## Sheet: Down CIH8W vs Nor8W
Catergory	GO_ID	GO_Name	Population_mapped_id	Study_mapped_id	Enrichment	P_value	FDR
biological_process	GO:0008152	metabolic process	439	33	2.393	3.99618e-06	0.00166976
biological_process	GO:0030178	negative regulation of Wnt signaling pathway	54	9	5.306	4.25576e-05	0.00840262
biological_process	GO:0018916	nitrobenzene metabolic process	4	3	23.876	0.000120604	0.0193837
biological_process	GO:0006749	glutathione metabolic process	39	7	5.714	0.000187819	0.0246982
biological_process	GO:0006694	steroid biosynthetic process	58	8	4.391	0.000436932	0.0436731
biological_process	GO:0021696	cerebellar cortex morphogenesis	6	3	15.918	0.000575112	0.05546
biological_process	GO:0045214	sarcomere organization	37	6	5.162	0.000953096	0.0730998
biological_process	GO:0042178	xenobiotic catabolic process	7	3	13.644	0.000982939	0.0730998
biological_process	GO:0007418	ventral midline development	2	2	31.835	0.000985445	0.0730998
biological_process	GO:0031630	regulation of synaptic vesicle fusion to presynaptic membrane	2	2	31.835	0.000985445	0.0730998
biological_process	GO:0060032	notochord regression	2	2	31.835	0.000985445	0.0730998
biological_process	GO:0016126	sterol biosynthetic process	26	5	6.122	0.00114681	0.08092
biological_process	GO:0018095	protein polyglutamylation	8	3	11.938	0.00153603	0.103342
biological_process	GO:0097151	positive regulation of inhibitory postsynaptic potential	8	3	11.938	0.00153603	0.103342
biological_process	GO:0043113	receptor clustering	28	5	5.685	0.00162689	0.106592
biological_process	GO:0035418	protein localization to synapse	17	4	7.491	0.00165802	0.106592
biological_process	GO:0006695	cholesterol biosynthetic process	29	5	5.489	0.0019156	0.117911
biological_process	GO:2000463	positive regulation of excitatory postsynaptic potential	29	5	5.489	0.0019156	0.117911
biological_process	GO:2000311	regulation of AMPA receptor activity	18	4	7.074	0.00207918	0.123148
biological_process	GO:0030239	myofibril assembly	9	3	10.612	0.0022504	0.123148
biological_process	GO:0086036	regulation of cardiac muscle cell membrane potential	9	3	10.612	0.0022504	0.123148
biological_process	GO:0006629	lipid metabolic process	454	26	1.823	0.00257025	0.123148
biological_process	GO:0045777	positive regulation of blood pressure	31	5	5.135	0.00260272	0.123148
biological_process	GO:0071277	cellular response to calcium ion	45	6	4.245	0.00270082	0.123148
biological_process	GO:0016055	Wnt signaling pathway	211	15	2.263	0.00285857	0.123148
biological_process	GO:0021965	spinal cord ventral commissure morphogenesis	3	2	21.223	0.00289458	0.123148
biological_process	GO:0061621	canonical glycolysis	3	2	21.223	0.00289458	0.123148
biological_process	GO:0070458	cellular detoxification of nitrogen compound	3	2	21.223	0.00289458	0.123148
biological_process	GO:2000544	regulation of endothelial cell chemotaxis to fibroblast growth factor	3	2	21.223	0.00289458	0.123148
biological_process	GO:0006874	cellular calcium ion homeostasis	95	9	3.016	0.00301016	0.124405
biological_process	GO:0005980	glycogen catabolic process	10	3	9.551	0.00314012	0.126172
biological_process	GO:0030198	extracellular matrix organization	98	9	2.924	0.00371168	0.147095
biological_process	GO:0007275	multicellular organism development	1024	48	1.492	0.00392298	0.153367
biological_process	GO:0060079	excitatory postsynaptic potential	36	5	4.422	0.00507678	0.188496
biological_process	GO:0019933	cAMP-mediated signaling	23	4	5.537	0.00531303	0.188496
biological_process	GO:0007264	small GTPase mediated signal transduction	226	15	2.113	0.00540424	0.188496
biological_process	GO:0010454	negative regulation of cell fate commitment	4	2	15.918	0.00566856	0.188496
biological_process	GO:0021938	smoothened signaling pathway involved in regulation of cerebellar granule cell precursor cell proliferation	4	2	15.918	0.00566856	0.188496
biological_process	GO:0060073	micturition	4	2	15.918	0.00566856	0.188496
biological_process	GO:0061669	spontaneous neurotransmitter secretion	4	2	15.918	0.00566856	0.188496
biological_process	GO:1903278	positive regulation of sodium ion export from cell	4	2	15.918	0.00566856	0.188496
biological_process	GO:0051965	positive regulation of synapse assembly	70	7	3.184	0.00633747	0.208344
biological_process	GO:0006123	mitochondrial electron transport, cytochrome c to oxygen	13	3	7.347	0.00697575	0.216884
biological_process	GO:0007288	sperm axoneme assembly	13	3	7.347	0.00697575	0.216884
biological_process	GO:0007269	neurotransmitter secretion	26	4	4.898	0.00832793	0.216884
biological_process	GO:0017157	regulation of exocytosis	26	4	4.898	0.00832793	0.216884
biological_process	GO:0007219	Notch signaling pathway	111	9	2.581	0.00834038	0.216884
biological_process	GO:0033564	anterior/posterior axon guidance	5	2	12.734	0.00925131	0.216884
biological_process	GO:0033605	positive regulation of catecholamine secretion	5	2	12.734	0.00925131	0.216884
biological_process	GO:0046879	hormone secretion	5	2	12.734	0.00925131	0.216884
biological_process	GO:0046959	habituation	5	2	12.734	0.00925131	0.216884
biological_process	GO:0051081	nuclear envelope disassembly	5	2	12.734	0.00925131	0.216884
biological_process	GO:0060316	positive regulation of ryanodine-sensitive calcium-release channel activity	5	2	12.734	0.00925131	0.216884
biological_process	GO:0061615	glycolytic process through fructose-6-phosphate	5	2	12.734	0.00925131	0.216884
biological_process	GO:2000809	positive regulation of synaptic vesicle clustering	5	2	12.734	0.00925131	0.216884
biological_process	GO:0050806	positive regulation of synaptic transmission	27	4	4.716	0.00953776	0.216884
cellular_component	GO:0005886	plasma membrane	3692	167	1.44	3.90892e-07	0.000282713
cellular_component	GO:0005737	cytoplasm	5599	231	1.313	1.7566e-06	0.00101637
cellular_component	GO:0016020	membrane	6929	274	1.259	4.04022e-06	0.00166976
cellular_component	GO:0005578	proteinaceous extracellular matrix	307	26	2.696	5.16567e-06	0.00186804
cellular_component	GO:0045202	synapse	505	35	2.206	1.21406e-05	0.00390252
cellular_component	GO:0030054	cell junction	723	44	1.937	2.53041e-05	0.00632818
cellular_component	GO:0030425	dendrite	418	30	2.285	2.6249e-05	0.00632818
cellular_component	GO:0005856	cytoskeleton	1115	60	1.713	3.68953e-05	0.00821063
cellular_component	GO:0014069	postsynaptic density	212	19	2.853	4.3567e-05	0.00840262
cellular_component	GO:0030018	Z disc	116	13	3.568	7.35183e-05	0.013293
cellular_component	GO:0005614	interstitial matrix	17	5	9.363	0.000136359	0.0207625
cellular_component	GO:0060076	excitatory synapse	38	7	5.864	0.000158362	0.0229071
cellular_component	GO:0008021	synaptic vesicle	126	13	3.285	0.000171319	0.0236012
cellular_component	GO:0005576	extracellular region	1634	77	1.5	0.000241765	0.0304098
cellular_component	GO:0045211	postsynaptic membrane	223	18	2.57	0.000256858	0.0309621
cellular_component	GO:0008328	ionotropic glutamate receptor complex	12	4	10.612	0.000390846	0.0436731
cellular_component	GO:0016529	sarcoplasmic reticulum	58	8	4.391	0.000436932	0.0436731
cellular_component	GO:0030315	T-tubule	58	8	4.391	0.000436932	0.0436731
cellular_component	GO:0005874	microtubule	315	22	2.223	0.000437788	0.0436731
cellular_component	GO:0014802	terminal cisterna	2	2	31.835	0.000985445	0.0730998
cellular_component	GO:0031594	neuromuscular junction	66	8	3.859	0.00105096	0.0760104
cellular_component	GO:0030017	sarcomere	30	5	5.306	0.00224005	0.123148
cellular_component	GO:0032281	AMPA glutamate receptor complex	30	5	5.306	0.00224005	0.123148
cellular_component	GO:0042383	sarcolemma	109	10	2.921	0.00229531	0.123148
cellular_component	GO:0005945	6-phosphofructokinase complex	3	2	21.223	0.00289458	0.123148
cellular_component	GO:0016461	unconventional myosin complex	3	2	21.223	0.00289458	0.123148
cellular_component	GO:0097057	TRAF2-GSTP1 complex	3	2	21.223	0.00289458	0.123148
cellular_component	GO:0016011	dystroglycan complex	5	2	12.734	0.00925131	0.216884
cellular_component	GO:0043227	membrane-bounded organelle	5	2	12.734	0.00925131	0.216884
cellular_component	GO:0043197	dendritic spine	134	10	2.376	0.00981655	0.216884
cellular_component	GO:0008076	voltage-gated potassium channel complex	76	7	2.932	0.00984531	0.216884
molecular_function	GO:0004364	glutathione transferase activity	25	10	12.734	1.88031e-09	5.43973e-06
molecular_function	GO:0043295	glutathione binding	14	7	15.918	8.31118e-08	0.000120221
molecular_function	GO:0005509	calcium ion binding	595	44	2.354	1.59649e-07	0.000153954
molecular_function	GO:0003824	catalytic activity	471	33	2.23	1.71976e-05	0.00497526
molecular_function	GO:0046872	metal ion binding	2937	127	1.377	0.000105423	0.0179406
molecular_function	GO:0005212	structural constituent of eye lens	24	5	6.632	0.000780496	0.0728379
molecular_function	GO:0035730	S-nitrosoglutathione binding	2	2	31.835	0.000985445	0.0730998
molecular_function	GO:0035731	dinitrosyl-iron complex binding	2	2	31.835	0.000985445	0.0730998
molecular_function	GO:0004602	glutathione peroxidase activity	19	4	6.702	0.00256878	0.123148
molecular_function	GO:0003872	6-phosphofructokinase activity	3	2	21.223	0.00289458	0.123148
molecular_function	GO:0008184	glycogen phosphorylase activity	3	2	21.223	0.00289458	0.123148
molecular_function	GO:0016866	intramolecular transferase activity	3	2	21.223	0.00289458	0.123148
molecular_function	GO:0017080	sodium channel regulator activity	32	5	4.974	0.0030061	0.124405
molecular_function	GO:0047555	3',5'-cyclic-GMP phosphodiesterase activity	10	3	9.551	0.00314012	0.126172
molecular_function	GO:0030159	receptor signaling complex scaffold activity	12	3	7.959	0.00549301	0.188496
molecular_function	GO:0031681	G-protein beta-subunit binding	12	3	7.959	0.00549301	0.188496
molecular_function	GO:0051117	ATPase binding	86	8	2.961	0.00562461	0.188496
molecular_function	GO:0004645	phosphorylase activity	4	2	15.918	0.00566856	0.188496
molecular_function	GO:0031821	G-protein coupled serotonin receptor binding	4	2	15.918	0.00566856	0.188496
molecular_function	GO:0008432	JUN kinase binding	13	3	7.347	0.00697575	0.216884
molecular_function	GO:0005216	ion channel activity	169	12	2.26	0.00727392	0.216884
molecular_function	GO:0070095	fructose-6-phosphate binding	5	2	12.734	0.00925131	0.216884
molecular_function	GO:0004129	cytochrome-c oxidase activity	27	4	4.716	0.00953776	0.216884
molecular_function	GO:0019894	kinesin binding	42	5	3.79	0.00982216	0.216884

## Sheet: Up CIH12W vs Nor12W
Catergory	GO_ID	GO_Name	Population_mapped_id	Study_mapped_id	Enrichment	P_value	FDR
biological_process	GO:0006351	transcription, DNA-templated	1838	235	2.143	3.28918e-30	6.06744e-27
biological_process	GO:0006355	regulation of transcription, DNA-templated	2039	250	2.055	2.27534e-29	3.14794e-26
biological_process	GO:0045944	positive regulation of transcription from RNA polymerase II promoter	996	136	2.288	5.67452e-20	2.8548e-17
biological_process	GO:0016569	covalent chromatin modification	264	50	3.174	2.87416e-13	1.22351e-10
biological_process	GO:0030036	actin cytoskeleton organization	142	35	4.13	3.9806e-13	1.57347e-10
biological_process	GO:0006397	mRNA processing	313	54	2.891	1.62035e-12	5.27473e-10
biological_process	GO:0000122	negative regulation of transcription from RNA polymerase II promoter	721	88	2.045	1.25915e-10	2.40281e-08
biological_process	GO:0045893	positive regulation of transcription, DNA-templated	569	72	2.12	1.32659e-09	2.29418e-07
biological_process	GO:0098609	cell-cell adhesion	185	34	3.08	4.02209e-09	6.54655e-07
biological_process	GO:0007179	transforming growth factor beta receptor signaling pathway	70	19	4.549	1.66663e-08	2.31763e-06
biological_process	GO:0045892	negative regulation of transcription, DNA-templated	481	61	2.125	2.22978e-08	3.00966e-06
biological_process	GO:0035556	intracellular signal transduction	405	54	2.234	2.64597e-08	3.48638e-06
biological_process	GO:0015031	protein transport	579	67	1.939	1.62541e-07	1.95544e-05
biological_process	GO:0006357	regulation of transcription from RNA polymerase II promoter	369	48	2.18	3.26868e-07	3.54683e-05
biological_process	GO:0006986	response to unfolded protein	49	14	4.788	6.38791e-07	6.66995e-05
biological_process	GO:0030335	positive regulation of cell migration	186	29	2.613	1.96035e-06	0.000174977
biological_process	GO:0007507	heart development	230	33	2.404	2.64882e-06	0.000232676
biological_process	GO:0030512	negative regulation of transforming growth factor beta receptor signaling pathway	55	14	4.266	2.93954e-06	0.000254179
biological_process	GO:0008285	negative regulation of cell proliferation	368	45	2.049	4.07488e-06	0.000336573
biological_process	GO:0048568	embryonic organ development	36	11	5.12	4.93626e-06	0.000396634
biological_process	GO:0008284	positive regulation of cell proliferation	470	53	1.89	6.66064e-06	0.000504931
biological_process	GO:0010628	positive regulation of gene expression	388	46	1.987	7.30872e-06	0.000546574
biological_process	GO:0007219	Notch signaling pathway	111	20	3.019	8.35725e-06	0.00060854
biological_process	GO:0048661	positive regulation of smooth muscle cell proliferation	77	16	3.482	1.0195e-05	0.000723321
biological_process	GO:0006457	protein folding	113	20	2.966	1.10302e-05	0.000772675
biological_process	GO:0010667	negative regulation of cardiac muscle cell apoptotic process	26	9	5.801	1.15717e-05	0.000797155
biological_process	GO:0043967	histone H4 acetylation	33	10	5.078	1.44885e-05	0.000954516
biological_process	GO:0043393	regulation of protein binding	21	8	6.384	1.59263e-05	0.00103689
biological_process	GO:0006396	RNA processing	72	15	3.491	1.85299e-05	0.00117867
biological_process	GO:0043968	histone H2A acetylation	16	7	7.331	1.88398e-05	0.00118476
biological_process	GO:0051028	mRNA transport	82	16	3.27	2.34775e-05	0.00141413
biological_process	GO:0048146	positive regulation of fibroblast proliferation	65	14	3.609	2.35091e-05	0.00141413
biological_process	GO:0048738	cardiac muscle tissue development	29	9	5.201	3.15162e-05	0.00181678
biological_process	GO:0007155	cell adhesion	510	54	1.774	3.25564e-05	0.00183844
biological_process	GO:0007010	cytoskeleton organization	103	18	2.929	3.56565e-05	0.00193454
biological_process	GO:0008380	RNA splicing	238	31	2.183	3.69481e-05	0.00196606
biological_process	GO:0032956	regulation of actin cytoskeleton organization	52	12	3.867	4.32183e-05	0.00227781
biological_process	GO:0006468	protein phosphorylation	555	57	1.721	4.70865e-05	0.00245827
biological_process	GO:0030968	endoplasmic reticulum unfolded protein response	45	11	4.096	5.07661e-05	0.0026256
biological_process	GO:0001701	in utero embryonic development	288	35	2.037	5.23443e-05	0.00268036
biological_process	GO:0007519	skeletal muscle tissue development	53	12	3.794	5.28583e-05	0.00268036
biological_process	GO:0035914	skeletal muscle cell differentiation	54	12	3.724	6.43017e-05	0.00314907
biological_process	GO:0035023	regulation of Rho protein signal transduction	71	14	3.304	6.63407e-05	0.00319243
biological_process	GO:0072358	cardiovascular system development	19	7	6.174	7.08039e-05	0.00334896
biological_process	GO:0001932	regulation of protein phosphorylation	63	13	3.458	7.32863e-05	0.003437
biological_process	GO:0016573	histone acetylation	26	8	5.156	9.35176e-05	0.00424202
biological_process	GO:0010718	positive regulation of epithelial to mesenchymal transition	33	9	4.57	9.77271e-05	0.00439693
biological_process	GO:0007229	integrin-mediated signaling pathway	66	13	3.301	0.000121177	0.005239
biological_process	GO:0034976	response to endoplasmic reticulum stress	67	13	3.251	0.000142229	0.00610153
biological_process	GO:0021612	facial nerve structural organization	10	5	8.379	0.000147041	0.00621166
biological_process	GO:0097435	supramolecular fiber organization	10	5	8.379	0.000147041	0.00621166
biological_process	GO:0007030	Golgi organization	77	14	3.047	0.000165639	0.0068028
biological_process	GO:0000184	nuclear-transcribed mRNA catabolic process, nonsense-mediated decay	28	8	4.788	0.000167181	0.0068028
biological_process	GO:0006378	mRNA polyadenylation	28	8	4.788	0.000167181	0.0068028
biological_process	GO:0051091	positive regulation of sequence-specific DNA binding transcription factor activity	107	17	2.662	0.000196046	0.00780517
biological_process	GO:0035329	hippo signaling	22	7	5.332	0.000204572	0.00798421
biological_process	GO:0090292	nuclear matrix anchoring at nuclear membrane	3	3	16.758	0.000212085	0.00798421
biological_process	GO:1905323	telomerase holoenzyme complex assembly	3	3	16.758	0.000212085	0.00798421
biological_process	GO:2000721	positive regulation of transcription from RNA polymerase II promoter involved in smooth muscle cell differentiation	3	3	16.758	0.000212085	0.00798421
biological_process	GO:0006366	transcription from RNA polymerase II promoter	129	19	2.468	0.000235398	0.00868462
biological_process	GO:0060317	cardiac epithelial to mesenchymal transition	11	5	7.617	0.000256313	0.00927084
biological_process	GO:0006612	protein targeting to membrane	23	7	5.1	0.000278992	0.00989708
biological_process	GO:0060828	regulation of canonical Wnt signaling pathway	23	7	5.1	0.000278992	0.00989708
biological_process	GO:0006417	regulation of translation	121	18	2.493	0.000299848	0.0105692
biological_process	GO:0001822	kidney development	111	17	2.566	0.000307451	0.0107686
biological_process	GO:0035278	miRNA mediated inhibition of translation	17	6	5.914	0.000312364	0.010772
biological_process	GO:0030199	collagen fibril organization	38	9	3.969	0.000315336	0.010772
biological_process	GO:0007275	multicellular organism development	1024	88	1.44	0.000362242	0.0121494
biological_process	GO:0035019	somatic stem cell population maintenance	47	10	3.565	0.00037757	0.0122202
biological_process	GO:0001666	response to hypoxia	113	17	2.521	0.000381301	0.0122202
biological_process	GO:0035280	miRNA loading onto RISC involved in gene silencing by miRNA	7	4	9.576	0.00038202	0.0122202
biological_process	GO:0035357	peroxisome proliferator activated receptor signaling pathway	7	4	9.576	0.00038202	0.0122202
biological_process	GO:0048702	embryonic neurocranium morphogenesis	7	4	9.576	0.00038202	0.0122202
biological_process	GO:0061052	negative regulation of cell growth involved in cardiac muscle cell development	7	4	9.576	0.00038202	0.0122202
biological_process	GO:1904706	negative regulation of vascular smooth muscle cell proliferation	7	4	9.576	0.00038202	0.0122202
biological_process	GO:0060325	face morphogenesis	39	9	3.867	0.000388434	0.012354
biological_process	GO:0003007	heart morphogenesis	65	12	3.094	0.000411455	0.0129375
biological_process	GO:0021675	nerve development	12	5	6.982	0.000417811	0.0130631
biological_process	GO:0007015	actin filament organization	84	14	2.793	0.000423908	0.0131792
biological_process	GO:0042127	regulation of cell proliferation	225	27	2.011	0.000437614	0.0135294
biological_process	GO:0042325	regulation of phosphorylation	18	6	5.586	0.000444973	0.0136805
biological_process	GO:0006470	protein dephosphorylation	136	19	2.341	0.000466468	0.0142128
biological_process	GO:0007264	small GTPase mediated signal transduction	226	27	2.002	0.000469357	0.0142128
biological_process	GO:0001933	negative regulation of protein phosphorylation	85	14	2.76	0.000480065	0.0144385
biological_process	GO:0000902	cell morphogenesis	76	13	2.866	0.000520008	0.0155553
biological_process	GO:0002062	chondrocyte differentiation	41	9	3.679	0.000576637	0.016974
biological_process	GO:0016180	snRNA processing	13	5	6.445	0.000645644	0.0182295
biological_process	GO:1900025	negative regulation of substrate adhesion-dependent cell spreading	13	5	6.445	0.000645644	0.0182295
biological_process	GO:0051726	regulation of cell cycle	108	16	2.483	0.000665093	0.0186834
biological_process	GO:0007420	brain development	140	19	2.274	0.000671702	0.0186932
biological_process	GO:0045444	fat cell differentiation	78	13	2.793	0.0006722	0.0186932
biological_process	GO:0001843	neural tube closure	98	15	2.565	0.000683853	0.0188281
biological_process	GO:0030198	extracellular matrix organization	98	15	2.565	0.000683853	0.0188281
biological_process	GO:0006473	protein acetylation	8	4	8.379	0.000727886	0.019554
biological_process	GO:0034975	protein folding in endoplasmic reticulum	8	4	8.379	0.000727886	0.019554
biological_process	GO:0042754	negative regulation of circadian rhythm	8	4	8.379	0.000727886	0.019554
biological_process	GO:0051131	chaperone-mediated protein complex assembly	8	4	8.379	0.000727886	0.019554
biological_process	GO:0061299	retina vasculature morphogenesis in camera-type eye	8	4	8.379	0.000727886	0.019554
biological_process	GO:0032922	circadian regulation of gene expression	60	11	3.072	0.000753164	0.0201353
biological_process	GO:0018105	peptidyl-serine phosphorylation	153	20	2.191	0.000797266	0.0207614
biological_process	GO:0006987	activation of signaling protein activity involved in unfolded protein response	4	3	12.568	0.000810447	0.0207614
biological_process	GO:0021569	rhombomere 3 development	4	3	12.568	0.000810447	0.0207614
biological_process	GO:0034088	maintenance of mitotic sister chromatid cohesion	4	3	12.568	0.000810447	0.0207614
biological_process	GO:0071902	positive regulation of protein serine/threonine kinase activity	27	7	4.345	0.000819147	0.0207943
biological_process	GO:0061077	chaperone-mediated protein folding	43	9	3.507	0.000833585	0.020892
biological_process	GO:0070555	response to interleukin-1	20	6	5.027	0.000838098	0.020892
biological_process	GO:0008360	regulation of cell shape	132	18	2.285	0.000868392	0.0212539
biological_process	GO:0006606	protein import into nucleus	61	11	3.022	0.000870055	0.0212539
biological_process	GO:0048008	platelet-derived growth factor receptor signaling pathway	35	8	3.83	0.00087192	0.0212539
biological_process	GO:0060348	bone development	52	10	3.223	0.000879498	0.0212539
biological_process	GO:0001568	blood vessel development	71	12	2.832	0.00094044	0.0226278
biological_process	GO:0033160	positive regulation of protein import into nucleus, translocation	14	5	5.985	0.000955155	0.0226528
biological_process	GO:0051571	positive regulation of histone H3-K4 methylation	14	5	5.985	0.000955155	0.0226528
biological_process	GO:1900153	positive regulation of nuclear-transcribed mRNA catabolic process, deadenylation-dependent decay	14	5	5.985	0.000955155	0.0226528
biological_process	GO:0007399	nervous system development	399	40	1.68	0.000957852	0.0226528
biological_process	GO:0031047	gene silencing by RNA	53	10	3.162	0.0010269	0.0238001
biological_process	GO:0048565	digestive tract development	28	7	4.189	0.00103647	0.0238001
biological_process	GO:0045454	cell redox homeostasis	63	11	2.926	0.00114906	0.026061
biological_process	GO:0007184	SMAD protein import into nucleus	9	4	7.448	0.00124833	0.027744
biological_process	GO:0042026	protein refolding	9	4	7.448	0.00124833	0.027744
biological_process	GO:0045616	regulation of keratinocyte differentiation	9	4	7.448	0.00124833	0.027744
biological_process	GO:0055007	cardiac muscle cell differentiation	37	8	3.623	0.00128628	0.0284731
biological_process	GO:0000956	nuclear-transcribed mRNA catabolic process	15	5	5.586	0.00136269	0.0294575
biological_process	GO:0043981	histone H4-K5 acetylation	15	5	5.586	0.00136269	0.0294575
biological_process	GO:0043982	histone H4-K8 acetylation	15	5	5.586	0.00136269	0.0294575
biological_process	GO:0008589	regulation of smoothened signaling pathway	22	6	4.57	0.00145576	0.0308666
biological_process	GO:0030866	cortical actin cytoskeleton organization	22	6	4.57	0.00145576	0.0308666
biological_process	GO:0071480	cellular response to gamma radiation	22	6	4.57	0.00145576	0.0308666
biological_process	GO:0050890	cognition	38	8	3.528	0.0015452	0.0322684
biological_process	GO:0031122	cytoplasmic microtubule organization	39	8	3.437	0.00184372	0.0377894
biological_process	GO:0045862	positive regulation of proteolysis	23	6	4.372	0.00187109	0.037856
biological_process	GO:0018107	peptidyl-threonine phosphorylation	67	11	2.751	0.00192875	0.037856
biological_process	GO:0007044	cell-substrate junction assembly	5	3	10.055	0.00193589	0.037856
biological_process	GO:0021637	trigeminal nerve structural organization	5	3	10.055	0.00193589	0.037856
biological_process	GO:0048713	regulation of oligodendrocyte differentiation	5	3	10.055	0.00193589	0.037856
biological_process	GO:0051271	negative regulation of cellular component movement	5	3	10.055	0.00193589	0.037856
biological_process	GO:0061156	pulmonary artery morphogenesis	5	3	10.055	0.00193589	0.037856
biological_process	GO:1902287	semaphorin-plexin signaling pathway involved in axon guidance	5	3	10.055	0.00193589	0.037856
biological_process	GO:0000186	activation of MAPKK activity	31	7	3.784	0.00196783	0.0379629
biological_process	GO:0035196	production of miRNAs involved in gene silencing by miRNA	10	4	6.703	0.00198252	0.0379629
biological_process	GO:0035721	intraciliary retrograde transport	10	4	6.703	0.00198252	0.0379629
biological_process	GO:0043254	regulation of protein complex assembly	10	4	6.703	0.00198252	0.0379629
biological_process	GO:0048703	embryonic viscerocranium morphogenesis	10	4	6.703	0.00198252	0.0379629
biological_process	GO:0051292	nuclear pore complex assembly	10	4	6.703	0.00198252	0.0379629
biological_process	GO:0016337	single organismal cell-cell adhesion	98	14	2.394	0.00200606	0.0382811
biological_process	GO:0016311	dephosphorylation	109	15	2.306	0.00206198	0.039213
biological_process	GO:0060548	negative regulation of cell death	78	12	2.578	0.00217419	0.0411689
biological_process	GO:0016567	protein ubiquitination	238	26	1.831	0.00217971	0.0411689
biological_process	GO:0045600	positive regulation of fat cell differentiation	49	9	3.078	0.00220202	0.041449
biological_process	GO:0046777	protein autophosphorylation	178	21	1.977	0.00221886	0.0416243
biological_process	GO:0030511	positive regulation of transforming growth factor beta receptor signaling pathway	24	6	4.189	0.00237022	0.0440161
biological_process	GO:0043488	regulation of mRNA stability	24	6	4.189	0.00237022	0.0440161
biological_process	GO:1900026	positive regulation of substrate adhesion-dependent cell spreading	32	7	3.666	0.00239085	0.0441032
biological_process	GO:0016310	phosphorylation	609	54	1.486	0.00243061	0.0446876
biological_process	GO:0006486	protein glycosylation	69	11	2.672	0.00245549	0.0449957
biological_process	GO:0051642	centrosome localization	17	5	4.929	0.00254076	0.0461001
biological_process	GO:0050680	negative regulation of epithelial cell proliferation	70	11	2.633	0.00275937	0.0497406
biological_process	GO:0016477	cell migration	194	22	1.9	0.00290542	0.0513439
biological_process	GO:0003184	pulmonary valve morphogenesis	11	4	6.094	0.00296893	0.0513439
biological_process	GO:0051272	positive regulation of cellular component movement	11	4	6.094	0.00296893	0.0513439
biological_process	GO:0060213	positive regulation of nuclear-transcribed mRNA poly(A) tail shortening	11	4	6.094	0.00296893	0.0513439
biological_process	GO:0072091	regulation of stem cell proliferation	11	4	6.094	0.00296893	0.0513439
biological_process	GO:0032092	positive regulation of protein binding	71	11	2.596	0.00309284	0.0531546
biological_process	GO:0007004	telomere maintenance via telomerase	18	5	4.655	0.00334683	0.0539217
biological_process	GO:1901224	positive regulation of NIK/NF-kappaB signaling	18	5	4.655	0.00334683	0.0539217
biological_process	GO:0006406	mRNA export from nucleus	34	7	3.45	0.00344342	0.0539217
biological_process	GO:0010811	positive regulation of cell-substrate adhesion	43	8	3.118	0.00351794	0.0539217
biological_process	GO:0048706	embryonic skeletal system development	43	8	3.118	0.00351794	0.0539217
biological_process	GO:0010611	regulation of cardiac muscle hypertrophy	2	2	16.758	0.00355869	0.0539217
biological_process	GO:0014809	regulation of skeletal muscle contraction by regulation of release of sequestered calcium ion	2	2	16.758	0.00355869	0.0539217
biological_process	GO:0016246	RNA interference	2	2	16.758	0.00355869	0.0539217
biological_process	GO:0016577	histone demethylation	2	2	16.758	0.00355869	0.0539217
biological_process	GO:0019417	sulfur oxidation	2	2	16.758	0.00355869	0.0539217
biological_process	GO:0021997	neural plate axis specification	2	2	16.758	0.00355869	0.0539217
biological_process	GO:0031086	nuclear-transcribed mRNA catabolic process, deadenylation-independent decay	2	2	16.758	0.00355869	0.0539217
biological_process	GO:0035507	regulation of myosin-light-chain-phosphatase activity	2	2	16.758	0.00355869	0.0539217
biological_process	GO:0048669	collateral sprouting in absence of injury	2	2	16.758	0.00355869	0.0539217
biological_process	GO:0050867	positive regulation of cell activation	2	2	16.758	0.00355869	0.0539217
biological_process	GO:0051563	smooth endoplasmic reticulum calcium ion homeostasis	2	2	16.758	0.00355869	0.0539217
biological_process	GO:0061162	establishment of monopolar cell polarity	2	2	16.758	0.00355869	0.0539217
biological_process	GO:0061188	negative regulation of chromatin silencing at rDNA	2	2	16.758	0.00355869	0.0539217
biological_process	GO:0071048	nuclear retention of unspliced pre-mRNA at the site of transcription	2	2	16.758	0.00355869	0.0539217
biological_process	GO:1902172	regulation of keratinocyte apoptotic process	2	2	16.758	0.00355869	0.0539217
biological_process	GO:1904582	positive regulation of intracellular mRNA localization	2	2	16.758	0.00355869	0.0539217
biological_process	GO:1904591	positive regulation of protein import	2	2	16.758	0.00355869	0.0539217
biological_process	GO:1904684	negative regulation of metalloendopeptidase activity	2	2	16.758	0.00355869	0.0539217
biological_process	GO:1905075	positive regulation of occluding junction disassembly	2	2	16.758	0.00355869	0.0539217
biological_process	GO:2000588	positive regulation of platelet-derived growth factor receptor-beta signaling pathway	2	2	16.758	0.00355869	0.0539217
biological_process	GO:2000850	negative regulation of glucocorticoid secretion	2	2	16.758	0.00355869	0.0539217
biological_process	GO:0007163	establishment or maintenance of cell polarity	26	6	3.867	0.00366033	0.0539217
biological_process	GO:1903146	regulation of mitophagy	26	6	3.867	0.00366033	0.0539217
biological_process	GO:0060021	palate development	83	12	2.423	0.00369014	0.0539217
biological_process	GO:0030522	intracellular receptor signaling pathway	6	3	8.379	0.00369991	0.0539217
biological_process	GO:0030865	cortical cytoskeleton organization	6	3	8.379	0.00369991	0.0539217
biological_process	GO:0043353	enucleate erythrocyte differentiation	6	3	8.379	0.00369991	0.0539217
biological_process	GO:0051168	nuclear export	6	3	8.379	0.00369991	0.0539217
biological_process	GO:0065004	protein-DNA complex assembly	6	3	8.379	0.00369991	0.0539217
biological_process	GO:0071557	histone H3-K27 demethylation	6	3	8.379	0.00369991	0.0539217
biological_process	GO:0072126	positive regulation of glomerular mesangial cell proliferation	6	3	8.379	0.00369991	0.0539217
biological_process	GO:1903363	negative regulation of cellular protein catabolic process	6	3	8.379	0.00369991	0.0539217
biological_process	GO:0048511	rhythmic process	127	16	2.111	0.00370261	0.0539217
biological_process	GO:0009887	animal organ morphogenesis	105	14	2.234	0.00383424	0.0556921
biological_process	GO:0016055	Wnt signaling pathway	211	23	1.827	0.00389797	0.0563221
biological_process	GO:0007517	muscle organ development	63	10	2.66	0.00392465	0.0565599
biological_process	GO:0007266	Rho protein signal transduction	44	8	3.047	0.004079	0.0579836
biological_process	GO:0051496	positive regulation of stress fiber assembly	44	8	3.047	0.004079	0.0579836
biological_process	GO:0007528	neuromuscular junction development	35	7	3.352	0.0040863	0.0579836
biological_process	GO:0070059	intrinsic apoptotic signaling pathway in response to endoplasmic reticulum stress	35	7	3.352	0.0040863	0.0579836
biological_process	GO:0000289	nuclear-transcribed mRNA poly(A) tail shortening	12	4	5.586	0.00424448	0.0587224
biological_process	GO:0006379	mRNA cleavage	12	4	5.586	0.00424448	0.0587224
biological_process	GO:0010761	fibroblast migration	12	4	5.586	0.00424448	0.0587224
biological_process	GO:0031054	pre-miRNA processing	12	4	5.586	0.00424448	0.0587224
biological_process	GO:0033148	positive regulation of intracellular estrogen receptor signaling pathway	12	4	5.586	0.00424448	0.0587224
biological_process	GO:0033169	histone H3-K9 demethylation	12	4	5.586	0.00424448	0.0587224
biological_process	GO:0045945	positive regulation of transcription from RNA polymerase III promoter	12	4	5.586	0.00424448	0.0587224
biological_process	GO:0009790	embryo development	74	11	2.491	0.00429135	0.0591964
biological_process	GO:0034113	heterotypic cell-cell adhesion	19	5	4.41	0.00432153	0.0591964
biological_process	GO:0090398	cellular senescence	19	5	4.41	0.00432153	0.0591964
biological_process	GO:0003151	outflow tract morphogenesis	54	9	2.793	0.00436556	0.0596519
biological_process	GO:0000077	DNA damage checkpoint	27	6	3.724	0.00447209	0.0605099
biological_process	GO:0001892	embryonic placenta development	27	6	3.724	0.00447209	0.0605099
biological_process	GO:0008045	motor neuron axon guidance	27	6	3.724	0.00447209	0.0605099
biological_process	GO:0022604	regulation of cell morphogenesis	27	6	3.724	0.00447209	0.0605099
biological_process	GO:0090090	negative regulation of canonical Wnt signaling pathway	96	13	2.269	0.0045721	0.0617122
biological_process	GO:0045665	negative regulation of neuron differentiation	75	11	2.458	0.00476406	0.0641467
biological_process	GO:0010976	positive regulation of neuron projection development	142	17	2.006	0.00479479	0.0644037
biological_process	GO:0010634	positive regulation of epithelial cell migration	36	7	3.258	0.00481604	0.0645326
biological_process	GO:0034613	cellular protein localization	55	9	2.742	0.00494922	0.0657053
biological_process	GO:0043588	skin development	55	9	2.742	0.00494922	0.0657053
biological_process	GO:0016575	histone deacetylation	28	6	3.591	0.00540908	0.0714412
biological_process	GO:0030521	androgen receptor signaling pathway	20	5	4.189	0.00548267	0.0717283
biological_process	GO:0035924	cellular response to vascular endothelial growth factor stimulus	20	5	4.189	0.00548267	0.0717283
biological_process	GO:0070507	regulation of microtubule cytoskeleton organization	20	5	4.189	0.00548267	0.0717283
biological_process	GO:0045214	sarcomere organization	37	7	3.17	0.00563965	0.0735091
biological_process	GO:0030705	cytoskeleton-dependent intracellular transport	13	4	5.156	0.00584397	0.0746894
biological_process	GO:0043616	keratinocyte proliferation	13	4	5.156	0.00584397	0.0746894
biological_process	GO:0043923	positive regulation by host of viral transcription	13	4	5.156	0.00584397	0.0746894
biological_process	GO:0043984	histone H4-K16 acetylation	13	4	5.156	0.00584397	0.0746894
biological_process	GO:0045651	positive regulation of macrophage differentiation	13	4	5.156	0.00584397	0.0746894
biological_process	GO:0070935	3'-UTR-mediated mRNA stabilization	13	4	5.156	0.00584397	0.0746894
biological_process	GO:0016049	cell growth	47	8	2.852	0.0061809	0.0773053
biological_process	GO:0038066	p38MAPK cascade	7	3	7.182	0.00618834	0.0773053
biological_process	GO:0048251	elastic fiber assembly	7	3	7.182	0.00618834	0.0773053
biological_process	GO:0060712	spongiotrophoblast layer development	7	3	7.182	0.00618834	0.0773053
biological_process	GO:1900113	negative regulation of histone H3-K9 trimethylation	7	3	7.182	0.00618834	0.0773053
biological_process	GO:2000347	positive regulation of hepatocyte proliferation	7	3	7.182	0.00618834	0.0773053
biological_process	GO:0030155	regulation of cell adhesion	38	7	3.087	0.00656421	0.0816322
biological_process	GO:0009952	anterior/posterior pattern specification	112	14	2.095	0.00683334	0.0834697
biological_process	GO:0006807	nitrogen compound metabolic process	21	5	3.99	0.00684771	0.0834697
biological_process	GO:0035162	embryonic hemopoiesis	21	5	3.99	0.00684771	0.0834697
biological_process	GO:2001235	positive regulation of apoptotic signaling pathway	39	7	3.008	0.00759682	0.0919929
biological_process	GO:0000188	inactivation of MAPK activity	14	4	4.788	0.00779949	0.0922274
biological_process	GO:0001825	blastocyst formation	14	4	4.788	0.00779949	0.0922274
biological_process	GO:0006895	Golgi to endosome transport	14	4	4.788	0.00779949	0.0922274
biological_process	GO:0010832	negative regulation of myotube differentiation	14	4	4.788	0.00779949	0.0922274
biological_process	GO:0050919	negative chemotaxis	14	4	4.788	0.00779949	0.0922274
biological_process	GO:0060413	atrial septum morphogenesis	14	4	4.788	0.00779949	0.0922274
biological_process	GO:0061014	positive regulation of mRNA catabolic process	14	4	4.788	0.00779949	0.0922274
biological_process	GO:2000178	negative regulation of neural precursor cell proliferation	14	4	4.788	0.00779949	0.0922274
biological_process	GO:2001224	positive regulation of neuron migration	14	4	4.788	0.00779949	0.0922274
biological_process	GO:0007049	cell cycle	603	51	1.417	0.00782789	0.0923658
biological_process	GO:0045599	negative regulation of fat cell differentiation	49	8	2.736	0.00798139	0.0935784
biological_process	GO:0006897	endocytosis	174	19	1.83	0.00804649	0.0941423
biological_process	GO:0050731	positive regulation of peptidyl-tyrosine phosphorylation	103	13	2.115	0.00827072	0.0965615
biological_process	GO:0043433	negative regulation of sequence-specific DNA binding transcription factor activity	70	10	2.394	0.0083703	0.0975184
biological_process	GO:0001525	angiogenesis	225	23	1.713	0.00840527	0.09772
biological_process	GO:0010506	regulation of autophagy	40	7	2.933	0.00874458	0.0992298
biological_process	GO:0034446	substrate adhesion-dependent cell spreading	40	7	2.933	0.00874458	0.0992298
biological_process	GO:0008286	insulin receptor signaling pathway	50	8	2.681	0.00901676	0.0992298
biological_process	GO:0006890	retrograde vesicle-mediated transport, Golgi to ER	31	6	3.243	0.00907707	0.0992298
biological_process	GO:0060612	adipose tissue development	31	6	3.243	0.00907707	0.0992298
biological_process	GO:0002726	positive regulation of T cell cytokine production	8	3	6.284	0.00946461	0.0992298
biological_process	GO:0021785	branchiomotor neuron axon guidance	8	3	6.284	0.00946461	0.0992298
biological_process	GO:0031123	RNA 3'-end processing	8	3	6.284	0.00946461	0.0992298
biological_process	GO:0043297	apical junction assembly	8	3	6.284	0.00946461	0.0992298
biological_process	GO:0045602	negative regulation of endothelial cell differentiation	8	3	6.284	0.00946461	0.0992298
biological_process	GO:0048387	negative regulation of retinoic acid receptor signaling pathway	8	3	6.284	0.00946461	0.0992298
biological_process	GO:0051152	positive regulation of smooth muscle cell differentiation	8	3	6.284	0.00946461	0.0992298
biological_process	GO:0060236	regulation of mitotic spindle organization	8	3	6.284	0.00946461	0.0992298
biological_process	GO:0060430	lung saccule development	8	3	6.284	0.00946461	0.0992298
biological_process	GO:0090286	cytoskeletal anchoring at nuclear membrane	8	3	6.284	0.00946461	0.0992298
biological_process	GO:2000643	positive regulation of early endosome to late endosome transport	8	3	6.284	0.00946461	0.0992298
cellular_component	GO:0005634	nucleus	5677	577	1.703	2.93125e-47	1.62215e-43
cellular_component	GO:0005654	nucleoplasm	1806	225	2.088	2.79421e-27	3.09264e-24
cellular_component	GO:0005829	cytosol	2743	297	1.814	8.09665e-26	7.46781e-23
cellular_component	GO:0005737	cytoplasm	5599	499	1.493	1.93885e-24	1.5328e-21
cellular_component	GO:0005925	focal adhesion	355	77	3.635	1.7684e-23	1.08737e-20
cellular_component	GO:0005856	cytoskeleton	1115	128	1.924	5.4899e-13	2.02541e-10
cellular_component	GO:0005913	cell-cell adherens junction	317	55	2.907	7.96e-13	2.75316e-10
cellular_component	GO:0005783	endoplasmic reticulum	1328	139	1.754	4.66102e-11	1.03176e-08
cellular_component	GO:0005794	Golgi apparatus	1166	125	1.796	1.03987e-10	2.05523e-08
cellular_component	GO:0031012	extracellular matrix	285	46	2.705	7.00622e-10	1.29241e-07
cellular_component	GO:0005643	nuclear pore	61	19	5.22	1.30535e-09	2.29418e-07
cellular_component	GO:0030018	Z disc	116	26	3.756	3.66142e-09	6.14009e-07
cellular_component	GO:0005667	transcription factor complex	261	42	2.697	4.19042e-09	6.62565e-07
cellular_component	GO:0016604	nuclear body	274	43	2.63	5.97274e-09	9.18143e-07
cellular_component	GO:0001725	stress fiber	67	19	4.752	7.5282e-09	1.09634e-06
cellular_component	GO:0015629	actin cytoskeleton	186	33	2.973	1.6752e-08	2.31763e-06
cellular_component	GO:0016607	nuclear speck	281	41	2.445	1.07525e-07	1.38382e-05
cellular_component	GO:0043234	protein complex	616	70	1.904	1.73409e-07	1.99926e-05
cellular_component	GO:0005911	cell-cell junction	195	32	2.75	1.80207e-07	2.03524e-05
cellular_component	GO:0042383	sarcolemma	109	22	3.382	4.04932e-07	4.30941e-05
cellular_component	GO:0070062	extracellular exosome	2588	212	1.373	7.88479e-07	8.08045e-05
cellular_component	GO:0000932	P-body	88	19	3.618	8.3644e-07	8.41611e-05
cellular_component	GO:0016020	membrane	6929	494	1.195	1.11083e-06	0.000107848
cellular_component	GO:0030054	cell junction	723	76	1.762	1.14402e-06	0.000109155
cellular_component	GO:0005681	spliceosomal complex	134	24	3.001	1.21569e-06	0.000114027
cellular_component	GO:0034663	endoplasmic reticulum chaperone complex	12	7	9.775	1.61275e-06	0.000148749
cellular_component	GO:0005788	endoplasmic reticulum lumen	46	13	4.736	1.83887e-06	0.000166825
cellular_component	GO:0005730	nucleolus	695	72	1.736	3.67318e-06	0.00030799
cellular_component	GO:0005912	adherens junction	43	12	4.677	5.29266e-06	0.000418423
cellular_component	GO:0031594	neuromuscular junction	66	15	3.809	6.03162e-06	0.000470126
cellular_component	GO:0000123	histone acetyltransferase complex	25	9	6.033	7.98875e-06	0.000589464
cellular_component	GO:0005813	centrosome	428	49	1.919	9.75364e-06	0.000700996
cellular_component	GO:0048471	perinuclear region of cytoplasm	568	60	1.77	1.30333e-05	0.000879591
cellular_component	GO:0042995	cell projection	732	72	1.648	2.16315e-05	0.00134504
cellular_component	GO:0005790	smooth endoplasmic reticulum	28	9	5.386	2.2947e-05	0.00141099
cellular_component	GO:0035327	transcriptionally active chromatin	23	8	5.829	3.4468e-05	0.00188858
cellular_component	GO:0016010	dystrophin-associated glycoprotein complex	13	6	7.734	5.32779e-05	0.00268036
cellular_component	GO:0031965	nuclear membrane	189	26	2.305	6.07812e-05	0.0030303
cellular_component	GO:0035267	NuA4 histone acetyltransferase complex	19	7	6.174	7.08039e-05	0.00334896
cellular_component	GO:0070578	RISC-loading complex	9	5	9.31	7.73311e-05	0.00359162
cellular_component	GO:0016605	PML body	72	14	3.258	7.78812e-05	0.00359162
cellular_component	GO:0005578	proteinaceous extracellular matrix	307	36	1.965	8.66879e-05	0.00396472
cellular_component	GO:0005697	telomerase holoenzyme complex	20	7	5.865	0.000103327	0.00461139
cellular_component	GO:0032587	ruffle membrane	57	12	3.528	0.000112324	0.00493333
cellular_component	GO:0005793	endoplasmic reticulum-Golgi intermediate compartment	49	11	3.762	0.000116951	0.00509612
cellular_component	GO:0005604	basement membrane	97	16	2.764	0.000191893	0.0076952
cellular_component	GO:0000151	ubiquitin ligase complex	88	15	2.856	0.000207523	0.00798421
cellular_component	GO:0034679	integrin alpha9-beta1 complex	3	3	16.758	0.000212085	0.00798421
cellular_component	GO:0044611	nuclear pore inner ring	3	3	16.758	0.000212085	0.00798421
cellular_component	GO:0070939	Dsl1/NZR complex	3	3	16.758	0.000212085	0.00798421
cellular_component	GO:0016442	RISC complex	11	5	7.617	0.000256313	0.00927084
cellular_component	GO:0009898	cytoplasmic side of plasma membrane	46	10	3.643	0.000313839	0.010772
cellular_component	GO:0000785	chromatin	115	17	2.477	0.000469994	0.0142128
cellular_component	GO:0030864	cortical actin cytoskeleton	41	9	3.679	0.000576637	0.016974
cellular_component	GO:0005605	basal lamina	19	6	5.292	0.000617667	0.0179904
cellular_component	GO:0008305	integrin complex	26	7	4.512	0.000639435	0.0182295
cellular_component	GO:0005916	fascia adherens	13	5	6.445	0.000645644	0.0182295
cellular_component	GO:0005622	intracellular	783	69	1.477	0.000784167	0.0207614
cellular_component	GO:0030127	COPII vesicle coat	4	3	12.568	0.000810447	0.0207614
cellular_component	GO:0071953	elastic fiber	4	3	12.568	0.000810447	0.0207614
cellular_component	GO:1990904	ribonucleoprotein complex	4	3	12.568	0.000810447	0.0207614
cellular_component	GO:0009986	cell surface	593	55	1.554	0.0008141	0.0207614
cellular_component	GO:0043034	costamere	20	6	5.027	0.000838098	0.020892
cellular_component	GO:0014704	intercalated disc	52	10	3.223	0.000879498	0.0212539
cellular_component	GO:0017053	transcriptional repressor complex	53	10	3.162	0.0010269	0.0238001
cellular_component	GO:0071339	MLL1 complex	28	7	4.189	0.00103647	0.0238001
cellular_component	GO:0031527	filopodium membrane	15	5	5.586	0.00136269	0.0294575
cellular_component	GO:0030176	integral component of endoplasmic reticulum membrane	85	13	2.563	0.00153096	0.0320922
cellular_component	GO:0030496	midbody	118	16	2.272	0.00174145	0.0358259
cellular_component	GO:0008023	transcription elongation factor complex	23	6	4.372	0.00187109	0.037856
cellular_component	GO:0005884	actin filament	67	11	2.751	0.00192875	0.037856
cellular_component	GO:0000790	nuclear chromatin	227	25	1.846	0.00234958	0.0439276
cellular_component	GO:0005874	microtubule	315	32	1.702	0.0023827	0.0440999
cellular_component	GO:0043231	intracellular membrane-bounded organelle	791	67	1.419	0.00248365	0.0453614
cellular_component	GO:0015630	microtubule cytoskeleton	157	19	2.028	0.00263225	0.0476041
cellular_component	GO:0008180	COP9 signalosome	33	7	3.555	0.00288052	0.0513439
cellular_component	GO:0090575	RNA polymerase II transcription factor complex	33	7	3.555	0.00288052	0.0513439
cellular_component	GO:0000139	Golgi membrane	124	16	2.162	0.0029103	0.0513439
cellular_component	GO:0001527	microfibril	11	4	6.094	0.00296893	0.0513439
cellular_component	GO:0005901	caveola	81	12	2.483	0.00300532	0.0518113
cellular_component	GO:0005938	cell cortex	103	14	2.278	0.00321067	0.0539217
cellular_component	GO:0016592	mediator complex	34	7	3.45	0.00344342	0.0539217
cellular_component	GO:0017177	glucosidase II complex	2	2	16.758	0.00355869	0.0539217
cellular_component	GO:0030981	cortical microtubule cytoskeleton	2	2	16.758	0.00355869	0.0539217
cellular_component	GO:0032116	SMC loading complex	2	2	16.758	0.00355869	0.0539217
cellular_component	GO:0034066	RIC1-RGP1 guanyl-nucleotide exchange factor complex	2	2	16.758	0.00355869	0.0539217
cellular_component	GO:0034667	integrin alpha3-beta1 complex	2	2	16.758	0.00355869	0.0539217
cellular_component	GO:0034677	integrin alpha7-beta1 complex	2	2	16.758	0.00355869	0.0539217
cellular_component	GO:0030896	checkpoint clamp complex	6	3	8.379	0.00369991	0.0539217
cellular_component	GO:0070776	MOZ/MORF histone acetyltransferase complex	6	3	8.379	0.00369991	0.0539217
cellular_component	GO:0097060	synaptic membrane	35	7	3.352	0.0040863	0.0579836
cellular_component	GO:0031143	pseudopodium	12	4	5.586	0.00424448	0.0587224
cellular_component	GO:0005881	cytoplasmic microtubule	55	9	2.742	0.00494922	0.0657053
cellular_component	GO:0000776	kinetochore	120	15	2.095	0.00522614	0.0691901
cellular_component	GO:0001650	fibrillar center	121	15	2.077	0.00564535	0.0735091
cellular_component	GO:0016580	Sin3 complex	13	4	5.156	0.00584397	0.0746894
cellular_component	GO:0032039	integrator complex	13	4	5.156	0.00584397	0.0746894
cellular_component	GO:0034993	LINC complex	7	3	7.182	0.00618834	0.0773053
cellular_component	GO:0005819	spindle	68	10	2.464	0.00682769	0.0834697
cellular_component	GO:0005923	bicellular tight junction	112	14	2.095	0.00683334	0.0834697
cellular_component	GO:0035145	exon-exon junction complex	21	5	3.99	0.00684771	0.0834697
cellular_component	GO:0044306	neuron projection terminus	21	5	3.99	0.00684771	0.0834697
cellular_component	GO:0032993	protein-DNA complex	30	6	3.352	0.00770109	0.0922274
cellular_component	GO:0030175	filopodium	59	9	2.556	0.00790934	0.0929305
cellular_component	GO:0005815	microtubule organizing center	92	12	2.186	0.00847431	0.0979057
cellular_component	GO:0005789	endoplasmic reticulum membrane	251	25	1.669	0.00852835	0.0981342
cellular_component	GO:0016363	nuclear matrix	81	11	2.276	0.00852955	0.0981342
cellular_component	GO:0044295	axonal growth cone	31	6	3.243	0.00907707	0.0992298
cellular_component	GO:0000812	Swr1 complex	8	3	6.284	0.00946461	0.0992298
cellular_component	GO:0044294	dendritic growth cone	8	3	6.284	0.00946461	0.0992298
cellular_component	GO:0044666	MLL3/4 complex	8	3	6.284	0.00946461	0.0992298
molecular_function	GO:0005515	protein binding	4545	447	1.648	1.01564e-30	2.81028e-27
molecular_function	GO:0046872	metal ion binding	2937	307	1.752	3.35659e-24	2.32192e-21
molecular_function	GO:0003723	RNA binding	1404	174	2.077	8.61771e-21	4.76904e-18
molecular_function	GO:0008270	zinc ion binding	932	129	2.319	1.75788e-19	8.10676e-17
molecular_function	GO:0008134	transcription factor binding	347	57	2.753	3.13937e-12	9.65183e-10
molecular_function	GO:0003713	transcription coactivator activity	178	38	3.577	4.76815e-12	1.38879e-09
molecular_function	GO:0019901	protein kinase binding	443	66	2.497	5.94538e-12	1.64509e-09
molecular_function	GO:0003779	actin binding	337	55	2.735	9.80105e-12	2.58281e-09
molecular_function	GO:0000166	nucleotide binding	1862	182	1.638	1.33688e-11	3.36285e-09
molecular_function	GO:0098641	cadherin binding involved in cell-cell adhesion	277	48	2.904	2.37893e-11	5.72391e-09
molecular_function	GO:0003682	chromatin binding	460	66	2.404	3.22697e-11	7.44085e-09
molecular_function	GO:0003677	DNA binding	1723	169	1.644	6.07443e-11	1.29292e-08
molecular_function	GO:0003676	nucleic acid binding	773	93	2.016	8.05547e-11	1.65107e-08
molecular_function	GO:0003700	transcription factor activity, sequence-specific DNA binding	831	92	1.855	7.23073e-09	1.08148e-06
molecular_function	GO:0005524	ATP binding	1371	129	1.577	1.50993e-07	1.89908e-05
molecular_function	GO:0042826	histone deacetylase binding	112	23	3.441	1.59741e-07	1.95544e-05
molecular_function	GO:0051082	unfolded protein binding	80	19	3.98	1.71789e-07	1.99926e-05
molecular_function	GO:0035257	nuclear hormone receptor binding	23	10	7.286	3.1018e-07	3.43307e-05
molecular_function	GO:0003714	transcription corepressor activity	152	26	2.866	1.10927e-06	0.000107848
molecular_function	GO:0051959	dynein light intermediate chain binding	13	7	9.023	3.31344e-06	0.000282101
molecular_function	GO:0004674	protein serine/threonine kinase activity	394	47	1.999	4.94538e-06	0.000396634
molecular_function	GO:0003756	protein disulfide isomerase activity	19	8	7.056	6.58704e-06	0.000504931
molecular_function	GO:0004402	histone acetyltransferase activity	39	11	4.727	1.16678e-05	0.000797155
molecular_function	GO:0044212	transcription regulatory region DNA binding	237	32	2.263	1.34334e-05	0.000895665
molecular_function	GO:0042802	identical protein binding	791	77	1.631	1.62484e-05	0.00104556
molecular_function	GO:0017166	vinculin binding	12	6	8.379	3.02174e-05	0.00176948
molecular_function	GO:0017056	structural constituent of nuclear pore	17	7	6.9	3.03759e-05	0.00176948
molecular_function	GO:0070063	RNA polymerase binding	17	7	6.9	3.03759e-05	0.00176948
molecular_function	GO:0051015	actin filament binding	141	22	2.615	3.22294e-05	0.00183844
molecular_function	GO:0016740	transferase activity	1482	126	1.425	3.30431e-05	0.00184708
molecular_function	GO:0019899	enzyme binding	388	44	1.9	3.42527e-05	0.00188858
molecular_function	GO:0004652	polynucleotide adenylyltransferase activity	8	5	10.474	3.61534e-05	0.00194246
molecular_function	GO:0005178	integrin binding	98	17	2.907	6.41248e-05	0.00314907
molecular_function	GO:0001047	core promoter binding	71	14	3.304	6.63407e-05	0.00319243
molecular_function	GO:0061630	ubiquitin protein ligase activity	196	26	2.223	0.000112056	0.00493333
molecular_function	GO:0001085	RNA polymerase II transcription factor binding	59	12	3.408	0.000159192	0.00667401
molecular_function	GO:0005089	Rho guanyl-nucleotide exchange factor activity	68	13	3.204	0.000166355	0.0068028
molecular_function	GO:0008022	protein C-terminus binding	213	27	2.124	0.000180003	0.00727106
molecular_function	GO:0016757	transferase activity, transferring glycosyl groups	204	26	2.136	0.000215335	0.00805176
molecular_function	GO:0043565	sequence-specific DNA binding	589	57	1.622	0.00023016	0.00854836
molecular_function	GO:0004672	protein kinase activity	513	51	1.666	0.000255137	0.00927084
molecular_function	GO:0071889	14-3-3 protein binding	23	7	5.1	0.000278992	0.00989708
molecular_function	GO:0050431	transforming growth factor beta binding	17	6	5.914	0.000312364	0.010772
molecular_function	GO:0005085	guanyl-nucleotide exchange factor activity	154	21	2.285	0.000337056	0.0114434
molecular_function	GO:0031072	heat shock protein binding	55	11	3.352	0.000345633	0.011663
molecular_function	GO:0035064	methylated histone binding	47	10	3.565	0.00037757	0.0122202
molecular_function	GO:0004386	helicase activity	124	18	2.433	0.000407051	0.0128721
molecular_function	GO:0003712	transcription cofactor activity	49	10	3.42	0.000537552	0.0159936
molecular_function	GO:0003729	mRNA binding	139	19	2.291	0.000614217	0.0179845
molecular_function	GO:0008092	cytoskeletal protein binding	68	12	2.957	0.000630723	0.0182295
molecular_function	GO:0033613	activating transcription factor binding	26	7	4.512	0.000639435	0.0182295
molecular_function	GO:0002134	UTP binding	4	3	12.568	0.000810447	0.0207614
molecular_function	GO:0030374	ligand-dependent nuclear receptor transcription coactivator activity	43	9	3.507	0.000833585	0.020892
molecular_function	GO:0051213	dioxygenase activity	80	13	2.723	0.000860276	0.0212539
molecular_function	GO:0003730	mRNA 3'-UTR binding	52	10	3.223	0.000879498	0.0212539
molecular_function	GO:0031625	ubiquitin protein ligase binding	298	32	1.799	0.000971429	0.0228761
molecular_function	GO:0046332	SMAD binding	53	10	3.162	0.0010269	0.0238001
molecular_function	GO:0008307	structural constituent of muscle	28	7	4.189	0.00103647	0.0238001
molecular_function	GO:0017048	Rho GTPase binding	36	8	3.724	0.00106308	0.0243103
molecular_function	GO:0031490	chromatin DNA binding	63	11	2.926	0.00114906	0.026061
molecular_function	GO:0000978	RNA polymerase II core promoter proximal region sequence-specific DNA binding	352	36	1.714	0.00118011	0.0266561
molecular_function	GO:0002162	dystroglycan binding	9	4	7.448	0.00124833	0.027744
molecular_function	GO:0001968	fibronectin binding	29	7	4.045	0.00129662	0.0285875
molecular_function	GO:0070300	phosphatidic acid binding	15	5	5.586	0.00136269	0.0294575
molecular_function	GO:0000976	transcription regulatory region sequence-specific DNA binding	55	10	3.047	0.00138241	0.0297676
molecular_function	GO:1990841	promoter-specific chromatin binding	22	6	4.57	0.00145576	0.0308666
molecular_function	GO:0004725	protein tyrosine phosphatase activity	95	14	2.47	0.00148346	0.0313338
molecular_function	GO:0003725	double-stranded RNA binding	65	11	2.836	0.00149782	0.0315168
molecular_function	GO:0005080	protein kinase C binding	56	10	2.992	0.00159441	0.0331709
molecular_function	GO:0045296	cadherin binding	30	7	3.91	0.00160513	0.0332688
molecular_function	GO:0035091	phosphatidylinositol binding	86	13	2.533	0.001707	0.0352483
molecular_function	GO:0070182	DNA polymerase binding	16	5	5.237	0.00188535	0.037856
molecular_function	GO:0005047	signal recognition particle binding	5	3	10.055	0.00193589	0.037856
molecular_function	GO:0071558	histone demethylase activity (H3-K27 specific)	5	3	10.055	0.00193589	0.037856
molecular_function	GO:0005487	nucleocytoplasmic transporter activity	17	5	4.929	0.00254076	0.0461001
molecular_function	GO:0046982	protein heterodimerization activity	517	47	1.523	0.00278229	0.0499909
molecular_function	GO:0016301	kinase activity	614	54	1.474	0.00288687	0.0513439
molecular_function	GO:0016671	oxidoreductase activity, acting on a sulfur group of donors, disulfide as acceptor	11	4	6.094	0.00296893	0.0513439
molecular_function	GO:0032454	histone demethylase activity (H3-K9 specific)	11	4	6.094	0.00296893	0.0513439
molecular_function	GO:0035259	glucocorticoid receptor binding	18	5	4.655	0.00334683	0.0539217
molecular_function	GO:0000977	RNA polymerase II regulatory region sequence-specific DNA binding	197	22	1.871	0.00350602	0.0539217
molecular_function	GO:0001025	RNA polymerase III transcription factor binding	2	2	16.758	0.00355869	0.0539217
molecular_function	GO:0002135	CTP binding	2	2	16.758	0.00355869	0.0539217
molecular_function	GO:0004577	N-acetylglucosaminyldiphosphodolichol N-acetylglucosaminyltransferase activity	2	2	16.758	0.00355869	0.0539217
molecular_function	GO:0004651	polynucleotide 5'-phosphatase activity	2	2	16.758	0.00355869	0.0539217
molecular_function	GO:0033549	MAP kinase phosphatase activity	2	2	16.758	0.00355869	0.0539217
molecular_function	GO:0001077	transcriptional activator activity, RNA polymerase II core promoter proximal region sequence-specific binding	260	27	1.74	0.0036978	0.0539217
molecular_function	GO:0000988	transcription factor activity, protein binding	6	3	8.379	0.00369991	0.0539217
molecular_function	GO:0032051	clathrin light chain binding	6	3	8.379	0.00369991	0.0539217
molecular_function	GO:0004721	phosphoprotein phosphatase activity	139	17	2.049	0.00385375	0.055829
molecular_function	GO:0001046	core promoter sequence-specific DNA binding	44	8	3.047	0.004079	0.0579836
molecular_function	GO:0035497	cAMP response element binding	12	4	5.586	0.00424448	0.0587224
molecular_function	GO:0035925	mRNA 3'-UTR AU-rich region binding	12	4	5.586	0.00424448	0.0587224
molecular_function	GO:0042975	peroxisome proliferator activated receptor binding	19	5	4.41	0.00432153	0.0591964
molecular_function	GO:0002020	protease binding	108	14	2.172	0.00495105	0.0657053
molecular_function	GO:0031418	L-ascorbic acid binding	20	5	4.189	0.00548267	0.0717283
molecular_function	GO:0050839	cell adhesion molecule binding	67	10	2.501	0.0061441	0.0773053
molecular_function	GO:0005114	type II transforming growth factor beta receptor binding	7	3	7.182	0.00618834	0.0773053
molecular_function	GO:0030306	ADP-ribosylation factor binding	7	3	7.182	0.00618834	0.0773053
molecular_function	GO:0004842	ubiquitin-protein transferase activity	336	32	1.596	0.00628568	0.0783445
molecular_function	GO:0000979	RNA polymerase II core promoter sequence-specific DNA binding	68	10	2.464	0.00682769	0.0834697
molecular_function	GO:0004709	MAP kinase kinase kinase activity	21	5	3.99	0.00684771	0.0834697
molecular_function	GO:0005525	GTP binding	340	32	1.577	0.00744335	0.0905307
molecular_function	GO:0004857	enzyme inhibitor activity	39	7	3.008	0.00759682	0.0919929
molecular_function	GO:0005388	calcium-transporting ATPase activity	14	4	4.788	0.00779949	0.0922274
molecular_function	GO:0004702	signal transducer, downstream of receptor, with serine/threonine kinase activity	59	9	2.556	0.00790934	0.0929305
molecular_function	GO:0070412	R-SMAD binding	22	5	3.809	0.00843358	0.0978437
molecular_function	GO:0019904	protein domain specific binding	290	28	1.618	0.00846754	0.0979057
molecular_function	GO:0043621	protein self-association	60	9	2.514	0.00882496	0.0992298
molecular_function	GO:0035035	histone acetyltransferase binding	31	6	3.243	0.00907707	0.0992298
molecular_function	GO:0019900	kinase binding	93	12	2.162	0.00921636	0.0992298
molecular_function	GO:0032452	histone demethylase activity	8	3	6.284	0.00946461	0.0992298
molecular_function	GO:0035197	siRNA binding	8	3	6.284	0.00946461	0.0992298
molecular_function	GO:1990405	protein antigen binding	8	3	6.284	0.00946461	0.0992298

## Sheet: Down CIH12W vs Nor12W
Catergory	GO_ID	GO_Name	Population_mapped_id	Study_mapped_id	Enrichment	P_value	FDR
biological_process	GO:0055114	oxidation-reduction process	669	127	3.709	8.42153e-39	9.28895e-36
biological_process	GO:0006631	fatty acid metabolic process	154	50	6.344	6.28604e-27	4.62233e-24
biological_process	GO:0006629	lipid metabolic process	454	75	3.228	1.71586e-19	9.46296e-17
biological_process	GO:0008152	metabolic process	439	73	3.249	3.61412e-19	1.77172e-16
biological_process	GO:0006099	tricarboxylic acid cycle	29	18	12.128	1.04099e-16	4.17532e-14
biological_process	GO:0007286	spermatid development	172	39	4.43	2.42846e-15	8.24181e-13
biological_process	GO:0006635	fatty acid beta-oxidation	39	18	9.018	1.15048e-13	3.38393e-11
biological_process	GO:0006810	transport	1803	161	1.745	1.62171e-12	4.20882e-10
biological_process	GO:0006754	ATP biosynthetic process	23	12	10.194	2.45078e-10	5.14897e-08
biological_process	GO:0050873	brown fat cell differentiation	34	13	7.471	5.26152e-09	8.59771e-07
biological_process	GO:0061732	mitochondrial acetyl-CoA biosynthetic process from pyruvate	8	7	17.097	6.9171e-09	1.08994e-06
biological_process	GO:0009060	aerobic respiration	25	11	8.597	1.38568e-08	2.10815e-06
biological_process	GO:0006734	NADH metabolic process	12	8	13.026	1.89527e-08	2.6974e-06
biological_process	GO:0033539	fatty acid beta-oxidation using acyl-CoA dehydrogenase	9	7	15.197	2.97415e-08	4.10061e-06
biological_process	GO:0006123	mitochondrial electron transport, cytochrome c to oxygen	13	8	12.024	4.70541e-08	5.9315e-06
biological_process	GO:0009409	response to cold	28	11	7.676	5.79084e-08	7.097e-06
biological_process	GO:0006633	fatty acid biosynthetic process	72	17	4.613	9.50364e-08	1.07513e-05
biological_process	GO:0015986	ATP synthesis coupled proton transport	20	9	8.793	2.35416e-07	2.41547e-05
biological_process	GO:0006120	mitochondrial electron transport, NADH to ubiquinone	11	7	12.434	2.48926e-07	2.49605e-05
biological_process	GO:0006979	response to oxidative stress	115	21	3.568	3.45704e-07	3.38944e-05
biological_process	GO:0006122	mitochondrial electron transport, ubiquinol to cytochrome c	12	7	11.398	5.70889e-07	5.35907e-05
biological_process	GO:0006102	isocitrate metabolic process	6	5	16.283	2.00177e-06	0.000169842
biological_process	GO:0001676	long-chain fatty acid metabolic process	19	8	8.227	2.09607e-06	0.000171256
biological_process	GO:0022904	respiratory electron transport chain	19	8	8.227	2.09607e-06	0.000171256
biological_process	GO:0031649	heat generation	4	4	19.539	6.82909e-06	0.000502165
biological_process	GO:0019432	triglyceride biosynthetic process	12	6	9.77	1.25645e-05	0.000894103
biological_process	GO:0051289	protein homotetramerization	72	14	3.799	1.44656e-05	0.00101305
biological_process	GO:0046034	ATP metabolic process	39	10	5.01	1.93715e-05	0.00127563
biological_process	GO:0015992	proton transport	57	12	4.114	2.5451e-05	0.00160414
biological_process	GO:0032981	mitochondrial respiratory chain complex I assembly	19	7	7.199	2.64522e-05	0.00164376
biological_process	GO:0006085	acetyl-CoA biosynthetic process	5	4	15.631	3.27517e-05	0.00180626
biological_process	GO:0006086	acetyl-CoA biosynthetic process from pyruvate	5	4	15.631	3.27517e-05	0.00180626
biological_process	GO:0031999	negative regulation of fatty acid beta-oxidation	5	4	15.631	3.27517e-05	0.00180626
biological_process	GO:0006103	2-oxoglutarate metabolic process	14	6	8.374	3.7367e-05	0.00198631
biological_process	GO:0008610	lipid biosynthetic process	14	6	8.374	3.7367e-05	0.00198631
biological_process	GO:0015909	long-chain fatty acid transport	10	5	9.77	7.07107e-05	0.00358592
biological_process	GO:0000038	very long-chain fatty acid metabolic process	16	6	7.327	9.12002e-05	0.00452107
biological_process	GO:0015908	fatty acid transport	16	6	7.327	9.12002e-05	0.00452107
biological_process	GO:0044539	long-chain fatty acid import	6	4	13.026	9.42516e-05	0.00456965
biological_process	GO:0002025	vasodilation by norepinephrine-epinephrine involved in regulation of systemic arterial blood pressure	3	3	19.539	0.000133744	0.0057289
biological_process	GO:0019254	carnitine metabolic process, CoA-linked	3	3	19.539	0.000133744	0.0057289
biological_process	GO:0006641	triglyceride metabolic process	40	9	4.396	0.000151687	0.00643505
biological_process	GO:0006084	acetyl-CoA metabolic process	7	4	11.165	0.000210975	0.00823737
biological_process	GO:0006108	malate metabolic process	7	4	11.165	0.000210975	0.00823737
biological_process	GO:0042760	very long-chain fatty acid catabolic process	7	4	11.165	0.000210975	0.00823737
biological_process	GO:0046322	negative regulation of fatty acid oxidation	7	4	11.165	0.000210975	0.00823737
biological_process	GO:0019915	lipid storage	26	7	5.261	0.000251944	0.00975066
biological_process	GO:0002024	diet induced thermogenesis	13	5	7.515	0.000317349	0.011967
biological_process	GO:0042407	cristae formation	13	5	7.515	0.000317349	0.011967
biological_process	GO:0006839	mitochondrial transport	44	9	3.997	0.000327135	0.0121287
biological_process	GO:0022900	electron transport chain	8	4	9.77	0.000404818	0.0148838
biological_process	GO:0042593	glucose homeostasis	120	16	2.605	0.000412468	0.0150398
biological_process	GO:0042755	eating behavior	37	8	4.225	0.000470254	0.0166906
biological_process	GO:0001659	temperature homeostasis	21	6	5.583	0.000495652	0.0166906
biological_process	GO:0035106	operant conditioning	4	3	14.654	0.000514487	0.0166906
biological_process	GO:0042776	mitochondrial ATP synthesis coupled proton transport	4	3	14.654	0.000514487	0.0166906
biological_process	GO:0046320	regulation of fatty acid oxidation	4	3	14.654	0.000514487	0.0166906
biological_process	GO:1902109	negative regulation of mitochondrial membrane permeability involved in apoptotic process	4	3	14.654	0.000514487	0.0166906
biological_process	GO:1990845	adaptive thermogenesis	4	3	14.654	0.000514487	0.0166906
biological_process	GO:0051881	regulation of mitochondrial membrane potential	30	7	4.559	0.000651724	0.0209884
biological_process	GO:0006694	steroid biosynthetic process	58	10	3.369	0.000657303	0.0210147
biological_process	GO:0050872	white fat cell differentiation	15	5	6.513	0.000679552	0.0214156
biological_process	GO:0050995	negative regulation of lipid catabolic process	15	5	6.513	0.000679552	0.0214156
biological_process	GO:0019395	fatty acid oxidation	16	5	6.106	0.000946984	0.0292174
biological_process	GO:0055088	lipid homeostasis	24	6	4.885	0.0010776	0.0327888
biological_process	GO:0006105	succinate metabolic process	10	4	7.816	0.00111809	0.0328868
biological_process	GO:0009062	fatty acid catabolic process	10	4	7.816	0.00111809	0.0328868
biological_process	GO:0010917	negative regulation of mitochondrial membrane potential	10	4	7.816	0.00111809	0.0328868
biological_process	GO:0090181	regulation of cholesterol metabolic process	10	4	7.816	0.00111809	0.0328868
biological_process	GO:0009052	pentose-phosphate shunt, non-oxidative branch	5	3	11.724	0.00123709	0.0359082
biological_process	GO:0010891	negative regulation of sequestering of triglyceride	5	3	11.724	0.00123709	0.0359082
biological_process	GO:0010867	positive regulation of triglyceride biosynthetic process	17	5	5.747	0.00128537	0.0368251
biological_process	GO:0006885	regulation of pH	25	6	4.689	0.00135709	0.0386288
biological_process	GO:0006112	energy reserve metabolic process	11	4	7.105	0.00168605	0.0473813
biological_process	GO:0008654	phospholipid biosynthetic process	55	9	3.197	0.0017725	0.0491841
biological_process	GO:0045444	fat cell differentiation	78	11	2.756	0.00201012	0.0554291
biological_process	GO:0072593	reactive oxygen species metabolic process	36	7	3.799	0.00204451	0.0560273
biological_process	GO:0061436	establishment of skin barrier	19	5	5.142	0.00221769	0.0560554
biological_process	GO:0033211	adiponectin-activated signaling pathway	6	3	9.77	0.00237993	0.0560554
biological_process	GO:0042423	catecholamine biosynthetic process	6	3	9.77	0.00237993	0.0560554
biological_process	GO:0044597	daunorubicin metabolic process	6	3	9.77	0.00237993	0.0560554
biological_process	GO:0044598	doxorubicin metabolic process	6	3	9.77	0.00237993	0.0560554
biological_process	GO:0050891	multicellular organismal water homeostasis	6	3	9.77	0.00237993	0.0560554
biological_process	GO:0060372	regulation of atrial cardiac muscle cell membrane repolarization	6	3	9.77	0.00237993	0.0560554
biological_process	GO:0071321	cellular response to cGMP	6	3	9.77	0.00237993	0.0560554
biological_process	GO:2001236	regulation of extrinsic apoptotic signaling pathway	6	3	9.77	0.00237993	0.0560554
biological_process	GO:0042416	dopamine biosynthetic process	12	4	6.513	0.00242714	0.0560554
biological_process	GO:0071285	cellular response to lithium ion	12	4	6.513	0.00242714	0.0560554
biological_process	GO:0006850	mitochondrial pyruvate transport	2	2	19.539	0.00261728	0.0560554
biological_process	GO:0010747	positive regulation of plasma membrane long-chain fatty acid transport	2	2	19.539	0.00261728	0.0560554
biological_process	GO:0016488	farnesol catabolic process	2	2	19.539	0.00261728	0.0560554
biological_process	GO:0019413	acetate biosynthetic process	2	2	19.539	0.00261728	0.0560554
biological_process	GO:0019427	acetyl-CoA biosynthetic process from acetate	2	2	19.539	0.00261728	0.0560554
biological_process	GO:0019542	propionate biosynthetic process	2	2	19.539	0.00261728	0.0560554
biological_process	GO:0046356	acetyl-CoA catabolic process	2	2	19.539	0.00261728	0.0560554
biological_process	GO:0097089	methyl-branched fatty acid metabolic process	2	2	19.539	0.00261728	0.0560554
biological_process	GO:1902361	mitochondrial pyruvate transmembrane transport	2	2	19.539	0.00261728	0.0560554
biological_process	GO:1903426	regulation of reactive oxygen species biosynthetic process	2	2	19.539	0.00261728	0.0560554
biological_process	GO:0046928	regulation of neurotransmitter secretion	20	5	4.885	0.00283359	0.0603953
biological_process	GO:0071456	cellular response to hypoxia	60	9	2.931	0.00328121	0.0695961
biological_process	GO:0006749	glutathione metabolic process	39	7	3.507	0.00329683	0.0695961
biological_process	GO:0006779	porphyrin-containing compound biosynthetic process	13	4	6.012	0.00336483	0.0696977
biological_process	GO:0071880	adenylate cyclase-activating adrenergic receptor signaling pathway	13	4	6.012	0.00336483	0.0696977
biological_process	GO:1903206	negative regulation of hydrogen peroxide-induced cell death	13	4	6.012	0.00336483	0.0696977
biological_process	GO:0006006	glucose metabolic process	61	9	2.883	0.00367796	0.0751257
biological_process	GO:0043524	negative regulation of neuron apoptotic process	161	17	2.063	0.00374375	0.0761171
biological_process	GO:0006000	fructose metabolic process	7	3	8.374	0.00400665	0.0792705
biological_process	GO:0006475	internal protein amino acid acetylation	7	3	8.374	0.00400665	0.0792705
biological_process	GO:0010890	positive regulation of sequestering of triglyceride	7	3	8.374	0.00400665	0.0792705
biological_process	GO:0031667	response to nutrient levels	7	3	8.374	0.00400665	0.0792705
biological_process	GO:0086014	atrial cardiac muscle cell action potential	7	3	8.374	0.00400665	0.0792705
biological_process	GO:0001541	ovarian follicle development	51	8	3.065	0.00411991	0.0811476
biological_process	GO:0005975	carbohydrate metabolic process	190	19	1.954	0.00414386	0.0812565
biological_process	GO:0045777	positive regulation of blood pressure	31	6	3.782	0.00434168	0.0847588
biological_process	GO:0035634	response to stilbenoid	22	5	4.441	0.00442067	0.0859207
biological_process	GO:0006107	oxaloacetate metabolic process	14	4	5.583	0.0045216	0.0863606
biological_process	GO:0030224	monocyte differentiation	14	4	5.583	0.0045216	0.0863606
biological_process	GO:0030949	positive regulation of vascular endothelial growth factor receptor signaling pathway	14	4	5.583	0.0045216	0.0863606
biological_process	GO:0019433	triglyceride catabolic process	15	4	5.21	0.00591871	0.11107
biological_process	GO:0015670	carbon dioxide transport	8	3	7.327	0.00616774	0.11107
biological_process	GO:0034551	mitochondrial respiratory chain complex III assembly	8	3	7.327	0.00616774	0.11107
biological_process	GO:0042596	fear response	8	3	7.327	0.00616774	0.11107
biological_process	GO:0045446	endothelial cell differentiation	8	3	7.327	0.00616774	0.11107
biological_process	GO:0045986	negative regulation of smooth muscle contraction	8	3	7.327	0.00616774	0.11107
biological_process	GO:0046069	cGMP catabolic process	8	3	7.327	0.00616774	0.11107
biological_process	GO:0046321	positive regulation of fatty acid oxidation	8	3	7.327	0.00616774	0.11107
biological_process	GO:0050810	regulation of steroid biosynthetic process	8	3	7.327	0.00616774	0.11107
biological_process	GO:0060907	positive regulation of macrophage cytokine production	8	3	7.327	0.00616774	0.11107
biological_process	GO:0007613	memory	78	10	2.505	0.00631762	0.113306
biological_process	GO:0005978	glycogen biosynthetic process	16	4	4.885	0.00757595	0.117824
biological_process	GO:0040015	negative regulation of multicellular organism growth	16	4	4.885	0.00757595	0.117824
biological_process	GO:0003051	angiotensin-mediated drinking behavior	3	2	13.026	0.00758434	0.117824
biological_process	GO:0006121	mitochondrial electron transport, succinate to ubiquinone	3	2	13.026	0.00758434	0.117824
biological_process	GO:0006589	octopamine biosynthetic process	3	2	13.026	0.00758434	0.117824
biological_process	GO:0006598	polyamine catabolic process	3	2	13.026	0.00758434	0.117824
biological_process	GO:0010636	positive regulation of mitochondrial fusion	3	2	13.026	0.00758434	0.117824
biological_process	GO:0010871	negative regulation of receptor biosynthetic process	3	2	13.026	0.00758434	0.117824
biological_process	GO:0042321	negative regulation of circadian sleep/wake cycle, sleep	3	2	13.026	0.00758434	0.117824
biological_process	GO:0042758	long-chain fatty acid catabolic process	3	2	13.026	0.00758434	0.117824
biological_process	GO:0048483	autonomic nervous system development	3	2	13.026	0.00758434	0.117824
biological_process	GO:0055096	low-density lipoprotein particle mediated signaling	3	2	13.026	0.00758434	0.117824
biological_process	GO:0060421	positive regulation of heart growth	3	2	13.026	0.00758434	0.117824
biological_process	GO:0071073	positive regulation of phospholipid biosynthetic process	3	2	13.026	0.00758434	0.117824
biological_process	GO:0086067	AV node cell to bundle of His cell communication	3	2	13.026	0.00758434	0.117824
biological_process	GO:1990542	mitochondrial transmembrane transport	3	2	13.026	0.00758434	0.117824
biological_process	GO:2000984	negative regulation of ATP citrate synthase activity	3	2	13.026	0.00758434	0.117824
biological_process	GO:0006094	gluconeogenesis	25	5	3.908	0.00785478	0.120717
biological_process	GO:0006090	pyruvate metabolic process	9	3	6.513	0.00890205	0.130919
biological_process	GO:0006654	phosphatidic acid biosynthetic process	9	3	6.513	0.00890205	0.130919
biological_process	GO:0032000	positive regulation of fatty acid beta-oxidation	9	3	6.513	0.00890205	0.130919
biological_process	GO:0042421	norepinephrine biosynthetic process	9	3	6.513	0.00890205	0.130919
biological_process	GO:0045823	positive regulation of heart contraction	9	3	6.513	0.00890205	0.130919
biological_process	GO:0045955	negative regulation of calcium ion-dependent exocytosis	9	3	6.513	0.00890205	0.130919
biological_process	GO:0046339	diacylglycerol metabolic process	9	3	6.513	0.00890205	0.130919
biological_process	GO:0048739	cardiac muscle fiber development	9	3	6.513	0.00890205	0.130919
biological_process	GO:0014070	response to organic cyclic compound	36	6	3.257	0.00924609	0.135527
biological_process	GO:0007606	sensory perception of chemical stimulus	235	21	1.746	0.00956961	0.139344
cellular_component	GO:0005739	mitochondrion	1697	293	3.374	2.36028e-82	1.04136e-78
cellular_component	GO:0005743	mitochondrial inner membrane	380	132	6.787	5.74593e-74	1.26755e-70
cellular_component	GO:0070469	respiratory chain	57	40	13.712	7.5722e-39	9.28895e-36
cellular_component	GO:0005747	mitochondrial respiratory chain complex I	41	29	13.82	1.16488e-28	1.02789e-25
cellular_component	GO:0043209	myelin sheath	188	43	4.469	6.3937e-17	2.8209e-14
cellular_component	GO:0031966	mitochondrial membrane	67	22	6.416	9.84619e-13	2.71509e-10
cellular_component	GO:0005777	peroxisome	129	29	4.393	1.13936e-11	2.64572e-09
cellular_component	GO:0005753	mitochondrial proton-transporting ATP synthase complex	16	10	12.212	7.18341e-10	1.37797e-07
cellular_component	GO:0005750	mitochondrial respiratory chain complex III	10	8	15.631	1.88977e-09	3.47402e-07
cellular_component	GO:0070062	extracellular exosome	2588	198	1.495	3.22849e-09	5.69764e-07
cellular_component	GO:0005758	mitochondrial intermembrane space	60	17	5.536	4.85978e-09	8.24667e-07
cellular_component	GO:0016020	membrane	6929	442	1.246	1.8897e-08	2.6974e-06
cellular_component	GO:0016021	integral component of membrane	5298	346	1.276	1.61716e-07	1.74022e-05
cellular_component	GO:0005751	mitochondrial respiratory chain complex IV	15	8	10.421	2.1454e-07	2.25369e-05
cellular_component	GO:0045254	pyruvate dehydrogenase complex	8	6	14.654	4.54918e-07	4.36326e-05
cellular_component	GO:0005740	mitochondrial envelope	18	8	8.684	1.27063e-06	0.000114409
cellular_component	GO:0061617	MICOS complex	6	5	16.283	2.00177e-06	0.000169842
cellular_component	GO:0000276	mitochondrial proton-transporting ATP synthase complex, coupling factor F(o)	11	6	10.658	6.56767e-06	0.000499596
cellular_component	GO:0005811	lipid particle	67	13	3.791	2.97649e-05	0.00180626
cellular_component	GO:0000275	mitochondrial proton-transporting ATP synthase complex, catalytic core F(1)	5	4	15.631	3.27517e-05	0.00180626
cellular_component	GO:0005746	mitochondrial respiratory chain	5	4	15.631	3.27517e-05	0.00180626
cellular_component	GO:0045261	proton-transporting ATP synthase complex, catalytic core F(1)	5	4	15.631	3.27517e-05	0.00180626
cellular_component	GO:0005759	mitochondrial matrix	112	17	2.966	5.45169e-05	0.00282975
cellular_component	GO:0031305	integral component of mitochondrial inner membrane	21	7	6.513	5.57748e-05	0.00286138
cellular_component	GO:0005749	mitochondrial respiratory chain complex II, succinate dehydrogenase complex (ubiquinone)	3	3	19.539	0.000133744	0.0057289
cellular_component	GO:0017133	mitochondrial electron transfer flavoprotein complex	3	3	19.539	0.000133744	0.0057289
cellular_component	GO:0005741	mitochondrial outer membrane	136	18	2.586	0.000203034	0.00823737
cellular_component	GO:0045263	proton-transporting ATP synthase complex, coupling factor F(o)	12	5	8.141	0.000203876	0.00823737
cellular_component	GO:0005778	peroxisomal membrane	44	9	3.997	0.000327135	0.0121287
cellular_component	GO:0035686	sperm fibrous sheath	14	5	6.978	0.000472894	0.0166906
cellular_component	GO:0036477	somatodendritic compartment	9	4	8.684	0.00069914	0.0218766
cellular_component	GO:0030424	axon	343	31	1.766	0.00162472	0.0459505
cellular_component	GO:0032437	cuticular plate	6	3	9.77	0.00237993	0.0560554
cellular_component	GO:0016507	mitochondrial fatty acid beta-oxidation multienzyme complex	2	2	19.539	0.00261728	0.0560554
cellular_component	GO:0045271	respiratory chain complex I	2	2	19.539	0.00261728	0.0560554
cellular_component	GO:1904602	serotonin-activated cation-selective channel complex	2	2	19.539	0.00261728	0.0560554
cellular_component	GO:0016528	sarcoplasm	8	3	7.327	0.00616774	0.11107
cellular_component	GO:0005967	mitochondrial pyruvate dehydrogenase complex	3	2	13.026	0.00758434	0.117824
cellular_component	GO:0009331	glycerol-3-phosphate dehydrogenase complex	3	2	13.026	0.00758434	0.117824
cellular_component	GO:0036488	CHOP-C/EBP complex	3	2	13.026	0.00758434	0.117824
cellular_component	GO:0045277	respiratory chain complex IV	3	2	13.026	0.00758434	0.117824
cellular_component	GO:0034706	sodium channel complex	9	3	6.513	0.00890205	0.130919
molecular_function	GO:0016491	oxidoreductase activity	585	94	3.14	2.82452e-23	1.78025e-20
molecular_function	GO:0003824	catalytic activity	471	70	2.904	8.57988e-16	3.15454e-13
molecular_function	GO:0008137	NADH dehydrogenase (ubiquinone) activity	25	15	11.724	8.03001e-14	2.5306e-11
molecular_function	GO:0004129	cytochrome-c oxidase activity	27	14	10.131	8.43569e-12	2.06768e-09
molecular_function	GO:0003954	NADH dehydrogenase activity	11	9	15.987	1.17351e-10	2.58877e-08
molecular_function	GO:0016651	oxidoreductase activity, acting on NAD(P)H	12	9	14.654	4.47952e-10	8.98347e-08
molecular_function	GO:0000062	fatty-acyl-CoA binding	22	10	8.881	4.37227e-08	5.84559e-06
molecular_function	GO:0046933	proton-transporting ATP synthase activity, rotational mechanism	13	8	12.024	4.70541e-08	5.9315e-06
molecular_function	GO:0051287	NAD binding	48	14	5.699	7.37486e-08	8.79402e-06
molecular_function	GO:0009055	electron carrier activity	35	12	6.699	8.53128e-08	9.90526e-06
molecular_function	GO:0008121	ubiquinol-cytochrome-c reductase activity	7	6	16.748	1.18917e-07	1.31166e-05
molecular_function	GO:0016747	transferase activity, transferring acyl groups other than amino-acyl groups	22	9	7.993	6.35194e-07	5.83849e-05
molecular_function	GO:0034604	pyruvate dehydrogenase (NAD+) activity	6	5	16.283	2.00177e-06	0.000169842
molecular_function	GO:0051536	iron-sulfur cluster binding	63	14	4.342	2.7835e-06	0.000223288
molecular_function	GO:0016746	transferase activity, transferring acyl groups	167	24	2.808	4.65097e-06	0.00036643
molecular_function	GO:0042803	protein homodimerization activity	787	70	1.738	5.0778e-06	0.000393039
molecular_function	GO:0051380	norepinephrine binding	4	4	19.539	6.82909e-06	0.000502165
molecular_function	GO:0016616	oxidoreductase activity, acting on the CH-OH group of donors, NAD or NADP as acceptor	29	9	6.064	9.23847e-06	0.000668199
molecular_function	GO:0003857	3-hydroxyacyl-CoA dehydrogenase activity	8	5	12.212	1.71322e-05	0.00114526
molecular_function	GO:0004300	enoyl-CoA hydratase activity	8	5	12.212	1.71322e-05	0.00114526
molecular_function	GO:0102391	decanoate--CoA ligase activity	8	5	12.212	1.71322e-05	0.00114526
molecular_function	GO:0004467	long-chain fatty acid-CoA ligase activity	13	6	9.018	2.23208e-05	0.00142735
molecular_function	GO:0016829	lyase activity	137	20	2.852	2.23226e-05	0.00142735
molecular_function	GO:0003988	acetyl-CoA C-acyltransferase activity	5	4	15.631	3.27517e-05	0.00180626
molecular_function	GO:0004075	biotin carboxylase activity	5	4	15.631	3.27517e-05	0.00180626
molecular_function	GO:0050660	flavin adenine dinucleotide binding	59	12	3.974	3.66498e-05	0.00198631
molecular_function	GO:0016627	oxidoreductase activity, acting on the CH-CH group of donors	27	8	5.789	4.26588e-05	0.0022406
molecular_function	GO:0051379	epinephrine binding	6	4	13.026	9.42516e-05	0.00456965
molecular_function	GO:0000104	succinate dehydrogenase activity	3	3	19.539	0.000133744	0.0057289
molecular_function	GO:0003987	acetate-CoA ligase activity	3	3	19.539	0.000133744	0.0057289
molecular_function	GO:0004118	cGMP-stimulated cyclic-nucleotide phosphodiesterase activity	3	3	19.539	0.000133744	0.0057289
molecular_function	GO:0004174	electron-transferring-flavoprotein dehydrogenase activity	3	3	19.539	0.000133744	0.0057289
molecular_function	GO:0008177	succinate dehydrogenase (ubiquinone) activity	3	3	19.539	0.000133744	0.0057289
molecular_function	GO:0016508	long-chain-enoyl-CoA hydratase activity	3	3	19.539	0.000133744	0.0057289
molecular_function	GO:0036041	long-chain fatty acid binding	3	3	19.539	0.000133744	0.0057289
molecular_function	GO:0070538	oleic acid binding	3	3	19.539	0.000133744	0.0057289
molecular_function	GO:0051537	2 iron, 2 sulfur cluster binding	25	7	5.471	0.000192573	0.00809174
molecular_function	GO:0004032	alditol:NADP+ 1-oxidoreductase activity	12	5	8.141	0.000203876	0.00823737
molecular_function	GO:0003995	acyl-CoA dehydrogenase activity	7	4	11.165	0.000210975	0.00823737
molecular_function	GO:0036094	small molecule binding	13	5	7.515	0.000317349	0.011967
molecular_function	GO:0070402	NADPH binding	14	5	6.978	0.000472894	0.0166906
molecular_function	GO:0003846	2-acylglycerol O-acyltransferase activity	4	3	14.654	0.000514487	0.0166906
molecular_function	GO:0003985	acetyl-CoA C-acetyltransferase activity	4	3	14.654	0.000514487	0.0166906
molecular_function	GO:0004144	diacylglycerol O-acyltransferase activity	4	3	14.654	0.000514487	0.0166906
molecular_function	GO:0004165	dodecenoyl-CoA delta-isomerase activity	4	3	14.654	0.000514487	0.0166906
molecular_function	GO:0004449	isocitrate dehydrogenase (NAD+) activity	4	3	14.654	0.000514487	0.0166906
molecular_function	GO:0009374	biotin binding	4	3	14.654	0.000514487	0.0166906
molecular_function	GO:0004114	3',5'-cyclic-nucleotide phosphodiesterase activity	23	6	5.097	0.000844459	0.0262377
molecular_function	GO:0030552	cAMP binding	24	6	4.885	0.0010776	0.0327888
molecular_function	GO:0004935	adrenergic receptor activity	10	4	7.816	0.00111809	0.0328868
molecular_function	GO:0004806	triglyceride lipase activity	17	5	5.747	0.00128537	0.0368251
molecular_function	GO:0051539	4 iron, 4 sulfur cluster binding	35	7	3.908	0.00172197	0.0480843
molecular_function	GO:0004602	glutathione peroxidase activity	19	5	5.142	0.00221769	0.0560554
molecular_function	GO:0005328	neurotransmitter:sodium symporter activity	19	5	5.142	0.00221769	0.0560554
molecular_function	GO:0004112	cyclic-nucleotide phosphodiesterase activity	6	3	9.77	0.00237993	0.0560554
molecular_function	GO:0071813	lipoprotein particle binding	6	3	9.77	0.00237993	0.0560554
molecular_function	GO:0005496	steroid binding	47	8	3.326	0.00243593	0.0560554
molecular_function	GO:0001605	adrenomedullin receptor activity	2	2	19.539	0.00261728	0.0560554
molecular_function	GO:0003989	acetyl-CoA carboxylase activity	2	2	19.539	0.00261728	0.0560554
molecular_function	GO:0004314	[acyl-carrier-protein] S-malonyltransferase activity	2	2	19.539	0.00261728	0.0560554
molecular_function	GO:0004368	glycerol-3-phosphate dehydrogenase activity	2	2	19.539	0.00261728	0.0560554
molecular_function	GO:0004509	steroid 21-monooxygenase activity	2	2	19.539	0.00261728	0.0560554
molecular_function	GO:0004738	pyruvate dehydrogenase activity	2	2	19.539	0.00261728	0.0560554
molecular_function	GO:0004775	succinate-CoA ligase (ADP-forming) activity	2	2	19.539	0.00261728	0.0560554
molecular_function	GO:0030883	endogenous lipid antigen binding	2	2	19.539	0.00261728	0.0560554
molecular_function	GO:0030884	exogenous lipid antigen binding	2	2	19.539	0.00261728	0.0560554
molecular_function	GO:0031177	phosphopantetheine binding	2	2	19.539	0.00261728	0.0560554
molecular_function	GO:0045155	electron transporter, transferring electrons from CoQH2-cytochrome c reductase complex and cytochrome c oxidase complex activity	2	2	19.539	0.00261728	0.0560554
molecular_function	GO:0045550	geranylgeranyl reductase activity	2	2	19.539	0.00261728	0.0560554
molecular_function	GO:0046592	polyamine oxidase activity	2	2	19.539	0.00261728	0.0560554
molecular_function	GO:0047025	3-oxoacyl-[acyl-carrier-protein] reductase (NADH) activity	2	2	19.539	0.00261728	0.0560554
molecular_function	GO:0052901	spermine:oxygen oxidoreductase (spermidine-forming) activity	2	2	19.539	0.00261728	0.0560554
molecular_function	GO:0048038	quinone binding	13	4	6.012	0.00336483	0.0696977
molecular_function	GO:0008144	drug binding	108	13	2.352	0.00349415	0.0720382
molecular_function	GO:0005272	sodium channel activity	30	6	3.908	0.00365716	0.0750483
molecular_function	GO:0015280	ligand-gated sodium channel activity	7	3	8.374	0.00400665	0.0792705
molecular_function	GO:0016208	AMP binding	14	4	5.583	0.0045216	0.0863606
molecular_function	GO:0005102	receptor binding	398	33	1.62	0.00459377	0.0871899
molecular_function	GO:0005215	transporter activity	178	18	1.976	0.00460455	0.0871899
molecular_function	GO:0031957	very long-chain fatty acid-CoA ligase activity	8	3	7.327	0.00616774	0.11107
molecular_function	GO:0003707	steroid hormone receptor activity	55	8	2.842	0.00658365	0.1176
molecular_function	GO:0035240	dopamine binding	16	4	4.885	0.00757595	0.117824
molecular_function	GO:0004466	long-chain-acyl-CoA dehydrogenase activity	3	2	13.026	0.00758434	0.117824
molecular_function	GO:0004500	dopamine beta-monooxygenase activity	3	2	13.026	0.00758434	0.117824
molecular_function	GO:0004739	pyruvate dehydrogenase (acetyl-transferring) activity	3	2	13.026	0.00758434	0.117824
molecular_function	GO:0005332	gamma-aminobutyric acid:sodium symporter activity	3	2	13.026	0.00758434	0.117824
molecular_function	GO:0016509	long-chain-3-hydroxyacyl-CoA dehydrogenase activity	3	2	13.026	0.00758434	0.117824
molecular_function	GO:0016615	malate dehydrogenase activity	3	2	13.026	0.00758434	0.117824
molecular_function	GO:0017077	oxidative phosphorylation uncoupler activity	3	2	13.026	0.00758434	0.117824
molecular_function	GO:0022850	serotonin-gated cation-selective channel activity	3	2	13.026	0.00758434	0.117824
molecular_function	GO:0030060	L-malate dehydrogenase activity	3	2	13.026	0.00758434	0.117824
molecular_function	GO:0030228	lipoprotein particle receptor activity	3	2	13.026	0.00758434	0.117824
molecular_function	GO:0030348	syntaxin-3 binding	3	2	13.026	0.00758434	0.117824
molecular_function	GO:0036042	long-chain fatty acyl-CoA binding	3	2	13.026	0.00758434	0.117824
molecular_function	GO:0042171	lysophosphatidic acid acyltransferase activity	3	2	13.026	0.00758434	0.117824
molecular_function	GO:0050252	retinol O-fatty-acyltransferase activity	3	2	13.026	0.00758434	0.117824
molecular_function	GO:0050833	pyruvate transmembrane transporter activity	3	2	13.026	0.00758434	0.117824
molecular_function	GO:0005504	fatty acid binding	25	5	3.908	0.00785478	0.120717
molecular_function	GO:0016209	antioxidant activity	25	5	3.908	0.00785478	0.120717
molecular_function	GO:0019900	kinase binding	93	11	2.311	0.00787999	0.120717
molecular_function	GO:0020037	heme binding	119	13	2.135	0.00793137	0.121084
molecular_function	GO:0003841	1-acylglycerol-3-phosphate O-acyltransferase activity	9	3	6.513	0.00890205	0.130919
molecular_function	GO:0008430	selenium binding	9	3	6.513	0.00890205	0.130919
molecular_function	GO:0048037	cofactor binding	17	4	4.597	0.00951151	0.138956

## Sheet: Up CIH12W vs CIH8W+Nor4W
Catergory	GO_ID	GO_Name	Population_mapped_id	Study_mapped_id	Enrichment	P_value	FDR
biological_process	GO:0006457	protein folding	113	22	7.261	2.78977e-13	2.31551e-10
biological_process	GO:0015031	protein transport	579	43	2.77	2.09273e-09	5.78988e-07
biological_process	GO:0061077	chaperone-mediated protein folding	43	11	9.541	1.24745e-08	3.18579e-06
biological_process	GO:0071353	cellular response to interleukin-4	23	7	11.351	1.62633e-06	0.000299967
biological_process	GO:0006397	mRNA processing	313	24	2.86	4.53315e-06	0.000744686
biological_process	GO:0006986	response to unfolded protein	49	9	6.85	5.33754e-06	0.000795804
biological_process	GO:0032259	methylation	161	16	3.707	7.32771e-06	0.000977164
biological_process	GO:2000323	negative regulation of glucocorticoid receptor signaling pathway	6	4	24.865	7.35817e-06	0.000977164
biological_process	GO:0098609	cell-cell adhesion	185	17	3.427	1.09333e-05	0.00134439
biological_process	GO:0051775	response to redox state	7	4	21.312	1.68036e-05	0.0018596
biological_process	GO:0006342	chromatin silencing	58	9	5.787	2.23227e-05	0.00225827
biological_process	GO:0006458	'de novo' protein folding	14	5	13.32	2.23424e-05	0.00225827
biological_process	GO:0006950	response to stress	33	7	7.911	2.24467e-05	0.00225827
biological_process	GO:0006364	rRNA processing	123	13	3.942	2.7072e-05	0.00250298
biological_process	GO:1904871	positive regulation of protein localization to Cajal body	8	4	18.648	3.28926e-05	0.00288132
biological_process	GO:1901998	toxin transport	35	7	7.459	3.37267e-05	0.00288132
biological_process	GO:0034976	response to endoplasmic reticulum stress	67	9	5.01	7.23565e-05	0.0053383
biological_process	GO:0042307	positive regulation of protein import into nucleus	19	5	9.815	0.000116096	0.00786608
biological_process	GO:0006139	nucleobase-containing compound metabolic process	31	6	7.219	0.000150827	0.00981854
biological_process	GO:0051726	regulation of cell cycle	108	11	3.799	0.000155004	0.00989643
biological_process	GO:0006418	tRNA aminoacylation for protein translation	33	6	6.781	0.000216791	0.0130863
biological_process	GO:0008380	RNA splicing	238	17	2.664	0.000254602	0.0149883
biological_process	GO:0007017	microtubule-based process	34	6	6.582	0.000257329	0.0149883
biological_process	GO:0031053	primary miRNA processing	6	3	18.648	0.000361197	0.0193415
biological_process	GO:0000398	mRNA splicing, via spliceosome	102	10	3.657	0.000416645	0.0216135
biological_process	GO:0008285	negative regulation of cell proliferation	368	22	2.23	0.000429505	0.0219378
biological_process	GO:1904874	positive regulation of telomerase RNA localization to Cajal body	15	4	9.946	0.000552113	0.0269561
biological_process	GO:0046599	regulation of centriole replication	7	3	15.984	0.000619492	0.0293816
biological_process	GO:0000077	DNA damage checkpoint	27	5	6.907	0.000675017	0.0302839
biological_process	GO:0006423	cysteinyl-tRNA aminoacylation	2	2	37.297	0.000717801	0.0302839
biological_process	GO:0017126	nucleologenesis	2	2	37.297	0.000717801	0.0302839
biological_process	GO:0071929	alpha-tubulin acetylation	2	2	37.297	0.000717801	0.0302839
biological_process	GO:0030970	retrograde protein transport, ER to cytosol	16	4	9.324	0.000720611	0.0302839
biological_process	GO:0042254	ribosome biogenesis	73	8	4.087	0.00074208	0.0307963
biological_process	GO:0046325	negative regulation of glucose import	17	4	8.776	0.000922462	0.0364592
biological_process	GO:1902236	negative regulation of endoplasmic reticulum stress-induced intrinsic apoptotic signaling pathway	17	4	8.776	0.000922462	0.0364592
biological_process	GO:0001666	response to hypoxia	113	10	3.301	0.00093467	0.0365071
biological_process	GO:0061299	retina vasculature morphogenesis in camera-type eye	8	3	13.986	0.000971451	0.0375025
biological_process	GO:0051290	protein heterotetramerization	44	6	5.086	0.00107669	0.0405267
biological_process	GO:0030433	ER-associated ubiquitin-dependent protein catabolic process	60	7	4.351	0.00108641	0.0405267
biological_process	GO:0071897	DNA biosynthetic process	18	4	8.288	0.00116103	0.0428292
biological_process	GO:0006606	protein import into nucleus	61	7	4.28	0.00119933	0.0433305
biological_process	GO:0007264	small GTPase mediated signal transduction	226	15	2.475	0.00121729	0.043456
biological_process	GO:0000012	single strand break repair	9	3	12.432	0.0014282	0.0473242
biological_process	GO:0042026	protein refolding	9	3	12.432	0.0014282	0.0473242
biological_process	GO:0045943	positive regulation of transcription from RNA polymerase I promoter	9	3	12.432	0.0014282	0.0473242
biological_process	GO:1904851	positive regulation of establishment of protein localization to telomere	9	3	12.432	0.0014282	0.0473242
biological_process	GO:0035556	intracellular signal transduction	405	22	2.026	0.00149986	0.0476769
biological_process	GO:0051973	positive regulation of telomerase activity	32	5	5.828	0.00150785	0.0476769
biological_process	GO:0006417	regulation of translation	121	10	3.082	0.00157516	0.0491743
biological_process	GO:0030036	actin cytoskeleton organization	142	11	2.889	0.00158483	0.0491743
biological_process	GO:0043066	negative regulation of apoptotic process	488	25	1.911	0.00166729	0.0512538
biological_process	GO:0006406	mRNA export from nucleus	34	5	5.485	0.00199376	0.0561385
biological_process	GO:0035646	endosome to melanosome transport	10	3	11.189	0.00199978	0.0561385
biological_process	GO:0018107	peptidyl-threonine phosphorylation	67	7	3.897	0.00208298	0.0561385
biological_process	GO:0031440	regulation of mRNA 3'-end processing	3	2	24.865	0.00211503	0.0561385
biological_process	GO:0044154	histone H3-K14 acetylation	3	2	24.865	0.00211503	0.0561385
biological_process	GO:1904100	positive regulation of protein O-linked glycosylation	3	2	24.865	0.00211503	0.0561385
biological_process	GO:1905323	telomerase holoenzyme complex assembly	3	2	24.865	0.00211503	0.0561385
biological_process	GO:2000074	regulation of type B pancreatic cell development	3	2	24.865	0.00211503	0.0561385
biological_process	GO:0006891	intra-Golgi vesicle-mediated transport	22	4	6.781	0.00254935	0.0656113
biological_process	GO:0035329	hippo signaling	22	4	6.781	0.00254935	0.0656113
biological_process	GO:0006897	endocytosis	174	12	2.572	0.00264937	0.0672779
biological_process	GO:0071712	ER-associated misfolded protein catabolic process	11	3	10.172	0.00269517	0.0672779
biological_process	GO:0031047	gene silencing by RNA	53	6	4.222	0.00285839	0.0702952
biological_process	GO:0050821	protein stabilization	132	10	2.826	0.00299402	0.0730893
biological_process	GO:0045070	positive regulation of viral genome replication	23	4	6.486	0.00302134	0.073218
biological_process	GO:0048666	neuron development	54	6	4.144	0.00314418	0.075155
biological_process	GO:0006396	RNA processing	72	7	3.626	0.00314655	0.075155
biological_process	GO:0043039	tRNA aminoacylation	12	3	9.324	0.0035224	0.0817787
biological_process	GO:0006490	oligosaccharide-lipid intermediate biosynthetic process	4	2	18.648	0.00415484	0.0851486
biological_process	GO:0006987	activation of signaling protein activity involved in unfolded protein response	4	2	18.648	0.00415484	0.0851486
biological_process	GO:0032615	interleukin-12 production	4	2	18.648	0.00415484	0.0851486
biological_process	GO:0061448	connective tissue development	4	2	18.648	0.00415484	0.0851486
biological_process	GO:0065002	intracellular protein transmembrane transport	4	2	18.648	0.00415484	0.0851486
biological_process	GO:0070475	rRNA base methylation	4	2	18.648	0.00415484	0.0851486
biological_process	GO:0090403	oxidative stress-induced premature senescence	4	2	18.648	0.00415484	0.0851486
biological_process	GO:1902742	apoptotic process involved in development	4	2	18.648	0.00415484	0.0851486
biological_process	GO:1904385	cellular response to angiotensin	4	2	18.648	0.00415484	0.0851486
biological_process	GO:0001934	positive regulation of protein phosphorylation	185	12	2.419	0.00435002	0.0880614
biological_process	GO:0003334	keratinocyte development	13	3	8.607	0.00448857	0.0881778
biological_process	GO:0051085	chaperone mediated protein folding requiring cofactor	13	3	8.607	0.00448857	0.0881778
biological_process	GO:0070935	3'-UTR-mediated mRNA stabilization	13	3	8.607	0.00448857	0.0881778
biological_process	GO:0060548	negative regulation of cell death	78	7	3.347	0.0049202	0.0960886
biological_process	GO:0010976	positive regulation of neuron projection development	142	10	2.627	0.00503274	0.0977117
biological_process	GO:0000462	maturation of SSU-rRNA from tricistronic rRNA transcript (SSU-rRNA, 5.8S rRNA, LSU-rRNA)	27	4	5.525	0.00550252	0.104448
biological_process	GO:0001825	blastocyst formation	14	3	7.992	0.00559992	0.104448
biological_process	GO:0008610	lipid biosynthetic process	14	3	7.992	0.00559992	0.104448
biological_process	GO:0048246	macrophage chemotaxis	14	3	7.992	0.00559992	0.104448
biological_process	GO:0032868	response to insulin	44	5	4.238	0.00624975	0.115917
biological_process	GO:0006378	mRNA polyadenylation	28	4	5.328	0.00628564	0.115933
biological_process	GO:0051028	mRNA transport	82	7	3.184	0.00646336	0.115933
biological_process	GO:0045454	cell redox homeostasis	63	6	3.552	0.00676016	0.115933
biological_process	GO:0006085	acetyl-CoA biosynthetic process	5	2	14.919	0.00680188	0.115933
biological_process	GO:0006287	base-excision repair, gap-filling	5	2	14.919	0.00680188	0.115933
biological_process	GO:0035948	positive regulation of gluconeogenesis by positive regulation of transcription from RNA polymerase II promoter	5	2	14.919	0.00680188	0.115933
biological_process	GO:0045345	positive regulation of MHC class I biosynthetic process	5	2	14.919	0.00680188	0.115933
biological_process	GO:0046605	regulation of centrosome cycle	5	2	14.919	0.00680188	0.115933
biological_process	GO:0090330	regulation of platelet aggregation	5	2	14.919	0.00680188	0.115933
biological_process	GO:1900103	positive regulation of endoplasmic reticulum unfolded protein response	5	2	14.919	0.00680188	0.115933
biological_process	GO:0006401	RNA catabolic process	15	3	7.459	0.00686187	0.115933
biological_process	GO:0030968	endoplasmic reticulum unfolded protein response	45	5	4.144	0.00687915	0.115933
biological_process	GO:0006886	intracellular protein transport	221	13	2.194	0.00691789	0.115975
biological_process	GO:0018279	protein N-linked glycosylation via asparagine	29	4	5.144	0.00713934	0.118513
biological_process	GO:0001933	negative regulation of protein phosphorylation	85	7	3.071	0.00783778	0.12946
biological_process	GO:0050766	positive regulation of phagocytosis	47	5	3.968	0.00826834	0.132785
biological_process	GO:0001833	inner cell mass cell proliferation	16	3	6.993	0.00827908	0.132785
biological_process	GO:0006405	RNA export from nucleus	16	3	6.993	0.00827908	0.132785
biological_process	GO:0000186	activation of MAPKK activity	31	4	4.812	0.00906844	0.142688
biological_process	GO:0006335	DNA replication-dependent nucleosome assembly	31	4	4.812	0.00906844	0.142688
biological_process	GO:0032212	positive regulation of telomere maintenance via telomerase	31	4	4.812	0.00906844	0.142688
biological_process	GO:0006334	nucleosome assembly	88	7	2.967	0.0094166	0.1453
biological_process	GO:0006164	purine nucleotide biosynthetic process	17	3	6.582	0.0098555	0.1453
cellular_component	GO:0005634	nucleus	5677	262	1.721	1.97456e-22	6.55554e-19
cellular_component	GO:0005829	cytosol	2743	157	2.135	7.94412e-21	1.31872e-17
cellular_component	GO:0005783	endoplasmic reticulum	1328	83	2.331	5.49091e-13	3.64596e-10
cellular_component	GO:0005737	cytoplasm	5599	224	1.492	1.70157e-11	7.0615e-09
cellular_component	GO:0005654	nucleoplasm	1806	95	1.962	1.73237e-10	6.39052e-08
cellular_component	GO:0005730	nucleolus	695	45	2.415	5.57121e-08	1.32117e-05
cellular_component	GO:0034663	endoplasmic reticulum chaperone complex	12	6	18.648	2.92319e-07	6.46999e-05
cellular_component	GO:0005874	microtubule	315	26	3.078	4.56307e-07	9.46836e-05
cellular_component	GO:0005790	smooth endoplasmic reticulum	28	8	10.656	4.94698e-07	9.66115e-05
cellular_component	GO:0070062	extracellular exosome	2588	108	1.556	2.0164e-06	0.000352339
cellular_component	GO:0005643	nuclear pore	61	10	6.114	4.71036e-06	0.000744686
cellular_component	GO:0005832	chaperonin-containing T-complex	11	5	16.953	5.5131e-06	0.000795804
cellular_component	GO:0005788	endoplasmic reticulum lumen	46	8	6.486	2.71407e-05	0.00250298
cellular_component	GO:0000228	nuclear chromosome	49	8	6.089	4.37076e-05	0.00345498
cellular_component	GO:0015630	microtubule cytoskeleton	157	14	3.326	8.90027e-05	0.00642367
cellular_component	GO:0043231	intracellular membrane-bounded organelle	791	40	1.886	0.000104134	0.00735583
cellular_component	GO:0032040	small-subunit processome	33	6	6.781	0.000216791	0.0130863
cellular_component	GO:0005768	endosome	557	30	2.009	0.00026393	0.0151077
cellular_component	GO:0005856	cytoskeleton	1115	50	1.673	0.000282981	0.0159237
cellular_component	GO:0016020	membrane	6929	226	1.216	0.000290916	0.0160974
cellular_component	GO:0002199	zona pellucida receptor complex	13	4	11.476	0.000301829	0.0164274
cellular_component	GO:0005913	cell-cell adherens junction	317	20	2.353	0.000391281	0.0206199
cellular_component	GO:0000790	nuclear chromatin	227	16	2.629	0.000443255	0.0222971
cellular_component	GO:0005769	early endosome	186	14	2.807	0.000517934	0.0256648
cellular_component	GO:0043209	myelin sheath	188	14	2.777	0.000576162	0.0277226
cellular_component	GO:0005881	cytoplasmic microtubule	55	7	4.747	0.000640514	0.0295348
cellular_component	GO:0005681	spliceosomal complex	134	11	3.062	0.000989556	0.0377624
cellular_component	GO:0005694	chromosome	347	20	2.15	0.00120072	0.0433305
cellular_component	GO:0010008	endosome membrane	62	7	4.211	0.00132124	0.0466652
cellular_component	GO:0043234	protein complex	616	30	1.816	0.00133763	0.0467465
cellular_component	GO:0008250	oligosaccharyltransferase complex	9	3	12.432	0.0014282	0.0473242
cellular_component	GO:0000776	kinetochore	120	10	3.108	0.00147967	0.0476769
cellular_component	GO:0035861	site of double-strand break	32	5	5.828	0.00150785	0.0476769
cellular_component	GO:0000839	Hrd1p ubiquitin ligase ERAD-L complex	3	2	24.865	0.00211503	0.0561385
cellular_component	GO:0016222	procollagen-proline 4-dioxygenase complex	3	2	24.865	0.00211503	0.0561385
cellular_component	GO:0044611	nuclear pore inner ring	3	2	24.865	0.00211503	0.0561385
cellular_component	GO:0071001	U4/U6 snRNP	3	2	24.865	0.00211503	0.0561385
cellular_component	GO:0000786	nucleosome	70	7	3.73	0.00268052	0.0672779
cellular_component	GO:0005789	endoplasmic reticulum membrane	251	15	2.229	0.0033565	0.079597
cellular_component	GO:0000974	Prp19 complex	12	3	9.324	0.0035224	0.0817787
cellular_component	GO:0097512	cardiac myofibril	4	2	18.648	0.00415484	0.0851486
cellular_component	GO:1990904	ribonucleoprotein complex	4	2	18.648	0.00415484	0.0851486
cellular_component	GO:0005622	intracellular	783	34	1.62	0.00425908	0.0867493
cellular_component	GO:0000784	nuclear chromosome, telomeric region	121	9	2.774	0.00535459	0.103356
cellular_component	GO:0033276	transcription factor TFTC complex	14	3	7.992	0.00559992	0.104448
cellular_component	GO:0033391	chromatoid body	14	3	7.992	0.00559992	0.104448
cellular_component	GO:0097165	nuclear stress granule	5	2	14.919	0.00680188	0.115933
cellular_component	GO:0005662	DNA replication factor A complex	15	3	7.459	0.00686187	0.115933
cellular_component	GO:0005774	vacuolar membrane	15	3	7.459	0.00686187	0.115933
cellular_component	GO:0005623	cell	129	9	2.602	0.0080597	0.132466
cellular_component	GO:0005776	autophagosome	48	5	3.885	0.00903093	0.142688
cellular_component	GO:0005793	endoplasmic reticulum-Golgi intermediate compartment	49	5	3.806	0.00984067	0.1453
cellular_component	GO:0072686	mitotic spindle	49	5	3.806	0.00984067	0.1453
cellular_component	GO:0000178	exosome (RNase complex)	17	3	6.582	0.0098555	0.1453
molecular_function	GO:0003723	RNA binding	1404	98	2.603	2.23776e-18	2.47646e-15
molecular_function	GO:0000166	nucleotide binding	1862	102	2.043	3.02385e-12	1.45382e-09
molecular_function	GO:0051082	unfolded protein binding	80	18	8.392	3.06528e-12	1.45382e-09
molecular_function	GO:0016740	transferase activity	1482	81	2.038	7.97829e-10	2.64879e-07
molecular_function	GO:0005524	ATP binding	1371	76	2.068	1.51894e-09	4.58444e-07
molecular_function	GO:0008168	methyltransferase activity	162	16	3.684	7.9325e-06	0.00101292
molecular_function	GO:0005515	protein binding	4545	165	1.354	1.38013e-05	0.00163643
molecular_function	GO:0000030	mannosyltransferase activity	13	5	14.345	1.4687e-05	0.00168141
molecular_function	GO:0003729	mRNA binding	139	14	3.757	2.32043e-05	0.00226583
molecular_function	GO:0008565	protein transporter activity	61	9	5.503	3.38468e-05	0.00288132
molecular_function	GO:0016757	transferase activity, transferring glycosyl groups	204	17	3.108	3.87413e-05	0.00321553
molecular_function	GO:0044183	protein binding involved in protein folding	25	6	8.951	4.15975e-05	0.00336839
molecular_function	GO:0004812	aminoacyl-tRNA ligase activity	38	7	6.87	5.90346e-05	0.00455802
molecular_function	GO:0098641	cadherin binding involved in cell-cell adhesion	277	20	2.693	6.48635e-05	0.00489424
molecular_function	GO:0008408	3'-5' exonuclease activity	19	5	9.815	0.000116096	0.00786608
molecular_function	GO:0019899	enzyme binding	388	24	2.307	0.000144455	0.00959182
molecular_function	GO:0004169	dolichyl-phosphate-mannose-protein mannosyltransferase activity	5	3	22.378	0.000184278	0.0115434
molecular_function	GO:0031072	heat shock protein binding	55	7	4.747	0.000640514	0.0295348
molecular_function	GO:0002135	CTP binding	2	2	37.297	0.000717801	0.0302839
molecular_function	GO:0004817	cysteine-tRNA ligase activity	2	2	37.297	0.000717801	0.0302839
molecular_function	GO:0042826	histone deacetylase binding	112	10	3.33	0.000872453	0.0357598
molecular_function	GO:0016779	nucleotidyltransferase activity	75	8	3.978	0.000888893	0.0359893
molecular_function	GO:0003756	protein disulfide isomerase activity	19	4	7.852	0.00143968	0.0473242
molecular_function	GO:0003899	DNA-directed 5'-3' RNA polymerase activity	33	5	5.651	0.0017384	0.0526919
molecular_function	GO:0003725	double-stranded RNA binding	65	7	4.017	0.00174582	0.0526919
molecular_function	GO:0031418	L-ascorbic acid binding	20	4	7.459	0.00176175	0.0526939
molecular_function	GO:0008641	small protein activating enzyme activity	10	3	11.189	0.00199978	0.0561385
molecular_function	GO:0017098	sulfonylurea receptor binding	3	2	24.865	0.00211503	0.0561385
molecular_function	GO:0030515	snoRNA binding	21	4	7.104	0.00213056	0.0561385
molecular_function	GO:0005525	GTP binding	340	19	2.084	0.0022324	0.0583588
molecular_function	GO:0034450	ubiquitin-ubiquitin ligase activity	11	3	10.172	0.00269517	0.0672779
molecular_function	GO:0016853	isomerase activity	110	9	3.052	0.00284713	0.0702952
molecular_function	GO:0035925	mRNA 3'-UTR AU-rich region binding	12	3	9.324	0.0035224	0.0817787
molecular_function	GO:0004364	glutathione transferase activity	25	4	5.967	0.00413733	0.0851486
molecular_function	GO:0002134	UTP binding	4	2	18.648	0.00415484	0.0851486
molecular_function	GO:0004656	procollagen-proline 4-dioxygenase activity	4	2	18.648	0.00415484	0.0851486
molecular_function	GO:0008310	single-stranded DNA 3'-5' exodeoxyribonuclease activity	4	2	18.648	0.00415484	0.0851486
molecular_function	GO:0019834	phospholipase A2 inhibitor activity	4	2	18.648	0.00415484	0.0851486
molecular_function	GO:0031727	CCR2 chemokine receptor binding	4	2	18.648	0.00415484	0.0851486
molecular_function	GO:0032564	dATP binding	4	2	18.648	0.00415484	0.0851486
molecular_function	GO:0052650	NADP-retinol dehydrogenase activity	4	2	18.648	0.00415484	0.0851486
molecular_function	GO:0019901	protein kinase binding	443	22	1.852	0.0044391	0.0881778
molecular_function	GO:0048156	tau protein binding	13	3	8.607	0.00448857	0.0881778
molecular_function	GO:0004859	phospholipase inhibitor activity	5	2	14.919	0.00680188	0.115933
molecular_function	GO:0030621	U4 snRNA binding	5	2	14.919	0.00680188	0.115933
molecular_function	GO:0023026	MHC class II protein complex binding	15	3	7.459	0.00686187	0.115933
molecular_function	GO:0046872	metal ion binding	2937	100	1.27	0.00695149	0.115975
molecular_function	GO:0000049	tRNA binding	47	5	3.968	0.00826834	0.132785
molecular_function	GO:0070182	DNA polymerase binding	16	3	6.993	0.00827908	0.132785
molecular_function	GO:0005487	nucleocytoplasmic transporter activity	17	3	6.582	0.0098555	0.1453
molecular_function	GO:0017056	structural constituent of nuclear pore	17	3	6.582	0.0098555	0.1453

## Sheet: Down CIH12W vs CIH8W+Nor4W
Catergory	GO_ID	GO_Name	Population_mapped_id	Study_mapped_id	Enrichment	P_value	FDR
biological_process	GO:0007186	G-protein coupled receptor signaling pathway	1681	110	2.441	1.59982e-18	3.89875e-15
biological_process	GO:0007608	sensory perception of smell	1140	84	2.748	3.46901e-17	2.81799e-14
biological_process	GO:0048511	rhythmic process	127	13	3.818	3.80302e-05	0.011585
biological_process	GO:0021555	midbrain-hindbrain boundary morphogenesis	4	3	27.973	7.52147e-05	0.0183298
biological_process	GO:0007165	signal transduction	1243	56	1.68	0.00010859	0.0220528
biological_process	GO:0034765	regulation of ion transmembrane transport	134	12	3.34	0.000268001	0.04082
biological_process	GO:0050896	response to stimulus	210	15	2.664	0.000575998	0.0669796
biological_process	GO:0021557	oculomotor nerve development	2	2	37.297	0.000717801	0.0669796
biological_process	GO:0021558	trochlear nerve development	2	2	37.297	0.000717801	0.0669796
biological_process	GO:0070315	G1 to G0 transition involved in cell differentiation	2	2	37.297	0.000717801	0.0669796
biological_process	GO:1903426	regulation of reactive oxygen species biosynthetic process	2	2	37.297	0.000717801	0.0669796
biological_process	GO:0007623	circadian rhythm	73	8	4.087	0.00074208	0.0669796
biological_process	GO:0050911	detection of chemical stimulus involved in sensory perception of smell	44	6	5.086	0.00107669	0.0874628
biological_process	GO:0098656	anion transmembrane transport	18	4	8.288	0.00116103	0.0912721
biological_process	GO:0014050	negative regulation of glutamate secretion	9	3	12.432	0.0014282	0.105471
biological_process	GO:0007275	multicellular organism development	1024	44	1.603	0.0015129	0.108439
biological_process	GO:0006556	S-adenosylmethionine biosynthetic process	3	2	24.865	0.00211503	0.122722
biological_process	GO:0007529	establishment of synaptic specificity at neuromuscular junction	3	2	24.865	0.00211503	0.122722
biological_process	GO:0032651	regulation of interleukin-1 beta production	3	2	24.865	0.00211503	0.122722
biological_process	GO:0060675	ureteric bud morphogenesis	3	2	24.865	0.00211503	0.122722
biological_process	GO:0070838	divalent metal ion transport	3	2	24.865	0.00211503	0.122722
biological_process	GO:0072012	glomerulus vasculature development	3	2	24.865	0.00211503	0.122722
biological_process	GO:0030154	cell differentiation	786	35	1.661	0.00252455	0.141199
biological_process	GO:0061179	negative regulation of insulin secretion involved in cellular response to glucose stimulus	11	3	10.172	0.00269517	0.145958
biological_process	GO:0018393	internal peptidyl-lysine acetylation	4	2	18.648	0.00415484	0.187506
biological_process	GO:0021575	hindbrain morphogenesis	4	2	18.648	0.00415484	0.187506
biological_process	GO:0060164	regulation of timing of neuron differentiation	4	2	18.648	0.00415484	0.187506
biological_process	GO:0070294	renal sodium ion absorption	4	2	18.648	0.00415484	0.187506
biological_process	GO:0070859	positive regulation of bile acid biosynthetic process	4	2	18.648	0.00415484	0.187506
biological_process	GO:0072049	comma-shaped body morphogenesis	4	2	18.648	0.00415484	0.187506
biological_process	GO:0097167	circadian regulation of translation	4	2	18.648	0.00415484	0.187506
biological_process	GO:0006351	transcription, DNA-templated	1838	68	1.38	0.00432712	0.191731
biological_process	GO:0050907	detection of chemical stimulus involved in sensory perception	211	13	2.298	0.00473358	0.205995
biological_process	GO:0032922	circadian regulation of gene expression	60	6	3.73	0.00532697	0.227751
biological_process	GO:0048715	negative regulation of oligodendrocyte differentiation	14	3	7.992	0.00559992	0.233865
biological_process	GO:0048706	embryonic skeletal system development	43	5	4.337	0.0056619	0.233865
biological_process	GO:0045892	negative regulation of transcription, DNA-templated	481	23	1.783	0.00576637	0.234211
biological_process	GO:0003231	cardiac ventricle development	5	2	14.919	0.00680188	0.242964
biological_process	GO:0021521	ventral spinal cord interneuron specification	5	2	14.919	0.00680188	0.242964
biological_process	GO:0071286	cellular response to magnesium ion	5	2	14.919	0.00680188	0.242964
biological_process	GO:0072050	S-shaped body morphogenesis	5	2	14.919	0.00680188	0.242964
biological_process	GO:0089711	L-glutamate transmembrane transport	5	2	14.919	0.00680188	0.242964
biological_process	GO:0007340	acrosome reaction	15	3	7.459	0.00686187	0.242964
biological_process	GO:0071277	cellular response to calcium ion	45	5	4.144	0.00687915	0.242964
biological_process	GO:0009416	response to light stimulus	16	3	6.993	0.00827908	0.279234
biological_process	GO:0070588	calcium ion transmembrane transport	87	7	3.001	0.00886661	0.279234
biological_process	GO:0051281	positive regulation of release of sequestered calcium ion into cytosol	31	4	4.812	0.00906844	0.279234
cellular_component	GO:0016021	integral component of membrane	5298	212	1.492	8.46225e-11	5.15562e-08
cellular_component	GO:0048269	methionine adenosyltransferase complex	2	2	37.297	0.000717801	0.0669796
cellular_component	GO:0031094	platelet dense tubular network	3	2	24.865	0.00211503	0.122722
cellular_component	GO:0031674	I band	22	4	6.781	0.00254935	0.141199
cellular_component	GO:0005576	extracellular region	1634	62	1.415	0.00368363	0.187506
cellular_component	GO:0005587	collagen type IV trimer	6	2	12.432	0.0100222	0.279234
cellular_component	GO:0036126	sperm flagellum	39	4	3.825	0.0200511	0.279234
cellular_component	GO:0005891	voltage-gated calcium channel complex	22	3	5.086	0.0202189	0.279234
cellular_component	GO:0005929	cilium	255	13	1.901	0.0207299	0.279234
cellular_component	GO:0005882	intermediate filament	108	7	2.417	0.0263306	0.279234
molecular_function	GO:0004984	olfactory receptor activity	1114	84	2.812	8.72508e-18	1.06315e-14
molecular_function	GO:0005549	odorant binding	366	26	2.649	7.32075e-06	0.00356813
molecular_function	GO:0032795	heterotrimeric G-protein binding	7	4	21.312	1.68036e-05	0.00682508
molecular_function	GO:0008227	G-protein coupled amine receptor activity	15	5	12.432	3.27746e-05	0.0114102
molecular_function	GO:0001594	trace-amine receptor activity	16	5	11.655	4.66216e-05	0.0126241
molecular_function	GO:0004930	G-protein coupled receptor activity	477	28	2.189	0.00010251	0.0220528
molecular_function	GO:0043565	sequence-specific DNA binding	589	32	2.026	0.000142463	0.0267062
molecular_function	GO:0070888	E-box binding	34	6	6.582	0.000257329	0.04082
molecular_function	GO:0005244	voltage-gated ion channel activity	134	12	3.34	0.000268001	0.04082
molecular_function	GO:0004871	signal transducer activity	654	33	1.882	0.000428037	0.0613604
molecular_function	GO:0001605	adrenomedullin receptor activity	2	2	37.297	0.000717801	0.0669796
molecular_function	GO:0004947	bradykinin receptor activity	2	2	37.297	0.000717801	0.0669796
molecular_function	GO:0071820	N-box binding	2	2	37.297	0.000717801	0.0669796
molecular_function	GO:0003677	DNA binding	1723	68	1.472	0.000889365	0.0766259
molecular_function	GO:0000977	RNA polymerase II regulatory region sequence-specific DNA binding	197	14	2.651	0.000911838	0.0766259
molecular_function	GO:0031432	titin binding	9	3	12.432	0.0014282	0.105471
molecular_function	GO:0036041	long-chain fatty acid binding	3	2	24.865	0.00211503	0.122722
molecular_function	GO:0001883	purine nucleoside binding	4	2	18.648	0.00415484	0.187506
molecular_function	GO:0004126	cytidine deaminase activity	5	2	14.919	0.00680188	0.242964
molecular_function	GO:0016814	hydrolase activity, acting on carbon-nitrogen (but not peptide) bonds, in cyclic amidines	5	2	14.919	0.00680188	0.242964
