# Supplementary material for: Potential Role of mRNAs and LncRNAs in Chronic Intermittent Hypoxia Exposure-Aggravated Atherosclerosis
Source: Front Genet. 2020 Apr 9;11:290. doi: 10.3389/fgene.2020.00290 (PMC7160761; doi:10.3389/fgene.2020.00290)
Supplement: Supplementary file 8 [file Table_7.XLSX]

## Sheet: CIH8W vs Nor8W
Supplementary Table S7 The overlap of lncRNA co-localized mRNAs and differentially expressed mRNAs
probe_set	Fold Change	Regulation	P.Value	adj.P.Val	Gene.Symbol	Gene_ID	Gene_Discription	biotype	Chromosome	Strand	Public.Gene.IDs	Start	Stop
TC0100000632.mm.1	1.54956	up	0.0207477	0.560129	Slc11a1	NM_013612	solute carrier family 11 (proton-coupled divalent metal ion transporters), member 1	protein_coding	chr1	+	NM_013612	74375203	74386062
TC0100003240.mm.1	2.14006	up	0.00356873	0.53309	Prg4	NM_001110146	proteoglycan 4 (megakaryocyte stimulating factor, articular superficial zone protein)	protein_coding	chr1	-	NM_001110146	150449412	150466165
TC0200004599.mm.1	2.08453	up	0.0419326	0.610127	Il1a	NM_010554	interleukin 1 alpha	protein_coding	chr2	-	NM_010554	129299609	129309972
TC0200004826.mm.1	1.13785	up	0.0467469	0.619124	Zfp120	NM_023266	zinc finger protein 120	protein_coding	chr2	-	NM_023266	150114406	150136708
TC0300001041.mm.1	1.25519	up	0.00395985	0.53309	Nras	NM_010937	neuroblastoma ras oncogene	protein_coding	chr3	+	NM_010937	103058285	103067914
TC0300001725.mm.1	1.23932	up	0.0353087	0.595964	Kpna2	ENSMUST00000091289	karyopherin (importin) alpha 2	protein_coding	chr3	-	ENSMUST00000091289	25210764	25212720
TC0300002284.mm.1	1.27066	up	0.0346906	0.595964	Fcrls	NM_030707	Fc receptor-like S, scavenger receptor	protein_coding	chr3	-	NM_030707	87250758	87263738
TC0400001413.mm.1	1.14504	up	0.00968955	0.539983	Rragc	NM_017475	Ras-related GTP binding C	protein_coding	chr4	+	NM_017475	123917433	123936997
TC0400001510.mm.1	1.15686	up	0.0113715	0.546476	Rnf19b	NM_029219	ring finger protein 19B	protein_coding	chr4	+	NM_029219	129058271	129085886
TC0400003490.mm.1	1.15719	up	0.0145922	0.54741	Akirin1	NM_023423	akirin 1	protein_coding	chr4	-	NM_023423	123734559	123750345
TC0600001422.mm.1	1.14077	up	0.0366244	0.597892	C1ra	NM_023143	complement component 1, r subcomponent A	protein_coding	chr6	+	NM_023143	124512405	124523440
TC0600003108.mm.1	1.18581	up	0.0402198	0.602383	C1s1	NM_001097617	complement component 1, s subcomponent 1	protein_coding	chr6	-	NM_001097617	124530344	124542359
TC0600003237.mm.1	2.18044	up	0.00318984	0.53309	Olr1	NM_138648	oxidized low density lipoprotein (lectin-like) receptor 1	protein_coding	chr6	-	NM_138648	129485246	129507165
TC0700000561.mm.1	1.67674	up	0.0215189	0.565233	Tyrobp	NM_011662	TYRO protein tyrosine kinase binding protein	protein_coding	chr7	+	NM_011662	30413788	30417582
TC0700002950.mm.1	1.22171	up	0.0396545	0.602174	Cd33	NM_001111058	CD33 antigen	protein_coding	chr7	-	NM_001111058	43527456	43544428
TC0700003850.mm.1	1.71965	up	0.0173884	0.551814	Il18bp	NM_010531	interleukin 18 binding protein	protein_coding	chr7	-	NM_010531	102015074	102018690
TC0700004351.mm.1	1.15504	up	0.0207093	0.560129	Pycard	NM_023258	PYD and CARD domain containing	protein_coding	chr7	-	NM_023258	127991373	127993867
TC0700004451.mm.1	1.59249	up	0.00758101	0.538479	Mki67	NM_001081117	antigen identified by monoclonal antibody Ki 67	protein_coding	chr7	-	NM_001081117	135689788	135716379
TC0800002593.mm.1	1.11005	up	0.0065796	0.538479	Calr	NM_007591	calreticulin	protein_coding	chr8	-	NM_007591	84841850	84846934
TC0900001402.mm.1	1.11609	up	0.048492	0.624575	Gpx1	NM_008160	glutathione peroxidase 1	protein_coding	chr9	+	NM_008160	108339080	108340344
TC0900001674.mm.1	1.78973	up	0.0248676	0.575093	Ccr2	NM_009915	chemokine (C-C motif) receptor 2	protein_coding	chr9	+	NM_009915	124101950	124113557
TC0X00003437.mm.1	1.60867	up	0.0139191	0.546476	Il2rg	NM_013563	interleukin 2 receptor, gamma chain	protein_coding	chrX	-	NM_013563	101264378	101268255
TC1100001256.mm.1	1.14692	up	0.049117	0.62505	Ccl4	NM_013652	chemokine (C-C motif) ligand 4	protein_coding	chr11	+	NM_013652	83662584	83664683
TC1100002046.mm.1	1.18893	up	0.0385829	0.601316	Hmga1-rs1	NM_001166476	high mobility group AT-hook I, related sequence 1	protein_coding	chr11	+	NM_001166476	120762794	120764419
TC1100003326.mm.1	1.66267	up	0.00523284	0.534517	Evi2a	NM_001033711	ecotropic viral integration site 2a	protein_coding	chr11	-	NM_001033711	79513385	79530609
TC1200000890.mm.1	1.27507	up	0.0202385	0.560129	Gm2016	ENSMUST00000178852	predicted gene 2016	protein_coding	chr12	+	ENSMUST00000178852	88027004	88027438
TC1200001333.mm.1	1.25511	up	0.0117768	0.546476	Gm6768	ENSMUST00000022467	predicted gene 6768	protein_coding	chr12	+	ENSMUST00000022467	119260934	119264275
TC1200002612.mm.1	2.1023	up	0.0162388	0.549889	Ighv1-19	ENSMUST00000103505	immunoglobulin heavy variable V1-19	protein_coding	chr12	-	ENSMUST00000103505	114708648	114709081
TC1200002613.mm.1	1.69016	up	0.0434262	0.613586	Ighv1-20	ENSMUST00000103506	immunoglobulin heavy variable V1-20	protein_coding	chr12	-	ENSMUST00000103506	114723772	114724205
TC1300001722.mm.1	1.34828	up	0.00224759	0.53309	Sox4	NM_009238	SRY (sex determining region Y)-box 4	protein_coding	chr13	-	NM_009238	28948919	28953713
TC1300001762.mm.1	1.43284	up	0.0012052	0.53309	Serpinb1a	NM_025429	serine (or cysteine) peptidase inhibitor, clade B, member 1a	protein_coding	chr13	-	NM_025429	32842092	32851185
TC1300002204.mm.1	1.44797	up	0.0135052	0.546476	Ctsl	NM_009984	cathepsin L	protein_coding	chr13	-	NM_009984	64363214	64370306
TC1300002481.mm.1	1.3351	up	0.0245712	0.574601	Hexb	NM_010422	hexosaminidase B	protein_coding	chr13	-	NM_010422	97176331	97198357
TC1400000329.mm.1	1.14087	up	0.013987	0.546476	Eaf1	NM_028932	ELL associated factor 1	protein_coding	chr14	+	NM_028932	31495079	31509858
TC1400002281.mm.1	1.17655	up	0.0390087	0.602087	Bnip3l	NM_009761	BCL2/adenovirus E1B interacting protein 3-like	protein_coding	chr14	-	NM_009761	66985239	67008877
TC1400002829.mm.1	1.12041	up	0.0438176	0.613792	Trav14-1	ENSMUST00000103652	T cell receptor alpha variable 14-1	protein_coding	chr14	+	ENSMUST00000103652	53554022	53554749
TC1500001379.mm.1	1.13201	up	0.00687443	0.538479	Pabpc1	NM_008774	poly(A) binding protein, cytoplasmic 1	protein_coding	chr15	-	NM_008774	36595658	36608973
TC1700000271.mm.1	1.19417	up	0.0196559	0.557388	Zfp51	NM_009558	zinc finger protein 51	protein_coding	chr17	+	NM_009558	21450352	21465591
TC1700000274.mm.1	1.21251	up	0.00160695	0.53309	Zfp52	NM_144515	zinc finger protein 52	protein_coding	chr17	+	NM_144515	21535539	21562602
TC1700002723.mm.1	1.22855	up	0.033337	0.593342	Kpna2	ENSMUST00000086423	karyopherin (importin) alpha 2	protein_coding	chr17	-	ENSMUST00000086423	89908511	89910449
TC1800000480.mm.1	1.36193	up	0.00268023	0.53309	Eif1a	NM_010120	eukaryotic translation initiation factor 1A	protein_coding	chr18	+	NM_010120	46597704	46610225
TC1900000221.mm.1	1.60481	up	0.0317455	0.590103	Ms4a6c	NM_001166376	membrane-spanning 4-domains, subfamily A, member 6C	protein_coding	chr19	+	NM_001166376	11469368	11482197
TC0100003564.mm.1	-1.51623	down	0.0280355	0.581031	Casq1	NM_009813	calsequestrin 1	protein_coding	chr1	-	NM_009813	172209894	172219895
TC0200004660.mm.1	-1.31957	down	0.0228745	0.569815	Adra1d	NM_013460	adrenergic receptor, alpha 1d	protein_coding	chr2	-	NM_013460	131545357	131562285
TC0300002333.mm.1	-1.11339	down	0.00562478	0.534517	Rusc1	NM_001083807	RUN and SH3 domain containing 1	protein_coding	chr3	-	NM_001083807	89083977	89093363
TC0300002709.mm.1	-1.42244	down	0.0212191	0.56251	Kcnc4	NM_145922	potassium voltage gated channel, Shaw-related subfamily, member 4	protein_coding	chr3	-	NM_145922	107438303	107458898
TC0300002725.mm.1	-1.13172	down	0.00740961	0.538479	Gstm1	NM_010358	glutathione S-transferase, mu 1	protein_coding	chr3	-	NM_010358	108012250	108017973
TC0300002728.mm.1	-1.13149	down	0.0416673	0.608268	Gstm4	NM_001160411	glutathione S-transferase, mu 4	protein_coding	chr3	-	NM_001160411	108040408	108044894
TC0400003529.mm.1	-1.1745	down	0.0231301	0.569815	Sh3d21	NM_001162533	SH3 domain containing 21	protein_coding	chr4	-	NM_001162533	126150602	126163491
TC0400004152.mm.1	-1.13861	down	0.0081564	0.539017	Vwa1	NM_147776	von Willebrand factor A domain containing 1	protein_coding	chr4	-	NM_147776	155768149	155774698
TC0500001170.mm.1	-1.15839	down	0.0126709	0.546476	Gm26897	ENSMUST00000180627	predicted gene, 26897	protein_coding	chr5	+	ENSMUST00000180627	111733924	111734574
TC0500003097.mm.1	-1.10799	down	0.0229673	0.569815	Cox6a1	NM_007748	cytochrome c oxidase subunit VIa polypeptide 1	protein_coding	chr5	-	NM_007748	115345642	115348981
TC0500003391.mm.1	-1.10484	down	0.0279886	0.581031	Fzd9	NM_010246	frizzled homolog 9 (Drosophila)	protein_coding	chr5	-	NM_010246	135248938	135251230
TC0500003605.mm.1	-1.15263	down	0.0365594	0.597892	1700001J03Rik	NM_001008547	RIKEN cDNA 1700001J03 gene	protein_coding	chr5	-	NM_001008547	146182450	146185304
TC0600000386.mm.1	-1.15488	down	0.0112923	0.546476	Clec2l	NM_001101507	C-type lectin domain family 2, member L	protein_coding	chr6	+	NM_001101507	38663069	38680865
TC0600000459.mm.1	-1.16769	down	0.0198363	0.558206	Zyx	NM_001289617	zyxin	protein_coding	chr6	+	NM_001289617	42349828	42360213
TC0600001146.mm.1	-1.14497	down	0.00432865	0.53309	Gpr27	NM_008158	G protein-coupled receptor 27	protein_coding	chr6	+	NM_008158	99692679	99693818
TC0600002166.mm.1	-1.10779	down	0.0201113	0.559389	Fam131b	NM_001113327	family with sequence similarity 131, member B	protein_coding	chr6	-	NM_001113327	42315305	42324643
TC0800000765.mm.1	-1.21606	down	0.00187219	0.53309	Rab3a	NM_001166399	RAB3A, member RAS oncogene family	protein_coding	chr8	+	NM_001166399	70754679	70758686
TC0800001513.mm.1	-1.10306	down	0.0243139	0.573638	Spata33	NM_177279	spermatogenesis associated 33	protein_coding	chr8	+	NM_177279	123212858	123222045
TC0800003193.mm.1	-1.11503	down	0.0252521	0.576132	Irf2bp2	NM_001164598	interferon regulatory factor 2 binding protein 2	protein_coding	chr8	-	NM_001164598	126588296	126593986
TC0900003037.mm.1	-1.15134	down	0.0446842	0.615022	Sema3b	NM_001042779	sema domain, immunoglobulin domain (Ig), short basic domain, secreted, (semaphorin) 3B	protein_coding	chr9	-	NM_001042779	107597674	107609241
TC0X00002320.mm.1	-1.45903	down	0.039841	0.602174	Cdr1	NM_001166658	cerebellar degeneration related antigen 1	protein_coding	chrX	-	NM_001166658	61183246	61185558
TC1000002035.mm.1	-1.16513	down	0.039145	0.602087	AI317395	NM_144821	expressed sequence AI317395	protein_coding	chr10	-	NM_144821	40001573	40025268
TC1100001928.mm.1	-1.14368	down	0.00785623	0.538647	Galr2	NM_010254	galanin receptor 2	protein_coding	chr11	+	NM_010254	116280939	116283938
TC1100003064.mm.1	-1.17064	down	0.00686112	0.538479	Fgf11	NM_010198	fibroblast growth factor 11	protein_coding	chr11	-	NM_010198	69796068	69801857
TC1500001779.mm.1	-1.12087	down	0.00618053	0.538479	Gm8140	XM_984290	predicted gene 8140	protein_coding	chr15	-	XM_984290	76533213	76535366
TC1800000394.mm.1	-1.1199	down	0.0144584	0.546922	0610009O20Rik	NM_024179	RIKEN cDNA 0610009O20 gene	protein_coding	chr18	+	NM_024179	38250249	38262629
TC1900000060.mm.1	-1.26062	down	0.0416849	0.608268	Gal3st3	NM_001024717	galactose-3-O-sulfotransferase 3	protein_coding	chr19	+	NM_001024717	5298323	5308739
TC1900001081.mm.1	-1.1261	down	0.0237086	0.571043	Asrgl1	NM_025610	asparaginase like 1	protein_coding	chr19	-	NM_025610	9109868	9135636

## Sheet: CIH12W vs Nor12W
probe_set	Fold Change	Regulation	P.Value	adj.P.Val	Gene.Symbol	Gene_ID	Gene_Discription	biotype	Chromosome	Strand	Public.Gene.IDs	Start	Stop
TC0100000399.mm.1	1.223	up	0.0172378	0.284947	Mars2	NM_175439	methionine-tRNA synthetase 2 (mitochondrial)	protein_coding	chr1	+	NM_175439	55237124	55240058
TC0200000620.mm.1	1.414	up	0.000737681	0.107147	Hspa5	NM_001163434	heat shock protein 5	protein_coding	chr2	+	NM_001163434	34771970	34776531
TC0200003512.mm.1	1.414	up	0.0210483	0.305517	Rnd3	NM_028810	Rho family GTPase 3	protein_coding	chr2	-	NM_028810	51130438	51149111
TC0200005002.mm.1	1.223	up	0.0413195	0.382065	4930518I15Rik	XR_104749	RIKEN cDNA 4930518I15 gene	protein_coding	chr2	-	XR_104749	156856615	156858069
TC0300003087.mm.1	1.659	up	0.0462539	0.395171	Cyr61	NM_010516	cysteine rich protein 61	protein_coding	chr3	-	NM_010516	145646971	145649985
TC0300003140.mm.1	1.275	up	0.00275163	0.155249	Nexn	NM_199465	nexilin	protein_coding	chr3	-	NM_199465	152236982	152266320
TC0400000271.mm.1	1.206	up	0.00102329	0.117335	Mdn1	NM_001081392	midasin homolog (yeast)	protein_coding	chr4	+	NM_001081392	32657119	32775217
TC0400001312.mm.1	1.125	up	0.000911083	0.114179	Ebna1bp2	NM_026932	EBNA1 binding protein 2	protein_coding	chr4	+	NM_026932	118620799	118631915
TC0500000013.mm.1	1.141	up	0.0321809	0.353024	1700109H08Rik	NM_029843	RIKEN cDNA 1700109H08 gene	protein_coding	chr5	+	NM_029843	3571566	3584356
TC0500000302.mm.1	1.133	up	0.00794776	0.216734	Tmem214	NM_144525	transmembrane protein 214	protein_coding	chr5	+	NM_144525	30869579	30879191
TC0500000334.mm.1	1.292	up	0.00252838	0.151369	Fosl2	NM_008037	fos-like antigen 2	protein_coding	chr5	+	NM_008037	32136472	32157840
TC0500001590.mm.1	1.905	up	1.99228e-05	0.0354082	Hspb1	NM_013560	heat shock protein 1	protein_coding	chr5	+	NM_013560	135887919	135889563
TC0600000621.mm.1	1.376	up	0.00317339	0.162794	5730596B20Rik	XR_105021	RIKEN cDNA 5730596B20 gene	protein_coding	chr6	+	XR_105021	52177498	52180851
TC0600001622.mm.1	1.181	up	0.00616061	0.204288	Atf7ip	NM_019426	activating transcription factor 7 interacting protein	protein_coding	chr6	+	NM_019426	136518851	136607379
TC0600001625.mm.1	1.283	up	0.00641065	0.207163	Atf7ip	ENSMUST00000066689	activating transcription factor 7 interacting protein	protein_coding	chr6	+	ENSMUST00000066689	136607823	136610870
TC0600002275.mm.1	1.223	up	0.00823426	0.219752	Hoxa1	NM_010449	homeobox A1	protein_coding	chr6	-	NM_010449	52155367	52158317
TC0600003540.mm.1	1.283	up	0.0101473	0.233681	Hoxa2	NM_010451	homeobox A2	protein_coding	chr6	-	NM_010451	52162351	52165413
TC0700000024.mm.1	1.181	up	0.0035509	0.16693	Leng8	NM_172736	leukocyte receptor cluster (LRC) member 8	protein_coding	chr7	+	NM_172736	4137039	4148173
TC0700002696.mm.1	1.357	up	0.0135484	0.2624	Zfp36	NM_011756	zinc finger protein 36	protein_coding	chr7	-	NM_011756	28376784	28379255
TC0700004281.mm.1	1.11	up	0.00719811	0.213651	Atxn2l	NM_183020	ataxin 2-like	protein_coding	chr7	-	NM_183020	126491708	126503437
TC0700004397.mm.1	1.165	up	0.00602278	0.203241	2310057M21Rik	NM_026655	RIKEN cDNA 2310057M21 gene	protein_coding	chr7	-	NM_026655	131342718	131362706
TC0700004409.mm.1	1.125	up	0.0484852	0.399263	Oat	NM_016978	ornithine aminotransferase	protein_coding	chr7	-	NM_016978	132557475	132576398
TC0700004628.mm.1	1.102	up	0.0405222	0.37975	Prr14	NM_145589	proline rich 14	protein_coding	chr7	+	NM_145589	127470371	127476759
TC0900000191.mm.1	1.102	up	0.0391672	0.376521	Atg4d	NM_153583	autophagy related 4D, cysteine peptidase	protein_coding	chr9	+	NM_153583	21265285	21274837
TC0900000500.mm.1	1.31	up	0.00375111	0.169917	Mcam	NM_023061	melanoma cell adhesion molecule	protein_coding	chr9	+	NM_023061	44134469	44142727
TC0900001592.mm.1	1.165	up	0.0277062	0.335239	Ccr8	NM_007720	chemokine (C-C motif) receptor 8	protein_coding	chr9	+	NM_007720	120092133	120094906
TC0900002862.mm.1	1.189	up	0.0111627	0.242825	Chst2	NM_018763	carbohydrate sulfotransferase 2	protein_coding	chr9	-	NM_018763	95400926	95407270
TC0900003275.mm.1	1.214	up	0.0229694	0.314179	Higd1a	NM_019814	HIG1 domain family, member 1A	protein_coding	chr9	-	NM_019814	121848560	121858000
TC0X00000801.mm.1	1.206	up	0.00618232	0.204295	Tmem47	NM_138751	transmembrane protein 47	protein_coding	chrX	+	NM_138751	81070644	81099122
TC1000000215.mm.1	1.505	up	0.000786191	0.107912	Ctgf	NM_010217	connective tissue growth factor	protein_coding	chr10	+	NM_010217	24595442	24598683
TC1000000365.mm.1	1.206	up	0.00322646	0.163371	Mical1	NM_001164433	microtubule associated monooxygenase, calponin and LIM domain containing 1	protein_coding	chr10	+	NM_001164433	41476314	41487032
TC1000000891.mm.1	1.102	up	0.00879846	0.221686	Apba3	NM_018758	amyloid beta (A4) precursor protein-binding, family A, member 3	protein_coding	chr10	+	NM_018758	81268172	81273247
TC1000001284.mm.1	1.275	up	0.00224239	0.145513	Csrp2	NM_007792	cysteine and glycine-rich protein 2	protein_coding	chr10	+	NM_007792	110920176	110939599
TC1000001581.mm.1	1.125	up	0.0341146	0.360126	Ptges3	NM_019766	prostaglandin E synthase 3 (cytosolic)	protein_coding	chr10	+	NM_019766	128058954	128077272
TC1000002229.mm.1	1.292	up	0.0401403	0.378183	Chst3	NM_016803	carbohydrate (chondroitin 6/keratan) sulfotransferase 3	protein_coding	chr10	-	NM_016803	60181527	60219260
TC1100000072.mm.1	1.214	up	0.00274473	0.154993	Xbp1	NM_001271730	X-box binding protein 1	protein_coding	chr11	+	NM_001271730	5520641	5525993
TC1100000094.mm.1	1.102	up	0.0128859	0.257964	Zmiz2	NM_001005867	zinc finger, MIZ-type containing 2	protein_coding	chr11	+	NM_001005867	6389074	6406162
TC1100001495.mm.1	1.181	up	0.0352699	0.363195	Hoxb6	NM_008269	homeobox B6	protein_coding	chr11	+	NM_008269	96292476	96301569
TC1100002592.mm.1	1.157	up	0.000983258	0.11643	Lsm11	NM_028185	U7 snRNP-specific Sm-like protein LSM11	protein_coding	chr11	-	NM_028185	45928269	45944935
TC1100002593.mm.1	1.102	up	0.0175912	0.287404	Thg1l	NM_001080969	tRNA-histidine guanylyltransferase 1-like (S. cerevisiae)	protein_coding	chr11	-	NM_001080969	45946843	45955494
TC1100002597.mm.1	1.165	up	0.0331637	0.356659	Nipal4	NM_172524	NIPA-like domain containing 4	protein_coding	chr11	-	NM_172524	46148155	46166508
TC1100002667.mm.1	1.173	up	0.0124898	0.254547	Maml1	NM_175334	mastermind like 1 (Drosophila)	protein_coding	chr11	-	NM_175334	50255634	50292336
TC1100003437.mm.1	1.173	up	0.00254932	0.15193	Ints2	NM_027421	integrator complex subunit 2	protein_coding	chr11	-	NM_027421	86210681	86257575
TC1100003630.mm.1	1.102	up	0.0118826	0.249427	Sp2	NM_001080964	Sp2 transcription factor	protein_coding	chr11	-	NM_001080964	96953337	96982959
TC1100003816.mm.1	1.395	up	0.0488137	0.399796	Sost	NM_024449	sclerostin	protein_coding	chr11	-	NM_024449	101962458	101967015
TC1100004283.mm.1	1.141	up	0.0384606	0.373265	Syngr2	NM_009304	synaptogyrin 2	protein_coding	chr11	+	NM_009304	117809667	117814286
TC1200001988.mm.1	1.283	up	0.00261481	0.152276	Zfp36l1	NM_007564	zinc finger protein 36, C3H type-like 1	protein_coding	chr12	-	NM_007564	80107760	80113013
TC1300000120.mm.1	1.125	up	0.0357375	0.365216	Mplkip	NM_025479	M-phase specific PLK1 intereacting protein	protein_coding	chr13	+	NM_025479	17695413	17699112
TC1400002382.mm.1	1.329	up	0.0243957	0.320622	Rb1	ENSMUST00000163932	retinoblastoma 1	protein_coding	chr14	-	ENSMUST00000163932	73183673	73287707
TC1600001301.mm.1	1.11	up	0.00770186	0.215248	Dgcr14	NM_001081633	DiGeorge syndrome critical region gene 14	protein_coding	chr16	-	NM_001081633	17900709	17911348
TC1600001400.mm.1	1.366	up	0.0158201	0.277066	Bcl6	NM_009744	B cell leukemia/lymphoma 6	protein_coding	chr16	-	NM_009744	23965052	23988852
TC1700000711.mm.1	1.189	up	0.01828	0.291437	Ppp1r10	NM_001163818	protein phosphatase 1, regulatory subunit 10	protein_coding	chr17	+	NM_001163818	35916434	35932283
TC1700001032.mm.1	1.157	up	0.00833587	0.220626	Trip10	NM_001242389	thyroid hormone receptor interactor 10	protein_coding	chr17	+	NM_001242389	57249451	57263697
TC1800001303.mm.1	1.173	up	0.00570524	0.19952	Fem1c	NM_173423	fem-1 homolog c (C.elegans)	protein_coding	chr18	-	NM_173423	46500493	46525971
TC1900000124.mm.1	1.102	up	0.0205444	0.303341	Trmt112	NM_001166370	tRNA methyltransferase 11-2	protein_coding	chr19	+	NM_001166370	6909698	6911049
TC1900000165.mm.1	1.133	up	0.0142181	0.266616	Ganab	NM_008060	alpha glucosidase 2 alpha neutral subunit	protein_coding	chr19	+	NM_008060	8898090	8916666
TC1900000913.mm.1	1.125	up	0.021032	0.305517	Ssh3	NM_198113	slingshot homolog 3 (Drosophila)	protein_coding	chr19	-	NM_198113	4261668	4269172
TC1900001025.mm.1	1.181	up	0.0118279	0.249227	Plcb3	NM_008874	phospholipase C, beta 3	protein_coding	chr19	-	NM_008874	6952325	6969759
TC1900001677.mm.1	1.102	up	0.0186631	0.292932	Nutf2-ps1	NR_033574	nuclear transport factor 2, pseudogene 1	protein_coding	chr19	-	NR_033574	53588151	53589067
TC0200001553.mm.1	-1.165	down	0.00282279	0.15593	A930018P22Rik	NM_026634	RIKEN cDNA A930018P22 gene	protein_coding	chr2	+	NM_026634	104122769	104124749
TC0200002266.mm.1	-1.117	down	0.0319971	0.352389	Tmem74b	NM_001160363	transmembrane protein 74B	protein_coding	chr2	+	NM_001160363	151702008	151712157
TC0200002706.mm.1	-2.114	down	0.0178103	0.288481	Tubb1	NM_001080971	tubulin, beta 1 class VI	protein_coding	chr2	+	NM_001080971	174450595	174458380
TC0200003148.mm.1	-1.102	down	0.0184387	0.292015	BC029214	NM_153557	cDNA sequence BC029214	protein_coding	chr2	-	NM_153557	25455141	25461094
TC0200003271.mm.1	-1.366	down	0.0038119	0.171382	Crat	NM_007760	carnitine acetyltransferase	protein_coding	chr2	-	NM_007760	30400471	30415813
TC0200004102.mm.1	-1.189	down	0.00785486	0.216734	Ndufs3	NM_026688	NADH dehydrogenase (ubiquinone) Fe-S protein 3	protein_coding	chr2	-	NM_026688	90894634	90904827
TC0200005104.mm.1	-1.125	down	0.0399682	0.378136	Kcns1	NM_008435	K+ voltage-gated channel, subfamily S, 1	protein_coding	chr2	-	NM_008435	164163619	164171113
TC0200005316.mm.1	-1.141	down	0.0204908	0.303094	Atp5e	NM_025983	ATP synthase, H+ transporting, mitochondrial F1 complex, epsilon subunit	protein_coding	chr2	-	NM_025983	174461072	174464105
TC0200005317.mm.1	-1.157	down	0.0312949	0.34965	Slmo2	NM_025531	slowmo homolog 2 (Drosophila)	protein_coding	chr2	-	NM_025531	174465067	174473081
TC0300000806.mm.1	-1.11	down	0.0413255	0.382067	S100a3	NM_011310	S100 calcium binding protein A3	protein_coding	chr3	+	NM_011310	90600215	90602702
TC0300000949.mm.1	-1.206	down	0.0250937	0.323725	Txnip	NM_001009935	thioredoxin interacting protein	protein_coding	chr3	+	NM_001009935	96557957	96561883
TC0300002112.mm.1	-1.165	down	0.0348246	0.362154	Gm17402	ENSMUST00000166353	predicted gene, 17402	protein_coding	chr3	-	ENSMUST00000166353	67365461	67375163
TC0300002712.mm.1	-1.173	down	0.0480093	0.398919	Ubl4b	NM_026261	ubiquitin-like 4B	protein_coding	chr3	-	NM_026261	107553698	107555073
TC0400002367.mm.1	-1.157	down	0.0288675	0.340248	Ankrd6	NM_001012450	ankyrin repeat domain 6	protein_coding	chr4	-	NM_001012450	32804035	32950841
TC0400002535.mm.1	-1.125	down	0.0302542	0.346024	Spag8	NM_001007463	sperm associated antigen 8	protein_coding	chr4	-	NM_001007463	43651330	43653594
TC0400002768.mm.1	-4.028	down	0.00312468	0.16161	Mup1	NM_001163010	major urinary protein 1	protein_coding	chr4	-	NM_001163010	60498012	60501960
TC0400002769.mm.1	-4.112	down	0.00409091	0.176056	Mup19	NM_001134644_2	major urinary protein 19	protein_coding	chr4	-	NM_001134644_2	61224307	61674136
TC0400002770.mm.1	-4.141	down	0.00440059	0.180937	Mup19	NM_001134644_4	major urinary protein 19	protein_coding	chr4	-	NM_001134644_4	61778324	61782269
TC0400003271.mm.1	-1.149	down	0.0404968	0.37975	Cdkn2c	NM_007671	cyclin-dependent kinase inhibitor 2C (p18, inhibits CDK4)	protein_coding	chr4	-	NM_007671	109660876	109667189
TC0400003392.mm.1	-1.376	down	0.0214518	0.307884	Mpl	NM_001122949	myeloproliferative leukemia virus oncogene	protein_coding	chr4	-	NM_001122949	118442415	118457513
TC0400003584.mm.1	-1.11	down	0.0332953	0.357078	Hpca	NM_001130419	hippocalcin	protein_coding	chr4	-	NM_001130419	129111570	129122036
TC0400004208.mm.1	-3.784	down	0.00330968	0.163726	Mup7	NM_001134675	major urinary protein 7	protein_coding	chr4	-	NM_001134675	60066469	60070475
TC0400004209.mm.1	-3.732	down	0.00371453	0.169484	Mup2	NM_001045550	major urinary protein 2	protein_coding	chr4	-	NM_001045550	60135913	60154289
TC0400004211.mm.1	-3.891	down	0.00368042	0.168808	Mup2	NM_001045550	major urinary protein 2	protein_coding	chr4	-	NM_001045550	60578241	60662411
TC0400004212.mm.1	-4.257	down	0.00449626	0.182901	Mup12	NM_001199995	major urinary protein 12	protein_coding	chr4	-	NM_001199995	60737381	60741326
TC0500001257.mm.1	-1.165	down	0.00874433	0.221686	Triap1	NM_026933	TP53 regulated inhibitor of apoptosis 1	protein_coding	chr5	+	NM_026933	115341225	115343569
TC0500001976.mm.1	-1.157	down	0.00764108	0.214874	Gm21149	XM_003688812	predicted gene, 21149	protein_coding	chr5	-	XM_003688812	15471698	15605059
TC0500001979.mm.1	-1.141	down	0.0342102	0.360515	4930572O03Rik	NR_073011	spermatogenesis associated glutamate (E)-rich protein pseudogene	protein_coding	chr5	-	NR_073011	15652286	15657059
TC0500002365.mm.1	-1.223	down	0.00194489	0.140962	Gm10048	ENSMUST00000080695	predicted gene 10048	protein_coding	chr5	-	ENSMUST00000080695	48927861	48928234
TC0500002785.mm.1	-1.157	down	0.0408976	0.380941	Gm10424	XM_001476548	predicted gene 10424	protein_coding	chr5	-	XM_001476548	95268794	95271588
TC0500003097.mm.1	-1.11	down	0.0288202	0.340248	Cox6a1	NM_007748	cytochrome c oxidase subunit VIa polypeptide 1	protein_coding	chr5	-	NM_007748	115345642	115348981
TC0600000854.mm.1	-1.591	down	0.000731097	0.107147	Retsat	NM_026159	retinol saturase (all trans retinol 13,14 reductase)	protein_coding	chr6	+	NM_026159	72598475	72608425
TC0600001146.mm.1	-1.11	down	0.0279011	0.336425	Gpr27	NM_008158	G protein-coupled receptor 27	protein_coding	chr6	+	NM_008158	99692679	99693818
TC0600002990.mm.1	-1.248	down	0.0123285	0.253653	4933440N22Rik	ENSMUST00000035534	RIKEN cDNA 4933440N22 gene	protein_coding	chr6	-	ENSMUST00000035534	117907110	117907760
TC0600003573.mm.1	-2.042	down	0.000830749	0.110026	Igkv4-53	ENSMUST00000166380	immunoglobulin kappa variable 4-53	protein_coding	chr6	-	ENSMUST00000166380	69648824	69649354
TC0700000811.mm.1	-1.157	down	0.00446509	0.182127	Kcnc3	NM_008422	potassium voltage gated channel, Shaw-related subfamily, member 3	protein_coding	chr7	+	NM_008422	44590664	44604754
TC0700001804.mm.1	-1.149	down	0.0246274	0.321267	Tufm	NM_001163713	Tu translation elongation factor, mitochondrial	protein_coding	chr7	+	NM_001163713	126487355	126490731
TC0700002053.mm.1	-1.329	down	0.0220484	0.311032	Pnpla2	NM_001163689	patatin-like phospholipase domain containing 2	protein_coding	chr7	+	NM_001163689	141455188	141460743
TC0700002632.mm.1	-1.548	down	0.0039165	0.17352	Lipe	NM_001039507	lipase, hormone sensitive	protein_coding	chr7	-	NM_001039507	25379527	25398710
TC0700002633.mm.1	-1.223	down	0.00409736	0.176056	Cxcl17	NM_153576	chemokine (C-X-C motif) ligand 17	protein_coding	chr7	-	NM_153576	25400053	25412886
TC0700004224.mm.1	-1.125	down	0.024342	0.320622	Ndufab1	NM_028177	NADH dehydrogenase (ubiquinone) 1, alpha/beta subcomplex, 1	protein_coding	chr7	-	NM_028177	122085403	122101886
TC0800000015.mm.1	-1.173	down	0.000798638	0.108608	Pet100	NM_001195244	PET100 homolog (S. cerevisiae)	protein_coding	chr8	+	NM_001195244	3621551	3624235
TC0800000707.mm.1	-1.338	down	0.0301789	0.345528	Lpl	NM_008509	lipoprotein lipase	protein_coding	chr8	+	NM_008509	68880491	68907448
TC0800001419.mm.1	-1.11	down	0.0341786	0.360397	Mlycd	NM_019966	malonyl-CoA decarboxylase	protein_coding	chr8	+	NM_019966	119394878	119411102
TC0800001955.mm.1	-1.444	down	0.0322367	0.353113	Adrb3	NM_013462	adrenergic receptor, beta 3	protein_coding	chr8	-	NM_013462	27225776	27229588
TC0900000541.mm.1	-1.424	down	0.0382044	0.372071	Fxyd2	NM_007503	FXYD domain-containing ion transport regulator 2	protein_coding	chr9	+	NM_007503	45399709	45410278
TC0900000705.mm.1	-1.366	down	0.00377469	0.17029	Cox5a	NM_007747	cytochrome c oxidase subunit Va	protein_coding	chr9	+	NM_007747	57521232	57532427
TC0900001195.mm.1	-1.659	down	0.0315646	0.350655	Paqr9	NM_198414	progestin and adipoQ receptor family member IX	protein_coding	chr9	+	NM_198414	95559817	95562121
TC0900001365.mm.1	-1.197	down	0.00606189	0.20347	Cish	NM_009895	cytokine inducible SH2-containing protein	protein_coding	chr9	+	NM_009895	107296026	107302784
TC0900003052.mm.1	-1.102	down	0.0347373	0.361964	Bsn	NM_007567	bassoon	protein_coding	chr9	-	NM_007567	108096022	108190384
TC0M00000006.mm.1	-1.102	down	0.0380491	0.371948	COX1	ENSMUST00000082402	cytochrome c oxidase subunit I	protein_coding	chrM	+	ENSMUST00000082402	5327	6938
TC0M00000011.mm.1	-1.11	down	0.0280573	0.336767	ND3	ENSMUST00000082411	NADH dehydrogenase subunit 3	protein_coding	chrM	+	ENSMUST00000082411	9459	9806
TC0M00000027.mm.1	-1.214	down	0.000756105	0.107523	ND6	ENSMUST00000082419	NADH dehydrogenase subunit 6	protein_coding	chrM	-	ENSMUST00000082419	11720	14070
TC0X00002434.mm.1	-1.223	down	0.00997125	0.231817	Idh3g	NM_008323	isocitrate dehydrogenase 3 (NAD+), gamma	protein_coding	chrX	-	NM_008323	73778963	73786897
TC1000000837.mm.1	-1.24	down	8.51503e-06	0.0277504	Gpx4	NM_001037741	glutathione peroxidase 4	protein_coding	chr10	+	NM_001037741	80047166	80056439
TC1000002049.mm.1	-1.173	down	0.00830779	0.220626	Gpr6	NM_199058	G protein-coupled receptor 6	protein_coding	chr10	-	NM_199058	41069981	41072285
TC1000002385.mm.1	-1.165	down	0.0414246	0.382454	Gstt2	NM_010361	glutathione S-transferase, theta 2	protein_coding	chr10	-	NM_010361	75831845	75834881
TC1100001147.mm.1	-1.102	down	0.0395396	0.377076	Tlcd1	NM_026708	TLC domain containing 1	protein_coding	chr11	+	NM_026708	78176711	78181909
TC1100002029.mm.1	-1.181	down	0.000448965	0.09854	Mrpl12	NM_027204	mitochondrial ribosomal protein L12	protein_coding	chr11	+	NM_027204	120484613	120489065
TC1100002030.mm.1	-1.133	down	0.0242835	0.320521	Slc25a10	NM_013770	solute carrier family 25 (mitochondrial carrier, dicarboxylate transporter), member 10	protein_coding	chr11	+	NM_013770	120491837	120501161
TC1100003046.mm.1	-1.11	down	0.0241897	0.320244	Efnb3	NM_007911	ephrin B3	protein_coding	chr11	-	NM_007911	69554092	69560237
TC1100003268.mm.1	-1.157	down	0.00829936	0.220626	Gm10392	ENSMUST00000100807	predicted gene 10392	protein_coding	chr11	-	ENSMUST00000100807	77516660	77519198
TC1100003285.mm.1	-1.102	down	0.012243	0.252921	Traf4	NM_009423	TNF receptor associated factor 4	protein_coding	chr11	-	NM_009423	78158423	78165589
TC1100003571.mm.1	-1.141	down	0.0121411	0.252205	Gm11541	NM_001007584	predicted gene 11541	protein_coding	chr11	-	NM_001007584	94694498	94704499
TC1100003629.mm.1	-1.117	down	0.0146011	0.268809	Pnpo	NM_134021	pyridoxine 5-phosphate oxidase	protein_coding	chr11	-	NM_134021	96937816	96944019
TC1100003634.mm.1	-1.117	down	0.0195961	0.29881	Lrrc46	NM_027026	leucine rich repeat containing 46	protein_coding	chr11	-	NM_027026	97034602	97041407
TC1100004264.mm.1	-1.11	down	0.039792	0.377807	Mgat4b	NM_145926	mannoside acetylglucosaminyltransferase 4, isoenzyme B	protein_coding	chr11	+	NM_145926	50225335	50235103
TC1100004300.mm.1	-1.223	down	0.0415109	0.382655	Slc25a19	NM_001252384	solute carrier family 25 (mitochondrial thiamine pyrophosphate carrier), member 19	protein_coding	chr11	-	NM_001252384	115614178	115628295
TC1200001593.mm.1	-1.301	down	0.0142791	0.266616	Dld	NM_007861	dihydrolipoamide dehydrogenase	protein_coding	chr12	-	NM_007861	31331562	31351471
TC1200002415.mm.1	-1.102	down	0.0184373	0.292015	Xrcc3	NM_028875	X-ray repair complementing defective repair in Chinese hamster cells 3	protein_coding	chr12	-	NM_028875	111803192	111813873
TC1300001081.mm.1	-1.357	down	0.0145879	0.268759	F2rl2	NM_010170	coagulation factor II (thrombin) receptor-like 2	protein_coding	chr13	+	NM_010170	95696853	95702768
TC1300001353.mm.1	-1.395	down	0.031311	0.34965	Hmgcs1	NM_145942	3-hydroxy-3-methylglutaryl-Coenzyme A synthase 1	protein_coding	chr13	+	NM_145942	119690446	119708086
TC1400000004.mm.1	-1.133	down	0.00759395	0.214874	D830030K20Rik	NM_177135	RIKEN cDNA D830030K20 gene	protein_coding	chr14	+	NM_177135	3208493	3234351
TC1400000014.mm.1	-1.149	down	0.012974	0.258763	D830030K20Rik	NM_177135	RIKEN cDNA D830030K20 gene	protein_coding	chr14	+	NM_177135	3846245	3856085
TC1400000034.mm.1	-1.149	down	0.0122116	0.252749	Gm3278	XM_001476676	predicted gene 3278	protein_coding	chr14	+	XM_001476676	4892416	4902431
TC1400000041.mm.1	-1.231	down	0.00320125	0.162918	Gm8271	XM_985778	predicted gene 8271	protein_coding	chr14	+	XM_985778	5185793	5193743
TC1400000047.mm.1	-1.189	down	0.00206473	0.142477	Gm3532	ENSMUST00000181880	predicted gene 3532	protein_coding	chr14	+	ENSMUST00000181880	5538423	5546373
TC1400000469.mm.1	-1.141	down	0.0285631	0.339177	Gm8247	ENSMUST00000170094	predicted gene 8247	protein_coding	chr14	+	ENSMUST00000170094	44583153	44588402
TC1400001410.mm.1	-1.141	down	0.0123439	0.253701	Gm16440	XR_141199	predicted gene 16440	protein_coding	chr14	-	XR_141199	6380721	6390319
TC1400001427.mm.1	-1.125	down	0.0397765	0.377807	Gm3755	ENSMUST00000169555	predicted gene 3755	protein_coding	chr14	-	ENSMUST00000169555	7440924	7450917
TC1400001696.mm.1	-1.125	down	0.030645	0.346991	Timm23	NM_016897	translocase of inner mitochondrial membrane 23	protein_coding	chr14	-	NM_016897	32180162	32201898
TC1400001819.mm.1	-1.181	down	0.0263966	0.329668	Gm17027	ENSMUST00000171202	predicted gene 17027	protein_coding	chr14	-	ENSMUST00000171202	42157290	42162622
TC1400002049.mm.1	-1.149	down	0.00602825	0.203241	Trdv5	ENSMUST00000103685	T cell receptor delta variable 5	protein_coding	chr14	-	ENSMUST00000103685	54148662	54149294
TC1500001023.mm.1	-2.329	down	0.00332292	0.163726	Gpd1	NM_010271	glycerol-3-phosphate dehydrogenase 1 (soluble)	protein_coding	chr15	+	NM_010271	99717515	99725008
TC1500001943.mm.1	-1.133	down	0.0313407	0.34965	Ndufa6	NM_025987	NADH dehydrogenase (ubiquinone) 1 alpha subcomplex, 6 (B14)	protein_coding	chr15	-	NM_025987	82350139	82354291
TC1500001944.mm.1	-1.474	down	0.00047803	0.100379	Cyp2d22	NM_001163472	cytochrome P450, family 2, subfamily d, polypeptide 22	protein_coding	chr15	-	NM_001163472	82370527	82380260
TC1500002219.mm.1	-1.157	down	0.00305903	0.160766	Gm17349	ENSMUST00000163472	predicted gene, 17349	protein_coding	chr15	-	ENSMUST00000163472	99702176	99705490
TC1500002229.mm.1	-1.11	down	0.0125246	0.254725	1700030F18Rik	NM_028180	RIKEN cDNA 1700030F18 gene	protein_coding	chr15	-	NM_028180	99918348	99967075
TC1600000981.mm.1	-1.165	down	0.000361157	0.0934181	Sod1	NM_011434	superoxide dismutase 1, soluble	protein_coding	chr16	+	NM_011434	90220742	90226329
TC1600001042.mm.1	-1.214	down	0.00105591	0.118503	Cbr1	NM_007620	carbonyl reductase 1	protein_coding	chr16	+	NM_007620	93607837	93610505
TC1600001199.mm.1	-1.173	down	0.0143872	0.26783	Tnp2	NM_013694	transition protein 2	protein_coding	chr16	-	NM_013694	10787935	10788655
TC1600001303.mm.1	-1.292	down	0.0137129	0.263456	Slc25a1	NM_153150	solute carrier family 25 (mitochondrial carrier, citrate transporter), member 1	protein_coding	chr16	-	NM_153150	17925211	17928219
TC1700000340.mm.1	-1.11	down	0.0448138	0.391852	Bricd5	NM_175682	BRICHOS domain containing 5	protein_coding	chr17	+	NM_175682	24473884	24475469
TC1700001459.mm.1	-1.301	down	0.0194223	0.297703	Acat2	NM_009338	acetyl-Coenzyme A acetyltransferase 2	protein_coding	chr17	-	NM_009338	12942890	12960747
TC1700001942.mm.1	-1.338	down	0.0155626	0.274937	G6b	NM_001033221	immunoreceptor tyrosine-based inhibitory motif (ITIM) containing platelet receptor	protein_coding	chr17	-	NM_001033221	35062693	35066184
TC1700002422.mm.1	-1.157	down	0.00954377	0.227409	Ndufv2	NM_001278415	NADH dehydrogenase (ubiquinone) flavoprotein 2	protein_coding	chr17	-	NM_001278415	66078795	66101559
TC1700002786.mm.1	-1.231	down	0.00528129	0.194363	Ly6g6c	NM_023463	lymphocyte antigen 6 complex, locus G6C	protein_coding	chr17	+	NM_023463	35067325	35070050
TC1700002812.mm.1	-1.149	down	0.00911795	0.223179	Egfl8	NM_152922	EGF-like domain 8	protein_coding	chr17	-	NM_152922	34613349	34615971
TC1900000024.mm.1	-1.117	down	0.0142265	0.266616	Doc2g	NM_021791	double C2, gamma	protein_coding	chr19	+	NM_021791	4000580	4007005
TC1900000776.mm.1	-1.197	down	0.0215803	0.308133	Acsl5	NM_027976	acyl-CoA synthetase long-chain family member 5	protein_coding	chr19	+	NM_027976	55253369	55296628
TC1900000894.mm.1	-1.266	down	0.00133211	0.129397	Ndufv1	NM_133666	NADH dehydrogenase (ubiquinone) flavoprotein 1	protein_coding	chr19	-	NM_133666	4007497	4012806
TC1900001020.mm.1	-1.117	down	0.0223485	0.311764	Esrra	NM_007953	estrogen related receptor, alpha	protein_coding	chr19	-	NM_007953	6910977	6921813

## Sheet: CIH12W vs CIH8W+Nor4W
probe_set	Fold Change	Regulation	P.Value	adj.P.Val	Gene.Symbol	Gene_ID	Gene_Discription	biotype	Chromosome	Strand	Public.Gene.IDs	Start	Stop
TC0100003300.mm.1	1.404	up	0.00327993	0.437917	Ier5	NM_010500	immediate early response 5	protein_coding	chr1	-	NM_010500	155096367	155099636
TC0100003483.mm.1	1.141	up	0.0452201	0.662418	Mgst3	NM_025569	microsomal glutathione S-transferase 3	protein_coding	chr1	-	NM_025569	167371966	167393841
TC0200000055.mm.1	1.157	up	0.0243211	0.613053	Nudt5	NM_016918	nudix (nucleoside diphosphate linked moiety X)-type motif 5	protein_coding	chr2	+	NM_016918	5845019	5871895
TC0200000620.mm.1	1.424	up	0.00102274	0.358601	Hspa5	NM_001163434	heat shock protein 5	protein_coding	chr2	+	NM_001163434	34771970	34776531
TC0200004922.mm.1	1.165	up	0.00115878	0.359669	Pdrg1	NM_178939	p53 and DNA damage regulated 1	protein_coding	chr2	-	NM_178939	153008890	153015427
TC0300000288.mm.1	1.117	up	0.0168645	0.576328	Spry1	NM_011896	sprouty homolog 1 (Drosophila)	protein_coding	chr3	+	NM_011896	37639947	37644599
TC0400001238.mm.1	1.133	up	0.0139131	0.559712	Mob3c	NM_175308	MOB kinase activator 3C	protein_coding	chr4	+	NM_175308	115828092	115836185
TC0400001312.mm.1	1.117	up	0.00226111	0.417985	Ebna1bp2	NM_026932	EBNA1 binding protein 2	protein_coding	chr4	+	NM_026932	118620799	118631915
TC0500001590.mm.1	1.647	up	0.000798324	0.355323	Hspb1	NM_013560	heat shock protein 1	protein_coding	chr5	+	NM_013560	135887919	135889563
TC0500003090.mm.1	1.181	up	0.0184182	0.587997	Mlec	NM_175403	malectin	protein_coding	chr5	-	NM_175403	115142981	115158179
TC0700001368.mm.1	1.181	up	0.032928	0.635778	Lrrc32	NM_001113379	leucine rich repeat containing 32	protein_coding	chr7	+	NM_001113379	98494222	98501831
TC0800000403.mm.1	1.149	up	0.00420156	0.451332	Tmem66	NM_026432	transmembrane protein 66	protein_coding	chr8	+	NM_026432	34154563	34170847
TC0800000962.mm.1	1.11	up	0.0394384	0.648839	Gadd45gip1	NM_183358	growth arrest and DNA-damage-inducible, gamma interacting protein 1	protein_coding	chr8	+	NM_183358	84831522	84835482
TC0800001341.mm.1	1.117	up	0.0475447	0.66763	Gabarapl2	NM_026693	gamma-aminobutyric acid (GABA) A receptor-associated protein-like 2	protein_coding	chr8	+	NM_026693	111940703	111953612
TC0800001727.mm.1	1.11	up	0.0323441	0.635778	Pcid2	NM_178708	PCI domain containing 2	protein_coding	chr8	-	NM_178708	13077189	13105459
TC0800002592.mm.1	1.11	up	0.0191743	0.592961	Rad23a	NM_009010	RAD23a homolog (S. cerevisiae)	protein_coding	chr8	-	NM_009010	84834019	84840665
TC0800002593.mm.1	1.125	up	0.00683991	0.508757	Calr	NM_007591	calreticulin	protein_coding	chr8	-	NM_007591	84841850	84846934
TC1000000215.mm.1	1.526	up	0.00093527	0.358601	Ctgf	NM_010217	connective tissue growth factor	protein_coding	chr10	+	NM_010217	24595442	24598683
TC1100000078.mm.1	1.117	up	0.0415149	0.654924	Dbnl	NM_001146308	drebrin-like	protein_coding	chr11	+	NM_001146308	5788483	5800980
TC1200001988.mm.1	1.181	up	0.0427128	0.657601	Zfp36l1	NM_007564	zinc finger protein 36, C3H type-like 1	protein_coding	chr12	-	NM_007564	80107760	80113013
TC1200002389.mm.1	1.206	up	0.0377215	0.643729	Hsp90aa1	NM_010480	heat shock protein 90, alpha (cytosolic), class A member 1	protein_coding	chr12	-	NM_010480	110690605	110702728
TC1300000173.mm.1	1.165	up	0.0114844	0.542348	Hist1h2ai	NM_178182	histone cluster 1, H2ai	protein_coding	chr13	+	NM_178182	21716412	21717454
TC1300001558.mm.1	1.444	up	0.0125046	0.544366	Hist1h2ak	NM_178183	histone cluster 1, H2ak	protein_coding	chr13	-	NM_178183	21753395	21753912
TC1300001562.mm.1	1.157	up	0.0261321	0.624482	Hist1h2an	NM_178184	histone cluster 1, H2an	protein_coding	chr13	-	NM_178184	21786826	21787218
TC1300001574.mm.1	1.117	up	0.0266363	0.626899	Hist1h2ah	NM_175659	histone cluster 1, H2ah	protein_coding	chr13	-	NM_175659	22035113	22035643
TC1300001576.mm.1	1.133	up	0.0336531	0.637169	Hist1h2ag	NM_178186	histone cluster 1, H2ag	protein_coding	chr13	-	NM_178186	22042460	22042949
TC1300002697.mm.1	1.292	up	0.000528818	0.333602	Snx18	NM_130796	sorting nexin 18	protein_coding	chr13	-	NM_130796	113592179	113618564
TC1500001128.mm.1	1.133	up	0.0199314	0.598974	Copz1	NM_019817	coatomer protein complex, subunit zeta 1	protein_coding	chr15	+	NM_019817	103272909	103299869
TC1700000099.mm.1	1.24	up	0.00713265	0.512002	Gm17728	ENSMUST00000076982	predicted gene, 17728	protein_coding	chr17	+	ENSMUST00000076982	9422060	9422458
TC1700002354.mm.1	1.117	up	0.0479916	0.668555	Gpr108	NM_030084	G protein-coupled receptor 108	protein_coding	chr17	-	NM_030084	57234914	57247641
TC1800001083.mm.1	1.173	up	0.000478936	0.325656	Slc39a6	NM_139143	solute carrier family 39 (metal ion transporter), member 6	protein_coding	chr18	-	NM_139143	24579881	24603817
TC1900001603.mm.1	1.181	up	0.00801476	0.521837	Actr1a	NM_016860	ARP1 actin-related protein 1A, centractin alpha	protein_coding	chr19	-	NM_016860	46376813	46395735
TC0100000787.mm.1	-1.133	down	0.021306	0.603044	1700019O17Rik	NM_027966	RIKEN cDNA 1700019O17 gene	protein_coding	chr1	+	NM_027966	86426329	86428052
TC0100001563.mm.1	-1.165	down	0.00494443	0.469802	1700084C01Rik	NM_001033185	RIKEN cDNA 1700084C01 gene	protein_coding	chr1	+	NM_001033185	169928648	169934653
TC0100001860.mm.1	-1.133	down	0.00864035	0.530577	Rd3	NM_001177900	retinal degeneration 3	protein_coding	chr1	+	NM_001177900	191977373	191988282
TC0200002411.mm.1	-1.613	down	0.0137056	0.555944	Nnat	NM_010923	neuronatin	protein_coding	chr2	+	NM_010923	157560078	157562522
TC0200003023.mm.1	-1.197	down	0.0305768	0.633394	H2afb1	NM_026627	H2A histone family, member B1	protein_coding	chr2	-	NM_026627	17996417	17996958
TC0300000951.mm.1	-1.24	down	0.025997	0.622832	Ankrd34a	NM_001024851	ankyrin repeat domain 34A	protein_coding	chr3	+	NM_001024851	96596636	96599778
TC0300002712.mm.1	-1.197	down	0.0381228	0.645543	Ubl4b	NM_026261	ubiquitin-like 4B	protein_coding	chr3	-	NM_026261	107553698	107555073
TC0400002535.mm.1	-1.149	down	0.0175293	0.581623	Spag8	NM_001007463	sperm associated antigen 8	protein_coding	chr4	-	NM_001007463	43651330	43653594
TC0400003875.mm.1	-1.206	down	0.00709018	0.511641	C630004L07Rik	XR_104898	RIKEN cDNA C630004L07 gene	protein_coding	chr4	-	XR_104898	141238179	141239453
TC0500001673.mm.1	-1.141	down	0.0122363	0.543839	Gpr146	NM_001038703	G protein-coupled receptor 146	protein_coding	chr5	+	NM_001038703	139377697	139396415
TC0600001074.mm.1	-1.141	down	0.0110636	0.541217	Klf15	NM_023184	Kruppel-like factor 15	protein_coding	chr6	+	NM_023184	90462576	90475238
TC0600001146.mm.1	-1.149	down	0.00673152	0.507778	Gpr27	NM_008158	G protein-coupled receptor 27	protein_coding	chr6	+	NM_008158	99692679	99693818
TC0600003428.mm.1	-2.028	down	0.000254812	0.247152	Bhlhe41	NM_001271768	basic helix-loop-helix family, member e41	protein_coding	chr6	-	NM_001271768	145857294	145865558
TC0700000781.mm.1	-1.157	down	0.0111278	0.541217	Klk15	NM_174865	kallikrein related-peptidase 15	protein_coding	chr7	+	NM_174865	43933771	43939590
TC0700001201.mm.1	-1.117	down	0.030036	0.633183	Gm7964	ENSMUST00000042280	predicted gene 7964	protein_coding	chr7	+	ENSMUST00000042280	83755904	83757356
TC0700001871.mm.1	-1.165	down	0.0387269	0.647463	Fus	NM_139149	fused in sarcoma	protein_coding	chr7	+	NM_139149	127967457	127982368
TC0800000037.mm.1	-1.357	down	0.0209956	0.603044	A830058I18Rik	uc009kty.1	RIKEN cDNA A830058I18 gene	protein_coding	chr8	+	uc009kty.1	4527036	4529608
TC0X00001797.mm.1	-1.434	down	0.00183043	0.401088	Rbm3	NM_001166409	RNA binding motif protein 3	protein_coding	chrX	-	NM_001166409	8138975	8145880
TC0X00002081.mm.1	-1.11	down	0.0100836	0.534894	Rhox12	NM_001025083	reproductive homeobox 12	protein_coding	chrX	-	NM_001025083	38104062	38110907
TC1000001886.mm.1	-1.133	down	0.0129082	0.547112	Taar9	NM_001010831	trace amine-associated receptor 9	protein_coding	chr10	-	NM_001010831	24108389	24109582
TC1100000009.mm.1	-1.197	down	0.00846397	0.527241	Pik3ip1	NM_178149	phosphoinositide-3-kinase interacting protein 1	protein_coding	chr11	+	NM_178149	3330401	3342971
TC1100000960.mm.1	-1.223	down	0.0232967	0.61193	Gp1ba	NM_010326	glycoprotein 1b, alpha polypeptide	protein_coding	chr11	+	NM_010326	70639122	70642058
TC1100002712.mm.1	-1.206	down	0.00984768	0.532733	Olfr1373	NM_207227	olfactory receptor 1373	protein_coding	chr11	-	NM_207227	52144593	52145528
TC1100002728.mm.1	-1.133	down	0.00501103	0.47148	Leap2	NM_153069	liver-expressed antimicrobial peptide 2	protein_coding	chr11	-	NM_153069	53422181	53423170
TC1100004223.mm.1	-1.117	down	0.0326417	0.635778	Myadml2	NM_001204820	myeloid-associated differentiation marker-like 2	protein_coding	chr11	-	NM_001204820	120646031	120648337
TC1500002334.mm.1	-1.197	down	0.0104177	0.536387	Pdxp	NM_020271	pyridoxal (pyridoxine, vitamin B6) phosphatase	protein_coding	chr15	+	NM_020271	78913919	78919517
TC1600000097.mm.1	-1.223	down	0.000626986	0.341765	1810013L24Rik	NM_001081400	RIKEN cDNA 1810013L24 gene	protein_coding	chr16	+	NM_001081400	8830100	8858924
TC1600000099.mm.1	-1.301	down	0.000189678	0.2234	1810013L24Rik	uc007ydb.1	RIKEN cDNA 1810013L24 gene	protein_coding	chr16	+	uc007ydb.1	8847717	8852342
TC1600001199.mm.1	-1.149	down	0.0347529	0.641821	Tnp2	NM_013694	transition protein 2	protein_coding	chr16	-	NM_013694	10787935	10788655
TC1700000387.mm.1	-1.133	down	0.0469717	0.665641	Metrn	ENSMUST00000180868	meteorin, glial cell differentiation regulator	protein_coding	chr17	+	ENSMUST00000180868	25794894	25964784
TC1700000994.mm.1	-1.125	down	0.0387118	0.647463	Shd	NM_001159523	src homology 2 domain-containing transforming protein D	protein_coding	chr17	+	NM_001159523	55970467	55976620
TC1700001865.mm.1	-1.117	down	0.0145068	0.562764	Morc2b	NM_177719	microrchidia 2B	protein_coding	chr17	-	NM_177719	33135588	33139683
TC1700002052.mm.1	-1.125	down	0.0206656	0.602734	Olfr91	NM_182714	olfactory receptor 91	protein_coding	chr17	-	NM_182714	37092934	37093872
TC1800000276.mm.1	-1.189	down	0.0120203	0.542359	Gm10549	NR_045415	predicted gene 10549	protein_coding	chr18	+	NR_045415	33464163	33474710
TC1800000318.mm.1	-1.11	down	0.00177069	0.39589	Ube2d2a	NM_019912	ubiquitin-conjugating enzyme E2D 2A	protein_coding	chr18	+	NM_019912	35771559	35807172
TC1900000965.mm.1	-1.165	down	0.00855716	0.529521	Ccdc85b	NM_001243307	coiled-coil domain containing 85B	protein_coding	chr19	-	NM_001243307	5453163	5457563
